# Supplementary material for: Broadcasting climate change: An international survey on weather communicators' approaches
Source: Copernicus journal article supplement (doi:10.5194/egusphere-2025-852), 2025-03-20

| Marca temporal     | You authorize your ans | You are           | Country       |
|--------------------|------------------------|-------------------|---------------|
| 6/16/2021 12:25:28 | Yes                    | Female            | Portugal      |
| 7/18/2021 23:02:33 | Yes                    | Male              | Ireland       |
| 6/11/2021 12:53:56 | Yes                    | Male              | Tanzania      |
| 6/20/2021 9:42:26  | Yes                    | Male              | Israel        |
| 7/31/2021 0:44:22  | Yes                    | Female            | Peru          |
| 6/29/2021 23:23:23 | Yes                    | Female            | Ireland       |
| 6/12/2021 0:17:15  | Yes                    | Male              | Canada        |
| 6/23/2021 20:07:42 | Yes                    | Male              | Brazil        |
| 6/17/2021 2:39:19  | Yes                    | Female            | Ireland       |
| 6/13/2021 8:10:57  | Yes                    | Male              | Canada        |
| 6/15/2021 11:56:05 | Yes                    | Female            | Djibouti      |
| 7/1/2021 11:00:47  | Yes                    | Female            | Ireland       |
| 7/8/2021 13:00:36  | Yes                    | Prefer not to say | Ireland       |
| 6/20/2021 11:49:02 | Yes                    | Female            | Zambia        |
| 6/11/2021 22:33:24 | Yes                    | Male              | Argentina     |
| 6/16/2021 12:55:39 | Yes                    | Female            | Spain         |
| 7/30/2021 2:03:56  | Yes                    | Female            | Iceland       |
| 6/11/2021 21:06:34 | Yes                    | Female            | Mexico        |
| 6/12/2021 0:58:30  | Yes                    | Female            | Mexico        |
| 6/7/2021 22:08:50  | Yes                    | Male              | Ghana         |
| 6/29/2021 14:09:01 | Yes                    | Female            | Ireland       |
| 6/9/2021 10:19:28  | Yes                    | Male              | Croatia       |
| 6/10/2021 19:12:02 | Yes                    | Male              | Brazil        |
| 6/22/2021 22:22:17 | Yes                    | Female            | Argentina     |
| 6/15/2021 9:55:59  | Yes                    | Female            | Ghana         |
| 7/29/2021 16:35:20 | Yes                    | Male              | Ecuador       |
| 6/8/2021 22:48:45  | Yes                    | Male              | Spain         |
| 6/18/2021 15:07:59 | Yes                    | Male              | France        |
| 6/11/2021 3:18:18  | Yes                    | Male              | Argentina     |
| 7/3/2021 9:56:18   | Yes                    | Male              | Belgium       |
| 6/8/2021 20:44:38  | Yes                    | Male              | Spain         |
| 7/2/2021 22:07:17  | Yes                    | Male              | United States |
| 6/23/2021 12:40:36 | Yes                    | Male              | Syria         |
| 6/17/2021 21:17:52 | Yes                    | Male              | Nigeria       |
| 6/10/2021 18:34:17 | Yes                    | Male              | Spain         |
| 6/8/2021 20:56:01  | Yes                    | Male              | Spain         |
| 6/7/2021 21:47:59  | Yes                    | Male              | Ghana         |
| 6/22/2021 21:30:22 | Yes                    | Male              | Uruguay       |
| 6/8/2021 12:03:37  | Yes                    | Male              | Latvia        |
| 6/8/2021 0:56:52   | Yes                    | Male              | Ghana         |
| 6/8/2021 20:30:41  | Yes                    | Male              | Spain         |
| 6/27/2021 2:11:43  | Yes                    | Female            | Fiji          |
| 6/22/2021 20:15:26 | Yes                    | Male              | United States |
| 6/8/2021 23:39:50  | Yes                    | Male              | Spain         |
| 6/14/2021 20:43:25 | Yes                    | Male              | Portugal      |
| 6/14/2021 15:28:19 | Yes                    | Male              | Argentina     |
| 6/10/2021 19:16:37 | Yes                    | Male              | Brazil        |

|                        |        |                      |
|------------------------|--------|----------------------|
| 6/15/2021 11:30:27 Yes | Female | Eswatini             |
| 6/29/2021 11:48:30 Yes | Female | Ireland              |
| 6/19/2021 12:40:58 Yes | Male   | China                |
| 6/14/2021 17:37:44 Yes | Male   | Argentina            |
| 6/8/2021 16:24:03 Yes  | Male   | Croatia              |
| 6/23/2021 22:12:25 Yes | Male   | Dominica             |
| 6/9/2021 11:32:23 Yes  | Female | Seychelles           |
| 6/12/2021 0:49:01 Yes  | Male   | Belize               |
| 7/17/2021 17:18:26 Yes | Male   | United States        |
| 6/25/2021 20:34:15 Yes | Male   | Switzerland          |
| 6/24/2021 14:51:31 Yes | Female | Switzerland          |
| 6/24/2021 17:59:18 Yes | Female | Switzerland          |
| 6/23/2021 14:35:07 Yes | Female | Slovenia             |
| 6/16/2021 23:15:28 Yes | Male   | Congo, Democratic Re |
| 6/21/2021 12:37:33 Yes | Male   | Australia            |
| 6/17/2021 6:43:26 Yes  | Male   | Honduras             |
| 6/14/2021 17:20:13 Yes | Female | United Kingdom       |
| 7/30/2021 10:55:05 Yes | Female | Serbia               |
| 8/5/2021 14:37:47 Yes  | Female | Iceland              |
| 6/24/2021 1:08:15 Yes  | Female | Mozambique           |
| 6/16/2021 17:33:05 Yes | Female | Brazil               |
| 6/13/2021 12:15:59 Yes | Male   | Spain                |
| 6/11/2021 22:13:14 Yes | Female | Canada               |
| 7/18/2021 16:09:22 Yes | Male   | Trinidad and Tobago  |
| 6/23/2021 11:49:50 Yes | Male   | Austria              |
| 6/16/2021 18:42:35 Yes | Female | Canada               |
| 6/24/2021 11:39:46 Yes | Female | Netherlands          |
| 7/17/2021 14:49:43 Yes | Female | Finland              |
| 6/30/2021 3:14:06 Yes  | Female | Japan                |
| 6/30/2021 5:26:15 Yes  | Female | Japan                |
| 6/8/2021 13:32:26 Yes  | Male   | Croatia              |
| 7/21/2021 21:34:19 Yes | Female | Malawi               |
| 6/22/2021 23:28:53 Yes | Female | United States        |
| 7/8/2021 3:59:45 Yes   | Male   | United States        |
| 6/23/2021 14:09:35 Yes | Female | United States        |
| 6/24/2021 4:12:12 Yes  | Male   | United States        |
| 6/11/2021 0:57:28 Yes  | Male   | Italy                |
| 6/8/2021 22:28:17 Yes  | Male   | Spain                |
| 6/12/2021 21:57:49 Yes | Male   | Canada               |
| 6/15/2021 9:51:25 Yes  | Female | Kenya                |
| 6/16/2021 10:49:12 Yes | Female | Uganda               |
| 6/14/2021 22:52:20 Yes | Female | United Kingdom       |
| 7/26/2021 13:25:31 Yes | Male   | Colombia             |
| 6/11/2021 22:54:56 Yes | Male   | Dominican Republic   |
| 9/26/2021 12:17:55 Yes | Female | Iran                 |
| 6/10/2021 1:18:13 Yes  | Male   | Spain                |
| 6/15/2021 19:57:46 Yes | Male   | Greece               |
| 6/22/2021 23:28:49 Yes | Male   | United States        |

|                        |        |                     |
|------------------------|--------|---------------------|
| 6/21/2021 16:07:43 Yes | Male   | Burkina Faso        |
| 6/14/2021 20:03:19 Yes | Male   | Canada              |
| 6/12/2021 14:49:55 Yes | Female | Brazil              |
| 6/8/2021 15:22:38 Yes  | Male   | Croatia             |
| 6/11/2021 3:43:34 Yes  | Male   | China               |
| 6/7/2021 22:53:57 Yes  | Male   | United Kingdom      |
| 6/14/2021 9:03:25 Yes  | Female | Croatia             |
| 6/16/2021 12:09:46 Yes | Female | Bulgaria            |
| 6/25/2021 18:28:17 Yes | Male   | Trinidad and Tobago |
| 6/23/2021 13:34:50 Yes | Female | Slovenia            |
| 6/16/2021 10:33:23 Yes | Male   | Ireland             |
| 7/22/2021 6:44:40 Yes  | Female | United States       |
| 6/16/2021 17:28:10 Yes | Male   | Canada              |
| 7/2/2021 20:10:07 Yes  | Male   | Indonesia           |
| 6/18/2021 9:38:50 Yes  | Female | Czech Republic      |
| 6/7/2021 21:30:32 Yes  | Male   | Spain               |
| 6/9/2021 0:35:25 Yes   | Female | Portugal            |
| 7/30/2021 10:24:08 Yes | Male   | Norway              |
| 6/16/2021 18:26:47 Yes | Male   | Qatar               |
| 7/2/2021 19:13:21 Yes  | Male   | Venezuela           |
| 6/15/2021 16:35:22 Yes | Male   | Sri Lanka           |
| 7/18/2021 14:57:02 Yes | Female | Germany             |
| 6/14/2021 18:11:47 Yes | Male   | Nigeria             |
| 6/14/2021 18:18:49 Yes | Female | Namibia             |
| 6/8/2021 10:49:53 Yes  | Female | Namibia             |
| 6/14/2021 21:27:34 Yes | Female | Bulgaria            |
| 7/4/2021 8:47:25 Yes   | Male   | Namibia             |
| 6/14/2021 14:11:26 Yes | Female | Netherlands         |
| 6/24/2021 13:49:00 Yes | Male   | Burundi             |
| 6/24/2021 2:06:46 Yes  | Male   | Japan               |
| 6/24/2021 9:46:46 Yes  | Male   | Malta               |
| 6/24/2021 15:55:47 Yes | Male   | Lithuania           |
| 6/8/2021 23:50:08 Yes  | Female | Spain               |
| 6/11/2021 23:52:42 Yes | Male   | Canada              |
| 6/10/2021 10:00:20 Yes | Male   | Spain               |
| 6/20/2021 20:46:31 Yes | Male   | Denmark             |
| 6/15/2021 15:33:00 Yes | Male   | United States       |
| 6/10/2021 23:58:01 Yes | Male   | Chile               |
| 6/24/2021 23:06:22 Yes | Male   | Hungary             |
| 6/12/2021 20:00:36 Yes | Male   | United States       |
| 6/23/2021 11:14:17 Yes | Male   | France              |
| 6/9/2021 10:16:51 Yes  | Male   | Spain               |
| 6/29/2021 5:38:23 Yes  | Male   | United States       |
| 6/14/2021 14:09:11 Yes | Female | Sweden              |
| 6/23/2021 15:51:44 Yes | Male   | Austria             |
| 7/17/2021 14:23:26 Yes | Male   | United States       |
| 7/29/2021 4:43:55 Yes  | Female | Ecuador             |
| 6/9/2021 8:59:11 Yes   | Male   | Spain               |

|                        |        |               |
|------------------------|--------|---------------|
| 6/26/2021 16:08:24 Yes | Female | United States |
| 7/2/2021 21:58:40 Yes  | Female | United States |
| 7/18/2021 1:27:29 Yes  | Male   | United States |
| 6/23/2021 15:45:02 Yes | Female | United States |
| 6/23/2021 17:40:19 Yes | Male   | United States |
| 7/3/2021 16:13:59 Yes  | Male   | Netherlands   |
| 6/23/2021 20:59:40 Yes | Male   | United States |
| 6/11/2021 19:10:58 Yes | Male   | Canada        |
| 7/17/2021 14:01:24 Yes | Male   | United States |
| 6/23/2021 14:03:28 Yes | Female | United States |
| 6/10/2021 16:08:30 Yes | Male   | Russia        |
| 6/8/2021 22:54:22 Yes  | Male   | Spain         |
| 6/15/2021 2:45:54 Yes  | Male   | Egypt         |
| 7/3/2021 1:00:36 Yes   | Male   | New Zealand   |
| 6/7/2021 21:59:57 Yes  | Female | Canada        |
| 6/21/2021 13:29:54 Yes | Male   | Cyprus        |
| 6/17/2021 14:16:18 Yes | Female | Portugal      |
| 6/20/2021 12:51:51 Yes | Female | Netherlands   |
| 6/10/2021 7:09:56 Yes  | Female | Finland       |
| 6/10/2021 0:46:52 Yes  | Female | Spain         |
| 6/23/2021 11:12:58 Yes | Male   | United States |
| 6/8/2021 20:54:07 Yes  | Male   | Spain         |
| 6/21/2021 13:50:26 Yes | Female | Philippines   |
| 6/22/2021 23:53:05 Yes | Female | Germany       |
| 6/13/2021 17:54:27 Yes | Male   | Croatia       |
| 6/9/2021 13:13:58 Yes  | Male   | Argentina     |
| 6/14/2021 15:21:01 Yes | Male   | Argentina     |
| 6/14/2021 7:14:58 Yes  | Male   | Spain         |
| 6/8/2021 3:54:32 Yes   | Male   | India         |
| 7/2/2021 19:07:57 Yes  | Male   | India         |
| 6/10/2021 22:26:31 Yes | Female | Russia        |
| 7/26/2021 1:39:02 Yes  | Female | Spain         |
| 6/7/2021 22:13:33 Yes  | Female | Italy         |
| 6/8/2021 10:24:51 Yes  | Male   | Croatia       |
| 6/8/2021 11:59:48 Yes  | Male   | Croatia       |
| 6/9/2021 1:50:39 Yes   | Male   | Cuba          |
| 6/22/2021 23:39:22 Yes | Female | Belgium       |
| 6/23/2021 13:08:50 Yes | Female | Belgium       |
| 7/2/2021 19:15:32 Yes  | Male   | Netherlands   |
| 7/21/2021 14:47:43 Yes | Male   | Spain         |
| 6/14/2021 14:48:35 Yes | Male   | Poland        |
| 7/12/2021 13:45:39 Yes | Male   | Japan         |
| 6/8/2021 14:42:23 Yes  | Female | Croatia       |
| 7/17/2021 15:57:49 Yes | Female | United States |
| 7/17/2021 17:41:10 Yes | Male   | Argentina     |
| 8/1/2021 12:21:41 Yes  | Female | Croatia       |
| 6/23/2021 18:38:25 Yes | Female | United States |
| 6/13/2021 10:01:27 Yes | Male   | South Africa  |

|                        |        |               |
|------------------------|--------|---------------|
| 6/14/2021 14:00:07 Yes | Female | Thailand      |
| 6/22/2021 21:24:13 Yes | Male   | Italy         |
| 6/25/2021 16:19:33 Yes | Male   | United States |
| 6/11/2021 6:24:13 Yes  | Female | Panama        |
| 7/18/2021 0:58:37 Yes  | Male   | Spain         |
| 6/15/2021 4:22:50 Yes  | Female | Uganda        |
| 6/21/2021 16:03:17 Yes | Male   | Taiwan        |
| 6/21/2021 11:37:34 Yes | Male   | Andorra       |
| 6/14/2021 16:10:16 Yes | Female | Argentina     |
| 6/14/2021 16:25:17 Yes | Male   | Argentina     |
| 6/10/2021 18:03:46 Yes | Male   | Morocco       |
| 6/8/2021 20:53:54 Yes  | Male   | Spain         |
| 7/22/2021 10:20:04 No  |        |               |





| Your age       | Which option better define for main occupa    | How many years have |
|----------------|-----------------------------------------------|---------------------|
| 46 to 55 years | Weather Service                               | 21 to 30 years      |
| 66 to 75 years | Retired from Met Service                      | More than 30 years  |
| 36 to 45 years | Weather Service                               | 11 to 20 years      |
| 46 to 55 years | I work at KAN11, the Israely public station ε | 21 to 30 years      |
| 36 to 45 years | salud                                         | 1 to 10 years       |
| 36 to 45 years | Weather Service                               | 11 to 20 years      |
| 26 to 35 years | Private TV                                    | 11 to 20 years      |
| 46 to 55 years | Private TV                                    | 11 to 20 years      |
| 36 to 45 years | Public TV                                     | 21 to 30 years      |
| 56 to 65 years | Public TV                                     | More than 30 years  |
| 36 to 45 years | Weather Service                               | 1 to 10 years       |
| 26 to 35 years | Weather Service                               | 1 to 10 years       |
| 36 to 45 years | Weather Service                               | 1 to 10 years       |
| 46 to 55 years | Weather Service                               | 21 to 30 years      |
| 36 to 45 years | Private TV                                    | 11 to 20 years      |
| 46 to 55 years | Public TV                                     | 21 to 30 years      |
| 36 to 45 years | Weather Service                               | 1 to 10 years       |
| 46 to 55 years | Private TV                                    | 21 to 30 years      |
| 46 to 55 years | Private TV                                    | 21 to 30 years      |
| 36 to 45 years | Disaster Risk Reduction                       | 11 to 20 years      |
| 56 to 65 years | former TV meteorologist; now Head forecas     | More than 30 years  |
| 36 to 45 years | Weather Service                               | 11 to 20 years      |
| 26 to 35 years | Weather Service                               | 1 to 10 years       |
| 56 to 65 years | Weather Service                               | 21 to 30 years      |
| 36 to 45 years | Weather Service                               | 21 to 30 years      |
| 26 to 35 years | Weather Service                               | 1 to 10 years       |
| 66 to 75 years | Social Networks                               | More than 30 years  |
| 46 to 55 years | Weather Service                               | 21 to 30 years      |
| 56 to 65 years | Empresa Argentina de Navegación Aérea         | More than 30 years  |
| 46 to 55 years | Weather Service                               | 21 to 30 years      |
| 46 to 55 years | Public TV                                     | More than 30 years  |
| 46 to 55 years | University Professor                          | 21 to 30 years      |
| 46 to 55 years | Weather Service                               | More than 30 years  |
| 36 to 45 years | Weather Service                               | 11 to 20 years      |
| 36 to 45 years | Weather Service                               | 11 to 20 years      |
| 36 to 45 years | Public TV                                     | 21 to 30 years      |
| 26 to 35 years | Internet news site                            | 1 to 10 years       |
| 36 to 45 years | Weather Service                               | 11 to 20 years      |
| 26 to 35 years | Public TV                                     | 11 to 20 years      |
| 36 to 45 years | Social Networks                               | 1 to 10 years       |
| 26 to 35 years | Social Networks                               | 11 to 20 years      |
| 36 to 45 years | Public TV                                     | 1 to 10 years       |
| 46 to 55 years | Public TV                                     | 21 to 30 years      |
| 56 to 65 years | Social Networks                               | 1 to 10 years       |
| 56 to 65 years | Weather Service                               | 11 to 20 years      |
| 46 to 55 years | Weather Service                               | 21 to 30 years      |
| 15 to 25 years | Weather Service                               | 1 to 10 years       |



|                |                                       |                    |
|----------------|---------------------------------------|--------------------|
| 26 to 35 years | Weather Service                       | 1 to 10 years      |
| 36 to 45 years | Weather Service                       | 11 to 20 years     |
| 36 to 45 years | Public TV                             | 1 to 10 years      |
| 46 to 55 years | Private TV                            | 21 to 30 years     |
| 46 to 55 years | Weather Service                       | 11 to 20 years     |
| 46 to 55 years | Weather Service                       | 21 to 30 years     |
| 46 to 55 years | Weather Service                       | More than 30 years |
| 56 to 65 years | Private Meteorological Company        | 21 to 30 years     |
| 66 to 75 years | Public TV                             | More than 30 years |
| 46 to 55 years | Public TV                             | 21 to 30 years     |
| 56 to 65 years | Public TV                             | 21 to 30 years     |
| 56 to 65 years | Public TV                             | 21 to 30 years     |
| 46 to 55 years | Weather Service                       | 21 to 30 years     |
| 46 to 55 years | Public TV                             | 21 to 30 years     |
| 36 to 45 years | Public TV                             | 11 to 20 years     |
| 56 to 65 years | Weather Service                       | More than 30 years |
| 36 to 45 years | Private TV                            | 21 to 30 years     |
| 26 to 35 years | Private TV                            | 1 to 10 years      |
| 36 to 45 years | Weather Service                       | 11 to 20 years     |
| 36 to 45 years | Weather Service                       | 1 to 10 years      |
| 36 to 45 years | Weather Service                       | 11 to 20 years     |
| 46 to 55 years | Public TV                             | 11 to 20 years     |
| 36 to 45 years | Public TV                             | 11 to 20 years     |
| 46 to 55 years | Public TV                             | 11 to 20 years     |
| 46 to 55 years | Weather Service                       | 21 to 30 years     |
| 46 to 55 years | Private TV                            | 21 to 30 years     |
| 46 to 55 years | Weather Service                       | 1 to 10 years      |
| 56 to 65 years | Public TV                             | More than 30 years |
| 26 to 35 years | Private TV                            | 11 to 20 years     |
| 26 to 35 years | Private TV                            | 11 to 20 years     |
| 56 to 65 years | Weather Service                       | More than 30 years |
| 46 to 55 years | Weather Service                       | 21 to 30 years     |
| 36 to 45 years | Private TV                            | 11 to 20 years     |
| 36 to 45 years | Public TV                             | 11 to 20 years     |
| 26 to 35 years | National Laboratory                   | 11 to 20 years     |
| 56 to 65 years | Private TV                            | More than 30 years |
| 46 to 55 years | Private TV                            | 21 to 30 years     |
| 56 to 65 years | Weather Service                       | More than 30 years |
| 46 to 55 years | Private Meteorological Company        | 21 to 30 years     |
| 26 to 35 years | Weather Service                       | 1 to 10 years      |
| 26 to 35 years | Private Meteorological Company        | 1 to 10 years      |
| 36 to 45 years | Public TV                             | 11 to 20 years     |
| 36 to 45 years | Radio                                 | 1 to 10 years      |
| 56 to 65 years | Weather Service                       | More than 30 years |
| 36 to 45 years | Internet news site                    | 1 to 10 years      |
| 46 to 55 years | Public TV                             | 21 to 30 years     |
| 46 to 55 years | Weather Service                       | 11 to 20 years     |
| 76 to 85 years | retired private sector and private TV | More than 30 years |

|                |                                           |                    |
|----------------|-------------------------------------------|--------------------|
| 46 to 55 years | Public TV                                 | 21 to 30 years     |
| 56 to 65 years | Public TV                                 | 21 to 30 years     |
| 36 to 45 years | Private TV                                | 1 to 10 years      |
| 36 to 45 years | Radio                                     | 1 to 10 years      |
| 36 to 45 years | Weather Service                           | 1 to 10 years      |
| 56 to 65 years | Public TV                                 | More than 30 years |
| 56 to 65 years | Weather Service                           | 11 to 20 years     |
| 36 to 45 years | Private TV                                | 11 to 20 years     |
| 36 to 45 years | Weather Service                           | 11 to 20 years     |
| 56 to 65 years | Governmental institution                  | More than 30 years |
| 56 to 65 years | Weather Service                           | More than 30 years |
| 46 to 55 years | Public TV                                 | 21 to 30 years     |
| 26 to 35 years | Private TV                                | 1 to 10 years      |
| 46 to 55 years | Internet news site                        | 1 to 10 years      |
| 56 to 65 years | Public TV                                 | More than 30 years |
| 56 to 65 years | Public TV                                 | More than 30 years |
| 56 to 65 years | Consultant - meteorology                  | More than 30 years |
| 56 to 65 years | Weather graphics system provider and clim | 21 to 30 years     |
| 56 to 65 years | Public TV                                 | 21 to 30 years     |
| 46 to 55 years | Weather Service                           | 1 to 10 years      |
| 36 to 45 years | Private TV                                | 1 to 10 years      |
| 66 to 75 years | Public TV                                 | 21 to 30 years     |
| 46 to 55 years | Weather Service                           | 11 to 20 years     |
| 46 to 55 years | Public TV                                 | 21 to 30 years     |
| 36 to 45 years | Weather Service                           | 11 to 20 years     |
| 36 to 45 years | Private TV                                | 11 to 20 years     |
| 46 to 55 years | Weather Service                           | 21 to 30 years     |
| 36 to 45 years | Public TV                                 | 11 to 20 years     |
| 36 to 45 years | Weather Service                           | 1 to 10 years      |
| 46 to 55 years | Private Meteorological Company            | 21 to 30 years     |
| 46 to 55 years | University academic                       | 11 to 20 years     |
| 26 to 35 years | University                                | 1 to 10 years      |
| 36 to 45 years | Private TV                                | 1 to 10 years      |
| 36 to 45 years | Public TV                                 | 11 to 20 years     |
| 36 to 45 years | Weather Service                           | 1 to 10 years      |
| 56 to 65 years | Internet news site                        | More than 30 years |
| 56 to 65 years | Private TV                                | More than 30 years |
| 36 to 45 years | Private TV                                | 11 to 20 years     |
| 36 to 45 years | Public TV                                 | 11 to 20 years     |
| 56 to 65 years | Private TV                                | More than 30 years |
| 66 to 75 years | Private TV                                | More than 30 years |
| 46 to 55 years | Internet news site                        | 21 to 30 years     |
| 36 to 45 years | Public TV                                 | 11 to 20 years     |
| 46 to 55 years | Private TV                                | More than 30 years |
| 46 to 55 years | Public TV                                 | 21 to 30 years     |
| 36 to 45 years | Private TV                                | 11 to 20 years     |
| 26 to 35 years | Printed Press                             | 1 to 10 years      |
| 46 to 55 years | Internet news site                        | 21 to 30 years     |

|                |                                               |                    |
|----------------|-----------------------------------------------|--------------------|
| 36 to 45 years | Private TV                                    | 11 to 20 years     |
| 26 to 35 years | Public TV                                     | 1 to 10 years      |
| 56 to 65 years | Private TV                                    | More than 30 years |
| 26 to 35 years | Private TV                                    | 1 to 10 years      |
| 36 to 45 years | Private TV                                    | 21 to 30 years     |
| 56 to 65 years | Public TV                                     | More than 30 years |
| 46 to 55 years | Public TV                                     | 21 to 30 years     |
| 56 to 65 years | Private Meteorological Company                | More than 30 years |
| 36 to 45 years | Private TV                                    | 11 to 20 years     |
| 56 to 65 years | Private TV                                    | More than 30 years |
| 36 to 45 years | Scientific Institute                          | 11 to 20 years     |
| 46 to 55 years | Radio                                         | 21 to 30 years     |
| 46 to 55 years | Weather Service                               | 11 to 20 years     |
| 56 to 65 years | Academia                                      | 21 to 30 years     |
| 46 to 55 years | Weather Service                               | More than 30 years |
| 46 to 55 years | Weather Service                               | 21 to 30 years     |
| 56 to 65 years | Meteorologist at IPMA                         | 11 to 20 years     |
| 46 to 55 years | ambassador for weather, climate, sustainat    | 21 to 30 years     |
| 26 to 35 years | Public TV                                     | 11 to 20 years     |
| 36 to 45 years | Weather Service                               | 21 to 30 years     |
| 36 to 45 years | Private TV                                    | 11 to 20 years     |
| 46 to 55 years | Public TV                                     | 11 to 20 years     |
| 26 to 35 years | Private TV                                    | 1 to 10 years      |
| 46 to 55 years | Public TV                                     | 21 to 30 years     |
| 66 to 75 years | Weather Service                               | More than 30 years |
| 56 to 65 years | Private TV                                    | More than 30 years |
| 26 to 35 years | Weather Service                               | 11 to 20 years     |
| 36 to 45 years | Public TV                                     | 11 to 20 years     |
| 26 to 35 years | Public TV                                     | 11 to 20 years     |
| 26 to 35 years | Public TV                                     | 1 to 10 years      |
| 36 to 45 years | freelance writing for different media         | 11 to 20 years     |
| 36 to 45 years | Private TV                                    | 11 to 20 years     |
| 46 to 55 years | Public TV                                     | 21 to 30 years     |
| 46 to 55 years | Public TV                                     | 21 to 30 years     |
| 56 to 65 years | little from everthing but basicaly from a Gov | 11 to 20 years     |
| 66 to 75 years | Public TV                                     | More than 30 years |
| 46 to 55 years | Private TV                                    | 11 to 20 years     |
| 46 to 55 years | Private TV                                    | 11 to 20 years     |
| 56 to 65 years | Public TV                                     | More than 30 years |
| 46 to 55 years | Private TV                                    | 21 to 30 years     |
| 56 to 65 years | Private TV                                    | 11 to 20 years     |
| 26 to 35 years | Public TV                                     | 11 to 20 years     |
| 46 to 55 years | Weather Service                               | 21 to 30 years     |
| 36 to 45 years | Private TV                                    | 11 to 20 years     |
| 46 to 55 years | Internet news site                            | 21 to 30 years     |
| 36 to 45 years | Private TV                                    | 11 to 20 years     |
| 26 to 35 years | Public TV                                     | 1 to 10 years      |
| 36 to 45 years | Public TV                                     | 1 to 10 years      |

|                |                                |                    |
|----------------|--------------------------------|--------------------|
| 26 to 35 years | Public TV                      | 1 to 10 years      |
| 46 to 55 years | Printed Press                  | More than 30 years |
| 66 to 75 years | Internet news site             | More than 30 years |
| 56 to 65 years | Social Networks                | 21 to 30 years     |
| 56 to 65 years | Public TV                      | More than 30 years |
| 26 to 35 years | Weather Service                | 1 to 10 years      |
| 46 to 55 years | Private Meteorological Company | 11 to 20 years     |
| 46 to 55 years | Public TV                      | 11 to 20 years     |
| 26 to 35 years | Weather Service                | 1 to 10 years      |
| 36 to 45 years | Academia                       | 1 to 10 years      |
| 26 to 35 years | Public TV                      | 11 to 20 years     |
| 46 to 55 years | Public TV                      | 21 to 30 years     |





Besides your principal occupation, choose other communication channels and/or social networks that you are ac

Private TV, Internet news site, Weather Service

Printed press, Weather Service

Public TV, Private TV, Radio, Weather Service, Youtube, Instagram, Whatsapp

Public TV, Radio, Twitter, Facebook, Whatsapp

Twitter, Facebook, Instagram, Whatsapp

Public TV, Private TV, Radio, Printed press, Internet news site, Weather Service, Youtube, Twitter, Facebook, V

Radio, Internet news site, Twitter, Facebook, Instagram, Tik Tok

Radio, Internet news site, Personal Blog, Twitter, Facebook, Instagram, Whatsapp

Twitter

Public TV, Radio, Internet news site, Youtube, Personal Blog, Twitter, Facebook, Instagram, LinkedIn

Public TV, Weather Service, Youtube, Facebook, Whatsapp

Public TV, Radio, Printed press, Internet news site, Weather Service, Twitter, Facebook, Instagram, Whatsapp

Public TV, Private TV, Radio, Internet news site, Weather Service, Facebook, Instagram, LinkedIn, Whatsapp

Public TV, Private TV, Radio, Printed press, Weather Service, Youtube, Twitter, Facebook, Whatsapp

Radio, Youtube, Twitter, Facebook, Instagram, Telegram, Whatsapp

Radio, Twitter, Instagram

Public TV, Twitter, Facebook, LinkedIn, Whatsapp

Twitter, Facebook, LinkedIn, Whatsapp

Twitter, Facebook, LinkedIn, Whatsapp

Public TV, Radio, Internet news site, Weather Service, Private Meteorological Company, Youtube, Twitter, Facel

Public TV, Private TV, Radio, Printed press, Weather Service

Public TV, Radio, Twitter, Instagram, Whatsapp

Twitter, Facebook, Instagram, Whatsapp

Public TV, Internet news site, Weather Service, Youtube, Instagram, LinkedIn, Whatsapp

Public TV, Radio, Internet news site, Youtube, Twitter, Facebook, Instagram, Whatsapp

Twitter, Facebook, Instagram, Telegram, Whatsapp

Personal Blog, Twitter, Facebook

Public TV, Private TV, Radio, Internet news site, Weather Service, Private Meteorological Company, Twitter, Lin

Internet news site, Weather Service, Private Meteorological Company, Whatsapp

Private TV, Radio, Printed press, Internet news site, Weather Service, Twitter, Facebook, Instagram, LinkedIn, V

Public TV, Radio, Internet news site, Twitter, Facebook

Public TV, Radio, Youtube, Twitter, Facebook

Public TV, Weather Service, Facebook, Telegram, Whatsapp

Public TV, Youtube, Twitter, Facebook, LinkedIn, Whatsapp

Radio, Printed press, Weather Service, Private Meteorological Company, Twitter, Facebook, Instagram, Whatsa

Radio, Twitter, Facebook

Public TV, Facebook, Whatsapp

Public TV, Private TV, Radio, Weather Service, Twitter, Facebook, Instagram, Whatsapp

Public TV, Radio, Internet news site, Twitter, Facebook, Instagram

Whatsapp

Private TV, Radio, Printed press, Internet news site, Youtube, Personal Blog, Twitter, Facebook, Instagram

Public TV, Youtube, Twitter, Facebook, Instagram, Whatsapp

Personal Blog, Twitter, Facebook, Instagram, LinkedIn

Private TV, Radio, Printed press, Personal Blog, Twitter, Facebook, Instagram, Telegram, Whatsapp

Twitter, Facebook, LinkedIn

Public TV, Radio, Facebook

Youtube, Twitter, Facebook, Instagram, Whatsapp

Public TV, Private TV, Radio, Printed press, Internet news site, Facebook, Whatsapp  
Public TV, Radio, Printed press, Weather Service, Youtube, Twitter, Facebook, Instagram, LinkedIn  
Youtube  
Twitter  
Public TV, Radio, Weather Service, Facebook  
Public TV, Private TV, Radio, Printed press, Internet news site, Weather Service, Facebook, Whatsapp, digicel t  
Public TV, Radio, Youtube, Whatsapp  
Internet news site, Facebook  
Internet news site, Facebook, Instagram  
Radio, Internet news site, Twitter, Instagram  
Whatsapp  
Whatsapp  
Internet news site, Youtube, Twitter, Facebook  
Radio, Twitter, Instagram, Whatsapp  
Public TV, Radio, Printed press, Internet news site, Weather Service, Youtube, Twitter, Facebook, Instagram  
Weather Service  
Private Meteorological Company, Twitter, Facebook, Instagram, Whatsapp  
Public TV, Internet news site, Weather Service, Facebook, Instagram  
Public TV, Radio, Twitter, Facebook, LinkedIn  
Weather Service  
Private TV, Radio, Internet news site, Weather Service, Private Meteorological Company, Youtube, Twitter, Facebook  
Radio, Twitter  
Radio, Internet news site, Twitter, Facebook, Instagram  
Radio, Twitter  
Public TV, Private TV, Radio, Printed press, Internet news site, Weather Service, Personal Blog, Twitter, Facebook  
Private TV, Twitter, Facebook, Instagram  
Youtube, Twitter, Instagram, LinkedIn, Whatsapp, Slack  
Radio  
Public TV, Private TV, Radio, Printed press, Internet news site, Weather Service, Twitter, Facebook, Instagram,  
Public TV, Private TV, Radio, Printed press, Internet news site, Weather Service, Twitter, Facebook, Instagram,  
Printed press, Internet news site, Whatsapp  
Public TV, Weather Service, Facebook  
Private TV, Radio, Internet news site, Twitter, Facebook, Instagram  
Twitter, Facebook, Instagram, LinkedIn, Telegram  
Internet news site, Private Meteorological Company, Personal Blog, Twitter, Facebook, LinkedIn  
Radio, Internet news site, Twitter, Facebook, LinkedIn, Whatsapp  
Radio, Printed press, Internet news site, Weather Service, Private Meteorological Company, Personal Blog, Twitter  
Public TV, Radio, Printed press, Internet news site, Weather Service, Twitter, Facebook, Instagram, LinkedIn, W  
Public TV, Twitter, LinkedIn  
Public TV, Radio, Weather Service, Twitter, Facebook, Instagram, Whatsapp  
Public TV  
Twitter, Instagram, Whatsapp  
Spotify, Google Podcast  
Radio, Internet news site, Twitter, Facebook, Instagram, LinkedIn, Whatsapp  
Twitter, Facebook, Instagram, LinkedIn, Whatsapp  
Private TV, Radio, Internet news site, Weather Service, Private Meteorological Company, Twitter  
Public TV, Twitter, LinkedIn  
Public TV, Private TV, Radio, Printed press, Internet news site, Weather Service, Facebook



Public TV, Radio, Youtube, Whatsapp  
Radio, Personal Blog, Twitter, Facebook  
Instagram  
Public TV, Private TV, Internet news site  
Public TV, Private TV, Youtube, Facebook, Instagram  
Telegram, Whatsapp  
Public TV, Radio, Internet news site, Weather Service, Youtube, Twitter, Linkedin, Whatsapp, Slack  
Printed press, Internet news site, Private Meteorological Company, Twitter, Facebook, Linkedin, Whatsapp  
Public TV, Radio, Printed press, Internet news site, Weather Service, Youtube, Twitter, Facebook, Instagram, Li  
Public TV, Printed press, Facebook, Linkedin  
Public TV, Radio, Printed press, Linkedin  
Radio, Weather Service, Twitter, Facebook, Instagram, Linkedin, Whatsapp  
Youtube, Twitter, Facebook  
Twitter  
Radio, Internet news site, Twitter, Facebook, Instagram  
Radio, Printed press, Internet news site, Twitter, Facebook, Instagram, Linkedin, Whatsapp  
Internet news site  
Internet news site, Weather Service, Twitter, Facebook, Instagram, Linkedin, Whatsapp, Slack  
Radio, Internet news site, Personal Blog, Twitter, Facebook  
Personal Blog, Instagram, Whatsapp, twitter  
Radio, Internet news site, Youtube, Twitter, Facebook, Whatsapp  
Public TV, Radio, Printed press, Internet news site, Weather Service, Youtube, Signal  
Public TV, Weather Service, Youtube, Linkedin, Telegram, Whatsapp  
Public TV, Radio, Printed press, Internet news site, Weather Service, Facebook, Linkedin, Whatsapp  
Public TV, Radio, Weather Service  
Private TV, Radio, Internet news site, Facebook, Instagram  
Public TV, Radio, Whatsapp  
Public TV, Radio, Internet news site, Personal Blog, Twitter, Instagram, Linkedin, Whatsapp  
Public TV, Private TV, Radio, Internet news site, Weather Service, Youtube, Twitter, Facebook  
Public TV, Radio, Internet news site, Weather Service, Youtube, Twitter, Facebook, Instagram, Linkedin  
Public TV, Internet news site, Youtube, Facebook, Linkedin  
Public TV, Private TV, Radio, Facebook  
Public TV, Private TV, Internet news site, Private Meteorological Company, Twitter, Linkedin  
Radio, Internet news site, Twitter, Facebook, Instagram  
Twitter, Telegram  
Public TV, Printed press, Personal Blog, Twitter, Facebook, Linkedin  
Twitter, Facebook, Instagram, Whatsapp  
Twitter, Facebook, Instagram, Whatsapp  
Radio, Internet news site, Weather Service, Facebook, Whatsapp  
Radio, Internet news site, Private Meteorological Company, Twitter, Facebook, Instagram, Linkedin, Whatsapp  
Radio, Private Meteorological Company, Facebook  
Public TV, Internet news site, Weather Service, Twitter, Facebook, Instagram  
Youtube, Twitter, Facebook  
Private TV, Radio, Printed press, Internet news site, Twitter, Facebook, Instagram, Whatsapp  
Public TV, Radio, Youtube, Twitter, Facebook, Instagram  
Twitter, Facebook, Instagram  
Radio, Printed press, Internet news site, Instagram  
Twitter, Facebook, Instagram

Internet news site, Weather Service, Youtube, Twitter, Facebook, Instagram, LinkedIn  
Radio, Twitter, Facebook  
Private TV, Radio, Youtube, Twitter, Facebook, Instagram, LinkedIn, Slack  
Twitter, Facebook, Instagram, Tik Tok  
Internet news site, Youtube, Twitter, Facebook, Instagram, LinkedIn, Whatsapp  
Radio, Printed press, Internet news site, Twitter, Facebook, LinkedIn  
Youtube, Personal Blog, Twitter, Facebook, Instagram, LinkedIn  
Private TV, Radio, Internet news site, Private Meteorological Company, Twitter, Facebook  
Private TV, Internet news site, Private Meteorological Company, Twitter, Facebook, Instagram  
Radio, Internet news site, Twitter, Facebook, Instagram  
Public TV, Radio, Printed press, Internet news site, Facebook, Lectures on various sci-pop fora  
Public TV, Printed press, Internet news site, Private Meteorological Company, Personal Blog, Twitter  
LinkedIn, Telegram, Whatsapp  
Public TV, Radio, Printed press, Internet news site, Twitter, LinkedIn  
Twitter, Facebook, Messages delivered via wx app  
Public TV, Private TV, Radio, Printed press, Internet news site, Weather Service, Facebook, Whatsapp  
Public TV, Private TV, Radio, Printed press, Internet news site, Weather Service, Twitter, Facebook, Instagram,  
Public TV, Private TV, Radio, Personal Blog, Twitter, Facebook, Instagram, LinkedIn, Whatsapp  
Public TV, Radio, Internet news site, Personal Blog, Twitter, Instagram, LinkedIn  
Youtube, Twitter, Instagram, LinkedIn  
Radio, Internet news site, Private Meteorological Company, Youtube, Twitter, Facebook, Instagram, LinkedIn, W  
Weather Service, Twitter, Telegram, Whatsapp  
Radio, Printed press, Internet news site, Personal Blog, Twitter, Facebook, Instagram, Telegram, Whatsapp, Sp  
Private TV, Radio, Printed press, Internet news site, Weather Service, Private Meteorological Company, Facebo  
Public TV, Private TV, Radio, Printed press, Internet news site, Weather Service, Private Meteorological Compa  
Radio, Twitter, Facebook, Instagram, LinkedIn, Whatsapp  
Private TV, Internet news site, Weather Service, Twitter, Facebook, Whatsapp  
Public TV, Radio, Twitter, Instagram  
Weather Service, Youtube, Twitter, Facebook, Instagram, Whatsapp  
Public TV, Private TV, Radio, Printed press, Internet news site, Weather Service, Youtube, Twitter, Facebook, Ir  
Radio, Printed press, Internet news site, Personal Blog, Twitter, Facebook  
Twitter, Instagram  
Public TV, Radio, Printed press, Weather Service, Facebook, Instagram  
Radio, Printed press, Internet news site, Twitter, Facebook, Instagram, LinkedIn, Whatsapp  
Public TV, Private TV, Radio, Printed press, Internet news site, Weather Service, Private Meteorological Compa  
Radio, Weather Service, Youtube, Facebook, Whatsapp  
Radio, Printed press, Internet news site, Twitter, Facebook, Instagram, LinkedIn, Whatsapp  
Radio, Printed press, Internet news site, Twitter, Facebook, Instagram, LinkedIn, Whatsapp  
Radio, Internet news site, Private Meteorological Company, Twitter  
Private TV, Radio, Printed press, Internet news site, Twitter, Instagram, Whatsapp  
Facebook, Instagram, Whatsapp  
Twitter  
Youtube, Twitter, Facebook, LinkedIn  
Internet news site, Twitter, Instagram  
Radio, Printed press, Internet news site, Weather Service, Twitter, Facebook, Whatsapp  
Twitter  
Private TV, Twitter, Facebook, Instagram, LinkedIn, Slack  
Radio, Twitter, Facebook

Internet news site, Weather Service, Youtube, Facebook, Instagram, Tik Tok

Public TV, Radio, Internet news site, Youtube, Twitter, Facebook

Private TV, Twitter, Facebook

Radio, Internet news site, Youtube, Twitter, Facebook, Instagram, Whatsapp

Private TV, Radio, Printed press, Internet news site, Youtube, Twitter, Facebook, Instagram, LinkedIn, Whatsapp

Public TV, Radio, Internet news site, Twitter, Facebook, Instagram, Whatsapp

Public TV, Internet news site, Youtube, Twitter, Facebook, Instagram, LinkedIn, Telegram, Whatsapp

Public TV, Radio, Internet news site, Weather Service, Youtube, Twitter, Facebook, Instagram, LinkedIn, Telegram

Public TV, Private TV, Radio, Printed press, Internet news site, Weather Service, Facebook, Instagram, LinkedIn

Weather Service, Twitter, Instagram, LinkedIn, Whatsapp

Radio, Facebook, Instagram

Public TV, Radio, Internet news site, Twitter





| Which is your principal | What degree of knowle | What degree of informæ | What degree of knowle |
|-------------------------|-----------------------|------------------------|-----------------------|
| Meteorology/Atmosphe    | 5                     | 5                      | 5                     |
| Meteorology/Atmosphe    | 5                     | 5                      | 4                     |
| Meteorology/Atmosphe    | 4                     | 4                      | 4                     |
| Meteorology/Atmosphe    | 4                     | 4                      | 5                     |
| Journalism              | 4                     | 3                      | 3                     |
| Meteorology/Atmosphe    | 3                     | 3                      | 2                     |
| Meteorology/Atmosphe    | 2                     | 2                      | 1                     |
| Meteorology/Atmosphe    | 3                     | 3                      | 2                     |
| Other university degree | 4                     | 4                      | 3                     |
| Meteorology/Atmosphe    | 4                     | 4                      | 4                     |
| Other university degree | 4                     | 4                      | 3                     |
| Physics/Maths           | 5                     | 4                      | 3                     |
| Meteorology/Atmosphe    | 3                     | 2                      | 3                     |
| Meteorology/Atmosphe    | 4                     | 2                      | 3                     |
| Meteorology/Atmosphe    | 3                     | 3                      | 3                     |
| Physics/Maths           | 3                     | 4                      | 4                     |
| Meteorology/Atmosphe    | 4                     | 4                      | 4                     |
| Meteorology/Atmosphe    | 4                     | 4                      | 5                     |
| Meteorology/Atmosphe    | 4                     | 4                      | 5                     |
| Social Sciences         | 3                     | 4                      | 3                     |
| Physics/Maths           | 4                     | 4                      | 3                     |
| Meteorology/Atmosphe    | 3                     | 4                      | 3                     |
| Meteorology/Atmosphe    | 5                     | 5                      | 5                     |
| Meteorology/Atmosphe    | 4                     | 4                      | 3                     |
| Meteorology/Atmosphe    | 5                     | 4                      | 4                     |
| Meteorology/Atmosphe    | 5                     | 5                      | 5                     |
| Meteorology/Atmosphe    | 4                     | 3                      | 4                     |
| Meteorology/Atmosphe    | 5                     | 5                      | 1                     |
| Meteorology/Atmosphe    | 5                     | 3                      | 3                     |
| Engineering             | 3                     | 3                      | 3                     |
| Meteorology/Atmosphe    | 4                     | 3                      | 3                     |
| Meteorology/Atmosphe    | 5                     | 5                      | 5                     |
| Engineering             | 4                     | 4                      | 4                     |
| Meteorology/Atmosphe    | 4                     | 4                      | 4                     |
| Meteorology/Atmosphe    | 5                     | 5                      | 4                     |
| Geography/Climatology   | 4                     | 4                      | 3                     |
| Other university degree | 2                     | 4                      | 5                     |
| Meteorology/Atmosphe    | 4                     | 3                      | 4                     |
| Meteorology/Atmosphe    | 4                     | 4                      | 4                     |
| Other university degree | 2                     | 3                      | 2                     |
| Other university degree | 4                     | 3                      | 4                     |
| Journalism              | 4                     | 4                      | 4                     |
| Meteorology/Atmosphe    | 4                     | 4                      | 3                     |
| Human Sciences          | 4                     | 4                      | 4                     |
| Meteorology/Atmosphe    | 4                     | 5                      | 3                     |
| Meteorology/Atmosphe    | 4                     | 4                      | 4                     |
| Meteorology/Atmosphe    | 5                     | 5                      | 5                     |

|                         |   |   |   |
|-------------------------|---|---|---|
| Meteorology/Atmosphe    | 3 | 4 | 3 |
| Physics/Maths           | 3 | 4 | 3 |
| Physics/Maths           | 4 | 3 | 4 |
| Meteorology/Atmosphe    | 4 | 3 | 4 |
| Meteorology/Atmosphe    | 4 | 4 | 3 |
| Meteorology/Atmosphe    | 5 | 5 | 5 |
| Meteorology/Atmosphe    | 4 | 4 | 5 |
| Meteorology/Atmosphe    | 5 | 5 | 4 |
| Meteorology/Atmosphe    | 5 | 5 | 5 |
| Meteorology/Atmosphe    | 5 | 4 | 4 |
| Meteorology/Atmosphe    | 3 | 3 | 3 |
| Meteorology/Atmosphe    | 3 | 3 | 3 |
| Meteorology/Atmosphe    | 5 | 5 | 4 |
| Meteorology/Atmosphe    | 3 | 4 | 3 |
| Meteorology/Atmosphe    | 5 | 5 | 5 |
| Meteorology/Atmosphe    | 4 | 4 | 4 |
| Physics/Maths           | 4 | 4 | 4 |
| Meteorology/Atmosphe    | 3 | 3 | 3 |
| Meteorology/Atmosphe    | 5 | 5 | 4 |
| Meteorology/Atmosphe    | 4 | 4 | 4 |
| Meteorology/Atmosphe    | 4 | 4 | 4 |
| Journalism, Human Sci   | 5 | 3 | 4 |
| Meteorology/Atmosphe    | 4 | 3 | 4 |
| Meteorology/Atmosphe    | 5 | 4 | 4 |
| Meteorology/Atmosphe    | 4 | 4 | 4 |
| Journalism              | 5 | 5 | 5 |
| Journalism              | 3 | 4 | 4 |
| Meteorology/Atmosphe    | 4 | 4 | 5 |
| Engineering, Geograph   | 4 | 4 | 4 |
| Engineering, Geograph   | 4 | 4 | 4 |
| Meteorology/Atmosphe    | 3 | 4 | 4 |
| Meteorology/Atmosphe    | 3 | 4 | 5 |
| Meteorology/Atmosphe    | 4 | 4 | 3 |
| Meteorology/Atmosphe    | 4 | 4 | 4 |
| Meteorology/Atmosphe    | 3 | 3 | 3 |
| Meteorology/Atmosphe    | 5 | 5 | 5 |
| Meteorology/Atmosphe    | 5 | 4 | 4 |
| Meteorology/Atmosphe    | 4 | 3 | 4 |
| Meteorology/Atmosphe    | 5 | 5 | 4 |
| Meteorology/Atmosphe    | 5 | 5 | 4 |
| Meteorology/Atmosphe    | 4 | 4 | 4 |
| Meteorology/Atmosphe    | 4 | 4 | 4 |
| Journalism, Social Scie | 4 | 4 | 4 |
| Meteorology/Atmosphe    | 4 | 5 | 4 |
| Engineering             | 4 | 4 | 3 |
| Geography/Climatology   | 4 | 4 | 4 |
| Meteorology/Atmosphe    | 5 | 5 | 4 |
| Meteorology/Atmosphe    | 5 | 5 | 5 |

|                          |   |   |   |
|--------------------------|---|---|---|
| Journalism, Arts/interpr | 1 | 3 | 3 |
| Meteorology/Atmosphe     | 4 | 4 | 3 |
| Journalism               | 4 | 2 | 2 |
| Meteorology/Atmosphe     | 4 | 4 | 3 |
| Meteorology/Atmosphe     | 5 | 4 | 4 |
| Meteorology/Atmosphe     | 5 | 5 | 5 |
| Meteorology/Atmosphe     | 3 | 3 | 3 |
| Other university degree  | 4 | 3 | 4 |
| Meteorology/Atmosphe     | 4 | 4 | 4 |
| Meteorology/Atmosphe     | 5 | 4 | 4 |
| Physics/Maths            | 4 | 5 | 5 |
| Meteorology/Atmosphe     | 4 | 4 | 4 |
| Meteorology/Atmosphe     | 4 | 4 | 4 |
| Social Sciences          | 3 | 3 | 3 |
| Meteorology/Atmosphe     | 5 | 5 | 5 |
| Physics/Maths            | 5 | 5 | 5 |
| Meteorology/Atmosphe     | 3 | 3 | 3 |
| Physics/Maths            | 5 | 4 | 4 |
| Meteorology/Atmosphe     | 4 | 3 | 3 |
| Other university degree  | 4 | 4 | 3 |
| Journalism               | 4 | 3 | 3 |
| Meteorology/Atmosphe     | 4 | 4 | 4 |
| Meteorology/Atmosphe     | 5 | 5 | 5 |
| Meteorology/Atmosphe     | 4 | 4 | 4 |
| Meteorology/Atmosphe     | 4 | 3 | 3 |
| Meteorology/Atmosphe     | 3 | 3 | 3 |
| Meteorology/Atmosphe     | 4 | 4 | 3 |
| Meteorology/Atmosphe     | 4 | 4 | 4 |
| Meteorology/Atmosphe     | 3 | 4 | 3 |
| Meteorology/Atmosphe     | 4 | 4 | 4 |
| Meteorology/Atmosphe     | 5 | 5 | 4 |
| Meteorology/Atmosphe     | 5 | 4 | 5 |
| Meteorology/Atmosphe     | 4 | 4 | 4 |
| Meteorology/Atmosphe     | 4 | 4 | 5 |
| Other university degree  | 4 | 4 | 4 |
| Meteorology/Atmosphe     | 4 | 5 | 5 |
| Meteorology/Atmosphe     | 5 | 5 | 5 |
| Journalism               | 4 | 5 | 4 |
| Meteorology/Atmosphe     | 4 | 5 | 3 |
| Meteorology/Atmosphe     | 5 | 5 | 5 |
| Meteorology/Atmosphe     | 5 | 4 | 5 |
| Geography/Climatology    | 5 | 5 | 5 |
| Meteorology/Atmosphe     | 5 | 5 | 4 |
| Meteorology/Atmosphe     | 5 | 5 | 5 |
| Meteorology/Atmosphe     | 4 | 5 | 4 |
| Meteorology/Atmosphe     | 5 | 5 | 5 |
| Journalism               | 5 | 5 | 5 |
| Physics/Maths            | 5 | 5 | 4 |



|                       |   |   |   |
|-----------------------|---|---|---|
| Meteorology/Atmosphe  | 4 | 4 | 5 |
| Meteorology/Atmosphe  | 5 | 5 | 5 |
| Meteorology/Atmosphe  | 5 | 5 | 5 |
| Meteorology/Atmosphe  | 5 | 5 | 5 |
| Meteorology/Atmosphe  | 5 | 5 | 5 |
| Meteorology/Atmosphe  | 5 | 5 | 5 |
| Meteorology/Atmosphe  | 5 | 5 | 5 |
| Arts/interpretation   | 5 | 5 | 5 |
| Meteorology/Atmosphe  | 5 | 5 | 5 |
| Meteorology/Atmosphe  | 5 | 5 | 5 |
| Meteorology/Atmosphe  | 5 | 5 | 4 |
| Meteorology/Atmosphe  | 4 | 4 | 5 |
| Meteorology/Atmosphe  | 4 | 4 | 4 |
| Meteorology/Atmosphe  | 5 | 5 | 5 |
| Meteorology/Atmosphe  | 5 | 5 | 5 |
| Meteorology/Atmosphe  | 5 | 4 | 5 |
| Meteorology/Atmosphe  | 5 | 5 | 5 |
| Meteorology/Atmosphe  | 5 | 5 | 5 |
| Meteorology/Atmosphe  | 5 | 5 | 5 |
| Meteorology/Atmosphe  | 4 | 4 | 4 |
| Geography/Climatology | 5 | 5 | 5 |
| Meteorology/Atmosphe  | 4 | 4 | 4 |
| Journalism            | 3 | 3 | 5 |
| Geography/Climatology | 4 | 4 | 4 |
| Meteorology/Atmosphe  | 5 | 5 | 5 |
| Meteorology/Atmosphe  | 5 | 5 | 5 |
| Meteorology/Atmosphe  | 4 | 4 | 3 |
| Physics/Maths         | 4 | 5 | 3 |
| Journalism            | 3 | 4 | 5 |
| Journalism            | 4 | 5 | 4 |
| Journalism            | 4 | 4 | 5 |
| Geography/Climatology | 4 | 4 | 4 |
| Meteorology/Atmosphe  | 5 | 5 | 3 |
| Meteorology/Atmosphe  | 4 | 4 | 4 |
| Meteorology/Atmosphe  | 5 | 5 | 5 |
| Meteorology/Atmosphe  | 5 | 5 | 5 |
| Geography/Climatology | 5 | 5 | 5 |
| Geography/Climatology | 5 | 5 | 5 |
| Meteorology/Atmosphe  | 5 | 5 | 5 |
| Journalism            | 4 | 4 | 4 |
| Human Sciences        | 4 | 4 | 4 |
| Geography/Climatology | 4 | 4 | 4 |
| Meteorology/Atmosphe  | 5 | 5 | 4 |
| Meteorology/Atmosphe  | 4 | 4 | 4 |
| Meteorology/Atmosphe  | 3 | 4 | 3 |
| Meteorology/Atmosphe  | 5 | 5 | 5 |
| Meteorology/Atmosphe  | 5 | 5 | 5 |
| Meteorology/Atmosphe  | 5 | 5 | 5 |

|                          |   |   |   |
|--------------------------|---|---|---|
| Arts/interpretation      | 4 | 3 | 4 |
| Meteorology/Atmosphe     | 5 | 5 | 5 |
| Meteorology/Atmosphe     | 5 | 5 | 5 |
| Meteorology/Atmosphe     | 4 | 5 | 4 |
| Physics/Maths, Journal   | 5 | 5 | 5 |
| Meteorology/Atmosphe     | 4 | 4 | 4 |
| Meteorology/Atmosphe     | 5 | 5 | 5 |
| Meteorology/Atmosphe     | 5 | 5 | 4 |
| Meteorology/Atmosphe     | 4 | 2 | 3 |
| Meteorology/Atmosphe     | 5 | 5 | 4 |
| Journalism, Arts/interpr | 4 | 5 | 4 |
| Meteorology/Atmosphe     | 5 | 5 | 3 |

|    |    |    |
|----|----|----|
| 1  | 0  | 2  |
| 3  | 5  | 4  |
| 26 | 31 | 47 |
| 92 | 88 | 82 |
| 81 | 79 | 68 |





How much do you agree with the phrase: Climate Change is The climate in my area The impacts of climate

|   |   |   |
|---|---|---|
| 1 | 2 | 4 |
| 5 | 4 | 2 |
| 3 | 2 | 3 |
| 1 | 4 | 2 |
| 3 | 4 | 4 |
| 1 | 3 | 4 |
| 1 | 4 | 4 |
| 1 | 4 | 4 |
| 1 | 4 | 3 |
| 2 | 3 | 3 |
| 1 | 3 | 3 |
| 1 | 4 | 3 |
| 1 | 3 | 4 |
| 1 | 5 | 4 |
| 1 | 4 | 4 |
| 1 | 3 | 3 |
| 1 | 3 | 2 |
| 1 | 4 | 4 |
| 1 | 4 | 4 |
| 1 | 4 | 4 |
| 1 | 2 | 1 |
| 1 | 5 | 3 |
| 1 | 5 | 5 |
| 1 | 5 | 4 |
| 3 | 3 | 5 |
| 4 | 4 | 3 |
| 1 | 5 | 4 |
| 1 | 5 | 4 |
| 3 | 5 | 3 |
| 1 | 4 | 5 |
| 1 | 4 | 4 |
| 1 | 5 | 5 |
| 4 | 4 | 4 |
| 1 | 4 | 3 |
| 5 | 4 | 4 |
| 1 | 4 | 4 |
| 3 | 5 | 4 |
| 1 | 4 | 4 |
| 2 | 5 | 3 |
| 1 | 4 | 4 |
| 1 | 4 | 3 |
| 1 | 5 | 5 |
| 1 | 5 | 5 |
| 4 | 4 | 3 |
| 1 | 5 | 4 |
| 1 | 4 | 3 |
| 1 | 4 | 2 |

|   |   |   |
|---|---|---|
| 1 | 3 | 3 |
| 1 | 4 | 3 |
| 4 | 4 | 2 |
| 1 | 4 | 3 |
| 1 | 4 | 3 |
| 1 | 5 | 5 |
| 1 | 4 | 3 |
| 1 | 4 | 4 |
| 1 | 4 | 1 |
| 1 | 5 | 4 |
| 1 | 4 | 4 |
| 1 | 4 | 4 |
| 1 | 5 | 4 |
| 1 | 5 | 5 |
| 1 | 4 | 5 |
| 1 | 4 | 5 |
| 1 | 5 | 5 |
| 1 | 5 | 4 |
| 1 | 4 | 3 |
| 4 | 4 | 4 |
| 1 | 4 | 4 |
| 1 | 5 | 5 |
| 1 | 5 | 5 |
| 1 | 5 | 3 |
| 1 | 5 | 3 |
| 1 | 5 | 5 |
| 1 | 4 | 2 |
| 1 | 5 | 5 |
| 4 | 4 | 4 |
| 4 | 4 | 4 |
| 1 | 4 | 2 |
| 1 | 5 | 5 |
| 1 | 5 | 4 |
| 1 | 5 | 5 |
| 1 | 4 | 4 |
| 2 | 3 | 3 |
| 1 | 5 | 5 |
| 1 | 5 | 3 |
| 1 | 3 | 3 |
| 1 | 5 | 4 |
| 1 | 5 | 2 |
| 1 | 4 | 4 |
| 1 | 5 | 5 |
| 1 | 4 | 4 |
| 3 | 5 | 1 |
| 4 | 4 | 3 |
| 1 | 4 | 4 |
| 1 | 5 | 3 |

[illegible]

4  
5  
3  
4  
5  
5  
4  
4  
4  
5  
4  
5  
4  
5  
5  
4  
4  
5  
3  
4  
4  
5  
5  
4  
4  
4  
4  
4  
2  
5  
5  
5  
3  
5  
5  
5  
5  
5  
4  
5  
5  
5  
5  
4

5  
3  
4  
3  
4  
4  
4  
3  
3  
5  
4  
1  
3  
4  
3  
4  
4  
3  
3  
5  
5  
3  
4  
3  
5  
2  
5  
5  
5  
4  
4  
5  
4  
5  
5  
3  
5  
1  
5  
3  
5  
3  
5  
5  
5

|   |   |   |
|---|---|---|
| 1 | 5 | 4 |
| 1 | 5 | 4 |
| 1 | 4 | 2 |
| 1 | 5 | 5 |
| 1 | 5 | 5 |
| 1 | 5 | 4 |
| 1 | 5 | 5 |
| 1 | 4 | 3 |
| 1 | 5 | 5 |
| 1 | 5 | 5 |
| 1 | 5 | 3 |
| 1 | 4 | 4 |
| 3 | 3 | 3 |
| 1 | 5 | 3 |
| 1 | 5 | 5 |
| 1 | 5 | 5 |
| 1 | 5 | 4 |
| 1 | 3 | 3 |
| 1 | 5 | 4 |
| 1 | 4 | 4 |
| 1 | 5 | 4 |
| 1 | 4 | 4 |
| 1 | 5 | 5 |
| 1 | 5 | 5 |
| 1 | 5 | 4 |
| 1 | 4 | 4 |
| 1 | 4 | 4 |
| 1 | 5 | 4 |
| 1 | 4 | 4 |
| 1 | 4 | 3 |
| 1 | 4 | 4 |
| 1 | 4 | 1 |
| 1 | 4 | 5 |
| 1 | 5 | 3 |
| 1 | 5 | 5 |
| 1 | 5 | 5 |
| 1 | 5 | 4 |
| 1 | 5 | 4 |
| 1 | 5 | 4 |
| 1 | 5 | 4 |
| 1 | 5 | 5 |
| 1 | 5 | 4 |
| 1 | 5 | 4 |
| 1 | 3 | 3 |
| 3 | 3 | 4 |
| 1 | 5 | 1 |
| 1 | 4 | 4 |
| 1 | 5 | 4 |



|   |   |   |
|---|---|---|
| 1 | 4 | 5 |
| 1 | 5 | 5 |
| 5 | 5 | 5 |
| 1 | 5 | 5 |
| 1 | 4 | 4 |
| 1 | 5 | 4 |
| 1 | 5 | 5 |
| 1 | 3 | 3 |
| 1 | 5 | 3 |
| 1 | 5 | 5 |
| 1 | 5 | 1 |
| 1 | 4 | 4 |

|     |    |    |
|-----|----|----|
| 175 | 0  | 8  |
| 4   | 4  | 10 |
| 11  | 18 | 52 |
| 10  | 82 | 78 |
| 3   | 99 | 55 |

3,9  
4,9  
25,6  
38,4  
27,1





Some effects of Climate Change: When speaking about ( Have you ever read any

|              |                   |
|--------------|-------------------|
| 5 Concerned  | Yes               |
| 4 Cautious   | Yes               |
| 3 Cautious   | Yes               |
| 1 Concerned  | No                |
| 4 Alarmed    | Yes               |
| 4 Alarmed    | Yes               |
| 5 Concerned  | No                |
| 5 Cautious   | No                |
| 4 Alarmed    | Yes               |
| 3 Cautious   | No                |
| 2 Cautious   | No                |
| 4 Concerned  | Yes               |
| 4 Alarmed    | Yes               |
| 5 Concerned  | No                |
| 5 Concerned  | Yes               |
| 5 Concerned  | Yes               |
| 4 Concerned  | Yes               |
| 4 Concerned  | Yes               |
| 4 Concerned  | Yes               |
| 5 Concerned  | Yes               |
| 3 Concerned  | Yes               |
| 4 Concerned  | Yes               |
| 5 Concerned  | Yes               |
| 5 Concerned  | Yes               |
| 5 Concerned  | Yes               |
| 4 Concerned  | Yes               |
| 2 Concerned  | Yes               |
| 3 Concerned  | Yes               |
| 4 Cautious   | Yes               |
| 4 Concerned  | Yes               |
| 5 Alarmed    | Yes               |
| 3 Alarmed    | No                |
| 4 Alarmed    | Yes               |
| 5 Concerned  | Yes               |
| 4 Alarmed    | Yes               |
| 4 Concerned  | Yes               |
| 4 Alarmed    | I don't know them |
| 5 Concerned  | Yes               |
| 4 Disengaged | Yes               |
| 4 Cautious   | I don't know them |
| 4 Cautious   | No                |
| 3 Concerned  | Yes               |
| 4 Alarmed    | Yes               |
| 3 Cautious   | No                |
| 4 Concerned  | Yes               |
| 4 Concerned  | Yes               |
| 5 Concerned  | Yes               |

|              |     |
|--------------|-----|
| 5 Concerned  | Yes |
| 3 Concerned  | Yes |
| 4 Alarmed    | No  |
| 5 Alarmed    | Yes |
| 5 Concerned  | Yes |
| 5 Concerned  | Yes |
| 4 Concerned  | Yes |
| 4 Concerned  | Yes |
| 2 Concerned  | Yes |
| 3 Alarmed    | Yes |
| 2 Alarmed    | Yes |
| 2 Alarmed    | Yes |
| 4 Concerned  | Yes |
| 3 Alarmed    | Yes |
| 5 Concerned  | Yes |
| 3 Concerned  | Yes |
| 2 Alarmed    | Yes |
| 5 Concerned  | No  |
| 5 Concerned  | Yes |
| 3 Concerned  | Yes |
| 4 Concerned  | Yes |
| 5 Alarmed    | Yes |
| 4 Concerned  | Yes |
| 4 Concerned  | Yes |
| 5 Concerned  | Yes |
| 5 Alarmed    | Yes |
| 4 Concerned  | Yes |
| 3 Concerned  | Yes |
| 4 Alarmed    | Yes |
| 4 Alarmed    | Yes |
| 5 Concerned  | Yes |
| 4 Concerned  | Yes |
| 5 Concerned  | Yes |
| 4 Concerned  | Yes |
| 5 Concerned  | Yes |
| 3 Cautious   | Yes |
| 3 Concerned  | Yes |
| 4 Concerned  | Yes |
| 2 Concerned  | Yes |
| 4 Concerned  | Yes |
| 4 Concerned  | Yes |
| 4 Concerned  | Yes |
| 5 Concerned  | Yes |
| 3 Disengaged | Yes |
| 3 Concerned  | Yes |
| 4 Concerned  | Yes |
| 5 Concerned  | Yes |
| 2 Alarmed    | Yes |

|             |     |
|-------------|-----|
| 5 Concerned | Yes |
| 4 Concerned | No  |
| 5 Concerned | No  |
| 3 Cautious  | No  |
| 4 Concerned | Yes |
| 5 Concerned | Yes |
| 3 Concerned | Yes |
| 5 Concerned | Yes |
| 4 Alarmed   | Yes |
| 4 Concerned | Yes |
| 3 Alarmed   | No  |
| 3 Concerned | Yes |
| 2 Concerned | Yes |
| 5 Concerned | Yes |
| 4 Concerned | Yes |
| 5 Concerned | Yes |
| 5 Concerned | Yes |
| 4 Concerned | Yes |
| 4 Alarmed   | Yes |
| 5 Concerned | Yes |
| 4 Alarmed   | No  |
| 4 Concerned | Yes |
| 3 Cautious  | Yes |
| 4 Concerned | Yes |
| 5 Concerned | Yes |
| 2 Concerned | Yes |
| 4 Alarmed   | Yes |
| 4 Concerned | Yes |
| 1 Alarmed   | Yes |
| 4 Concerned | Yes |
| 3 Concerned | Yes |
| 3 Concerned | Yes |
| 2 Concerned | Yes |
| 4 Concerned | Yes |
| 5 Alarmed   | Yes |
| 4 Concerned | Yes |
| 4 Concerned | Yes |
| 3 Concerned | Yes |
| 4 Concerned | Yes |
| 4 Concerned | Yes |
| 4 Concerned | Yes |
| 3 Alarmed   | Yes |
| 4 Concerned | Yes |
| 4 Concerned | Yes |
| 4 Concerned | Yes |

|             |     |
|-------------|-----|
| 4 Concerned | Yes |
| 5 Alarmed   | Yes |
| 3 Alarmed   | Yes |
| 4 Concerned | Yes |
| 4 Alarmed   | Yes |
| 5 Concerned | Yes |
| 3 Cautious  | Yes |
| 5 Concerned | No  |
| 4 Alarmed   | Yes |
| 5 Alarmed   | Yes |
| 4 Concerned | Yes |
| 4 Concerned | Yes |
| 3 Cautious  | Yes |
| 4 Alarmed   | Yes |
| 2 Alarmed   | Yes |
| 4 Concerned | Yes |
| 5 Concerned | Yes |
| 4 Cautious  | Yes |
| 4 Concerned | Yes |
| 1 Alarmed   | Yes |
| 4 Concerned | Yes |
| 4 Concerned | Yes |
| 5 Concerned | Yes |
| 3 Alarmed   | Yes |
| 5 Alarmed   | Yes |
| 3 Concerned | Yes |
| 4 Alarmed   | Yes |
| 3 Concerned | Yes |
| 4 Alarmed   | Yes |
| 3 Alarmed   | Yes |
| 4 Concerned | Yes |
| 5 Concerned | Yes |
| 5 Concerned | Yes |
| 5 Concerned | Yes |
| 3 Concerned | Yes |
| 5 Alarmed   | Yes |
| 4 Concerned | Yes |
| 4 Concerned | Yes |
| 2 Concerned | Yes |
| 5 Concerned | Yes |
| 4 Alarmed   | Yes |
| 2 Concerned | Yes |
| 4 Concerned | Yes |
| 5 Concerned | Yes |
| 3 Concerned | Yes |
| 5 Concerned | Yes |
| 5 Concerned | Yes |
| 5 Concerned | Yes |

|             |     |
|-------------|-----|
| 5 Concerned | Yes |
| 4 Alarmed   | Yes |
| 4 Alarmed   | Yes |
| 5 Concerned | No  |
| 4 Concerned | Yes |
| 5 Concerned | Yes |
| 5 Alarmed   | Yes |
| 4 Concerned | Yes |
| 5 Concerned | No  |

|    |
|----|
| 3  |
| 14 |
| 35 |
| 88 |
| 63 |







Which of the following IPCC reports do you recall consulting?

IPCC AR5 2014

IPCC AR4 2007, IPCC AR5 2014, SPECIAL REPORT GLOBAL WARMING OF 1,5°C

None of them

SPECIAL REPORT GLOBAL WARMING OF 1,5°C

IPCC AR4 2007

IPCC AR5 2014

None of them

None of them

IPCC AR4 2007, IPCC AR5 2014

None of them

None of them

IPCC AR4 2007

SPECIAL REPORT GLOBAL WARMING OF 1,5°C

None of them

IPCC TAR 2001, IPCC AR4 2007

IPCC AR4 2007, IPCC AR5 2014, SPECIAL REPORT GLOBAL WARMING OF 1,5°C

IPCC AR5 2014

IPCC AR5 2014

IPCC AR5 2014

IPCC AR5 2014, SPECIAL REPORT GLOBAL WARMING OF 1,5°C

IPCC FAR 1990, IPCC SAR 1995, IPCC TAR 2001, IPCC AR4 2007, IPCC AR5 2014, SPECIAL REPORT

SPECIAL REPORT GLOBAL WARMING OF 1,5°C

IPCC AR4 2007, IPCC AR5 2014

IPCC AR4 2007, IPCC AR5 2014, SPECIAL REPORT GLOBAL WARMING OF 1,5°C

IPCC SAR 1995, IPCC AR4 2007, IPCC AR5 2014, SPECIAL REPORT GLOBAL WARMING OF 1,5°C

IPCC AR5 2014

IPCC TAR 2001, IPCC AR4 2007, IPCC AR5 2014, SPECIAL REPORT GLOBAL WARMING OF 1,5°C

IPCC AR5 2014, SPECIAL REPORT GLOBAL WARMING OF 1,5°C

IPCC SAR 1995, IPCC AR5 2014, SPECIAL REPORT GLOBAL WARMING OF 1,5°C

IPCC AR5 2014, SPECIAL REPORT GLOBAL WARMING OF 1,5°C

IPCC TAR 2001, IPCC AR5 2014, SPECIAL REPORT GLOBAL WARMING OF 1,5°C

None of them

SPECIAL REPORT GLOBAL WARMING OF 1,5°C

IPCC TAR 2001

IPCC AR4 2007, IPCC AR5 2014

SPECIAL REPORT GLOBAL WARMING OF 1,5°C

SPECIAL REPORT GLOBAL WARMING OF 1,5°C

IPCC AR5 2014, SPECIAL REPORT GLOBAL WARMING OF 1,5°C

IPCC AR4 2007, IPCC AR5 2014, SPECIAL REPORT GLOBAL WARMING OF 1,5°C

None of them

None of them

SPECIAL REPORT GLOBAL WARMING OF 1,5°C

IPCC FAR 1990

None of them

IPCC FAR 1990, IPCC SAR 1995, IPCC TAR 2001, IPCC AR4 2007, IPCC AR5 2014, SPECIAL REPORT

IPCC AR4 2007, IPCC AR5 2014, SPECIAL REPORT GLOBAL WARMING OF 1,5°C

SPECIAL REPORT GLOBAL WARMING OF 1,5°C

IPCC FAR 1990, IPCC SAR 1995, IPCC TAR 2001, IPCC AR4 2007, IPCC AR5 2014, SPECIAL REPORT  
None of them

None of them

IPCC AR5 2014, SPECIAL REPORT GLOBAL WARMING OF 1,5°C

IPCC AR5 2014

IPCC TAR 2001, IPCC AR4 2007, IPCC AR5 2014, SPECIAL REPORT GLOBAL WARMING OF 1,5°C

IPCC SAR 1995, IPCC TAR 2001, IPCC AR4 2007, IPCC AR5 2014, SPECIAL REPORT GLOBAL WA

IPCC AR5 2014

IPCC AR5 2014, SPECIAL REPORT GLOBAL WARMING OF 1,5°C

None of them

IPCC AR5 2014

IPCC AR4 2007, SPECIAL REPORT GLOBAL WARMING OF 1,5°C

IPCC AR5 2014, SPECIAL REPORT GLOBAL WARMING OF 1,5°C

IPCC AR5 2014, SPECIAL REPORT GLOBAL WARMING OF 1,5°C

IPCC AR5 2014, SPECIAL REPORT GLOBAL WARMING OF 1,5°C

IPCC AR5 2014

SPECIAL REPORT GLOBAL WARMING OF 1,5°C

SPECIAL REPORT GLOBAL WARMING OF 1,5°C

IPCC SAR 1995, IPCC AR4 2007, IPCC AR5 2014, SPECIAL REPORT GLOBAL WARMING OF 1,5°C

IPCC AR5 2014, SPECIAL REPORT GLOBAL WARMING OF 1,5°C

IPCC AR5 2014, SPECIAL REPORT GLOBAL WARMING OF 1,5°C

IPCC AR5 2014, SPECIAL REPORT GLOBAL WARMING OF 1,5°C

IPCC AR5 2014

IPCC AR5 2014

SPECIAL REPORT GLOBAL WARMING OF 1,5°C

SPECIAL REPORT GLOBAL WARMING OF 1,5°C

IPCC AR5 2014

IPCC TAR 2001, IPCC AR4 2007, IPCC AR5 2014, SPECIAL REPORT GLOBAL WARMING OF 1,5°C

IPCC FAR 1990, IPCC SAR 1995, IPCC TAR 2001, IPCC AR4 2007, IPCC AR5 2014, SPECIAL REP

IPCC AR4 2007, IPCC AR5 2014, SPECIAL REPORT GLOBAL WARMING OF 1,5°C

IPCC AR5 2014, SPECIAL REPORT GLOBAL WARMING OF 1,5°C

SPECIAL REPORT GLOBAL WARMING OF 1,5°C

SPECIAL REPORT GLOBAL WARMING OF 1,5°C

IPCC AR5 2014, SPECIAL REPORT GLOBAL WARMING OF 1,5°C

IPCC AR4 2007, IPCC AR5 2014, SPECIAL REPORT GLOBAL WARMING OF 1,5°C

IPCC AR5 2014, SPECIAL REPORT GLOBAL WARMING OF 1,5°C

IPCC AR4 2007, IPCC AR5 2014, SPECIAL REPORT GLOBAL WARMING OF 1,5°C

IPCC AR5 2014, SPECIAL REPORT GLOBAL WARMING OF 1,5°C

IPCC FAR 1990, IPCC SAR 1995, IPCC TAR 2001, IPCC AR5 2014, SPECIAL REPORT GLOBAL W/

SPECIAL REPORT GLOBAL WARMING OF 1,5°C

None of them

None of them

SPECIAL REPORT GLOBAL WARMING OF 1,5°C

IPCC AR5 2014, SPECIAL REPORT GLOBAL WARMING OF 1,5°C

IPCC TAR 2001, IPCC AR4 2007, IPCC AR5 2014, SPECIAL REPORT GLOBAL WARMING OF 1,5°C

## SPECIAL REPORT GLOBAL WARMING OF 1,5°C

IPCC AR5 2014, SPECIAL REPORT GLOBAL WARMING OF 1,5°C

SPECIAL REPORT GLOBAL WARMING OF 1,5°C

IPCC FAR 1990, IPCC SAR 1995, IPCC TAR 2001, IPCC AR4 2007, IPCC AR5 2014, SPECIAL REP(

IPCC FAR 1990, IPCC SAR 1995, IPCC TAR 2001, IPCC AR4 2007, IPCC AR5 2014, SPECIAL REP(

IPCC AR4 2007, IPCC AR5 2014, SPECIAL REPORT GLOBAL WARMING OF 1,5°C

IPCC TAR 2001, IPCC AR4 2007

None of them

IPCC SAR 1995, IPCC TAR 2001, IPCC AR4 2007, IPCC AR5 2014, SPECIAL REPORT GLOBAL W/

IPCC FAR 1990, IPCC SAR 1995, IPCC TAR 2001, IPCC AR4 2007, IPCC AR5 2014, SPECIAL REP(

SPECIAL REPORT GLOBAL WARMING OF 1,5°C

IPCC AR5 2014, SPECIAL REPORT GLOBAL WARMING OF 1,5°C

SPECIAL REPORT GLOBAL WARMING OF 1,5°C

SPECIAL REPORT GLOBAL WARMING OF 1,5°C

None of them

IPCC AR5 2014, SPECIAL REPORT GLOBAL WARMING OF 1,5°C

IPCC TAR 2001, IPCC AR4 2007, IPCC AR5 2014, SPECIAL REPORT GLOBAL WARMING OF 1.5°C

None of them

SPECIAL REPORT GLOBAL WARMING OF 1,5°C

IPCC AR5 2014, SPECIAL REPORT GLOBAL WARMING OF 1.5°C

IPCC AR5 2014, SPECIAL REPORT GLOBAL WARMING OF 1,5°C

IPCC AR5 2014, SPECIAL REPORT GLOBAL WARMING OF 1.5°C

IPCC AR5 2014

IPCC AR4 2007, IPCC AR5 2014, SPECIAL REPORT GLOBAL WARMING OF 1.5°C

IPCC AR4 2007, IPCC AR5 2014

IPCC TAR 2001, IPCC AR4 2007, IPCC AR5 2014, SPECIAL REPORT GLOBAL WARMING OF 1,5°C

IPCC AR5 2014, SPECIAL REPORT GLOBAL WARMING OF 1.5°C

SPECIAL REPORT GLOBAL WARMING OF 1,5°C

IPCC AR4 2007, IPCC AR5 2014, SPECIAL REPORT GLOBAL WARMING OF 1,5°C

IPCC TAR 2001, IPCC AR4 2007, IPCC AR5 2014, SPECIAL REPORT GLOBAL WARMING OF 1.5°C

IPCC FAR 1990, IPCC SAR 1995, IPCC TAR 2001, IPCC AR4 2007, IPCC AR5 2014, SPECIAL REP

SPECIAL REPORT GLOBAL WARMING OF 1.5°C

IPCC AR5 2014. SPECIAL REPORT GLOBAL WARMING OF 1.5°C

IPCC AR4 2007, IPCC AR5 2014, SPECIAL REPORT GLOBAL WARMING OF 1.5°C

IPCC FAR 1990, IPCC AR5 2014, SPECIAL REPORT GLOBAL WARMING OF 1,5°C

IPCC AR4 2007, IPCC AR5 2014, SPECIAL REPORT GLOBAL WARMING OF 1.5°C

IPCC AR5 2014, SPECIAL REPORT GLOBAL WARMING OF 1.5°C

IPCC AR4 2007. IPCC AR5 2014. SPECIAL REPORT GLOBAL WARMING OF 1.5°C

SPECIAL REPORT GLOBAL WARMING OF 1.5°C

IPCC AR5 2014. SPECIAL REPORT GLOBAL WARMING OF 1.5°C

IPCC AR5 2014. SPECIAL REPORT GLOBAL WARMING OF 1.5°C

IPCC TAR 2001, IPCC AR4 2007, IPCC AR5 2014, SPECIAL REPORT GLOBAL WARMING OF 1.5°C

IPCC AR5 2014, SPECIAL REPORT GLOBAL WARMING OF 1,5°C  
IPCC AR5 2014

IPCC AR4 2007, IPCC AR5 2014, SPECIAL REPORT GLOBAL WARMING OF 1,5°C  
SPECIAL REPORT GLOBAL WARMING OF 1,5°C

IPCC AR4 2007, IPCC AR5 2014

IPCC AR5 2014

IPCC SAR 1995, IPCC AR5 2014, SPECIAL REPORT GLOBAL WARMING OF 1,5°C

IPCC AR4 2007, IPCC AR5 2014, SPECIAL REPORT GLOBAL WARMING OF 1.5°C

IPCC AR4 2007, IPCC AR5 2014, SPECIAL REPORT GLOBAL WARMING OF 1,5°C

IPCC AR5 2014, SPECIAL REPORT GLOBAL WARMING OF 1,5°C

IPCC AR5 2014, SPECIAL REPORT GLOBAL WARMING OF 1,5°C

IPCC AR5 2014, SPECIAL REPORT GLOBAL WARMING OF 1,5°C

IPCC AR5 2014

IPCC AR5 2014, SPECIAL REPORT GLOBAL WARMING OF 1.5°C

IPCC AR5 2014, SPECIAL REPORT GLOBAL WARMING OF 1.5°C

IPCC AR4 2007, IPCC AR5 2014, SPECIAL REPORT GLOBAL WARMING OF 1,5°C

IPCC AR5 2014, SPECIAL REPORT GLOBAL WARMING OF 1,5°C

SPECIAL REPORT GLOBAL WARMING OF 1,5°C

SPECIAL REPORT GLOBAL WARMING OF 1,5°C

IPCC AR5 2014, SPECIAL REPORT GLOBAL WARMING OF 1,5°C

SPECIAL REPORT GLOBAL WARMING OF 1,5°C

SPECIAL REPORT GLOBAL WARMING OF 1,5°C

IPCC AR5 2014, SPECIAL REPORT GLOBAL WARMING OF 1,5°C

IPCC AR5 2014, SPECIAL REPORT GLOBAL WARMING OF 1,5°C

IPCC TAR 2001, IPCC AR4 2007, IPCC AR5 2014, SPECIAL REPORT GLOBAL WARMING OF 1,5°C

IPCC TAR 2001, IPCC AR4 2007, IPCC AR5 2014, SPECIAL REPORT GLOBAL WARMING OF 1,5°C

IPCC TAR 2001, IPCC AR4 2007, IPCC AR5 2014, SPECIAL REPORT GLOBAL WARMING OF 1,5°C

IPCC AR4 2007, IPCC AR5 2014, SPECIAL REPORT GLOBAL WARMING OF 1,5°C

IPCC AR5 2014, SPECIAL REPORT GLOBAL WARMING OF 1,5°C

None of them

IPCC AR5 2014, SPECIAL REPORT GLOBAL WARMING OF 1,5°C

IPCC FAR 1990, IPCC SAR 1995, IPCC TAR 2001, IPCC AR4 2007, IPCC AR5 2014, SPECIAL REPORT

SPECIAL REPORT GLOBAL WARMING OF 1,5°C

IPCC TAR 2001, SPECIAL REPORT GLOBAL WARMING OF 1,5°C

SPECIAL REPORT GLOBAL WARMING OF 1.5°C

SPECIAL REPORT GLOBAL WARMING OF 1.5°C

SPECIAL REPORT GLOBAL WARMING OF 1.5°C

SPECIAL REPORT GLOBAL WARMING OF 1,5°C

IPCC SAR 1995, IPCC TAR 2001, IPCC AR4 2007, IPCC AR5 2014, SPECIAL REPORT GLOBAL W/

IPCC AR4 2007, IPCC AR5 2014, SPECIAL REPORT GLOBAL WARMING OF 1,5°C

None of them

IPCC FAR 1990, IPCC SAR 1995, IPCC TAR 2001, IPCC AR4 2007, IPCC AR5 2014, SPECIAL REP(

IPCC AR5 2014, SPECIAL REPORT GLOBAL WARMING OF 1,5°C

IPCC FAR 1990, IPCC SAR 1995, IPCC TAR 2001, IPCC AR4 2007, IPCC AR5 2014, SPECIAL REP(

IPCC TAR 2001, IPCC AR4 2007, IPCC AR5 2014, SPECIAL REPORT GLOBAL WARMING OF 1,5°C

SPECIAL REPORT GLOBAL WARMING OF 1,5°C

IPCC AR4 2007, IPCC AR5 2014, SPECIAL REPORT GLOBAL WARMING OF 1,5°C

SPECIAL REPORT GLOBAL WARMING OF 1,5°C

IPCC TAR 2001, SPECIAL REPORT GLOBAL WARMING OF 1,5°C







| Regarding the process of preparation, writing and a | Regarding the process | Regarding the process |
|-----------------------------------------------------|-----------------------|-----------------------|
| 4                                                   | 4                     | 2                     |
| 3                                                   | 4                     | 3                     |
| 3                                                   | 2                     | 2                     |
| 1                                                   | 5                     | 2                     |
| 4                                                   | 3                     | 3                     |
| 2                                                   | 4                     | 2                     |
| 3                                                   | 4                     | 1                     |
| 2                                                   | 5                     | 4                     |
| 1                                                   | 5                     | 2                     |
| 2                                                   | 2                     | 2                     |
| 1                                                   | 1                     | 2                     |
| 3                                                   | 5                     | 3                     |
| 3                                                   | 4                     | 2                     |
| 2                                                   | 3                     | 2                     |
| 2                                                   | 5                     | 3                     |
| 2                                                   | 3                     | 4                     |
| 3                                                   | 4                     | 4                     |
| 1                                                   | 3                     | 3                     |
| 1                                                   | 3                     | 3                     |
| 2                                                   | 3                     | 3                     |
| 3                                                   | 5                     | 3                     |
| 3                                                   | 4                     | 4                     |
| 2                                                   | 5                     | 2                     |
| 2                                                   | 5                     | 2                     |
| 3                                                   | 3                     | 2                     |
| 3                                                   | 2                     | 2                     |
| 4                                                   | 4                     | 2                     |
| 2                                                   | 5                     | 2                     |
| 4                                                   | 4                     | 2                     |
| 1                                                   | 5                     | 3                     |
| 2                                                   | 4                     | 3                     |
| 3                                                   | 4                     | 3                     |
| 4                                                   | 4                     | 4                     |
| 2                                                   | 4                     | 3                     |
| 3                                                   | 3                     | 2                     |
| 2                                                   | 5                     | 4                     |
| 1                                                   | 2                     | 2                     |
| 2                                                   | 5                     | 3                     |
| 3                                                   | 4                     | 3                     |
| 4                                                   | 4                     | 3                     |
| 2                                                   | 3                     | 4                     |
| 3                                                   | 3                     | 2                     |
| 2                                                   | 4                     | 4                     |
| 4                                                   | 4                     | 3                     |
| 1                                                   | 3                     | 2                     |
| 2                                                   | 4                     | 4                     |
| 1                                                   | 1                     | 2                     |

|  |   |   |   |
|--|---|---|---|
|  | 3 | 3 | 2 |
|  | 2 | 5 | 4 |
|  | 3 | 4 | 3 |
|  | 3 | 4 | 4 |
|  | 2 | 5 | 3 |
|  | 4 | 5 | 4 |
|  | 3 | 4 | 3 |
|  | 1 | 1 | 3 |
|  | 3 | 4 | 3 |
|  | 1 | 4 | 2 |
|  | 4 | 5 | 3 |
|  | 4 | 5 | 3 |
|  | 2 | 4 | 1 |
|  | 5 | 3 | 5 |
|  | 2 | 4 | 1 |
|  | 1 | 1 | 2 |
|  | 4 | 5 | 4 |
|  | 3 | 3 | 1 |
|  | 4 | 5 | 3 |
|  | 2 | 3 | 4 |
|  | 2 | 4 | 3 |
|  | 3 | 4 | 3 |
|  | 1 | 5 | 4 |
|  | 3 | 4 | 2 |
|  | 2 | 4 | 1 |
|  | 1 | 4 | 3 |
|  | 2 | 4 | 2 |
|  | 3 | 4 | 4 |
|  | 3 | 3 | 1 |
|  | 3 | 3 | 1 |
|  | 4 | 4 | 4 |
|  | 2 | 4 | 3 |
|  | 3 | 5 | 3 |
|  | 2 | 4 | 2 |
|  | 3 | 5 | 3 |
|  | 5 | 5 | 1 |
|  | 2 | 4 | 3 |
|  | 2 | 4 | 3 |
|  | 2 | 4 | 3 |
|  | 2 | 4 | 4 |
|  | 4 | 4 | 2 |
|  | 1 | 5 | 2 |
|  | 2 | 5 | 2 |
|  | 4 | 5 | 4 |
|  | 2 | 4 | 3 |
|  | 2 | 4 | 3 |
|  | 2 | 5 | 4 |
|  | 2 | 4 | 3 |

|  |   |   |   |
|--|---|---|---|
|  | 3 | 4 | 3 |
|  | 3 | 5 | 2 |
|  | 3 | 3 | 3 |
|  | 4 | 3 | 2 |
|  | 3 | 4 | 3 |
|  | 2 | 4 | 3 |
|  | 3 | 4 | 3 |
|  | 1 | 4 | 4 |
|  | 2 | 5 | 3 |
|  | 4 | 4 | 3 |
|  | 2 | 5 | 2 |
|  | 3 | 4 | 3 |
|  | 2 | 4 | 3 |
|  | 3 | 3 | 3 |
|  | 2 | 4 | 3 |
|  | 2 | 4 | 2 |
|  | 2 | 4 | 2 |
|  | 2 | 5 | 4 |
|  | 1 | 5 | 4 |
|  | 4 | 3 | 4 |
|  | 2 | 5 | 4 |
|  | 1 | 5 | 1 |
|  | 1 | 3 | 1 |
|  | 3 | 3 | 2 |
|  | 3 | 4 | 2 |
|  | 4 | 3 | 4 |
|  | 4 | 5 | 4 |
|  | 4 | 5 | 1 |
|  | 2 | 2 | 5 |
|  | 3 | 5 | 2 |
|  | 4 | 5 | 3 |
|  | 3 | 5 | 5 |
|  | 3 | 4 | 1 |
|  | 1 | 5 | 4 |
|  | 2 | 5 | 2 |
|  | 2 | 4 | 1 |
|  | 2 | 4 | 2 |
|  | 5 | 3 | 4 |
|  | 3 | 5 | 3 |
|  | 5 | 2 | 2 |
|  | 1 | 5 | 4 |
|  | 4 | 5 | 3 |
|  | 1 | 5 | 2 |
|  | 3 | 5 | 5 |
|  | 1 | 5 | 3 |
|  | 3 | 5 | 2 |
|  | 3 | 5 | 2 |
|  | 5 | 2 | 3 |

|  |   |   |   |
|--|---|---|---|
|  | 3 | 5 | 3 |
|  | 1 | 5 | 4 |
|  | 4 | 5 | 1 |
|  | 3 | 5 | 2 |
|  | 3 | 3 | 3 |
|  | 2 | 4 | 2 |
|  | 1 | 5 | 2 |
|  | 2 | 5 | 2 |
|  | 2 | 5 | 1 |
|  | 3 | 4 | 2 |
|  | 3 | 5 | 4 |
|  | 3 | 2 | 4 |
|  | 4 | 5 | 5 |
|  | 1 | 5 | 3 |
|  | 2 | 5 | 1 |
|  | 1 | 5 | 3 |
|  | 1 | 5 | 3 |
|  | 4 | 4 | 2 |
|  | 2 | 4 | 4 |
|  | 2 | 2 | 4 |
|  | 4 | 4 | 2 |
|  | 3 | 4 | 2 |
|  | 3 | 3 | 1 |
|  | 1 | 5 | 2 |
|  | 2 | 5 | 4 |
|  | 3 | 5 | 3 |
|  | 4 | 4 | 3 |
|  | 4 | 5 | 2 |
|  | 3 | 4 | 2 |
|  | 2 | 5 | 3 |
|  | 1 | 5 | 4 |
|  | 5 | 5 | 2 |
|  | 2 | 5 | 2 |
|  | 4 | 4 | 4 |
|  | 1 | 5 | 2 |
|  | 2 | 5 | 4 |
|  | 2 | 4 | 1 |
|  | 2 | 4 | 1 |
|  | 2 | 4 | 1 |
|  | 1 | 5 | 3 |
|  | 1 | 4 | 2 |
|  | 3 | 5 | 2 |
|  | 1 | 5 | 2 |
|  | 3 | 5 | 3 |
|  | 4 | 3 | 4 |
|  | 1 | 4 | 3 |
|  | 1 | 5 | 5 |
|  | 1 | 5 | 4 |

|   |   |   |
|---|---|---|
| 2 | 3 | 3 |
| 1 | 4 | 4 |
| 3 | 5 | 2 |
| 3 | 2 | 1 |
| 3 | 4 | 2 |
| 2 | 4 | 2 |
| 2 | 5 | 2 |
| 4 | 5 | 4 |
| 4 | 4 | 1 |
| 2 | 5 | 1 |
| 1 | 5 | 2 |
| 5 | 5 | 5 |

the 'information' and 'communication' fields. The 'information' field is defined as:

...the study of the processes of information production, distribution, access, use and evaluation, and the study of the social, cultural, economic and political contexts in which these processes take place. (p. 10)

The 'communication' field is defined as:

...the study of the processes of communication production, distribution, access, use and evaluation, and the study of the social, cultural, economic and political contexts in which these processes take place. (p. 10)

The 'information science' field is defined as:

...the study of the processes of information production, distribution, access, use and evaluation, and the study of the social, cultural, economic and political contexts in which these processes take place. (p. 10)

The 'information studies' field is defined as:

...the study of the processes of information production, distribution, access, use and evaluation, and the study of the social, cultural, economic and political contexts in which these processes take place. (p. 10)

The 'information research' field is defined as:

...the study of the processes of information production, distribution, access, use and evaluation, and the study of the social, cultural, economic and political contexts in which these processes take place. (p. 10)

The 'information practice' field is defined as:

...the study of the processes of information production, distribution, access, use and evaluation, and the study of the social, cultural, economic and political contexts in which these processes take place. (p. 10)

The 'information theory' field is defined as:

...the study of the processes of information production, distribution, access, use and evaluation, and the study of the social, cultural, economic and political contexts in which these processes take place. (p. 10)

The 'information technology' field is defined as:

...the study of the processes of information production, distribution, access, use and evaluation, and the study of the social, cultural, economic and political contexts in which these processes take place. (p. 10)

The 'information systems' field is defined as:

...the study of the processes of information production, distribution, access, use and evaluation, and the study of the social, cultural, economic and political contexts in which these processes take place. (p. 10)

The 'information management' field is defined as:

...the study of the processes of information production, distribution, access, use and evaluation, and the study of the social, cultural, economic and political contexts in which these processes take place. (p. 10)

The 'information science' field is defined as:

...the study of the processes of information production, distribution, access, use and evaluation, and the study of the social, cultural, economic and political contexts in which these processes take place. (p. 10)

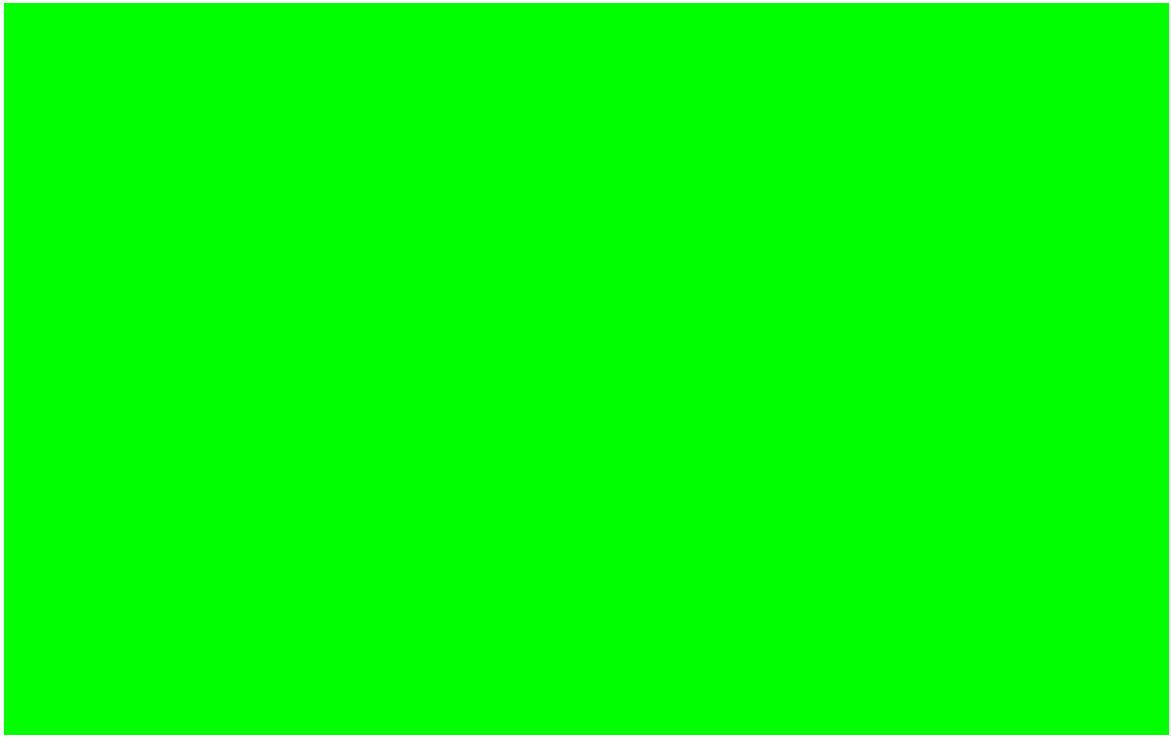



| Regarding the process | Regarding the process | Regarding the process | Regarding the process |
|-----------------------|-----------------------|-----------------------|-----------------------|
| 3                     | 4                     | 4                     | 4                     |
| 5                     | 3                     | 3                     | 4                     |
| 2                     | 2                     | 2                     | 2                     |
| 2                     | 2                     | 2                     | 1                     |
| 4                     | 4                     | 4                     | 4                     |
| 1                     | 2                     | 2                     | 4                     |
| 3                     | 2                     | 2                     | 3                     |
| 4                     | 3                     | 4                     | 5                     |
| 3                     | 3                     | 5                     | 5                     |
| 2                     | 2                     | 2                     | 2                     |
| 1                     | 2                     | 2                     | 2                     |
| 4                     | 3                     | 5                     | 5                     |
| 3                     | 3                     | 3                     | 3                     |
| 2                     | 2                     | 2                     | 3                     |
| 5                     | 3                     | 5                     | 5                     |
| 2                     | 2                     | 3                     | 4                     |
| 4                     | 3                     | 4                     | 4                     |
| 2                     | 3                     | 3                     | 2                     |
| 2                     | 3                     | 3                     | 2                     |
| 3                     | 3                     | 3                     | 3                     |
| 4                     | 3                     | 3                     | 4                     |
| 4                     | 3                     | 4                     | 3                     |
| 2                     | 2                     | 5                     | 5                     |
| 2                     | 2                     | 3                     | 5                     |
| 2                     | 2                     | 2                     | 3                     |
| 1                     | 2                     | 2                     | 2                     |
| 3                     | 3                     | 2                     | 3                     |
| 3                     | 3                     | 4                     | 5                     |
| 2                     | 3                     | 2                     | 4                     |
| 4                     | 3                     | 4                     | 5                     |
| 3                     | 3                     | 4                     | 4                     |
| 3                     | 2                     | 3                     | 3                     |
| 4                     | 4                     | 4                     | 4                     |
| 3                     | 3                     | 4                     | 4                     |
| 3                     | 3                     | 3                     | 3                     |
| 3                     | 3                     | 4                     | 5                     |
| 1                     | 1                     | 2                     | 1                     |
| 3                     | 3                     | 4                     | 5                     |
| 3                     | 3                     | 4                     | 4                     |
| 3                     | 3                     | 4                     | 4                     |
| 3                     | 3                     | 4                     | 3                     |
| 3                     | 2                     | 2                     | 2                     |
| 4                     | 3                     | 4                     | 4                     |
| 4                     | 3                     | 3                     | 4                     |
| 2                     | 1                     | 2                     | 3                     |
| 3                     | 3                     | 4                     | 4                     |
| 4                     | 4                     | 2                     | 1                     |

|   |   |   |   |
|---|---|---|---|
| 3 | 3 | 2 | 3 |
| 4 | 4 | 4 | 5 |
| 4 | 3 | 4 | 5 |
| 3 | 4 | 4 | 4 |
| 4 | 4 | 4 | 5 |
| 5 | 5 | 5 | 5 |
| 4 | 3 | 4 | 4 |
| 3 | 4 | 4 | 3 |
| 2 | 2 | 3 | 5 |
| 2 | 1 | 4 | 5 |
| 3 | 3 | 3 | 4 |
| 3 | 3 | 3 | 4 |
| 3 | 2 | 4 | 5 |
| 2 | 2 | 5 | 3 |
| 1 | 1 | 4 | 4 |
| 2 | 2 | 1 | 2 |
| 5 | 3 | 4 | 5 |
| 2 | 2 | 2 | 2 |
| 3 | 2 | 4 | 5 |
| 4 | 3 | 4 | 4 |
| 4 | 4 | 3 | 4 |
| 3 | 2 | 3 | 4 |
| 2 | 2 | 5 | 5 |
| 3 | 3 | 5 | 5 |
| 4 | 3 | 3 | 4 |
| 3 | 2 | 3 | 4 |
| 3 | 4 | 4 | 4 |
| 3 | 4 | 3 | 4 |
| 3 | 2 | 3 | 3 |
| 3 | 2 | 3 | 3 |
| 2 | 2 | 4 | 4 |
| 4 | 2 | 4 | 4 |
| 3 | 3 | 3 | 5 |
| 3 | 2 | 4 | 5 |
| 3 | 2 | 4 | 5 |
| 4 | 4 | 4 | 4 |
| 3 | 3 | 4 | 5 |
| 3 | 3 | 4 | 4 |
| 4 | 4 | 5 | 5 |
| 4 | 3 | 4 | 5 |
| 2 | 4 | 2 | 2 |
| 5 | 4 | 4 | 4 |
| 3 | 1 | 4 | 4 |
| 4 | 4 | 4 | 4 |
| 3 | 3 | 3 | 4 |
| 4 | 2 | 4 | 4 |
| 3 | 3 | 4 | 5 |
| 4 | 2 | 3 | 4 |

|   |   |   |   |
|---|---|---|---|
| 3 | 2 | 3 | 3 |
| 2 | 3 | 4 | 4 |
| 3 | 3 | 3 | 3 |
| 2 | 2 | 3 | 3 |
| 2 | 3 | 4 | 4 |
| 4 | 3 | 4 | 4 |
| 3 | 3 | 4 | 4 |
| 3 | 2 | 4 | 4 |
| 4 | 3 | 4 | 4 |
| 4 | 4 | 4 | 5 |
| 4 | 3 | 4 | 5 |
| 3 | 2 | 3 | 3 |
| 4 | 3 | 4 | 4 |
| 3 | 3 | 3 | 3 |
| 4 | 3 | 4 | 4 |
| 4 | 4 | 4 | 5 |
| 4 | 4 | 3 | 5 |
| 4 | 4 | 4 | 4 |
| 4 | 3 | 4 | 4 |
| 2 | 2 | 4 | 5 |
| 4 | 4 | 4 | 5 |
| 3 | 1 | 2 | 5 |
| 1 | 2 | 2 | 3 |
| 2 | 2 | 1 | 1 |
| 3 | 4 | 4 | 4 |
| 2 | 2 | 4 | 3 |
| 4 | 4 | 4 | 5 |
| 3 | 4 | 3 | 5 |
| 2 | 2 | 2 | 2 |
| 3 | 4 | 4 | 5 |
| 3 | 2 | 5 | 5 |
| 4 | 4 | 5 | 5 |
| 4 | 3 | 4 | 4 |
| 3 | 2 | 4 | 5 |
| 2 | 2 | 3 | 4 |
| 4 | 4 | 5 | 5 |
| 4 | 3 | 5 | 5 |
| 1 | 1 | 3 | 4 |
| 2 | 3 | 4 | 4 |
| 4 | 3 | 2 | 3 |
| 4 | 4 | 5 | 5 |
| 2 | 2 | 4 | 5 |
| 3 | 3 | 3 | 4 |
| 5 | 5 | 5 | 5 |
| 3 | 3 | 4 | 5 |
| 3 | 2 | 4 | 5 |
| 3 | 2 | 4 | 5 |
| 3 | 3 | 4 | 5 |

|   |   |   |   |
|---|---|---|---|
| 4 | 4 | 4 | 5 |
| 3 | 3 | 5 | 5 |
| 2 | 1 | 4 | 5 |
| 4 | 2 | 4 | 4 |
| 3 | 3 | 3 | 3 |
| 4 | 1 | 3 | 4 |
| 2 | 2 | 5 | 5 |
| 1 | 1 | 4 | 5 |
| 2 | 2 | 5 | 5 |
| 4 | 2 | 3 | 3 |
| 4 | 4 | 5 | 5 |
| 2 | 2 | 3 | 3 |
| 3 | 3 | 5 | 5 |
| 4 | 3 | 4 | 5 |
| 4 | 1 | 1 | 4 |
| 3 | 3 | 4 | 5 |
| 4 | 4 | 5 | 5 |
| 3 | 2 | 3 | 4 |
| 4 | 3 | 5 | 5 |
| 4 | 4 | 2 | 5 |
| 2 | 2 | 3 | 4 |
| 4 | 4 | 4 | 5 |
| 2 | 2 | 3 | 3 |
| 3 | 3 | 4 | 4 |
| 5 | 5 | 5 | 5 |
| 5 | 4 | 4 | 5 |
| 2 | 2 | 3 | 4 |
| 4 | 3 | 4 | 5 |
| 4 | 2 | 2 | 2 |
| 3 | 3 | 3 | 3 |
| 4 | 4 | 4 | 5 |
| 1 | 3 | 2 | 4 |
| 3 | 4 | 4 | 5 |
| 3 | 3 | 4 | 4 |
| 4 | 3 | 4 | 5 |
| 3 | 4 | 4 | 5 |
| 3 | 2 | 4 | 4 |
| 3 | 2 | 4 | 4 |
| 4 | 2 | 5 | 5 |
| 4 | 2 | 3 | 5 |
| 3 | 3 | 4 | 5 |
| 3 | 3 | 5 | 5 |
| 3 | 4 | 5 | 5 |
| 4 | 4 | 4 | 4 |
| 4 | 4 | 4 | 4 |
| 3 | 3 | 4 | 4 |
| 1 | 5 | 5 | 5 |
| 5 | 4 | 4 | 5 |

|   |   |   |   |
|---|---|---|---|
| 2 | 2 | 3 | 3 |
| 3 | 2 | 4 | 5 |
| 3 | 4 | 4 | 5 |
| 1 | 1 | 1 | 2 |
| 4 | 3 | 4 | 5 |
| 4 | 4 | 5 | 5 |
| 2 | 3 | 5 | 4 |
| 3 | 4 | 5 | 3 |
| 3 | 3 | 2 | 5 |
| 4 | 3 | 4 | 5 |
| 1 | 2 | 5 | 5 |
| 2 | 2 | 3 | 5 |



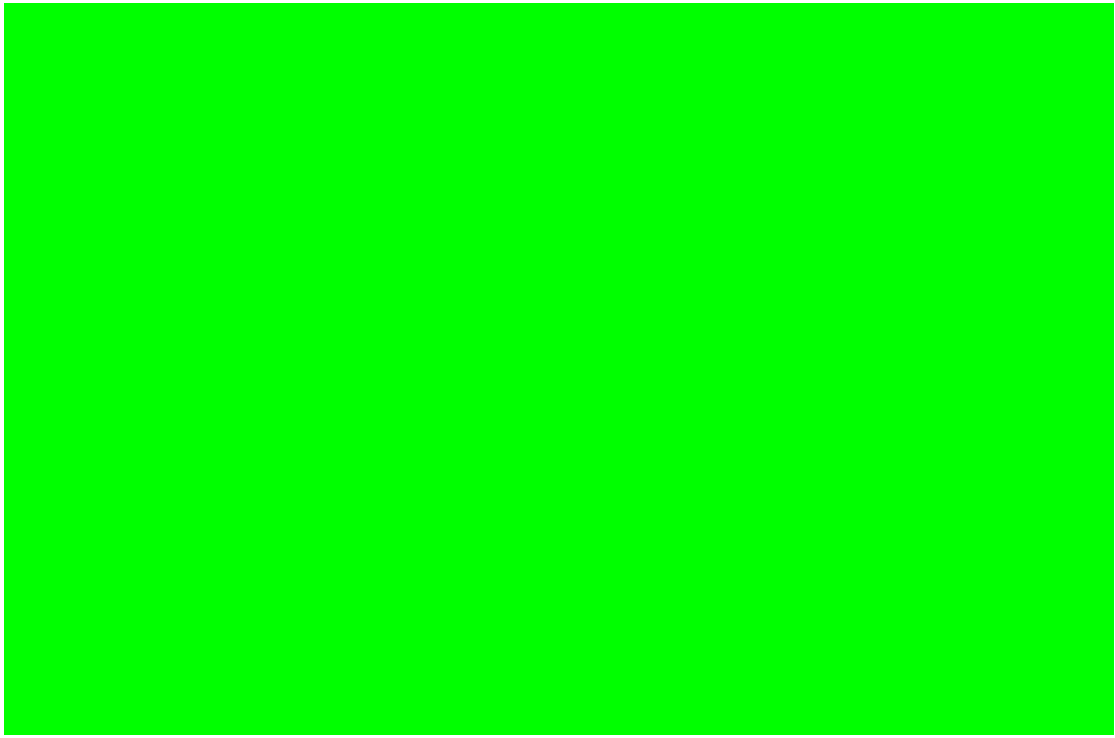

What are your main sources of information on climate change? What are your main sources of information on climate change?

3  
2  
1  
3  
2  
2  
2  
4  
3  
1  
1  
5  
4  
2  
4  
3  
4  
2  
2  
3  
5  
3  
5  
4  
3  
2  
3  
4  
5  
5  
4  
1  
4  
3  
3  
2  
1  
5  
4  
3  
2  
2  
3  
3  
3  
4  
2

3  
3  
2  
3  
2  
4  
3  
3  
3  
2  
4  
4  
2  
5  
3  
3  
2  
2  
3  
3  
4  
5  
3  
3  
2  
3  
3  
5  
4  
5  
5  
4  
5  
4  
4  
3  
3  
2  
4  
3  
4  
4  
2



|  |   |   |
|--|---|---|
|  | 3 | 3 |
|  | 5 | 4 |
|  | 3 | 4 |
|  | 5 | 5 |
|  | 4 | 5 |
|  | 5 | 4 |
|  | 4 | 4 |
|  | 5 | 4 |
|  | 4 | 4 |
|  | 4 | 4 |
|  | 5 | 1 |
|  | 5 | 1 |
|  | 5 | 5 |
|  | 4 | 4 |
|  | 3 | 4 |
|  | 3 | 3 |
|  | 5 | 5 |
|  | 1 | 2 |
|  | 5 | 5 |
|  | 4 | 3 |
|  | 4 | 3 |
|  | 4 | 4 |
|  | 5 | 5 |
|  | 4 | 5 |
|  | 3 | 4 |
|  | 4 | 4 |
|  | 4 | 4 |
|  | 4 | 4 |
|  | 3 | 3 |
|  | 3 | 3 |
|  | 4 | 1 |
|  | 3 | 2 |
|  | 4 | 4 |
|  | 3 | 3 |
|  | 2 | 4 |
|  | 4 | 4 |
|  | 4 | 4 |
|  | 5 | 4 |
|  | 4 | 4 |
|  | 5 | 4 |
|  | 1 | 2 |
|  | 3 | 4 |
|  | 4 | 4 |
|  | 5 | 3 |
|  | 1 | 5 |
|  | 4 | 4 |
|  | 4 | 3 |
|  | 4 | 4 |

|  |   |   |
|--|---|---|
|  | 3 | 3 |
|  | 2 | 3 |
|  | 2 | 5 |
|  | 3 | 4 |
|  | 4 | 4 |
|  | 5 | 4 |
|  | 4 | 4 |
|  | 3 | 4 |
|  | 4 | 4 |
|  | 4 | 5 |
|  | 4 | 4 |
|  | 2 | 4 |
|  | 3 | 3 |
|  | 1 | 3 |
|  | 4 | 3 |
|  | 5 | 4 |
|  | 3 | 4 |
|  | 3 | 4 |
|  | 3 | 3 |
|  | 3 | 3 |
|  | 4 | 4 |
|  | 5 | 5 |
|  | 5 | 3 |
|  | 1 | 3 |
|  | 4 | 5 |
|  | 4 | 4 |
|  | 4 | 4 |
|  | 3 | 5 |
|  | 3 | 3 |
|  | 4 | 5 |
|  | 5 | 2 |
|  | 5 | 5 |
|  | 4 | 4 |
|  | 5 | 5 |
|  | 4 | 4 |
|  | 4 | 4 |
|  | 5 | 5 |
|  | 4 | 4 |
|  | 4 | 3 |
|  | 3 | 4 |
|  | 5 | 4 |
|  | 5 | 5 |
|  | 4 | 5 |
|  | 5 | 5 |
|  | 3 | 3 |
|  | 4 | 4 |
|  | 5 | 5 |
|  | 5 | 5 |

|  |   |   |
|--|---|---|
|  | 3 | 3 |
|  | 5 | 5 |
|  | 3 | 2 |
|  | 4 | 4 |
|  | 4 | 4 |
|  | 2 | 1 |
|  | 3 | 3 |
|  | 4 | 4 |
|  | 4 | 5 |
|  | 4 | 4 |
|  | 4 | 4 |
|  | 3 | 3 |
|  | 5 | 1 |
|  | 4 | 4 |
|  | 5 | 5 |
|  | 4 | 4 |
|  | 5 | 5 |
|  | 4 | 4 |
|  | 4 | 4 |
|  | 4 | 4 |
|  | 4 | 4 |
|  | 4 | 4 |
|  | 4 | 4 |
|  | 3 | 4 |
|  | 3 | 4 |
|  | 5 | 5 |
|  | 5 | 5 |
|  | 4 | 5 |
|  | 5 | 5 |
|  | 4 | 5 |
|  | 3 | 5 |
|  | 5 | 5 |
|  | 3 | 5 |
|  | 5 | 5 |
|  | 5 | 4 |
|  | 5 | 5 |
|  | 5 | 5 |
|  | 5 | 4 |
|  | 5 | 4 |
|  | 5 | 4 |
|  | 5 | 5 |
|  | 5 | 4 |
|  | 3 | 3 |
|  | 4 | 4 |
|  | 5 | 5 |
|  | 4 | 5 |
|  | 3 | 5 |
|  | 5 | 4 |
|  | 5 | 4 |
|  | 4 | 2 |

3  
5  
5  
4  
5  
4  
5  
5  
2  
4  
5  
5

5  
5  
5  
2  
4  
4  
5  
5  
5  
4  
5  
5



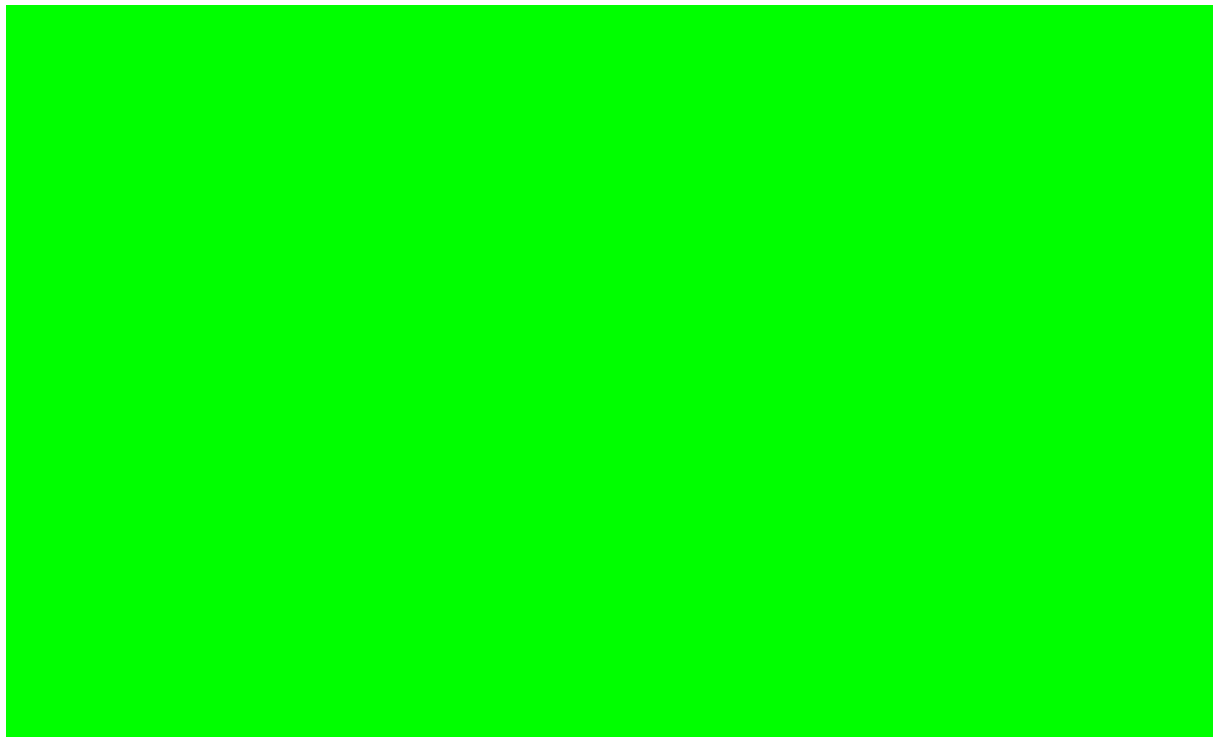

What are your main sources of information on climate change? What are your main sources of information on climate change?

|   |   |
|---|---|
| 4 | 1 |
| 3 | 4 |
| 2 | 2 |
| 2 | 4 |
| 3 | 2 |
| 3 | 2 |
| 4 | 4 |
| 4 | 4 |
| 5 | 4 |
| 3 | 3 |
| 1 | 2 |
| 4 | 1 |
| 2 | 3 |
| 2 | 3 |
| 3 | 3 |
| 3 | 3 |
| 2 | 4 |
| 3 | 3 |
| 3 | 3 |
| 3 | 3 |
| 4 | 3 |
| 4 | 5 |
| 5 | 1 |
| 4 | 4 |
| 3 | 3 |
| 5 | 5 |
| 4 | 2 |
| 2 | 5 |
| 5 | 3 |
| 5 | 3 |
| 3 | 3 |
| 5 | 3 |
| 2 | 2 |
| 2 | 2 |
| 3 | 3 |
| 3 | 1 |
| 1 | 1 |
| 4 | 4 |
| 3 | 2 |
| 3 | 3 |
| 3 | 3 |
| 3 | 3 |
| 4 | 3 |
| 4 | 4 |
| 3 | 2 |
| 1 | 1 |
| 1 | 2 |

|  |   |   |
|--|---|---|
|  | 3 | 2 |
|  | 3 | 3 |
|  | 4 | 3 |
|  | 5 | 3 |
|  | 3 | 1 |
|  | 4 | 4 |
|  | 4 | 4 |
|  | 4 | 3 |
|  | 4 | 1 |
|  | 4 | 2 |
|  | 5 | 5 |
|  | 5 | 5 |
|  | 5 | 5 |
|  | 5 | 4 |
|  | 4 | 1 |
|  | 3 | 2 |
|  | 5 | 2 |
|  | 3 | 3 |
|  | 4 | 3 |
|  | 3 | 3 |
|  | 4 | 4 |
|  | 4 | 3 |
|  | 5 | 3 |
|  | 4 | 2 |
|  | 3 | 3 |
|  | 2 | 2 |
|  | 4 | 4 |
|  | 4 | 3 |
|  | 4 | 3 |
|  | 4 | 3 |
|  | 4 | 2 |
|  | 3 | 3 |
|  | 4 | 2 |
|  | 3 | 1 |
|  | 3 | 2 |
|  | 4 | 3 |
|  | 5 | 2 |
|  | 4 | 2 |
|  | 4 | 4 |
|  | 5 | 4 |
|  | 1 | 4 |
|  | 4 | 4 |
|  | 3 | 4 |
|  | 3 | 2 |
|  | 2 | 1 |
|  | 4 | 2 |
|  | 4 | 5 |
|  | 2 | 2 |



|  |   |   |
|--|---|---|
|  | 4 | 4 |
|  | 4 | 3 |
|  | 5 | 5 |
|  | 4 | 3 |
|  | 4 | 3 |
|  | 4 | 3 |
|  | 4 | 3 |
|  | 3 | 4 |
|  | 4 | 5 |
|  | 5 | 5 |
|  | 4 | 3 |
|  | 2 | 2 |
|  | 4 | 3 |
|  | 2 | 2 |
|  | 4 | 3 |
|  | 3 | 3 |
|  | 4 | 3 |
|  | 4 | 4 |
|  | 4 | 2 |
|  | 4 | 1 |
|  | 4 | 4 |
|  | 2 | 5 |
|  | 5 | 5 |
|  | 2 | 3 |
|  | 4 | 3 |
|  | 4 | 4 |
|  | 5 | 2 |
|  | 4 | 5 |
|  | 5 | 5 |
|  | 2 | 4 |
|  | 5 | 5 |
|  | 5 | 2 |
|  | 5 | 2 |
|  | 2 | 1 |
|  | 4 | 2 |
|  | 4 | 3 |
|  | 5 | 5 |
|  | 5 | 4 |
|  | 5 | 1 |
|  | 4 | 3 |
|  | 3 | 4 |
|  | 5 | 4 |
|  | 2 | 1 |
|  | 3 | 3 |
|  | 3 | 4 |
|  | 5 | 4 |
|  | 5 | 5 |
|  | 4 | 2 |

|  |   |   |
|--|---|---|
|  | 3 | 3 |
|  | 5 | 2 |
|  | 4 | 2 |
|  | 5 | 2 |
|  | 4 | 4 |
|  | 4 | 4 |
|  | 5 | 1 |
|  | 5 | 3 |
|  | 5 | 3 |
|  | 3 | 2 |
|  | 5 | 2 |
|  | 5 | 4 |
|  | 5 | 2 |
|  | 5 | 3 |
|  | 4 | 5 |
|  | 4 | 4 |
|  | 5 | 5 |
|  | 4 | 4 |
|  | 4 | 4 |
|  | 5 | 4 |
|  | 4 | 3 |
|  | 3 | 2 |
|  | 2 | 2 |
|  | 5 | 3 |
|  | 5 | 4 |
|  | 5 | 5 |
|  | 5 | 2 |
|  | 3 | 3 |
|  | 3 | 4 |
|  | 5 | 5 |
|  | 5 | 5 |
|  | 5 | 1 |
|  | 5 | 5 |
|  | 4 | 4 |
|  | 4 | 4 |
|  | 5 | 5 |
|  | 4 | 4 |
|  | 4 | 4 |
|  | 2 | 2 |
|  | 5 | 3 |
|  | 5 | 5 |
|  | 4 | 2 |
|  | 5 | 5 |
|  | 5 | 3 |
|  | 3 | 2 |
|  | 5 | 3 |
|  | 5 | 3 |
|  | 3 | 4 |

4  
5  
4  
2  
3  
2  
5  
5  
4  
4  
5

5  
5  
3  
3  
3  
2  
4  
2  
2  
4  
5  
3



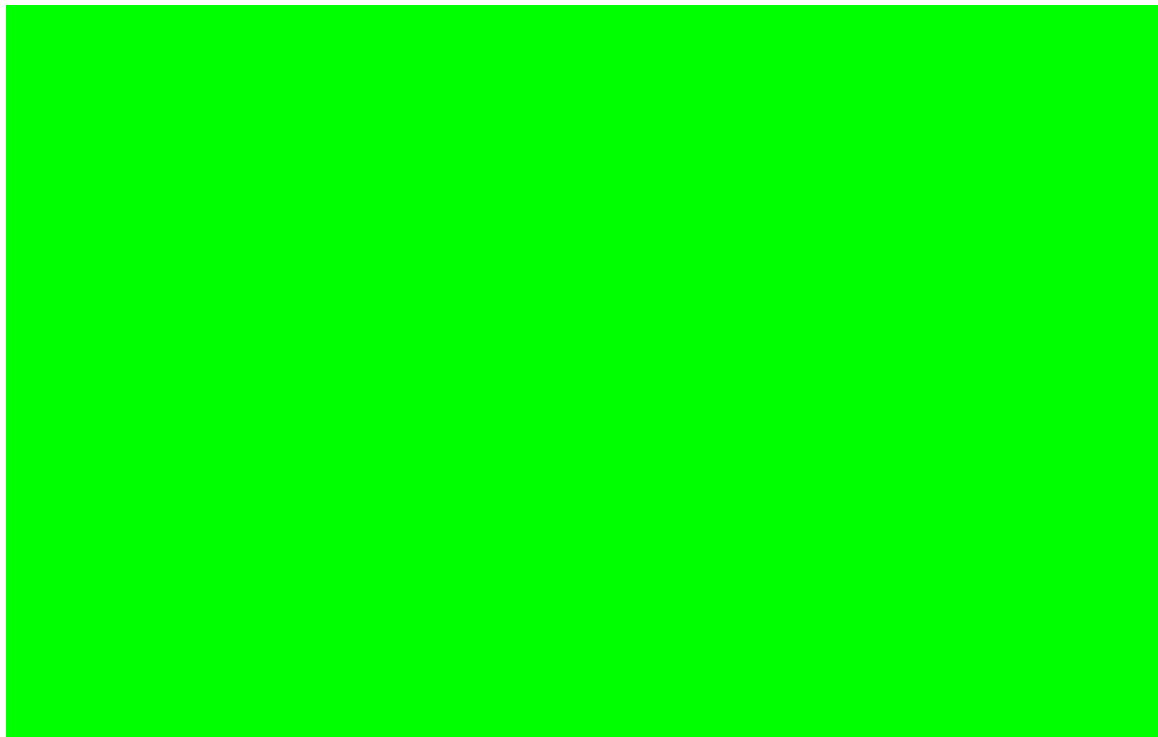

What are your main sources of information on climate change? What are your main sources of information on climate change?

|   |   |
|---|---|
| 4 | 3 |
| 2 | 1 |
| 2 | 2 |
| 4 | 2 |
| 4 | 3 |
| 3 | 4 |
| 4 | 4 |
| 3 | 2 |
| 4 | 3 |
| 3 | 3 |
| 4 | 3 |
| 2 | 4 |
| 4 | 4 |
| 3 | 2 |
| 3 | 2 |
| 3 | 3 |
| 4 | 4 |
| 3 | 3 |
| 3 | 3 |
| 3 | 3 |
| 1 | 1 |
| 1 | 3 |
| 1 | 1 |
| 2 | 2 |
| 2 | 2 |
| 2 | 2 |
| 3 | 2 |
| 1 | 3 |
| 3 | 3 |
| 2 | 4 |
| 4 | 4 |
| 4 | 5 |
| 1 | 1 |
| 3 | 3 |
| 3 | 3 |
| 5 | 4 |
| 3 | 1 |
| 1 | 3 |
| 2 | 3 |
| 3 | 3 |
| 4 | 3 |
| 4 | 4 |
| 4 | 4 |
| 4 | 4 |
| 1 | 1 |
| 2 | 2 |
| 3 | 3 |

|  |   |   |
|--|---|---|
|  | 3 | 3 |
|  | 3 | 3 |
|  | 3 | 3 |
|  | 4 | 5 |
|  | 5 | 5 |
|  | 5 | 5 |
|  | 5 | 4 |
|  | 5 | 5 |
|  | 1 | 1 |
|  | 4 | 1 |
|  | 5 | 1 |
|  | 5 | 1 |
|  | 2 | 2 |
|  | 2 | 3 |
|  | 2 | 2 |
|  | 2 | 2 |
|  | 2 | 2 |
|  | 2 | 2 |
|  | 2 | 2 |
|  | 2 | 2 |
|  | 3 | 2 |
|  | 3 | 2 |
|  | 4 | 4 |
|  | 1 | 1 |
|  | 2 | 3 |
|  | 2 | 3 |
|  | 3 | 3 |
|  | 4 | 3 |
|  | 3 | 4 |
|  | 4 | 4 |
|  | 4 | 4 |
|  | 4 | 4 |
|  | 1 | 4 |
|  | 3 | 4 |
|  | 4 | 4 |
|  | 5 | 5 |
|  | 5 | 5 |
|  | 2 | 1 |
|  | 1 | 2 |
|  | 3 | 2 |
|  | 3 | 2 |
|  | 3 | 2 |
|  | 4 | 4 |
|  | 4 | 4 |
|  | 4 | 4 |
|  | 4 | 5 |
|  | 3 | 2 |
|  | 3 | 3 |
|  | 4 | 3 |
|  | 4 | 3 |
|  | 2 | 4 |

|  |   |   |
|--|---|---|
|  | 4 | 4 |
|  | 4 | 4 |
|  | 5 | 5 |
|  | 2 | 3 |
|  | 3 | 3 |
|  | 2 | 2 |
|  | 3 | 3 |
|  | 3 | 3 |
|  | 3 | 3 |
|  | 3 | 3 |
|  | 1 | 4 |
|  | 3 | 4 |
|  | 3 | 4 |
|  | 4 | 4 |
|  | 4 | 4 |
|  | 2 | 4 |
|  | 4 | 4 |
|  | 4 | 4 |
|  | 3 | 5 |
|  | 4 | 3 |
|  | 4 | 4 |
|  | 1 | 3 |
|  | 2 | 4 |
|  | 3 | 4 |
|  | 3 | 4 |
|  | 4 | 4 |
|  | 5 | 5 |
|  | 5 | 5 |
|  | 3 | 5 |
|  | 1 | 1 |
|  | 1 | 1 |
|  | 3 | 3 |
|  | 3 | 4 |
|  | 5 | 5 |
|  | 3 | 2 |
|  | 3 | 2 |
|  | 5 | 2 |
|  | 3 | 3 |
|  | 4 | 3 |
|  | 5 | 5 |
|  | 1 | 2 |
|  | 2 | 2 |
|  | 2 | 3 |
|  | 3 | 3 |
|  | 4 | 3 |
|  | 4 | 3 |
|  | 2 | 4 |
|  | 3 | 4 |



|  |   |   |
|--|---|---|
|  | 3 | 4 |
|  | 1 | 2 |
|  | 1 | 4 |
|  | 2 | 4 |
|  | 4 | 4 |
|  | 5 | 4 |
|  | 4 | 4 |
|  | 4 | 5 |
|  | 4 | 5 |
|  | 1 | 1 |
|  | 2 | 2 |
|  | 4 | 3 |
|  | 2 | 2 |
|  | 2 | 2 |
|  | 3 | 2 |
|  | 2 | 3 |
|  | 3 | 3 |
|  | 4 | 3 |
|  | 4 | 4 |
|  | 4 | 4 |
|  | 3 | 3 |
|  | 5 | 4 |
|  | 4 | 4 |
|  | 4 | 4 |
|  | 4 | 4 |
|  | 4 | 4 |
|  | 5 | 5 |
|  | 3 | 5 |
|  | 5 | 5 |
|  | 5 | 5 |
|  | 3 | 2 |
|  | 5 | 2 |
|  | 3 | 2 |
|  | 3 | 3 |
|  | 3 | 3 |
|  | 3 | 3 |
|  | 4 | 3 |
|  | 4 | 3 |
|  | 4 | 4 |
|  | 4 | 4 |
|  | 3 | 5 |
|  | 5 | 4 |
|  | 5 | 5 |
|  | 3 | 3 |
|  | 2 | 5 |
|  | 5 | 5 |
|  | 5 | 5 |
|  | 5 | 5 |

5  
2  
1  
4  
3  
4  
4  
5  
5  
5  
1  
3

5  
4  
3  
3  
4  
4  
4  
5  
5  
4  
4  
5



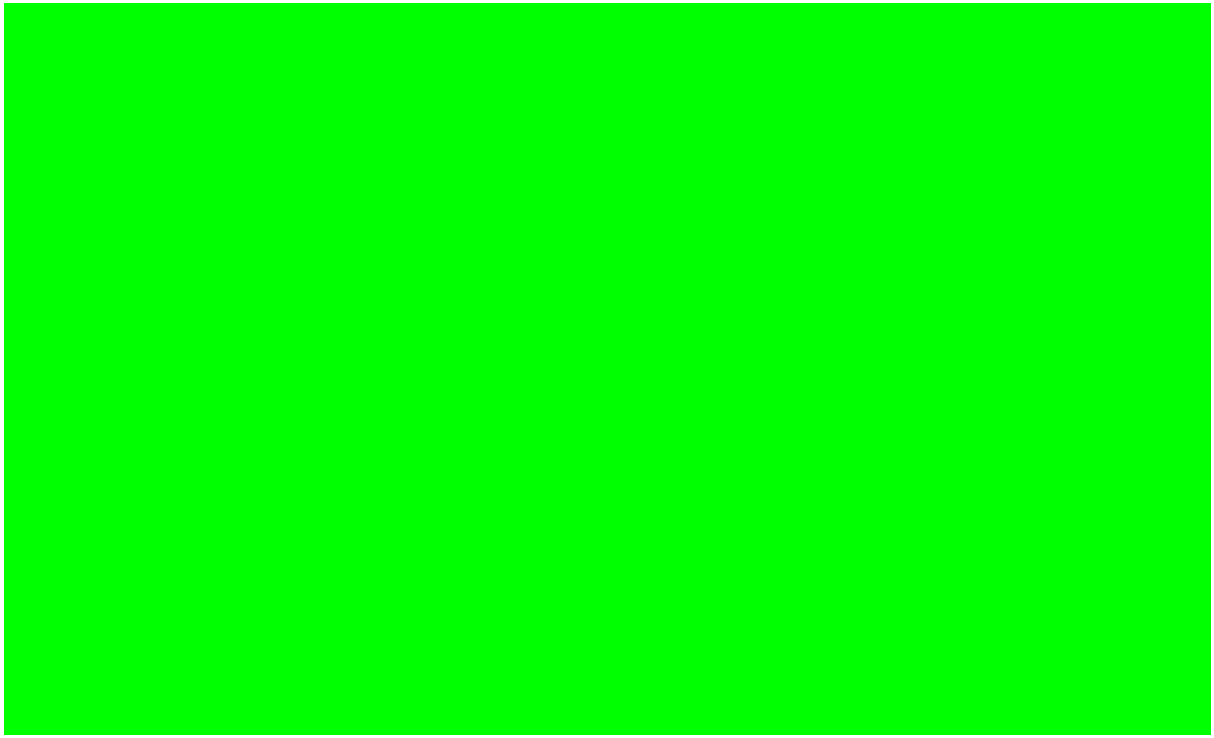

What are your main sources of information on climate change? What are your main sources of information on climate change?

|   |   |
|---|---|
| 3 | 1 |
| 4 | 1 |
| 2 | 2 |
| 2 | 2 |
| 1 | 3 |
| 4 | 3 |
| 5 | 3 |
| 2 | 1 |
| 2 | 1 |
| 3 | 1 |
| 3 | 1 |
| 4 | 1 |
| 4 | 1 |
| 2 | 2 |
| 2 | 2 |
| 2 | 2 |
| 4 | 2 |
| 3 | 3 |
| 3 | 3 |
| 3 | 3 |
| 1 | 4 |
| 5 | 4 |
| 1 | 5 |
| 1 | 1 |
| 2 | 1 |
| 2 | 1 |
| 2 | 1 |
| 3 | 1 |
| 3 | 1 |
| 4 | 1 |
| 4 | 1 |
| 4 | 1 |
| 2 | 2 |
| 2 | 2 |
| 2 | 2 |
| 2 | 2 |
| 3 | 2 |
| 3 | 2 |
| 3 | 2 |
| 3 | 2 |
| 3 | 2 |
| 4 | 2 |
| 4 | 2 |
| 4 | 2 |
| 1 | 3 |
| 2 | 3 |
| 3 | 3 |

|  |   |   |
|--|---|---|
|  | 3 | 3 |
|  | 3 | 3 |
|  | 4 | 3 |
|  | 4 | 3 |
|  | 5 | 3 |
|  | 1 | 4 |
|  | 4 | 4 |
|  | 5 | 5 |
|  | 1 | 1 |
|  | 1 | 1 |
|  | 1 | 1 |
|  | 1 | 1 |
|  | 1 | 1 |
|  | 1 | 1 |
|  | 1 | 1 |
|  | 2 | 1 |
|  | 2 | 1 |
|  | 2 | 1 |
|  | 2 | 1 |
|  | 2 | 1 |
|  | 2 | 1 |
|  | 2 | 1 |
|  | 2 | 1 |
|  | 2 | 1 |
|  | 3 | 1 |
|  | 3 | 1 |
|  | 3 | 1 |
|  | 3 | 1 |
|  | 3 | 1 |
|  | 3 | 1 |
|  | 3 | 1 |
|  | 3 | 1 |
|  | 3 | 1 |
|  | 4 | 1 |
|  | 4 | 1 |
|  | 4 | 1 |
|  | 5 | 1 |
|  | 5 | 1 |
|  | 1 | 2 |
|  | 1 | 2 |
|  | 2 | 2 |
|  | 2 | 2 |
|  | 2 | 2 |
|  | 2 | 2 |
|  | 2 | 2 |
|  | 2 | 2 |
|  | 2 | 2 |
|  | 3 | 2 |
|  | 3 | 2 |
|  | 3 | 2 |
|  | 3 | 2 |
|  | 3 | 2 |

[illegible]

|   |   |
|---|---|
| 3 | 1 |
| 4 | 1 |
| 4 | 1 |
| 4 | 1 |
| 4 | 1 |
| 4 | 1 |
| 5 | 1 |
| 5 | 1 |
| 5 | 1 |
| 1 | 2 |
| 1 | 2 |
| 1 | 2 |
| 2 | 2 |
| 2 | 2 |
| 2 | 2 |
| 2 | 2 |
| 2 | 2 |
| 2 | 2 |
| 2 | 2 |
| 2 | 2 |
| 2 | 2 |
| 2 | 2 |
| 2 | 2 |
| 3 | 2 |
| 3 | 2 |
| 4 | 2 |
| 4 | 2 |
| 4 | 2 |
| 4 | 2 |
| 4 | 2 |
| 5 | 2 |
| 5 | 2 |
| 5 | 2 |
| 1 | 3 |
| 1 | 3 |
| 2 | 3 |
| 3 | 3 |
| 3 | 3 |
| 3 | 3 |
| 3 | 3 |
| 3 | 3 |
| 3 | 3 |
| 3 | 3 |
| 3 | 3 |
| 3 | 3 |
| 4 | 3 |
| 4 | 3 |
| 5 | 3 |
| 5 | 3 |
| 5 | 3 |
| 5 | 3 |
| 5 | 3 |



5  
2  
4  
4  
4  
4  
4  
5  
2  
4  
5  
5

3  
4  
4  
4  
4  
4  
4  
4  
5  
5  
5  
5





|                        |                                                                  |                         |
|------------------------|------------------------------------------------------------------|-------------------------|
| Other, please specify  | In your opinion, what would be the best indicator that           | Please rate your degree |
|                        | an increase in air temperature and a decrease in precipitation   | 1                       |
| Annual meetings of AN  | More frequent extreme weather events                             | 1                       |
|                        |                                                                  | 1                       |
|                        | The Israely Met Office                                           | 1                       |
| si                     | las alteraciones del clima                                       | 1                       |
| books                  | more flooding events                                             | 1                       |
|                        | Polar ice caps melting                                           | 1                       |
|                        | Extreme rain events                                              | 2                       |
| Colleagues             | Extreme weather events - especially storms and floods            | 2                       |
|                        | Winters                                                          | 2                       |
|                        |                                                                  | 2                       |
|                        |                                                                  | 2                       |
|                        | More extreme weather events such as flooding or drought          | 2                       |
|                        | The shift in the onset and cessations of seasons especially      | 2                       |
|                        | Greater number of extreme weather events                         | 2                       |
|                        | Increase in the minimum night temperature, and increase          | 2                       |
|                        | Heat and precipitation records broken                            | 2                       |
|                        | El cambio en las estaciones del año que ya no son tan            | 2                       |
|                        | El cambio en las estaciones del año que ya no son tan            | 2                       |
|                        |                                                                  | 2                       |
|                        | Recurring summer droughts                                        | 2                       |
|                        | Winters have become mild.                                        | 2                       |
|                        |                                                                  | 2                       |
|                        | the increased number of extreme weather events per               | 3                       |
|                        |                                                                  | 3                       |
|                        |                                                                  | 3                       |
|                        | Warming and intense precipitation                                | 3                       |
|                        |                                                                  | 3                       |
|                        |                                                                  | 3                       |
|                        | The rise in temperature and the change in precipitation          | 3                       |
|                        |                                                                  | 3                       |
| Independent research   | Negatively changing weather conditions/patterns and              | 3                       |
| Nothing                | more dry spell , short rainy winter , positive trend temperature | 3                       |
|                        | Vagaries in rainfall distribution                                | 3                       |
|                        |                                                                  | 3                       |
|                        | Temperatures are getting higher and higher not only in           | 3                       |
| My what's app platform | Illegal mining                                                   | 3                       |
|                        |                                                                  | 3                       |
|                        |                                                                  | 3                       |
|                        | Depleting forest cover                                           | 3                       |
|                        |                                                                  | 3                       |
|                        | Across Fiji's two main islands, the number of cool nights        | 3                       |
|                        | Dramatic shifts in long-term patterns                            | 3                       |
|                        | Los fenómenos extremos                                           | 3                       |
|                        | Number of tropical nights                                        | 3                       |
|                        | Temperatura increase                                             | 3                       |
|                        | Mudanças de temperatura.                                         | 3                       |

|                              |                                                              |   |
|------------------------------|--------------------------------------------------------------|---|
|                              |                                                              | 3 |
|                              | Warmer summers and wetter winters. Unusual hurricane         | 3 |
|                              | weather and environmental change in recent years             | 3 |
|                              | Aumento de la temperatura y cambios en el comportamiento     | 3 |
|                              | temperature                                                  | 3 |
|                              | Sea level rise                                               | 3 |
|                              | The increasing frequency of tropical cyclones each year      | 3 |
|                              | Climatic changes in temperature and precipitation/cooling    | 4 |
|                              | Retreating Glaciers and summer droughts/heatwaves            | 4 |
|                              | Événements météorologiques sont beaucoup plus extrêmes       | 4 |
|                              | Événements météorologiques sont beaucoup plus extrêmes       | 4 |
|                              | temperature change                                           | 4 |
|                              | increase in temperature, presence of atmospheric rivers      | 4 |
|                              |                                                              | 4 |
|                              | Minimum temperature trend, changes in spatial and climatic   | 4 |
|                              | Increase in weather extremes                                 | 4 |
|                              |                                                              | 4 |
|                              | Melting glaciers, fewer snowdays and higher average          | 4 |
|                              |                                                              | 4 |
|                              | A maior frequência de eventos extremos de chuva, com         | 4 |
|                              | It should be the impact on the basic needs of the population | 4 |
| University Organization      | Changes in snow or water distribution                        | 4 |
|                              | average monthly rainfall has shifted , more extreme rain     | 4 |
|                              | warming, heat-waves, melting glaciers                        | 4 |
|                              |                                                              | 4 |
| scientists                   | IPCC                                                         | 4 |
| National Meteorological      | We have more extreme weather than in the 1900s, more         | 4 |
| Interview to scientists      | Establish laws with penalties                                | 4 |
| Interview to scientists      | Establish laws with penalties                                | 4 |
|                              | stronger thunderstorms, average of frost is one in several   | 4 |
|                              | Drastic changes in onset of the rains                        | 4 |
|                              |                                                              | 4 |
| Climate Central              | More intense rain / drought situations & bigger rain co      | 4 |
| Organizations such as        | Increased occurrence and severity of extreme weather         | 4 |
|                              | Long term temperature trends averaged across the co          | 4 |
|                              | More extreme Weather events                                  | 4 |
|                              | Warming and more frequent extremes episodes                  | 4 |
|                              | Climate statistics and the trends over decades.              | 4 |
|                              | Changing lifestyles in response to changing climate          | 4 |
|                              | Changes in seasons and rising temperatures                   | 4 |
|                              | annual temperature rise and more frequent hot spells         | 4 |
| Instituto de Investigaciones | The rainy and dry seasons are getting stronger. Agriculture  | 4 |
|                              | Cambios en las temperaturas, sequias mas frecuentes          | 4 |
| Scientific articles          | increase in mean temperatures and decline in precipitation   | 4 |
|                              | Increasing temperatures                                      | 4 |
|                              | Scientific studies with climate data of met stations         | 4 |
| In person (or zoom) meetings | patterns of extremes becoming "common" to public awareness   | 4 |

|                           |                                                            |   |
|---------------------------|------------------------------------------------------------|---|
|                           | drought and floods                                         | 4 |
|                           | Much shorter winters, low snow amounts and meager          | 4 |
|                           | EXTREME DROUGHT                                            | 4 |
|                           | Temperature extremes, number of hot(> 30 °C) and           | 4 |
|                           | Temperature records                                        | 4 |
|                           | Change of flora and especially fauna                       | 4 |
|                           |                                                            | 4 |
|                           | The seasons in recent years have changed a lot.            | 4 |
|                           | Observed trends in meteorological data and ecological      | 4 |
|                           | observed temperature raise                                 | 4 |
|                           | Increase in mean nighttime temperatures.                   | 4 |
|                           | videos and photos of changes                               | 4 |
|                           | More heatwave                                              | 4 |
| Twitter                   | Disaster                                                   | 4 |
|                           | Lack of water                                              | 4 |
|                           | temperture and water abailability                          | 4 |
|                           | Land becoming drier and minimum and maximum tem            | 4 |
| My network of trusted c   | More severe weather in the summer, less snow in the        | 4 |
|                           | Temperatures are frequently slightly higher than the a     | 4 |
|                           | cambios en las temporadas de lluvia/sequia, aumento        | 4 |
|                           | Weather extremes                                           | 4 |
| national weatherservice   | severity of unusual weather-events - heavy precipitati     | 4 |
|                           | Drought, desertification, coastal erosion, extreme tem     | 4 |
|                           |                                                            | 4 |
|                           | Extended droughts/reduced rainfall in areas previousl      | 4 |
| My own experience and     | It is already happening with a noticeable change in the    | 4 |
|                           | Frequent droughts and devastating floods                   | 4 |
|                           | drought and the number of heat records vs the numb         | 4 |
|                           | Increasing of température, onset of rzinfall changed, r    | 4 |
| Some original statistic c | It's very difficult to chose the best indicator as many th | 5 |
|                           | Temperature and Rainfall                                   | 5 |
|                           | Average winter temperature                                 | 5 |
|                           | The last four years with a hurricane near our country      | 5 |
|                           | Warming temperatures, rising sea levels and less sea       | 5 |
|                           | Increasing temperatures, and heat waves in particula       | 5 |
|                           | changed precipitation and seasons (longer growing se       | 5 |
| Peer-reviewed science     | The increase in extreme weather events.                    | 5 |
|                           | The increase in extreme events such as tornadoes, s        | 5 |
|                           | Annual mean temperature rising                             | 5 |
|                           | Increasingly extreme weather events & patterns (it's a     | 5 |
|                           | the thawing of the Andean peaks                            | 5 |
|                           | Los Temporales                                             | 5 |
|                           | Heavy rain events and flooding                             | 5 |
| SMHI Sweden               |                                                            | 5 |
| Climate without Border:   | extremer and longer Heatwaves in Summer                    | 5 |
| Climate Central           | Increase in days with extreme precipitation and days       | 5 |
|                           | Summer season is larger as well as ocean temperatur        | 5 |
|                           | Rise of Temperarure                                        | 5 |

|                                          |                                                                                |   |
|------------------------------------------|--------------------------------------------------------------------------------|---|
| Climate Central, other sources           | Sea level rise, increased drought, wildfires, and floods                       | 5 |
|                                          | Record heat & flooding rains at increasing frequency.                          | 5 |
|                                          | Having local scientific experts disseminate truthful information               | 5 |
|                                          | temperatures, sea level rise                                                   | 5 |
|                                          | rising sea level, sunny-day flooding, record warmth, drought                   | 5 |
|                                          | temperature recordings                                                         | 5 |
| Climate Central                          | Flooding                                                                       | 5 |
|                                          | Melting of the arctic                                                          | 5 |
| Climate Central (NGO)                    | Rising seas, heavier downpours                                                 | 5 |
|                                          | Sea level rise                                                                 | 5 |
|                                          | Permafrost thawing                                                             | 5 |
|                                          | Increase temperature and severe weather impacts                                | 5 |
| my company reports                       | increase temperature                                                           | 5 |
|                                          | The occurrence of extremes, of rainfall, drought, heat waves                   | 5 |
|                                          | The loss of Arctic sea ice.                                                    | 5 |
|                                          | Long-scale observations of the climate change indicators                       | 5 |
|                                          |                                                                                | 5 |
|                                          | more frequent heat, less frequent cold, higher average temperatures            | 5 |
|                                          | Extreme weather events                                                         | 5 |
|                                          | Cambio en el uso de suelos.                                                    | 5 |
|                                          | More active and strong hurricane seasons and severe weather                    | 5 |
|                                          | Heat waves                                                                     | 5 |
|                                          | We are severely affected by monstrous tropical cyclones                        | 5 |
|                                          |                                                                                | 5 |
|                                          | Extreeme events and hazards, changing biodiversity                             | 5 |
|                                          | Snow cover and glacier retreat plus extreme events                             | 5 |
|                                          | Falta de nieve en cordillera y ausencia de olas de frío                        | 5 |
|                                          | Local warming and stromger storms                                              | 5 |
|                                          | Rain distribution & high temperature                                           | 5 |
|                                          | Severe weather conditions                                                      | 5 |
|                                          | scientific reports                                                             | 5 |
|                                          |                                                                                | 5 |
| Satellite data analysis                  | Flash floods/heat waves                                                        | 5 |
|                                          | positive trend of mean annual and decades temperature                          | 5 |
| IPCC and COP Session                     | Trend of surface temperature, sea rise, stronger and longer droughts           | 5 |
|                                          | What has happened in the last 30 years and what is forecasted                  | 5 |
| Peers, on network of climate scientists  | Long episodes of drought, trees dieing, extreme heat waves                     | 5 |
| Peers, on network of climate scientists  | Long episodes of drought, trees dieing, extreme heat waves                     | 5 |
| Specialized websites: climate scientists | Increasing temperatures, increasing heat waves, decreasing rainfall            | 5 |
|                                          | LLUVIAS TORRENCIALES MÁS INTENTAS, GENERALIZACIÓN DE LAS SEVERAS CONDICIONES   | 5 |
| Lectures, public events                  |                                                                                | 5 |
|                                          | Increased severe weather events like typhoons                                  | 5 |
|                                          | Scientific results based on measured data, but also more on anecdotal evidence | 5 |
| Research organizations                   | Sea level rise along coastlines (especiallly Florida)                          | 5 |
|                                          | aumento de las temperaturas, de las lluvias y de eventos extremos              | 5 |
|                                          | Heat waves more often happening!                                               | 5 |
|                                          | Above Average Temperatures                                                     | 5 |
| The current happenings                   | The country is getting drier, with a short rainfall period                     | 5 |

|         |                                                       |    |
|---------|-------------------------------------------------------|----|
|         |                                                       | 5  |
|         | Glacier retreat                                       | 5  |
|         | flooding rains                                        | 5  |
| Ninguna | Sea level advance.More frequent droughts.Increased    | 5  |
|         | Severe weather                                        | 5  |
|         | Variations in Rainfall seasons                        | 5  |
|         | Precipitation type changed                            | 5  |
|         | Increased snow level.                                 | 5  |
|         | La ausencia de heladas. (Temperaturas mínimas caen)   | 5  |
|         | Precipitation and frost changes.                      | 5  |
|         | the rainy season which is late and the heat which exc | 5  |
|         |                                                       | 5  |
|         |                                                       | 7  |
|         |                                                       | 16 |
|         |                                                       | 32 |
|         |                                                       | 69 |
|         |                                                       | 79 |



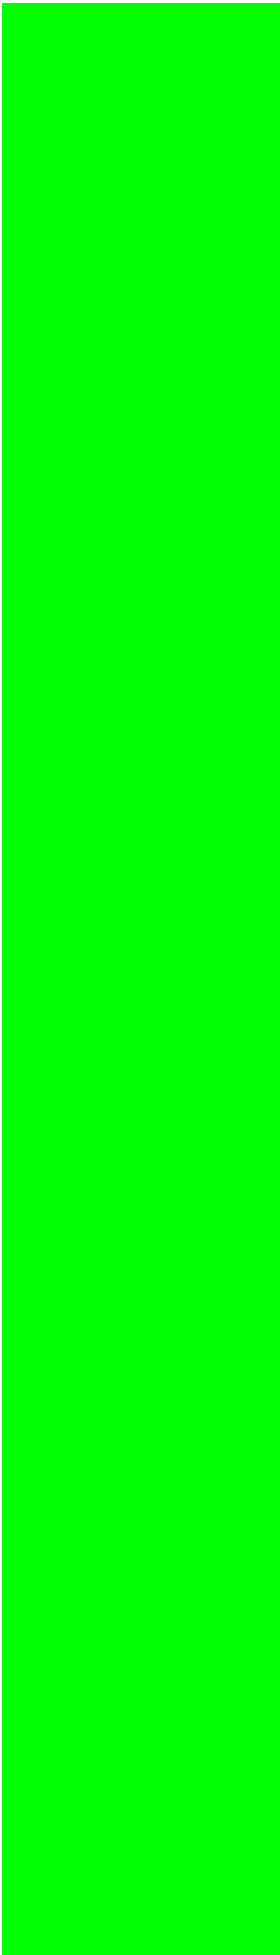

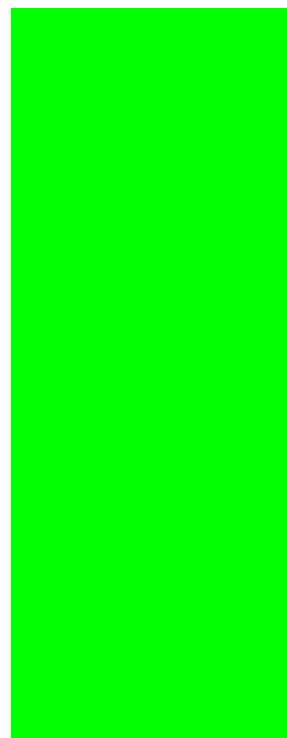

| Please rate your degree |
|-------------------------|-------------------------|-------------------------|-------------------------|
| 1                       | 1                       | 1                       | 1                       |
| 1                       | 5                       | 1                       | 1                       |
| 1                       | 3                       | 1                       | 2                       |
| 2                       | 2                       | 5                       | 5                       |
| 2                       | 3                       | 3                       | 3                       |
| 2                       | 4                       | 4                       | 3                       |
| 1                       | 4                       | 1                       | 1                       |
| 2                       | 2                       | 1                       | 1                       |
| 4                       | 2                       | 2                       | 2                       |
| 2                       | 2                       | 2                       | 2                       |
| 1                       | 1                       | 1                       | 1                       |
| 3                       | 4                       | 4                       | 4                       |
| 2                       | 4                       | 3                       | 3                       |
| 2                       | 2                       | 1                       | 1                       |
| 3                       | 2                       | 1                       | 1                       |
| 2                       | 2                       | 2                       | 2                       |
| 4                       | 3                       | 1                       | 1                       |
| 2                       | 2                       | 1                       | 1                       |
| 2                       | 2                       | 1                       | 1                       |
| 2                       | 1                       | 1                       | 1                       |
| 2                       | 5                       | 3                       | 1                       |
| 2                       | 4                       | 1                       | 1                       |
| 2                       | 4                       | 2                       | 2                       |
| 2                       | 3                       | 1                       | 1                       |
| 3                       | 3                       | 3                       | 1                       |
| 2                       | 3                       | 1                       | 1                       |
| 2                       | 2                       | 1                       | 1                       |
| 4                       | 1                       | 1                       | 1                       |
| 3                       | 5                       | 5                       | 3                       |
| 3                       | 3                       | 2                       | 2                       |
| 3                       | 3                       | 1                       | 2                       |
| 2                       | 5                       | 5                       | 4                       |
| 3                       | 3                       | 1                       | 1                       |
| 3                       | 3                       | 2                       | 2                       |
| 2                       | 3                       | 1                       | 1                       |
| 3                       | 1                       | 1                       | 1                       |
| 2                       | 2                       | 3                       | 1                       |
| 2                       | 3                       | 3                       | 3                       |
| 2                       | 4                       | 4                       | 2                       |
| 4                       | 4                       | 3                       | 4                       |
| 3                       | 2                       | 2                       | 2                       |
| 3                       | 3                       | 3                       | 3                       |
| 3                       | 4                       | 3                       | 2                       |
| 4                       | 4                       | 2                       | 1                       |
| 2                       | 2                       | 1                       | 1                       |
| 3                       | 3                       | 1                       | 1                       |
| 3                       | 2                       | 2                       | 2                       |

|   |   |   |   |
|---|---|---|---|
| 2 | 2 | 2 | 3 |
| 3 | 4 | 2 | 2 |
| 3 | 3 | 2 | 2 |
| 3 | 4 | 1 | 1 |
| 3 | 3 | 5 | 5 |
| 2 | 5 | 4 | 4 |
| 3 | 4 | 4 | 2 |
| 3 | 5 | 3 | 3 |
| 3 | 3 | 3 | 1 |
| 3 | 2 | 1 | 1 |
| 3 | 4 | 1 | 1 |
| 3 | 4 | 1 | 1 |
| 2 | 4 | 1 | 1 |
| 4 | 1 | 1 | 1 |
| 2 | 5 | 4 | 1 |
| 3 | 3 | 2 | 2 |
| 4 | 5 | 2 | 1 |
| 4 | 5 | 2 | 2 |
| 4 | 2 | 1 | 1 |
| 4 | 3 | 4 | 4 |
| 3 | 4 | 3 | 2 |
| 3 | 4 | 2 | 2 |
| 4 | 3 | 1 | 1 |
| 3 | 3 | 5 | 5 |
| 3 | 4 | 1 | 1 |
| 4 | 4 | 1 | 1 |
| 4 | 3 | 2 | 2 |
| 3 | 3 | 1 | 1 |
| 4 | 3 | 3 | 3 |
| 4 | 3 | 3 | 3 |
| 3 | 3 | 1 | 1 |
| 3 | 1 | 1 | 1 |
| 3 | 4 | 3 | 3 |
| 3 | 5 | 3 | 1 |
| 3 | 4 | 4 | 3 |
| 3 | 5 | 3 | 3 |
| 3 | 2 | 1 | 1 |
| 3 | 2 | 2 | 2 |
| 3 | 4 | 2 | 1 |
| 4 | 4 | 1 | 2 |
| 4 | 2 | 2 | 2 |
| 4 | 2 | 2 | 2 |
| 3 | 4 | 1 | 1 |
| 4 | 3 | 2 | 1 |
| 2 | 3 | 3 | 3 |
| 3 | 4 | 1 | 1 |
| 4 | 2 | 2 | 1 |
| 4 | 4 | 1 | 1 |

|   |   |   |   |
|---|---|---|---|
| 2 | 2 | 2 | 2 |
| 4 | 4 | 1 | 1 |
| 2 | 4 | 2 | 2 |
| 2 | 3 | 2 | 2 |
| 4 | 2 | 1 | 1 |
| 3 | 3 | 1 | 1 |
| 4 | 4 | 2 | 1 |
| 3 | 2 | 1 | 1 |
| 4 | 4 | 1 | 1 |
| 3 | 4 | 1 | 1 |
| 4 | 2 | 1 | 1 |
| 3 | 3 | 2 | 2 |
| 3 | 3 | 2 | 2 |
| 3 | 4 | 2 | 3 |
| 3 | 4 | 2 | 1 |
| 4 | 3 | 1 | 1 |
| 2 | 4 | 1 | 1 |
| 4 | 4 | 1 | 1 |
| 3 | 5 | 1 | 1 |
| 3 | 4 | 3 | 1 |
| 3 | 2 | 2 | 2 |
| 3 | 2 | 1 | 1 |
| 3 | 3 | 2 | 2 |
| 2 | 1 | 1 | 1 |
| 4 | 2 | 2 | 2 |
| 3 | 4 | 1 | 1 |
| 3 | 4 | 2 | 2 |
| 3 | 3 | 3 | 1 |
| 4 | 4 | 1 | 1 |
| 4 | 2 | 1 | 1 |
| 3 | 5 | 1 | 1 |
| 3 | 5 | 1 | 2 |
| 5 | 5 | 1 | 1 |
| 4 | 5 | 1 | 1 |
| 4 | 4 | 1 | 2 |
| 3 | 2 | 1 | 1 |
| 5 | 1 | 1 | 1 |
| 3 | 5 | 1 | 1 |
| 2 | 2 | 4 | 1 |
| 3 | 4 | 2 | 1 |
| 5 | 5 | 1 | 1 |
| 4 | 3 | 1 | 1 |
| 4 | 3 | 1 | 1 |
| 4 | 3 | 1 | 1 |
| 3 | 2 | 1 | 1 |
| 4 | 4 | 2 | 2 |
| 3 | 5 | 1 | 1 |
| 5 | 5 | 5 | 1 |

|   |   |   |   |
|---|---|---|---|
| 4 | 4 | 2 | 2 |
| 3 | 2 | 1 | 2 |
| 2 | 3 | 2 | 1 |
| 4 | 3 | 1 | 1 |
| 4 | 4 | 1 | 1 |
| 3 | 4 | 1 | 1 |
| 3 | 3 | 1 | 1 |
| 3 | 4 | 1 | 1 |
| 4 | 4 | 4 | 4 |
| 5 | 5 | 1 | 1 |
| 3 | 3 | 1 | 2 |
| 3 | 2 | 1 | 1 |
| 5 | 4 | 3 | 3 |
| 3 | 4 | 1 | 1 |
| 3 | 5 | 3 | 1 |
| 4 | 3 | 1 | 1 |
| 3 | 5 | 1 | 1 |
| 2 | 2 | 1 | 3 |
| 4 | 2 | 1 | 1 |
| 5 | 5 | 2 | 2 |
| 4 | 4 | 1 | 1 |
| 2 | 4 | 1 | 1 |
| 5 | 1 | 1 | 1 |
| 4 | 4 | 1 | 1 |
| 4 | 5 | 1 | 1 |
| 4 | 5 | 1 | 1 |
| 4 | 4 | 1 | 1 |
| 4 | 4 | 2 | 1 |
| 4 | 3 | 1 | 2 |
| 4 | 3 | 2 | 1 |
| 5 | 5 | 1 | 1 |
| 5 | 1 | 1 | 1 |
| 3 | 1 | 1 | 1 |
| 4 | 4 | 1 | 1 |
| 5 | 3 | 1 | 1 |
| 4 | 4 | 1 | 1 |
| 3 | 4 | 1 | 2 |
| 3 | 4 | 1 | 2 |
| 2 | 4 | 1 | 1 |
| 4 | 2 | 1 | 1 |
| 3 | 4 | 1 | 1 |
| 4 | 3 | 3 | 2 |
| 3 | 3 | 2 | 1 |
| 4 | 4 | 2 | 3 |
| 5 | 5 | 5 | 5 |
| 3 | 5 | 1 | 1 |
| 5 | 1 | 1 | 1 |
| 5 | 2 | 2 | 1 |

|    |    |     |     |
|----|----|-----|-----|
| 4  | 3  | 3   | 3   |
| 4  | 5  | 1   | 1   |
| 3  | 5  | 2   | 3   |
| 4  | 5  | 2   | 2   |
| 4  | 3  | 1   | 1   |
| 4  | 4  | 1   | 1   |
| 3  | 1  | 1   | 1   |
| 5  | 5  | 4   | 5   |
| 3  | 4  | 2   | 2   |
| 2  | 1  | 1   | 1   |
| 5  | 1  | 5   | 1   |
| 3  | 2  | 1   | 1   |
| 5  | 16 | 112 | 126 |
| 39 | 40 | 48  | 46  |
| 82 | 50 | 24  | 20  |
| 61 | 64 | 11  | 6   |
| 16 | 33 | 8   | 5   |







| How often do you report |
|-------------------------|-------------------------|-------------------------|-------------------------|
| Never                   | Sporadically            | Never                   | Never                   |
| Never                   | Never                   | Never                   | Weekly                  |
| Every day               | Sporadically            | Monthly                 | Monthly                 |
| Monthly                 | Weekly                  | Monthly                 | Weekly                  |
| Never                   | Never                   | Monthly                 | Weekly                  |
| Sporadically            | Sporadically            | Sporadically            | Sporadically            |
| Never                   | Never                   | Never                   | Never                   |
| Sporadically            | Sporadically            | Sporadically            | Sporadically            |
| Sporadically            | Sporadically            | Sporadically            | Sporadically            |
| Sporadically            | Sporadically            | Sporadically            | Sporadically            |
| Never                   | Never                   | Sporadically            | Sporadically            |
| Never                   | Sporadically            | Never                   | Never                   |
| Sporadically            | Never                   | Never                   | Never                   |
| Sporadically            | Sporadically            | Sporadically            | Sporadically            |
| Sporadically            | Sporadically            | Never                   | Sporadically            |
| Sporadically            | Sporadically            | Sporadically            | Sporadically            |
| Never                   | Never                   | Sporadically            | Sporadically            |
| Sporadically            | Sporadically            | Sporadically            | Sporadically            |
| Sporadically            | Sporadically            | Sporadically            | Sporadically            |
| Every day               | Monthly                 | Weekly                  | Every day               |
| Sporadically            | Sporadically            | Sporadically            | Never                   |
| Sporadically            | Sporadically            | Never                   | Never                   |
| Never                   | Never                   | Sporadically            | Sporadically            |
| Sporadically            | Monthly                 | Weekly                  | Monthly                 |
| Sporadically            | Sporadically            | Sporadically            | Sporadically            |
| Monthly                 | Sporadically            | Sporadically            | Sporadically            |
| Sporadically            | Sporadically            | Monthly                 | Weekly                  |
| Monthly                 | Monthly                 | Monthly                 | Never                   |
| Sporadically            | Sporadically            | Sporadically            | Sporadically            |
| Never                   | Sporadically            | Sporadically            | Sporadically            |
| Monthly                 | Sporadically            | Weekly                  | Every day               |
| Sporadically            | Sporadically            | Sporadically            | Monthly                 |
| Every day               | Every day               | Monthly                 | Sporadically            |
| Sporadically            | Never                   | Never                   | Sporadically            |
| Sporadically            | Sporadically            | Sporadically            | Sporadically            |
| Sporadically            | Weekly                  | Sporadically            | Sporadically            |
| Never                   | Sporadically            | Sporadically            | Never                   |
| Sporadically            | Sporadically            | Never                   | Monthly                 |
| Sporadically            | Sporadically            | Sporadically            | Sporadically            |
| Sporadically            | Sporadically            | Sporadically            | Sporadically            |
| Sporadically            | Sporadically            | Sporadically            | Sporadically            |
| Sporadically            | Sporadically            | Sporadically            | Sporadically            |
| Sporadically            | Never                   | Monthly                 | Never                   |
| Sporadically            | Sporadically            | Sporadically            | Sporadically            |
| Never                   | Monthly                 | Sporadically            | Sporadically            |
| Sporadically            | Sporadically            | Sporadically            | Sporadically            |
| Sporadically            | Sporadically            | Sporadically            | Sporadically            |

|              |              |              |              |
|--------------|--------------|--------------|--------------|
| Sporadically | Never        | Sporadically | Sporadically |
| Sporadically | Weekly       | Monthly      | Monthly      |
| Sporadically | Monthly      | Monthly      | Monthly      |
| Sporadically | Sporadically | Sporadically | Sporadically |
| Sporadically | Never        | Never        | Sporadically |
| Sporadically | Sporadically | Sporadically | Every day    |
| Sporadically | Never        | Weekly       | Weekly       |
| Sporadically | Sporadically | Sporadically | Sporadically |
| Weekly       | Weekly       | Weekly       | Weekly       |
| Monthly      | Sporadically | Weekly       | Monthly      |
| Sporadically | Sporadically | Sporadically | Sporadically |
| Sporadically | Sporadically | Sporadically | Sporadically |
| Monthly      | Sporadically | Monthly      | Never        |
| Weekly       | Sporadically | Monthly      | Monthly      |
| Monthly      | Sporadically | Monthly      | Monthly      |
| Sporadically | Sporadically | Sporadically | Sporadically |
| Monthly      | Never        | Sporadically | Sporadically |
| Sporadically | Sporadically | Sporadically | Sporadically |
| Sporadically | Sporadically | Weekly       | Weekly       |
| Weekly       | Every day    | Weekly       | Every day    |
| Monthly      | Sporadically | Monthly      | Weekly       |
| Every day    | Weekly       | Weekly       | Sporadically |
| Sporadically | Sporadically | Sporadically | Sporadically |
| Monthly      | Monthly      | Weekly       | Weekly       |
| Sporadically | Weekly       | Weekly       | Sporadically |
| Weekly       | Weekly       | Weekly       | Monthly      |
| Sporadically | Sporadically | Weekly       | Weekly       |
| Monthly      | Sporadically | Sporadically | Sporadically |
| Weekly       | Weekly       | Weekly       | Weekly       |
| Weekly       | Weekly       | Weekly       | Weekly       |
| Monthly      | Monthly      | Never        | Never        |
| Monthly      | Sporadically | Sporadically | Monthly      |
| Sporadically | Never        | Monthly      | Monthly      |
| Weekly       | Sporadically | Sporadically | Weekly       |
| Never        | Sporadically | Sporadically | Weekly       |
| Monthly      | Sporadically | Monthly      | Monthly      |
| Monthly      | Monthly      | Weekly       | Weekly       |
| Monthly      | Never        | Monthly      | Monthly      |
| Never        | Sporadically | Sporadically | Sporadically |
| Monthly      | Sporadically | Sporadically | Sporadically |
| Sporadically | Monthly      | Never        | Never        |
| Weekly       | Sporadically | Monthly      | Weekly       |
| Monthly      | Never        | Monthly      | Monthly      |
| Sporadically | Sporadically | Sporadically | Sporadically |
| Sporadically | Sporadically | Never        | Monthly      |
| Weekly       | Monthly      | Weekly       | Monthly      |
| Sporadically | Sporadically | Sporadically | Monthly      |
| Monthly      | Sporadically | Monthly      | Weekly       |

|              |              |              |              |
|--------------|--------------|--------------|--------------|
| Every day    | Sporadically | Sporadically | Weekly       |
| Sporadically | Sporadically | Sporadically | Sporadically |
| Sporadically | Never        | Sporadically | Sporadically |
| Sporadically | Sporadically | Never        | Never        |
| Never        | Sporadically | Weekly       | Sporadically |
| Sporadically | Sporadically | Sporadically | Never        |
| Sporadically | Never        | Sporadically | Sporadically |
| Monthly      | Sporadically | Monthly      | Monthly      |
| Never        | Sporadically | Never        | Monthly      |
| Weekly       | Monthly      | Weekly       | Weekly       |
| Sporadically | Sporadically | Never        | Sporadically |
| Monthly      | Sporadically | Sporadically | Sporadically |
| Monthly      | Sporadically | Monthly      | Sporadically |
| Sporadically | Sporadically | Sporadically | Sporadically |
| Weekly       | Monthly      | Monthly      | Every day    |
| Weekly       | Sporadically | Weekly       | Weekly       |
| Weekly       | Never        | Sporadically | Sporadically |
| Sporadically | Sporadically | Monthly      | Monthly      |
| Sporadically | Sporadically | Sporadically | Sporadically |
| Sporadically | Sporadically | Sporadically | Sporadically |
| Sporadically | Sporadically | Sporadically | Sporadically |
| Sporadically | Sporadically | Sporadically | Sporadically |
| Weekly       | Never        | Every day    | Weekly       |
| Every day    | Monthly      | Never        | Never        |
| Sporadically | Never        | Sporadically | Sporadically |
| Sporadically | Sporadically | Sporadically | Sporadically |
| Sporadically | Sporadically | Sporadically | Never        |
| Monthly      | Sporadically | Monthly      | Monthly      |
| Weekly       | Weekly       | Every day    | Every day    |
| Weekly       | Sporadically | Sporadically | Sporadically |
| Never        | Sporadically | Monthly      | Monthly      |
| Never        | Monthly      | Weekly       | Weekly       |
| Weekly       | Weekly       | Every day    | Weekly       |
| Monthly      | Sporadically | Monthly      | Weekly       |
| Weekly       | Monthly      | Weekly       | Weekly       |
| Weekly       | Sporadically | Weekly       | Weekly       |
| Weekly       | Weekly       | Weekly       | Weekly       |
| Weekly       | Sporadically | Every day    | Every day    |
| Sporadically | Weekly       | Sporadically | Monthly      |
| Weekly       | Sporadically | Sporadically | Every day    |
| Sporadically | Sporadically | Monthly      | Weekly       |
| Weekly       | Weekly       | Weekly       | Weekly       |
| Weekly       | Sporadically | Monthly      | Weekly       |
| Monthly      | Monthly      | Monthly      | Monthly      |
| Weekly       | Sporadically | Weekly       | Every day    |
| Sporadically | Monthly      | Sporadically | Sporadically |
| Weekly       | Monthly      | Weekly       | Weekly       |
| Weekly       | Never        | Weekly       | Every day    |

|              |              |              |              |
|--------------|--------------|--------------|--------------|
| Weekly       | Sporadically | Weekly       | Weekly       |
| Weekly       | Weekly       | Every day    | Every day    |
| Monthly      | Sporadically | Sporadically | Monthly      |
| Weekly       | Weekly       | Monthly      | Monthly      |
| Weekly       | Weekly       | Weekly       | Weekly       |
| Weekly       | Sporadically | Weekly       | Weekly       |
| Monthly      | Never        | Weekly       | Weekly       |
| Weekly       | Monthly      | Weekly       | Weekly       |
| Weekly       | Weekly       | Weekly       | Weekly       |
| Weekly       | Sporadically | Sporadically | Every day    |
| Sporadically | Monthly      | Weekly       | Weekly       |
| Every day    | Monthly      | Weekly       | Weekly       |
| Sporadically | Sporadically | Sporadically | Sporadically |
| Never        | Sporadically | Monthly      | Weekly       |
| Sporadically | Weekly       | Weekly       | Weekly       |
| Monthly      | Sporadically | Sporadically | Monthly      |
| Never        | Every day    | Every day    | Every day    |
| Monthly      | Monthly      | Weekly       | Weekly       |
| Sporadically | Sporadically | Weekly       | Every day    |
| Weekly       | Weekly       | Weekly       | Weekly       |
| Monthly      | Sporadically | Monthly      | Monthly      |
| Monthly      | Monthly      | Sporadically | Sporadically |
| Weekly       | Monthly      | Every day    | Sporadically |
| Weekly       | Weekly       | Monthly      | Monthly      |
| Sporadically | Sporadically | Sporadically | Sporadically |
| Weekly       | Weekly       | Sporadically | Weekly       |
| Never        | Never        | Weekly       | Weekly       |
| Weekly       | Sporadically | Sporadically | Sporadically |
| Every day    | Monthly      | Every day    | Every day    |
| Every day    | Weekly       | Weekly       | Every day    |
| Sporadically | Sporadically | Monthly      | Weekly       |
| Every day    | Every day    | Every day    | Every day    |
| Every day    | Weekly       | Weekly       | Every day    |
| Weekly       | Monthly      | Monthly      | Monthly      |
| Sporadically | Weekly       | Monthly      | Sporadically |
| Monthly      | Sporadically | Monthly      | Monthly      |
| Sporadically | Monthly      | Monthly      | Monthly      |
| Sporadically | Monthly      | Monthly      | Monthly      |
| Monthly      | Sporadically | Sporadically | Every day    |
| Every day    | Monthly      | Sporadically | Every day    |
| Weekly       | Sporadically | Sporadically | Sporadically |
| Monthly      | Sporadically | Weekly       | Weekly       |
| Sporadically | Sporadically | Sporadically | Weekly       |
| Monthly      | Never        | Weekly       | Monthly      |
| Weekly       | Weekly       | Every day    | Weekly       |
| Every day    | Monthly      | Every day    | Every day    |
| Monthly      | Sporadically | Weekly       | Weekly       |
| Weekly       | Sporadically | Weekly       | Weekly       |



the 1990s, the number of people in the UK who are aged 65 and over has increased by 1.5 million (1990–2000) and is projected to increase by a further 1.5 million by 2020 (Office for National Statistics, 2001). The number of people aged 65 and over is projected to increase by 2.5 million by 2020 in the USA (U.S. Census Bureau, 2000).

There is a growing awareness of the need to develop strategies to meet the needs of the ageing population. The World Health Organization (1999) has identified the need to develop strategies to meet the needs of the ageing population. The World Health Organization (1999) has identified the need to develop strategies to meet the needs of the ageing population.

The World Health Organization (1999) has identified the need to develop strategies to meet the needs of the ageing population. The World Health Organization (1999) has identified the need to develop strategies to meet the needs of the ageing population.

The World Health Organization (1999) has identified the need to develop strategies to meet the needs of the ageing population. The World Health Organization (1999) has identified the need to develop strategies to meet the needs of the ageing population.

The World Health Organization (1999) has identified the need to develop strategies to meet the needs of the ageing population. The World Health Organization (1999) has identified the need to develop strategies to meet the needs of the ageing population.

The World Health Organization (1999) has identified the need to develop strategies to meet the needs of the ageing population. The World Health Organization (1999) has identified the need to develop strategies to meet the needs of the ageing population.

The World Health Organization (1999) has identified the need to develop strategies to meet the needs of the ageing population. The World Health Organization (1999) has identified the need to develop strategies to meet the needs of the ageing population.

The World Health Organization (1999) has identified the need to develop strategies to meet the needs of the ageing population. The World Health Organization (1999) has identified the need to develop strategies to meet the needs of the ageing population.

The World Health Organization (1999) has identified the need to develop strategies to meet the needs of the ageing population. The World Health Organization (1999) has identified the need to develop strategies to meet the needs of the ageing population.





| How often do you report | How often do you report | How often do you report | If you do not report sufficient |
|-------------------------|-------------------------|-------------------------|---------------------------------|
| Monthly                 | Sporadically            | Never                   | 1                               |
| Never                   | Sporadically            | Sporadically            | 1                               |
| Weekly                  | Weekly                  | Monthly                 | 3                               |
| Sporadically            | Sporadically            | Monthly                 | 5                               |
| Never                   | Sporadically            | Never                   | 1                               |
| Sporadically            | Sporadically            | Sporadically            | 3                               |
| Sporadically            | Sporadically            | Sporadically            | 4                               |
| Never                   | Never                   | Never                   | 1                               |
| Sporadically            | Never                   | Never                   | 5                               |
| Monthly                 | Sporadically            | Never                   | 1                               |
| Never                   | Never                   | Never                   | 1                               |
| Never                   | Never                   | Never                   | 2                               |
| Sporadically            | Never                   | Never                   | 3                               |
| Sporadically            | Sporadically            | Sporadically            | 1                               |
| Monthly                 | Monthly                 | Monthly                 | 1                               |
| Sporadically            | Sporadically            | Sporadically            | 4                               |
| Never                   | Never                   | Never                   | 1                               |
| Never                   | Never                   | Never                   | 5                               |
| Never                   | Never                   | Never                   | 5                               |
| Sporadically            | Monthly                 | Monthly                 | 1                               |
| Weekly                  | Every day               | Monthly                 | 1                               |
| Sporadically            | Never                   | Never                   | 2                               |
| Sporadically            | Sporadically            | Sporadically            | 1                               |
| Weekly                  | Weekly                  | Monthly                 | 2                               |
| Sporadically            | Sporadically            | Never                   | 2                               |
| Sporadically            | Monthly                 | Never                   | 2                               |
| Sporadically            | Sporadically            | Sporadically            | 2                               |
| Sporadically            | Sporadically            | Sporadically            | 3                               |
| Monthly                 | Monthly                 | Monthly                 | 2                               |
| Sporadically            | Sporadically            | Never                   | 4                               |
| Every day               | Weekly                  | Every day               | 2                               |
| Sporadically            | Monthly                 | Sporadically            | 1                               |
| Sporadically            | Sporadically            | Sporadically            | 2                               |
| Sporadically            | Never                   | Never                   | 1                               |
| Monthly                 | Monthly                 | Sporadically            | 4                               |
| Sporadically            | Never                   | Sporadically            | 4                               |
| Sporadically            | Never                   | Never                   | 1                               |
| Weekly                  | Weekly                  | Never                   | 4                               |
| Sporadically            | Sporadically            | Sporadically            | 3                               |
| Never                   | Sporadically            | Never                   | 4                               |
| Monthly                 | Monthly                 | Sporadically            | 1                               |
| Sporadically            | Sporadically            | Sporadically            | 4                               |
| Sporadically            | Sporadically            | Sporadically            | 4                               |
| Every day               | Sporadically            | Every day               | 1                               |
| Sporadically            | Sporadically            | Never                   | 1                               |
| Sporadically            | Sporadically            | Sporadically            | 1                               |
| Sporadically            | Sporadically            | Sporadically            | 4                               |

|              |              |              |   |
|--------------|--------------|--------------|---|
| Sporadically | Never        | Never        | 2 |
| Sporadically | Never        | Never        | 5 |
| Weekly       | Weekly       | Monthly      | 3 |
| Sporadically | Sporadically | Sporadically | 4 |
| Sporadically | Never        | Never        | 3 |
| Sporadically | Monthly      | Sporadically | 1 |
| Monthly      | Sporadically | Never        | 2 |
| Sporadically | Sporadically | Sporadically | 4 |
| Monthly      | Monthly      | Monthly      | 3 |
| Never        | Never        | Never        | 5 |
| Sporadically | Never        | Never        | 4 |
| Sporadically | Never        | Never        | 4 |
| Sporadically | Sporadically | Never        | 5 |
| Never        | Never        | Never        | 5 |
| Sporadically | Sporadically | Never        | 2 |
| Monthly      | Monthly      | Sporadically | 4 |
| Never        | Never        | Never        | 5 |
| Sporadically | Sporadically | Sporadically | 1 |
| Sporadically | Sporadically | Never        | 4 |
| Monthly      | Weekly       | Monthly      | 4 |
| Weekly       | Weekly       | Weekly       | 2 |
| Monthly      | Sporadically | Sporadically | 3 |
| Sporadically | Sporadically | Sporadically | 4 |
| Sporadically | Sporadically | Never        | 1 |
| Sporadically | Never        | Never        | 4 |
| Never        | Never        | Never        | 1 |
| Sporadically | Weekly       | Sporadically | 2 |
| Never        | Never        | Never        | 4 |
| Sporadically | Sporadically | Never        | 3 |
| Sporadically | Sporadically | Never        | 3 |
| Never        | Never        | Never        | 1 |
| Monthly      | Monthly      | Monthly      | 4 |
| Sporadically | Sporadically | Sporadically | 3 |
| Sporadically | Sporadically | Sporadically | 3 |
| Never        | Never        | Never        | 1 |
| Weekly       | Weekly       | Sporadically | 4 |
| Monthly      | Monthly      | Sporadically | 5 |
| Sporadically | Sporadically | Sporadically | 4 |
| Sporadically | Sporadically | Never        | 4 |
| Sporadically | Sporadically | Sporadically | 2 |
| Monthly      | Weekly       | Never        | 2 |
| Sporadically | Weekly       | Never        | 5 |
| Never        | Never        | Never        | 3 |
| Sporadically | Sporadically | Never        | 1 |
| Sporadically | Monthly      | Monthly      | 5 |
| Monthly      | Monthly      | Monthly      | 4 |
| Monthly      | Monthly      | Never        | 2 |
| Weekly       | Monthly      | Sporadically | 1 |

|              |              |              |   |
|--------------|--------------|--------------|---|
| Sporadically | Sporadically | Sporadically | 2 |
| Sporadically | Sporadically | Sporadically | 4 |
| Sporadically | Never        | Never        | 4 |
| Sporadically | Sporadically | Sporadically | 1 |
| Sporadically | Never        | Never        | 4 |
| Never        | Sporadically | Never        | 3 |
| Sporadically | Sporadically | Sporadically | 4 |
| Sporadically | Sporadically | Sporadically | 1 |
| Weekly       | Never        | Never        | 5 |
| Sporadically | Sporadically | Never        | 4 |
| Monthly      | Monthly      | Sporadically | 4 |
| Sporadically | Sporadically | Never        | 4 |
| Sporadically | Never        | Never        | 4 |
| Sporadically | Sporadically | Sporadically | 2 |
| Monthly      | Sporadically | Sporadically | 2 |
| Sporadically | Sporadically | Sporadically | 3 |
| Never        | Never        | Never        | 3 |
| Sporadically | Monthly      | Monthly      | 2 |
| Sporadically | Never        | Never        | 5 |
| Never        | Never        | Never        | 4 |
| Sporadically | Sporadically | Never        | 2 |
| Never        | Never        | Every day    | 5 |
| Sporadically | Sporadically | Never        | 1 |
| Never        | Never        | Never        | 1 |
| Sporadically | Sporadically | Sporadically | 4 |
| Sporadically | Sporadically | Sporadically | 2 |
| Sporadically | Sporadically | Sporadically | 4 |
| Sporadically | Monthly      | Sporadically | 1 |
| Never        | Sporadically | Never        | 2 |
| Weekly       | Sporadically | Never        | 4 |
| Never        | Never        | Never        | 5 |
| Sporadically | Sporadically | Sporadically | 1 |
| Monthly      | Never        | Never        | 1 |
| Monthly      | Never        | Never        | 1 |
| Sporadically | Sporadically | Sporadically | 4 |
| Monthly      | Weekly       | Monthly      | 5 |
| Monthly      | Monthly      | Sporadically | 1 |
| Weekly       | Every day    | Never        | 5 |
| Sporadically | Sporadically | Sporadically | 4 |
| Sporadically | Sporadically | Never        | 1 |
| Sporadically | Sporadically | Never        | 1 |
| Never        | Weekly       | Never        | 4 |
| Every day    | Sporadically | Never        | 1 |
| Sporadically | Sporadically | Never        | 4 |
| Sporadically | Weekly       | Monthly      | 1 |
| Sporadically | Sporadically | Sporadically | 4 |
| Never        | Sporadically | Sporadically | 2 |
| Sporadically | Sporadically | Never        | 3 |

|              |              |              |   |
|--------------|--------------|--------------|---|
| Monthly      | Monthly      | Sporadically | 4 |
| Sporadically | Sporadically | Sporadically | 5 |
| Every day    | Every day    | Weekly       | 4 |
| Sporadically | Monthly      | Never        | 4 |
| Never        | Never        | Never        | 1 |
| Sporadically | Weekly       | Sporadically | 1 |
| Sporadically | Sporadically | Never        | 1 |
| Sporadically | Monthly      | Sporadically | 5 |
| Monthly      | Sporadically | Sporadically | 5 |
| Sporadically | Sporadically | Sporadically | 1 |
| Sporadically | Sporadically | Never        | 4 |
| Weekly       | Monthly      | Monthly      | 1 |
| Sporadically | Weekly       | Sporadically | 4 |
| Sporadically | Sporadically | Sporadically | 2 |
| Never        | Sporadically | Sporadically | 1 |
| Sporadically | Sporadically | Sporadically | 4 |
| Every day    | Every day    | Never        | 3 |
| Monthly      | Monthly      | Monthly      | 3 |
| Sporadically | Monthly      | Never        | 5 |
| Weekly       | Monthly      | Monthly      | 2 |
| Sporadically | Never        | Never        | 5 |
| Every day    | Sporadically | Never        | 4 |
| Sporadically | Sporadically | Sporadically | 3 |
| Never        | Sporadically | Sporadically | 1 |
| Sporadically | Sporadically | Sporadically | 4 |
| Sporadically | Sporadically | Never        | 4 |
| Never        | Never        | Never        | 3 |
| Sporadically | Sporadically | Sporadically | 4 |
| Weekly       | Weekly       | Weekly       | 2 |
| Sporadically | Sporadically | Monthly      | 1 |
| Monthly      | Weekly       | Sporadically | 4 |
| Never        | Never        | Never        | 5 |
| Sporadically | Monthly      | Sporadically | 5 |
| Sporadically | Sporadically | Sporadically | 4 |
| Sporadically | Monthly      | Sporadically | 1 |
| Monthly      | Sporadically | Sporadically | 5 |
| Monthly      | Monthly      | Monthly      | 3 |
| Monthly      | Monthly      | Monthly      | 3 |
| Sporadically | Monthly      | Never        | 4 |
| Sporadically | Monthly      | Never        | 5 |
| Sporadically | Sporadically | Sporadically | 4 |
| Sporadically | Sporadically | Sporadically | 3 |
| Sporadically | Sporadically | Never        | 4 |
| Never        | Never        | Never        | 4 |
| Monthly      | Monthly      | Monthly      | 3 |
| Sporadically | Sporadically | Sporadically | 1 |
| Sporadically | Sporadically | Sporadically | 1 |
| Sporadically | Never        | Sporadically | 2 |

|              |              |              |    |    |
|--------------|--------------|--------------|----|----|
| Monthly      | Weekly       | Monthly      | 2  |    |
| Weekly       | Every day    | Monthly      | 2  |    |
| Never        | Sporadically | Sporadically | 3  |    |
| Sporadically | Sporadically | Sporadically | 3  |    |
| Monthly      | Sporadically | Sporadically | 3  |    |
| Sporadically | Sporadically | Never        | 1  |    |
| Monthly      | Monthly      | Sporadically | 1  |    |
| Every day    | Every day    | Every day    | 1  |    |
| Sporadically | Never        | Never        | 1  |    |
| Sporadically | Sporadically | Never        | 4  |    |
| Never        | Never        | Never        | 2  |    |
| Weekly       | Weekly       | Weekly       | 5  |    |
|              | 34           | 46           | 90 | 55 |
|              | 113          | 96           | 80 | 32 |
|              | 33           | 35           | 25 | 29 |
|              | 16           | 20           | 4  | 59 |
|              | 7            | 6            | 4  | 28 |





If you do not report suff If you do not report suff If you do not report suff If you do not report sufficiently on

|   |   |   |   |
|---|---|---|---|
| 1 | 1 | 1 | 1 |
| 1 | 1 | 1 | 1 |
| 3 | 3 | 1 | 1 |
| 2 | 2 | 5 | 5 |
| 2 | 2 | 2 | 2 |
| 4 | 2 | 4 | 4 |
| 2 | 3 | 2 | 2 |
| 2 | 2 | 4 | 4 |
| 4 | 4 | 3 | 2 |
| 2 | 2 | 2 | 2 |
| 1 | 3 | 1 | 1 |
| 2 | 2 | 2 | 2 |
| 1 | 1 | 1 | 1 |
| 1 | 1 | 1 | 1 |
| 2 | 3 | 3 | 1 |
| 4 | 3 | 3 | 3 |
| 4 | 3 | 3 | 2 |
| 5 | 3 | 3 | 4 |
| 5 | 3 | 3 | 4 |
| 1 | 1 | 1 | 1 |
| 1 | 1 | 1 | 1 |
| 4 | 2 | 3 | 3 |
| 4 | 1 | 4 | 3 |
| 1 | 2 | 3 | 3 |
| 1 | 1 | 2 | 3 |
| 1 | 2 | 1 | 1 |
| 1 | 1 | 1 | 1 |
| 1 | 1 | 1 | 1 |
| 2 | 2 | 4 | 4 |
| 2 | 2 | 2 | 2 |
| 1 | 2 | 2 | 1 |
| 3 | 4 | 4 | 4 |
| 1 | 1 | 1 | 1 |
| 1 | 2 | 2 | 2 |
| 2 | 3 | 3 | 3 |
| 2 | 1 | 1 | 1 |
| 1 | 1 | 1 | 1 |
| 3 | 4 | 3 | 3 |
| 3 | 3 | 1 | 1 |
| 3 | 4 | 3 | 3 |
| 1 | 2 | 1 | 1 |
| 4 | 3 | 3 | 3 |
| 3 | 3 | 2 | 2 |
| 1 | 1 | 1 | 1 |
| 5 | 1 | 1 | 1 |
| 3 | 3 | 1 | 1 |
| 4 | 3 | 3 | 3 |



|   |   |   |   |
|---|---|---|---|
| 3 | 2 | 3 | 2 |
| 3 | 1 | 4 | 2 |
| 3 | 4 | 3 | 3 |
| 3 | 3 | 3 | 3 |
| 3 | 3 | 3 | 3 |
| 1 | 1 | 1 | 1 |
| 3 | 2 | 2 | 2 |
| 3 | 3 | 3 | 2 |
| 1 | 3 | 3 | 3 |
| 1 | 1 | 1 | 1 |
| 1 | 1 | 1 | 1 |
| 1 | 1 | 1 | 1 |
| 1 | 1 | 1 | 1 |
| 4 | 1 | 1 | 1 |
| 1 | 1 | 2 | 3 |
| 2 | 2 | 1 | 2 |
| 2 | 1 | 1 | 1 |
| 1 | 1 | 1 | 1 |
| 2 | 1 | 1 | 1 |
| 4 | 3 | 4 | 4 |
| 3 | 4 | 3 | 4 |
| 4 | 2 | 2 | 1 |
| 1 | 1 | 1 | 1 |
| 3 | 2 | 3 | 2 |
| 1 | 1 | 1 | 1 |
| 1 | 1 | 1 | 1 |
| 2 | 2 | 2 | 2 |
| 2 | 2 | 1 | 1 |
| 3 | 2 | 3 | 3 |
| 3 | 2 | 3 | 3 |
| 1 | 1 | 3 | 1 |
| 1 | 1 | 1 | 1 |
| 3 | 3 | 3 | 3 |
| 3 | 3 | 2 | 1 |
| 3 | 1 | 1 | 1 |
| 4 | 4 | 1 | 1 |
| 1 | 2 | 1 | 1 |
| 2 | 2 | 2 | 3 |
| 3 | 3 | 3 | 3 |
| 2 | 2 | 2 | 2 |
| 2 | 2 | 2 | 1 |
| 5 | 5 | 1 | 1 |
| 2 | 3 | 3 | 3 |
| 1 | 1 | 1 | 1 |
| 2 | 3 | 1 | 1 |
| 2 | 2 | 1 | 1 |
| 4 | 2 | 2 | 1 |
| 1 | 1 | 3 | 3 |

|   |   |   |   |
|---|---|---|---|
| 2 | 2 | 2 | 2 |
| 2 | 2 | 1 | 1 |
| 3 | 3 | 3 | 3 |
| 2 | 2 | 2 | 2 |
| 3 | 4 | 1 | 1 |
| 3 | 3 | 1 | 1 |
| 3 | 2 | 3 | 2 |
| 4 | 3 | 3 | 3 |
| 3 | 2 | 2 | 1 |
| 2 | 3 | 3 | 2 |
| 5 | 3 | 1 | 1 |
| 2 | 2 | 2 | 2 |
| 3 | 3 | 3 | 3 |
| 2 | 2 | 2 | 2 |
| 4 | 2 | 3 | 3 |
| 1 | 3 | 1 | 1 |
| 2 | 2 | 1 | 1 |
| 1 | 1 | 1 | 1 |
| 3 | 2 | 3 | 1 |
| 5 | 3 | 5 | 4 |
| 1 | 2 | 2 | 2 |
| 5 | 2 | 5 | 3 |
| 1 | 1 | 1 | 1 |
| 1 | 2 | 1 | 1 |
| 4 | 3 | 3 | 3 |
| 2 | 2 | 2 | 1 |
| 4 | 3 | 3 | 3 |
| 2 | 1 | 1 | 1 |
| 2 | 2 | 2 | 3 |
| 4 | 3 | 3 | 2 |
| 1 | 3 | 1 | 1 |
| 3 | 1 | 1 | 1 |
| 1 | 1 | 1 | 1 |
| 1 | 1 | 1 | 1 |
| 1 | 1 | 1 | 1 |
| 1 | 1 | 1 | 1 |
| 1 | 1 | 1 | 5 |
| 3 | 2 | 1 | 1 |
| 4 | 2 | 4 | 2 |
| 1 | 1 | 1 | 3 |
| 1 | 1 | 1 | 1 |
| 1 | 1 | 1 | 1 |
| 3 | 1 | 1 | 1 |
| 2 | 1 | 1 | 1 |
| 4 | 2 | 3 | 3 |
| 2 | 1 | 1 | 1 |
| 1 | 1 | 1 | 1 |

|   |   |   |   |
|---|---|---|---|
| 2 | 2 | 2 | 2 |
| 2 | 2 | 2 | 2 |
| 2 | 4 | 3 | 3 |
| 2 | 2 | 2 | 1 |
| 1 | 1 | 1 | 1 |
| 2 | 3 | 1 | 1 |
| 1 | 1 | 1 | 1 |
| 3 | 2 | 2 | 1 |
| 4 | 4 | 4 | 1 |
| 1 | 1 | 1 | 1 |
| 2 | 2 | 1 | 1 |
| 1 | 1 | 1 | 1 |
| 3 | 3 | 3 | 3 |
| 3 | 2 | 1 | 1 |
| 2 | 3 | 3 | 3 |
| 1 | 1 | 1 | 1 |
| 3 | 1 | 3 | 1 |
| 2 | 2 | 1 | 1 |
| 4 | 2 | 1 | 1 |
| 1 | 1 | 1 | 1 |
| 4 | 1 | 1 | 1 |
| 1 | 1 | 1 | 1 |
| 3 | 3 | 3 | 3 |
| 1 | 4 | 1 | 1 |
| 3 | 3 | 3 | 3 |
| 1 | 1 | 1 | 1 |
| 2 | 4 | 1 | 1 |
| 2 | 3 | 2 | 2 |
| 3 | 2 | 4 | 3 |
| 2 | 3 | 3 | 3 |
| 1 | 1 | 1 | 1 |
| 2 | 2 | 3 | 3 |
| 1 | 1 | 1 | 1 |
| 1 | 1 | 1 | 1 |
| 2 | 2 | 2 | 1 |
| 5 | 4 | 2 | 1 |
| 5 | 4 | 2 | 1 |
| 5 | 1 | 2 | 1 |
| 1 | 1 | 1 | 1 |
| 3 | 2 | 3 | 2 |
| 3 | 2 | 2 | 2 |
| 3 | 3 | 3 | 3 |
| 2 | 2 | 2 | 2 |
| 4 | 4 | 4 | 5 |
| 1 | 1 | 1 | 1 |
| 1 | 1 | 1 | 1 |
| 2 | 2 | 2 | 2 |

|    |    |    |     |
|----|----|----|-----|
| 3  | 3  | 3  | 2   |
| 1  | 1  | 1  | 1   |
| 3  | 1  | 2  | 1   |
| 3  | 3  | 3  | 3   |
| 1  | 2  | 1  | 1   |
| 1  | 1  | 1  | 1   |
| 5  | 5  | 5  | 1   |
| 1  | 2  | 2  | 2   |
| 1  | 1  | 1  | 1   |
| 1  | 5  | 1  | 1   |
| 1  | 2  | 5  | 1   |
| 3  | 2  | 3  | 3   |
| 73 | 73 | 95 | 113 |
| 49 | 66 | 40 | 35  |
| 46 | 46 | 52 | 43  |
| 24 | 15 | 11 | 9   |
| 11 | 3  | 5  | 3   |



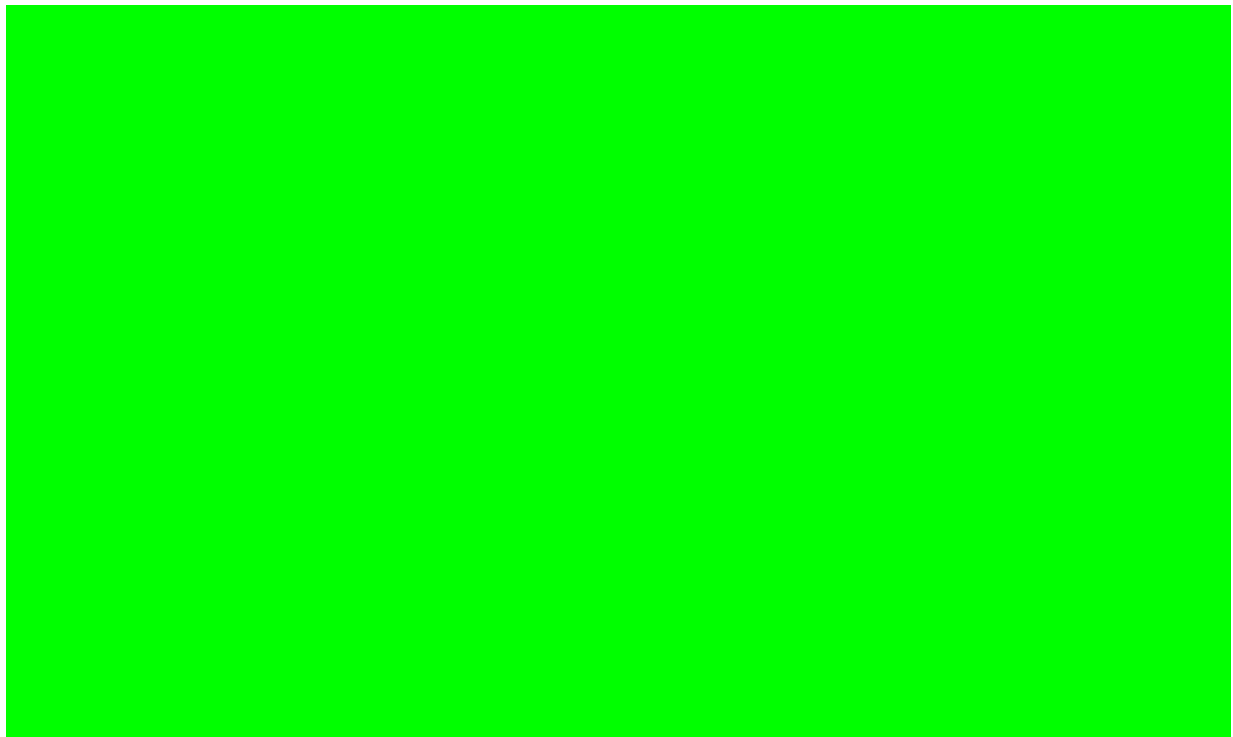

If you do not report sufficiently on Climate Change, how do you think the communication of Climate Change should be improved?

1 introduced with real situations in the daily weather forecasts

1 Climate Change is always with us. We need to explain it better

1

5 If the TV and Radio will give us more time to talk about it

3 virtual e interactivo, videos.

4 to make it a matter of emergency, increased communication

3 Having climatologists readily available to discuss it...

4 If it were more direct involving people's daily lives

4 That's the million-dollar question! I think climate communication is the key

2 Educate people using facts.

1

3

1 Maybe seasonal report to put the weather of the last year in context

1 If the young are fought in schools at an early age and then it's repeated

1

3 I don't know

2

2

2

1

1 For Ireland it is difficult as we have such natural variability

2 Wouldn't know, not my expertise.

1

3

1 Starting from the class room lower primary.

1

2 Related with daily life

1

2 Científicos Meteorólogos en las decisiones de gobierno

3 I am a meteorologist, not a climate change specialist

1

4 By talking about it directly and through education.

1

1

3

1

1 The use of mass media

3 Simple visual examples in colloquial language.

4

4 It should be included in mainstream social media

2

2

3 Having it be more widespread

1

1 Be more close to the public day to day experience. E

1 More agenda.

3

3 Serious involvement of Government and stakeholders  
1 Dedicated Broadcast Climatologist for TV & Radio.  
3 manifest the threat to us or our generation. climate  
3 Demostrando qué sucederá con el ecosistema si el  
3  
1 have special staff with this focus  
2 To have a separate program rather than in the weath  
2 The use of graphics and data that show specifically t  
3  
1 If you could link to what the viewers could do themse  
1 Rendre le sujet plus populaire et accessible au gran p  
1 Rendre le sujet plus populaire et accessible au gran p  
1 using all available chanel  
1 charming people with very simple, exciting short not  
2  
1 To express the impacts with national examples and  
1 If it were less political  
1  
1 by more in depth discussion on how climate change  
5 It would be more effective if introduções com early ch  
4 O momento atual é de severa polaridade não só no  
1 Through close examples, something that is easy for  
1 Delivering in a more positive light. How can we help  
3  
1  
1 Make it less abstract with real tangible examples. Be  
2 Herhalen  
2 Not try to shout out or rub it in, but show with examp  
3 Reasonable  
3 Reasonable  
1 with reports of impacts of climate changes over the  
1 Good graphics would enhance good communication  
3  
4 Solution based reporting -- the viewer knows things  
1 Additional facts and reports to reference in commun  
3  
1 More time to talk about it  
3 May be improving Social Networks  
3 Focus on solutions  
2 If it's more regular and the public are educated first  
1 Telling a human story by the use of the most effectiv  
4 Allowing a set place and time for people to get the in  
3 Communication specialized in Climate Change must  
1 Yes, we must strengthen public education at all leve  
1 First of all, We should manage people's expectation  
1 Only with dates and scientific studies  
1 Good stories. Science based. With nice graphics  
2 less lecturing by "experts" and more listening to aver



2 the communication of Climate Change would be mo  
4 Make it interesting and engaging and make the featu  
3 If we focus on people' stories and in events that hap

3

2

1 Include it as part of the normal narrative

2

4 If all the professionals inform the audience more ofte

1 I think that most, if not all avenues of communication

2

2 Teaching better communication techniques to climat

2 a special segment

4

2 Mitigation

3 If I know, I would do it :-)

1

2 Use of more graphics and comparison with the past

1 More science, more transparency, stronger influence

1 I find accreditation forecasting very effective at getting

2 mientras mas sencillos sean los mensajes, llegaran

1 Creating Awareness campaign

3 by storytelling, images of change, explanation of eve

1 Through governmental participation and involvement

1 Through public awareness

3 presenters given enough time and more segments to

2 I think there are too many news about it and people

3 Should be supported by management and politicians

2 easy to understand graphics, with only little need for

3 We must make co-production.

2 Talk about many familiar topics such as changes in

3 By making use of visuals (videos, testimonies, etc)

1 If i could know my audience. Because it is rather diffi

1

1 If more media would cover it more often.

1 Explaining consequences of a warmer world on a loc

2 Being more positive and no doomsday

1 By focusing on specific impacts that are important to

5 With more resources and time to expose it in the me

1

2 If it was not a politicized subject

2 you have always to tell the truth, even if some get up

1

1 You have to show solutions too, the better way forward

1 More tv time

1 to put it in the context of the daily weather

3 By showing direct examples of how climate change i

1 It would be more effective to have more support to g

1

2 We need to make sure people know how climate change is happening.  
 2 Stick to the science and solutions! It is not a political debate.  
 2 Have more organizations providing ready made material.  
 1 Simplified for audiences understanding  
 1 propose solutions, not just problems  
 1 The challenge might be, how to explain the alarming news.  
 1 If Twitter didn't exist.  
 5 By talking more about solutions  
 3 Relate it to recent extreme events  
 1 More visual graphics  
 2 It should be focused with specific arguments to the science.  
 1 Speaking about local impacts  
 3 between forecasters around world  
 2 If it connects with the audience, with what they are already aware of.  
 4 Greater coverage in all media. Less debate.  
 1  
 1  
 3 Show (even small) solutions and good examples. Give them hope.  
 2 It should have more time and weight in the news  
 1 Implicando a la audiencia. Que sientan que pueden hacer algo.  
 1  
 1 Clear and verified information. Without moral judgement.  
 3 Make it easier to understand for people. Break down the science.  
 1  
 3 By using comparisons of the facts that audience gets from the news.  
 1 Communicating close examples and daily facts  
 4  
 3 Talking about solutions, new technologies and encouraging people to act.  
 2 We have to provide all information in a simple & easy way.  
 2 With visual reports & facts  
 1 various messages/narratives for various audiences, depending on the audience.  
 2  
 1 Simply but scientific  
 3 with examples from life  
 1  
 1 I try to do it when there is something new or some of the facts are new.  
 3 Yes. We should change the "burden of proof". I mean, we should prove that it's not happening.  
 3 Yes. We should change the "burden of proof". I mean, we should prove that it's not happening.  
 1 Increase the involvement of climate scientists, increase the number of scientists.  
 1 CON MÁS TIEMPO EN LOS PROGRAMAS DE TV  
 2 If we use simple language. We must know how to translate the science.  
 2 If it was made simpler from scientific reports  
 1  
 2 before and after images work best to show climate change.  
 5 las políticas gubernamentales no dan prioridad a esta información.  
 1 There should be more present in the tv programme!  
 1 Be real and show/explain the facts.  
 2 By using the current events to explain climate change.

2 Easy to understand/ creative / or simplebut effective

1

1 short video stories: Show Me Change in my life and

3 Use simple language, understandable to all audienc

2

1

1 More easy to understand

1 Specific and local information instead of general

1 Con información sobre como afecta a mi país. Toda

2 Trying to make information more attractive in the cas

1 by choosing the right methods and technics that can

2

94

48

42

14

5

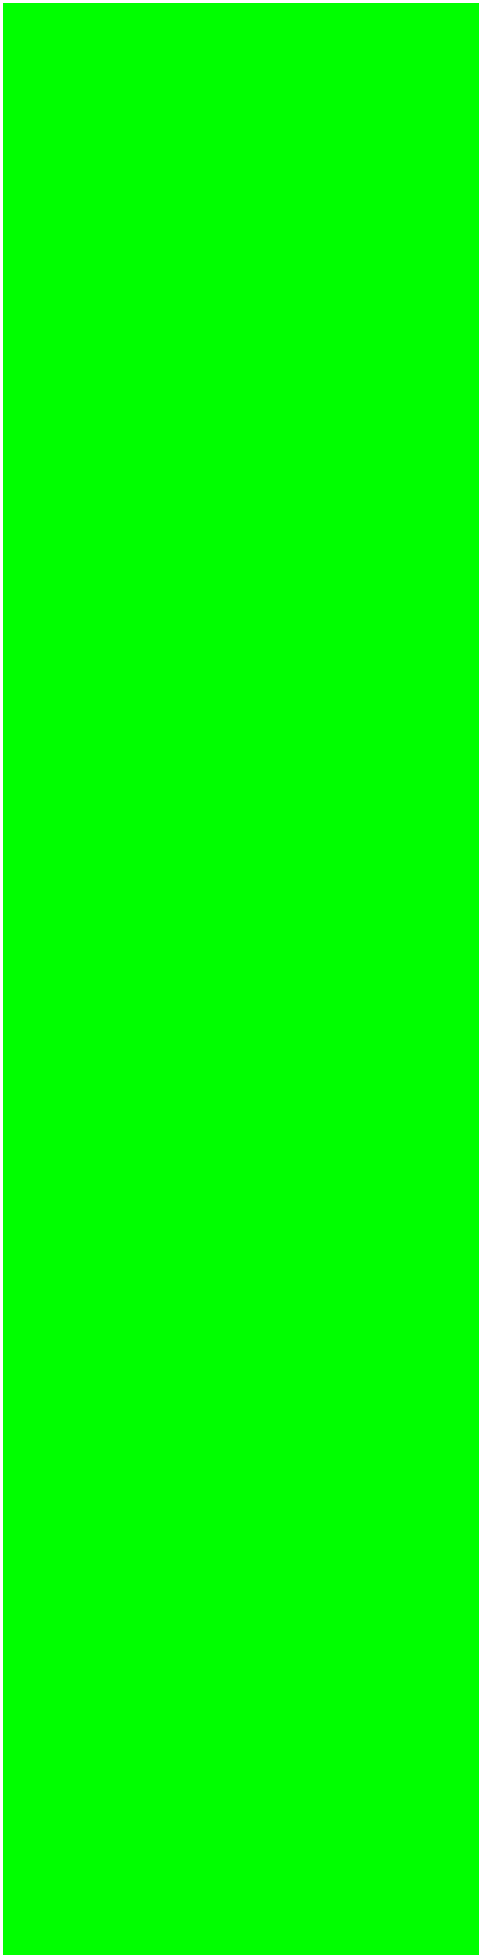

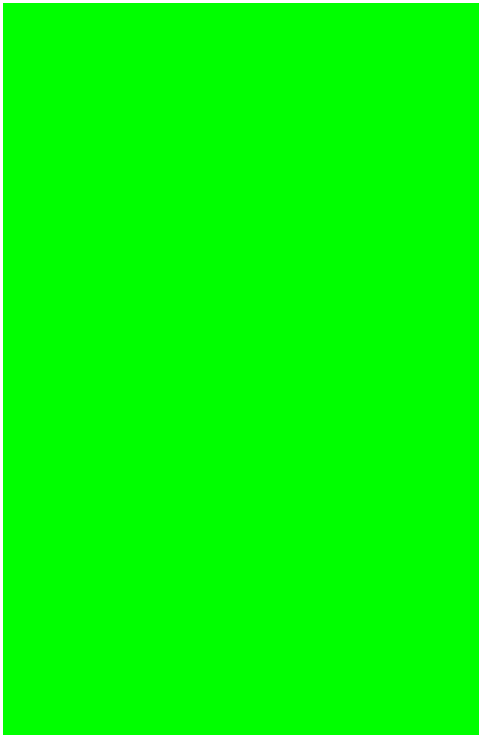

| Under what conditions    | Where do you express | Where do you express | Where do you express |
|--------------------------|----------------------|----------------------|----------------------|
| When an extreme weat     | 1 (Never)            | 4 1 (Never)          |                      |
| When a study appears     | 1 (Never)            | 1 (Never)            |                      |
| Always                   | 3                    | 3                    | 4                    |
| When an extreme weat     | 2 5 (Always)         |                      | 4                    |
| When an extreme weat     | 1 (Never)            | 4                    | 3                    |
| When a study appears     | 1 (Never)            | 3 1 (Never)          |                      |
| Always                   | 1 (Never)            | 1 (Never)            |                      |
| When a study appears     | 2 5 (Always)         | 5 (Always)           |                      |
| When an extreme weat     | 1 (Never)            | 2 1 (Never)          |                      |
| When an extreme weat     | 2                    | 2                    | 2                    |
| When an extreme weat     | 1 (Never)            |                      | 2                    |
| When a study appears     | 1 (Never)            | 1 (Never)            |                      |
| i haven't discussed this | 3                    | 4                    | 4                    |
| Always                   | 3                    | 3                    | 3                    |
| When an extreme weat     | 2                    | 2                    | 2                    |
| When an extreme weat     | 3                    | 3                    | 3                    |
| When an extreme weat     | 1 (Never)            | 4 1 (Never)          |                      |
| When an extreme weat     | 2                    | 2                    | 3                    |
| When an extreme weat     | 2                    | 2                    | 3                    |
| Always                   | 3                    | 3                    | 4                    |
| When an extreme weat     | 3 1 (Never)          |                      | 3                    |
| When a study appears     | 2 1 (Never)          |                      | 2                    |
| When an extreme weat     | 1 (Never)            | 5 (Always)           | 1 (Never)            |
| When an extreme weat     | 4                    | 3 1 (Never)          |                      |
| When an extreme weat     | 3                    | 2                    | 2                    |
| When an extreme weat     | 3                    | 3                    | 4                    |
| When a study appears     | 1 (Never)            | 4 1 (Never)          |                      |
| When an extreme weat     | 4                    | 2                    | 4                    |
| When an extreme weat     | 2                    | 3                    | 4                    |
| When an extreme weat     | 1 (Never)            | 3                    | 3                    |
| Always                   | 4 5 (Always)         | 5 (Always)           |                      |
| When an extreme weat     | 2 5 (Always)         |                      | 3                    |
| When a study appears     | 1 (Never)            | 1 (Never)            |                      |
| They do not have a say   | 4                    | 4                    | 3                    |
| When an extreme weat     | 5 (Always)           | 5 (Always)           | 4                    |
| When an extreme weat     | 4                    | 4                    | 4                    |
| When a study appears     | 1 (Never)            | 3                    | 3                    |
| When a study appears     | 2 5 (Always)         | 1 (Never)            |                      |
| When an extreme weat     | 2                    | 2                    | 2                    |
| When an extreme weat     | 3                    | 3                    | 3                    |
| When an extreme weat     | 3                    | 3                    | 2                    |
| When an extreme weat     | 2 5 (Always)         |                      | 2                    |
| When a study appears     | 3                    | 4                    | 2                    |
| When an extreme weat     | 4                    | 4                    | 4                    |
| When a study appears     | 1 (Never)            | 3                    | 3                    |
| When an extreme weat     | 4                    | 4                    | 4                    |
| When a study appears     | 3                    | 4                    | 3                    |

|                                    |              |              |   |
|------------------------------------|--------------|--------------|---|
| When an extreme weat               | 2            | 3            | 3 |
| When an extreme weat               | 2 1 (Never)  |              | 3 |
| When a study appears               | 2            | 2            | 2 |
| When an extreme weat               | 4            | 4            | 3 |
| When an extreme weat               | 3            | 3 1 (Never)  |   |
| When an extreme weat 5 (Always)    |              | 4 5 (Always) |   |
| Only when there are int            | 3 5 (Always) |              | 4 |
| When an extreme weat               | 3            | 4            | 4 |
| When a study appears 1 (Never)     |              | 3            | 4 |
| When an extreme weat               | 3            | 3            | 4 |
| When an extreme weat 1 (Never)     | 1 (Never)    | 1 (Never)    |   |
| When an extreme weat 1 (Never)     | 1 (Never)    | 1 (Never)    |   |
| Always                             | 2            | 3 1 (Never)  |   |
| When an extreme weat 5 (Always)    | 5 (Always)   | 5 (Always)   |   |
| Always                             | 3            | 4            | 4 |
| When an extreme weat               | 3            | 2            | 2 |
| When an extreme weat 1 (Never)     |              | 3            | 3 |
| Always 5 (Always)                  | 5 (Always)   | 5 (Always)   |   |
| When an extreme weat 1 (Never)     | 5 (Always)   |              | 2 |
| Always                             | 4            | 4            | 4 |
| When an extreme weat               | 4            | 4            | 4 |
| When an extreme weat 5 (Always)    | 5 (Always)   | 5 (Always)   |   |
| Always 5 (Always)                  | 5 (Always)   | 5 (Always)   |   |
| Only when there are int            | 2            | 3            | 3 |
| When an extreme weat               | 2            | 2            | 4 |
| Always                             | 4            | 4            | 4 |
| When an extreme weat               | 4            | 4            | 4 |
| When a study appears               | 4            | 4            | 4 |
| When an extreme weat 5 (Always)    | 5 (Always)   | 5 (Always)   |   |
| When an extreme weat 5 (Always)    | 5 (Always)   | 5 (Always)   |   |
| Always 5 (Always)                  |              | 2 1 (Never)  |   |
| Always                             | 4            | 4            | 2 |
| When a study appears               | 4            | 4            | 3 |
| Always                             | 4            | 4 1 (Never)  |   |
| When a study appears               | 3            | 4 1 (Never)  |   |
| Always 1 (Never)                   | 1 (Never)    | 1 (Never)    |   |
| When an extreme weat               | 2            | 4            | 4 |
| Always 5 (Always)                  |              | 4            | 4 |
| When an extreme weat               | 2            | 2            | 2 |
| When an extreme weat               | 4            | 4            | 4 |
| When an extreme weat 5 (Always)    |              | 4            | 4 |
| Whenever I tell them th            | 3            | 3            | 3 |
| For six years I directed 1 (Never) |              | 4 1 (Never)  |   |
| When an extreme weat               | 4            | 4            | 4 |
| When an extreme weat 1 (Never)     | 5 (Always)   |              | 3 |
| When a study appears               | 4            | 3            | 3 |
| When an extreme weat               | 3 5 (Always) |              | 4 |
| Always                             | 3            | 4            | 4 |

|                                       |              |              |   |
|---------------------------------------|--------------|--------------|---|
| When an extreme weat                  | 3            | 3 1 (Never)  |   |
| When a study appears                  | 2            | 2            | 2 |
| When a study appears                  | 4            | 4            | 4 |
| When an extreme weat                  | 4 1 (Never)  |              | 2 |
| Always 1 (Never)                      |              | 3 1 (Never)  |   |
| Always 5 (Always)                     |              | 2            | 3 |
| When an extreme weat                  | 3            | 2            | 2 |
| When an extreme weat                  | 4            | 4            | 3 |
| When an extreme weat 1 (Never)        |              | 4 1 (Never)  |   |
| When an extreme weat                  | 4            | 4            | 4 |
| When an extreme weat                  | 3 5 (Always) |              | 3 |
| When an extreme weat 1 (Never)        | 1 (Never)    | 1 (Never)    |   |
| Always                                | 4            | 4            | 4 |
| Always                                | 4            | 4            | 4 |
| When an extreme weat                  | 3            | 4            | 3 |
| Always                                | 4 5 (Always) |              | 3 |
| Always 1 (Never)                      |              | 3 5 (Always) |   |
| When an extreme weat                  | 4            | 4            | 4 |
| When an extreme weat                  | 4            | 4            | 3 |
| When an extreme weat 1 (Never)        | 5 (Always)   | 1 (Never)    |   |
| When an extreme weat                  | 4            | 4            | 4 |
| When a study appears 5 (Always)       | 1 (Never)    | 1 (Never)    |   |
| When an extreme weat 5 (Always)       |              | 4 1 (Never)  |   |
| When an extreme weat                  | 4 1 (Never)  | 1 (Never)    |   |
| When an extreme weat                  | 3            | 2            | 3 |
| Always if it is interesting 1 (Never) | 1 (Never)    | 1 (Never)    |   |
| When an extreme weat 5 (Always)       |              | 4 1 (Never)  |   |
| the last three options in             | 2            | 4            | 2 |
| When an extreme weat                  | 2            | 4            | 2 |
| When a study appears 5 (Always)       |              | 2            | 2 |
| When an extreme weat 1 (Never)        | 5 (Always)   | 5 (Always)   |   |
| When an extreme weat 1 (Never)        | 5 (Always)   |              | 3 |
| Always                                | 2 5 (Always) | 1 (Never)    |   |
| Always 5 (Always)                     | 5 (Always)   | 5 (Always)   |   |
| Always 1 (Never)                      |              | 3 1 (Never)  |   |
| Always 1 (Never)                      |              | 4            | 4 |
| Always 5 (Always)                     | 5 (Always)   | 5 (Always)   |   |
| When an extreme weat                  | 3 5 (Always) | 5 (Always)   |   |
| When an extreme weat                  | 4            | 2 1 (Never)  |   |
| When an extreme weat                  | 4            | 4 1 (Never)  |   |
| When an extreme weat                  | 4 5 (Always) |              | 4 |
| Always 5 (Always)                     | 5 (Always)   | 5 (Always)   |   |
| When there are good v                 | 4 5 (Always) | 5 (Always)   |   |
| When a study appears 5 (Always)       |              | 4 5 (Always) |   |
| When an extreme weat                  | 3 5 (Always) | 5 (Always)   |   |
| When an extreme weat 1 (Never)        | 1 (Never)    | 1 (Never)    |   |
| When a study appears 1 (Never)        |              | 4 1 (Never)  |   |
| Always 1 (Never)                      |              | 4            | 3 |



|                        |            |            |            |           |
|------------------------|------------|------------|------------|-----------|
| I operate autonomously | 2          | 2          | 1 (Never)  |           |
| Always                 | 4          | 5 (Always) |            | 3         |
| Always                 | 1 (Never)  | 5 (Always) |            | 2         |
| When an extreme weat   | 4          |            | 4          | 3         |
| Never                  | 5 (Always) | 5 (Always) | 5 (Always) |           |
| When an extreme weat   | 5 (Always) | 5 (Always) | 5 (Always) |           |
| Always                 | 1 (Never)  | 1 (Never)  | 1 (Never)  |           |
| Always                 | 1 (Never)  |            | 3          | 1 (Never) |
| When a study appears   | 2          |            | 3          | 3         |
| Always                 | 5 (Always) | 5 (Always) | 1 (Never)  |           |
| When an extreme weat   | 3          | 5 (Always) | 5 (Always) |           |
| When an extreme weat   | 5 (Always) | 5 (Always) | 5 (Always) |           |
| When an extreme weat   | 3          |            | 4          | 3         |
| When a study appears   | 1 (Never)  |            | 4          | 3         |
| Always                 | 1 (Never)  | 5 (Always) | 1 (Never)  |           |
| Always                 | 5 (Always) | 5 (Always) | 5 (Always) |           |
| When an extreme weat   | 1 (Never)  | 5 (Always) |            | 3         |
| When an extreme weat   | 3          |            | 3          | 3         |
| When a study appears   | 2          | 5 (Always) |            | 2         |
| Always                 | 1 (Never)  |            | 4          | 1 (Never) |
| When an extreme weat   | 4          |            | 3          | 3         |
| When an extreme weat   | 4          |            | 4          | 4         |
| Always                 | 1 (Never)  | 5 (Always) | 1 (Never)  |           |
| Always                 | 4          |            | 4          | 4         |
| When an extreme weat   | 4          |            | 2          | 4         |
| Always                 | 5 (Always) | 5 (Always) | 5 (Always) |           |
| Always                 | 1 (Never)  | 5 (Always) | 5 (Always) |           |
| When an extreme weat   | 4          |            | 2          | 2         |
| Always                 | 4          | 5 (Always) |            | 4         |
| Always                 | 5 (Always) | 5 (Always) |            | 4         |
| Always                 | 5 (Always) | 5 (Always) |            | 4         |
| When an extreme weat   | 2          | 5 (Always) | 1 (Never)  |           |
| Always                 | 5 (Always) | 5 (Always) | 5 (Always) |           |
| Always                 | 5 (Always) | 5 (Always) | 5 (Always) |           |
| Always                 | 5 (Always) |            | 2          | 4         |
| When an extreme weat   | 5 (Always) | 5 (Always) |            | 4         |
| When an extreme weat   | 4          |            | 4          | 4         |
| When an extreme weat   | 4          |            | 4          | 4         |
| When a study appears   | 3          | 5 (Always) |            | 3         |
| When an extreme weat   | 4          | 5 (Always) | 5 (Always) |           |
| When an extreme weat   | 5 (Always) |            | 3          | 1 (Never) |
| When an extreme weat   | 4          | 5 (Always) |            | 4         |
| When an extreme weat   | 4          | 5 (Always) |            | 3         |
| Both answer 3 and 4    | 4          |            | 3          | 3         |
| Always                 | 4          |            | 4          | 2         |
| Always                 | 5 (Always) | 5 (Always) | 5 (Always) |           |
| Always                 | 5 (Always) | 5 (Always) | 5 (Always) |           |
| Always                 | 5 (Always) | 5 (Always) |            | 4         |

|                         |            |    |            |            |           |
|-------------------------|------------|----|------------|------------|-----------|
| Always                  |            | 4  | 5 (Always) | 5 (Always) |           |
| Always                  | 5 (Always) |    | 5 (Always) | 5 (Always) |           |
| for TV when there is VI | 5 (Always) |    | 5 (Always) |            | 4         |
| Never                   | 5 (Always) |    | 5 (Always) |            | 3         |
| Always                  |            | 2  | 5 (Always) |            | 2         |
| Always                  |            | 4  |            | 4          | 2         |
| When an extreme weat    | 5 (Always) |    | 5 (Always) | 5 (Always) |           |
| When an extreme weat    | 5 (Always) |    | 5 (Always) | 5 (Always) |           |
| When a study appears    | 5 (Always) |    | 5 (Always) | 5 (Always) |           |
| Always                  |            | 4  |            | 4          | 1 (Never) |
| When an extreme weat    | 5 (Always) |    |            | 4          | 3         |
| Always                  |            | 2  |            | 4          | 4         |
|                         | 58         | 45 |            | 18         | 47        |
|                         | 2          | 30 |            | 23         | 26        |
|                         | 101        | 33 |            | 32         | 44        |
|                         | 29         | 52 |            | 63         | 51        |
|                         | 2          | 43 |            | 67         | 35        |

ALTRES 11





| Where do you express | Where do you express | The amount of informal | The information that the |
|----------------------|----------------------|------------------------|--------------------------|
|                      | 4 1 (Never)          |                        | 3                        |
|                      | 2 1 (Never)          |                        | 2                        |
|                      | 4                    | 3                      | 4                        |
|                      | 2 5 (Always)         |                        | 2                        |
| 1 (Never)            |                      | 2                      | 3                        |
| 1 (Never)            | 1 (Never)            |                        | 2                        |
|                      | 2 1 (Never)          |                        | 3                        |
|                      | 2 1 (Never)          |                        | 4                        |
|                      | 3                    | 3                      | 3                        |
|                      | 2                    | 2                      | 3                        |
| 1 (Never)            | 1 (Never)            |                        | 2                        |
| 1 (Never)            | 1 (Never)            |                        | 3                        |
|                      | 4 1 (Never)          |                        | 2                        |
|                      | 3                    | 2                      | 4                        |
|                      | 4                    | 4                      | 2                        |
|                      | 4                    | 4                      | 2                        |
|                      | 3 1 (Never)          |                        | 3                        |
|                      | 3 1 (Never)          |                        | 2                        |
|                      | 3 1 (Never)          |                        | 2                        |
|                      | 3                    | 2                      | 4                        |
| 5 (Always)           | 5 (Always)           |                        | 3                        |
|                      | 3 1 (Never)          |                        | 4                        |
|                      | 3 1 (Never)          |                        | 5                        |
|                      | 4                    | 3                      | 3                        |
|                      | 2                    | 3                      | 3                        |
|                      | 4 1 (Never)          |                        | 3                        |
|                      | 3 1 (Never)          |                        | 2                        |
|                      | 4                    | 3                      | 4                        |
|                      | 4                    | 2                      | 2                        |
|                      | 3                    | 4                      | 5                        |
| 5 (Always)           |                      | 4                      | 5                        |
| 5 (Always)           | 1 (Never)            |                        | 3                        |
|                      | 3                    | 3                      | 4                        |
|                      | 3 1 (Never)          |                        | 4                        |
|                      | 4                    | 4                      | 4                        |
| 5 (Always)           |                      | 4                      | 2                        |
| 1 (Never)            | 1 (Never)            |                        | 4                        |
|                      | 4                    | 3                      | 2                        |
|                      | 2                    | 2                      | 2                        |
|                      | 2                    | 2                      | 3                        |
|                      | 4                    | 3                      | 2                        |
|                      | 2                    | 4                      | 4                        |
|                      | 3 1 (Never)          |                        | 4                        |
|                      | 4                    | 4                      | 3                        |
|                      | 3                    | 3                      | 3                        |
|                      | 4                    | 4                      | 2                        |
|                      | 4                    | 3                      | 4                        |

|            |             |   |   |   |
|------------|-------------|---|---|---|
|            | 3           | 2 | 3 | 4 |
|            | 4           | 3 | 2 | 4 |
|            | 2           | 2 | 3 | 4 |
|            | 3           | 3 | 3 | 4 |
| 1 (Never)  | 1 (Never)   |   | 4 | 4 |
| 5 (Always) | 5 (Always)  |   | 1 | 5 |
|            | 4 1 (Never) |   | 3 | 4 |
|            | 4           | 4 | 4 | 4 |
|            | 4           | 3 | 2 | 4 |
|            | 4           | 2 | 1 | 5 |
| 5 (Always) | 1 (Never)   |   | 2 | 3 |
| 5 (Always) | 1 (Never)   |   | 2 | 3 |
|            | 4 1 (Never) |   | 1 | 1 |
| 5 (Always) | 5 (Always)  |   | 4 | 4 |
|            | 4 1 (Never) |   | 1 | 1 |
|            | 3           | 2 | 2 | 3 |
| 1 (Never)  | 1 (Never)   |   | 1 | 2 |
| 5 (Always) |             | 4 | 4 | 3 |
| 5 (Always) | 5 (Always)  |   | 2 | 3 |
|            | 3           | 3 | 3 | 4 |
|            | 4           | 4 | 2 | 3 |
| 5 (Always) | 5 (Always)  |   | 4 | 3 |
| 5 (Always) | 5 (Always)  |   | 1 | 2 |
| 5 (Always) | 5 (Always)  |   | 4 | 4 |
|            | 2           | 4 | 4 | 3 |
| 1 (Never)  |             | 4 | 2 | 4 |
|            | 4           | 4 | 4 | 3 |
|            | 4           | 3 | 2 | 3 |
|            | 3           | 4 | 5 | 5 |
|            | 3           | 4 | 5 | 5 |
|            | 2 1 (Never) |   | 3 | 3 |
|            | 4           | 2 | 4 | 5 |
|            | 4 1 (Never) |   | 3 | 4 |
| 5 (Always) | 1 (Never)   |   | 3 | 3 |
|            | 3 1 (Never) |   | 2 | 3 |
|            | 3           | 3 | 4 | 2 |
| 5 (Always) |             | 4 | 2 | 3 |
| 5 (Always) |             | 2 | 4 | 4 |
|            | 2           | 2 | 3 | 2 |
| 5 (Always) |             | 4 | 2 | 4 |
|            | 3 1 (Never) |   | 4 | 4 |
|            | 4           | 3 | 2 | 5 |
|            | 4 1 (Never) |   | 2 | 2 |
|            | 4           | 3 | 3 | 2 |
| 5 (Always) | 1 (Never)   |   | 3 | 3 |
|            | 4           | 2 | 2 | 2 |
|            | 4           | 4 | 4 | 4 |
| 5 (Always) |             | 4 | 4 | 4 |

|            |              |   |   |   |
|------------|--------------|---|---|---|
|            | 4            | 2 | 2 | 4 |
|            | 4            | 2 | 2 | 4 |
|            | 2            | 2 | 1 | 4 |
|            | 2            | 3 | 2 | 2 |
|            | 3            | 2 | 3 | 3 |
|            | 4            | 3 | 1 | 2 |
|            | 3            | 2 | 2 | 2 |
|            | 4            | 3 | 3 | 3 |
|            | 4            | 4 | 4 | 4 |
|            | 4            | 2 | 3 | 3 |
| 5 (Always) | 5 (Always)   |   | 2 | 2 |
| 1 (Never)  | 1 (Never)    |   | 3 | 3 |
|            | 4            | 2 | 3 | 3 |
|            | 4            | 4 | 3 | 3 |
|            | 3            | 3 | 3 | 2 |
| 5 (Always) |              | 3 | 2 | 4 |
|            | 2 1 (Never)  |   | 2 | 3 |
|            | 4            | 3 | 4 | 4 |
|            | 2            | 3 | 3 | 4 |
| 1 (Never)  |              | 3 | 3 | 2 |
|            | 4            | 4 | 4 | 4 |
| 5 (Always) | 5 (Always)   |   | 2 | 1 |
|            | 4 1 (Never)  |   | 4 | 4 |
|            | 4 1 (Never)  |   | 4 | 5 |
|            | 3            | 4 | 2 | 3 |
|            | 2            | 2 | 3 | 3 |
|            | 4            | 4 | 3 | 3 |
|            | 4 1 (Never)  |   | 3 | 1 |
| 1 (Never)  | 1 (Never)    |   | 4 | 3 |
|            | 4            | 4 | 2 | 4 |
| 5 (Always) | 5 (Always)   |   | 5 | 4 |
| 5 (Always) | 5 (Always)   |   | 4 | 3 |
| 5 (Always) | 1 (Never)    |   | 3 | 3 |
| 5 (Always) | 5 (Always)   |   | 2 | 4 |
|            | 3            | 3 | 2 | 3 |
| 5 (Always) | 5 (Always)   |   | 2 | 2 |
| 5 (Always) | 5 (Always)   |   | 4 | 3 |
| 5 (Always) |              | 4 | 1 | 2 |
|            | 2            | 4 | 4 | 2 |
|            | 4 5 (Always) |   | 2 | 1 |
| 5 (Always) | 5 (Always)   |   | 4 | 3 |
| 5 (Always) | 1 (Never)    |   | 2 | 3 |
|            | 4            | 4 | 4 | 4 |
| 5 (Always) |              | 3 | 3 | 5 |
|            | 4            | 3 | 2 | 5 |
|            | 4 1 (Never)  |   | 2 | 3 |
|            | 4            | 2 | 1 | 2 |
| 5 (Always) | 5 (Always)   |   | 2 | 4 |

|            |             |   |   |   |
|------------|-------------|---|---|---|
|            | 3 1 (Never) |   | 2 | 3 |
| 5 (Always) |             | 3 | 3 | 3 |
| 5 (Always) | 1 (Never)   |   | 2 | 2 |
|            | 4 1 (Never) |   | 1 | 2 |
| 5 (Always) | 5 (Always)  |   | 2 | 4 |
| 5 (Always) | 5 (Always)  |   | 1 | 2 |
|            | 3           | 2 | 1 | 1 |
| 5 (Always) | 5 (Always)  |   | 3 | 2 |
|            | 3           | 2 | 4 | 4 |
| 5 (Always) | 5 (Always)  |   | 5 | 3 |
| 5 (Always) | 5 (Always)  |   | 3 | 2 |
| 5 (Always) |             | 4 | 4 | 2 |
| 5 (Always) |             | 4 | 4 | 3 |
| 5 (Always) |             | 2 | 2 | 3 |
| 5 (Always) |             | 3 | 1 | 1 |
| 5 (Always) |             | 2 | 3 | 2 |
| 5 (Always) | 5 (Always)  |   | 2 | 2 |
|            | 3           | 3 | 2 | 2 |
| 5 (Always) | 5 (Always)  |   | 2 | 4 |
|            | 3           | 3 | 2 | 2 |
|            | 3           | 3 | 4 | 3 |
|            | 4           | 4 | 2 | 4 |
| 5 (Always) |             | 2 | 4 | 4 |
| 1 (Never)  |             | 4 | 4 | 4 |
|            | 4           | 4 | 5 | 4 |
| 5 (Always) | 5 (Always)  |   | 3 | 3 |
|            | 3           | 3 | 4 | 4 |
|            | 4           | 2 | 2 | 4 |
|            | 4           | 4 | 4 | 3 |
| 5 (Always) |             | 4 | 4 | 4 |
| 5 (Always) | 5 (Always)  |   | 2 | 2 |
|            | 4 1 (Never) |   | 1 | 2 |
| 5 (Always) | 5 (Always)  |   | 1 | 2 |
| 5 (Always) | 5 (Always)  |   | 4 | 4 |
|            | 4           | 4 | 4 | 4 |
| 5 (Always) | 5 (Always)  |   | 3 | 3 |
| 5 (Always) | 5 (Always)  |   | 1 | 2 |
| 5 (Always) | 5 (Always)  |   | 1 | 2 |
| 5 (Always) |             | 3 | 1 | 2 |
| 5 (Always) |             | 4 | 1 | 2 |
| 5 (Always) | 5 (Always)  |   | 2 | 2 |
| 5 (Always) | 5 (Always)  |   | 4 | 4 |
| 5 (Always) |             | 3 | 2 | 2 |
|            | 3 1 (Never) |   | 3 | 3 |
| 5 (Always) | 5 (Always)  |   | 4 | 4 |
| 1 (Never)  | 5 (Always)  |   | 2 | 2 |
| 5 (Always) | 1 (Never)   |   | 5 | 5 |
| 5 (Always) | 5 (Always)  |   | 5 | 4 |



|            |            |    |    |    |
|------------|------------|----|----|----|
| 5 (Always) | 5 (Always) |    | 5  | 4  |
| 5 (Always) | 5 (Always) |    | 1  | 2  |
| 5 (Always) | 5 (Always) |    | 2  | 1  |
|            | 2          | 3  | 4  | 4  |
|            | 4          | 4  | 3  | 4  |
| 5 (Always) | 5 (Always) |    | 3  | 2  |
| 5 (Always) | 5 (Always) |    | 4  | 4  |
| 5 (Always) | 5 (Always) |    | 3  | 2  |
| 5 (Always) | 5 (Always) |    | 4  | 2  |
|            | 4          | 4  | 1  | 3  |
|            | 3          | 3  | 4  | 4  |
|            | 4          | 2  | 1  | 4  |
|            | 13         | 48 | 23 | 8  |
|            | 20         | 31 | 60 | 57 |
|            | 37         | 39 | 51 | 59 |
|            | 62         | 41 | 54 | 66 |
|            | 71         | 44 | 15 | 13 |





| What is the main difficulty in communication? | What is the main difficulty in communication? | What is the main difficulty in communication? |
|-----------------------------------------------|-----------------------------------------------|-----------------------------------------------|
| 4                                             | 3                                             | 2                                             |
| 3                                             | 2                                             | 3                                             |
| 3                                             | 3                                             | 4                                             |
| 4                                             | 3                                             | 4                                             |
| 4                                             | 4                                             | 4                                             |
| 3                                             | 4                                             | 4                                             |
| 2                                             | 2                                             | 2                                             |
| 4                                             | 3                                             | 2                                             |
| 4                                             | 4                                             | 3                                             |
| 3                                             | 3                                             | 2                                             |
| 3                                             | 3                                             | 3                                             |
| 4                                             | 4                                             | 3                                             |
| 5                                             | 4                                             | 4                                             |
| 2                                             | 2                                             | 1                                             |
| 2                                             | 3                                             | 4                                             |
| 2                                             | 3                                             | 3                                             |
| 2                                             | 4                                             | 3                                             |
| 3                                             | 3                                             | 2                                             |
| 3                                             | 3                                             | 2                                             |
| 3                                             | 2                                             | 2                                             |
| 4                                             | 5                                             | 3                                             |
| 4                                             | 4                                             | 3                                             |
| 5                                             | 5                                             | 5                                             |
| 2                                             | 4                                             | 3                                             |
| 5                                             | 5                                             | 5                                             |
| 5                                             | 4                                             | 3                                             |
| 3                                             | 1                                             | 1                                             |
| 3                                             | 1                                             | 1                                             |
| 4                                             | 4                                             | 4                                             |
| 3                                             | 2                                             | 1                                             |
| 4                                             | 3                                             | 3                                             |
| 5                                             | 5                                             | 5                                             |
| 3                                             | 3                                             | 3                                             |
| 1                                             | 4                                             | 4                                             |
| 4                                             | 4                                             | 4                                             |
| 3                                             | 4                                             | 2                                             |
| 2                                             | 2                                             | 3                                             |
| 4                                             | 4                                             | 3                                             |
| 3                                             | 3                                             | 2                                             |
| 4                                             | 3                                             | 4                                             |
| 4                                             | 4                                             | 3                                             |
| 3                                             | 3                                             | 3                                             |
| 4                                             | 5                                             | 4                                             |
| 4                                             | 4                                             | 4                                             |
| 3                                             | 2                                             | 2                                             |
| 3                                             | 2                                             | 2                                             |
| 5                                             | 5                                             | 5                                             |

3  
3  
4  
3  
4  
1  
3  
4  
4  
1  
4  
4  
3  
5  
3  
2  
2  
3  
1  
4  
4  
2  
3  
3  
4  
2  
3  
3  
5  
5  
4  
4  
3  
4  
3  
3  
4  
4  
2  
2  
4  
4  
4  
5  
4  
3  
3  
3

2  
2  
3  
3  
4  
5  
3  
4  
4  
2  
3  
3  
5  
2  
5  
4  
1  
3  
3  
3  
5  
3  
2  
4  
3  
3  
5  
4  
3  
3  
2  
2  
3  
2  
1  
3  
2  
4  
5  
3  
3  
2  
4

3  
4  
3  
3  
4  
1  
4  
3  
4  
1  
3  
3  
2  
1  
5  
2  
1  
2  
3  
4  
3  
1  
3  
4  
2  
3  
5  
4  
1  
3  
2  
2  
2  
2  
4  
2  
5  
3  
4  
3  
3  
3  
4

|   |   |   |
|---|---|---|
| 4 | 4 | 2 |
| 4 | 3 | 3 |
| 2 | 2 | 2 |
| 4 | 4 | 3 |
| 3 | 3 | 2 |
| 5 | 5 | 4 |
| 4 | 3 | 2 |
| 3 | 3 | 3 |
| 4 | 3 | 3 |
| 3 | 3 | 1 |
| 4 | 4 | 2 |
| 3 | 3 | 3 |
| 3 | 4 | 3 |
| 2 | 4 | 4 |
| 3 | 4 | 4 |
| 2 | 2 | 1 |
| 5 | 4 | 4 |
| 2 | 5 | 4 |
| 3 | 2 | 2 |
| 5 | 5 | 4 |
| 5 | 3 | 2 |
| 5 | 5 | 5 |
| 3 | 3 | 3 |
| 5 | 4 | 4 |
| 4 | 5 | 3 |
| 3 | 3 | 3 |
| 2 | 1 | 3 |
| 3 | 3 | 4 |
| 3 | 4 | 1 |
| 3 | 2 | 1 |
| 5 | 4 | 5 |
| 2 | 5 | 5 |
| 1 | 4 | 1 |
| 4 | 4 | 3 |
| 2 | 2 | 3 |
| 4 | 4 | 4 |
| 4 | 5 | 1 |
| 3 | 5 | 4 |
| 4 | 3 | 3 |
| 4 | 5 | 5 |
| 4 | 2 | 3 |
| 4 | 5 | 3 |
| 2 | 4 | 4 |
| 2 | 2 | 1 |
| 2 | 1 | 2 |
| 4 | 5 | 5 |
| 3 | 4 | 4 |
| 2 | 5 | 3 |

|   |   |   |
|---|---|---|
| 3 | 5 | 4 |
| 2 | 4 | 4 |
| 4 | 4 | 4 |
| 4 | 4 | 5 |
| 4 | 1 | 2 |
| 3 | 3 | 2 |
| 3 | 4 | 1 |
| 4 | 3 | 1 |
| 5 | 5 | 3 |
| 3 | 2 | 3 |
| 4 | 4 | 3 |
| 3 | 2 | 3 |
| 5 | 4 | 4 |
| 1 | 4 | 3 |
| 2 | 5 | 3 |
| 4 | 3 | 1 |
| 4 | 4 | 3 |
| 3 | 5 | 2 |
| 2 | 4 | 2 |
| 5 | 4 | 4 |
| 4 | 4 | 4 |
| 3 | 2 | 2 |
| 4 | 1 | 1 |
| 3 | 5 | 1 |
| 5 | 5 | 4 |
| 3 | 4 | 1 |
| 5 | 4 | 2 |
| 2 | 2 | 4 |
| 1 | 4 | 2 |
| 4 | 4 | 3 |
| 3 | 3 | 3 |
| 5 | 5 | 5 |
| 4 | 1 | 1 |
| 4 | 4 | 4 |
| 3 | 2 | 1 |
| 4 | 2 | 2 |
| 2 | 4 | 4 |
| 2 | 4 | 4 |
| 3 | 5 | 4 |
| 3 | 1 | 1 |
| 4 | 4 | 4 |
| 5 | 4 | 4 |
| 3 | 2 | 3 |
| 4 | 5 | 4 |
| 5 | 4 | 4 |
| 4 | 4 | 4 |
| 4 | 4 | 4 |
| 2 | 3 | 2 |

|    |    |    |
|----|----|----|
| 4  | 5  | 3  |
| 2  | 2  | 3  |
| 4  | 5  | 5  |
| 3  | 3  | 4  |
| 3  | 2  | 1  |
| 4  | 3  | 4  |
| 5  | 2  | 2  |
| 3  | 4  | 3  |
| 4  | 4  | 2  |
| 5  | 2  | 1  |
| 5  | 5  | 5  |
| 3  | 3  | 3  |
| 7  | 10 | 29 |
| 32 | 36 | 41 |
| 66 | 53 | 60 |
| 70 | 65 | 55 |
| 28 | 39 | 18 |





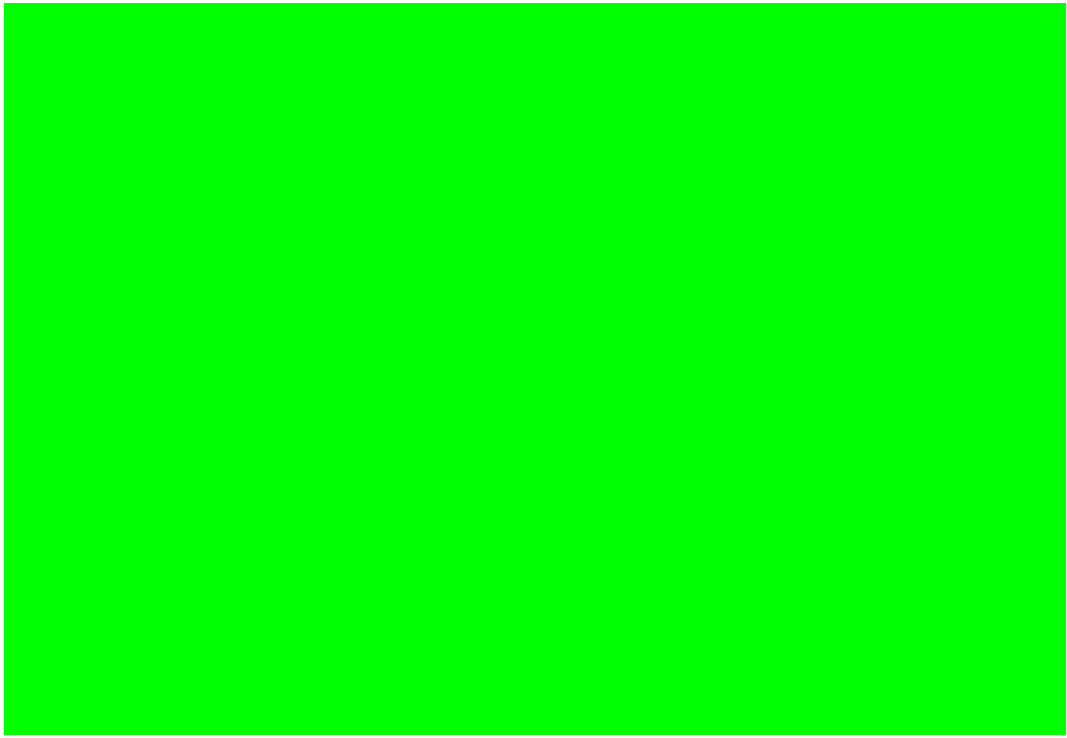

What is the main difficulty? What is the main difficulty? What is the main difficulty? What is the main difficulty in co

|   |   |   |   |
|---|---|---|---|
| 4 | 4 | 4 | 4 |
| 3 | 4 | 5 | 4 |
| 3 | 3 | 2 | 3 |
| 3 | 2 | 3 | 4 |
| 3 | 3 | 3 | 3 |
| 3 | 3 | 3 | 3 |
| 5 | 5 | 2 | 5 |
| 2 | 3 | 4 | 2 |
| 4 | 2 | 4 | 4 |
| 3 | 3 | 2 | 3 |
| 3 | 3 | 4 | 1 |
| 4 | 2 | 2 | 2 |
| 4 | 3 | 3 | 3 |
| 2 | 2 | 1 | 2 |
| 4 | 2 | 2 | 4 |
| 4 | 3 | 2 | 2 |
| 2 | 4 | 2 | 3 |
| 5 | 2 | 2 | 3 |
| 5 | 2 | 2 | 3 |
| 3 | 2 | 3 | 3 |
| 5 | 5 | 5 | 5 |
| 5 | 5 | 3 | 3 |
| 5 | 1 | 1 | 3 |
| 4 | 4 | 4 | 3 |
| 5 | 5 | 5 | 2 |
| 4 | 4 | 4 | 4 |
| 3 | 1 | 1 | 1 |
| 5 | 5 | 4 | 1 |
| 5 | 4 | 5 | 5 |
| 4 | 4 | 4 | 4 |
| 2 | 2 | 2 | 2 |
| 5 | 3 | 4 | 4 |
| 2 | 2 | 2 | 2 |
| 3 | 3 | 3 | 3 |
| 4 | 4 | 4 | 4 |
| 2 | 3 | 4 | 2 |
| 2 | 2 | 2 | 2 |
| 4 | 4 | 4 | 4 |
| 4 | 4 | 2 | 2 |
| 3 | 3 | 3 | 3 |
| 4 | 4 | 5 | 3 |
| 3 | 3 | 3 | 4 |
| 3 | 3 | 2 | 2 |
| 2 | 2 | 4 | 2 |
| 3 | 2 | 2 | 3 |
| 3 | 3 | 1 | 1 |
| 3 | 1 | 1 | 3 |

|   |   |   |   |
|---|---|---|---|
| 3 | 4 | 3 | 3 |
| 4 | 3 | 4 | 3 |
| 4 | 4 | 3 | 4 |
| 3 | 3 | 3 | 3 |
| 4 | 4 | 3 | 4 |
| 4 | 4 | 1 | 4 |
| 4 | 3 | 3 | 4 |
| 4 | 2 | 2 | 3 |
| 4 | 3 | 3 | 3 |
| 4 | 3 | 1 | 1 |
| 5 | 3 | 3 | 3 |
| 5 | 3 | 3 | 3 |
| 5 | 2 | 3 | 2 |
| 5 | 4 | 5 | 5 |
| 4 | 2 | 2 | 3 |
| 2 | 3 | 2 | 2 |
| 4 | 2 | 1 | 2 |
| 2 | 2 | 2 | 3 |
| 4 | 2 | 4 | 3 |
| 3 | 2 | 1 | 1 |
| 4 | 3 | 4 | 3 |
| 2 | 5 | 5 | 1 |
| 4 | 5 | 3 | 4 |
| 4 | 4 | 3 | 3 |
| 4 | 4 | 5 | 4 |
| 3 | 1 | 2 | 3 |
| 3 | 3 | 3 | 3 |
| 3 | 3 | 2 | 2 |
| 5 | 5 | 5 | 5 |
| 5 | 5 | 5 | 5 |
| 4 | 2 | 1 | 3 |
| 3 | 3 | 2 | 2 |
| 3 | 3 | 3 | 3 |
| 4 | 2 | 2 | 3 |
| 3 | 3 | 3 | 4 |
| 4 | 4 | 4 | 4 |
| 3 | 1 | 2 | 3 |
| 4 | 4 | 3 | 2 |
| 4 | 2 | 3 | 3 |
| 4 | 2 | 4 | 3 |
| 4 | 3 | 2 | 4 |
| 4 | 4 | 1 | 1 |
| 5 | 5 | 5 | 4 |
| 3 | 3 | 4 | 2 |
| 4 | 3 | 3 | 4 |
| 4 | 4 | 4 | 3 |
| 4 | 4 | 3 | 3 |
| 2 | 3 | 1 | 3 |

|   |   |   |   |
|---|---|---|---|
| 4 | 2 | 2 | 4 |
| 4 | 4 | 4 | 3 |
| 4 | 4 | 5 | 3 |
| 5 | 4 | 4 | 4 |
| 3 | 4 | 2 | 2 |
| 3 | 2 | 4 | 3 |
| 4 | 3 | 2 | 4 |
| 3 | 3 | 4 | 3 |
| 5 | 5 | 3 | 3 |
| 5 | 4 | 4 | 2 |
| 4 | 5 | 4 | 4 |
| 4 | 4 | 4 | 3 |
| 4 | 2 | 4 | 2 |
| 4 | 4 | 4 | 4 |
| 4 | 4 | 3 | 3 |
| 4 | 5 | 4 | 2 |
| 4 | 5 | 3 | 4 |
| 2 | 3 | 1 | 4 |
| 4 | 3 | 3 | 3 |
| 5 | 4 | 5 | 2 |
| 4 | 3 | 2 | 2 |
| 5 | 4 | 3 | 3 |
| 2 | 2 | 2 | 2 |
| 5 | 5 | 3 | 5 |
| 4 | 4 | 3 | 4 |
| 2 | 4 | 3 | 3 |
| 1 | 1 | 1 | 1 |
| 4 | 3 | 1 | 1 |
| 1 | 1 | 1 | 1 |
| 4 | 3 | 2 | 5 |
| 5 | 5 | 4 | 5 |
| 3 | 4 | 4 | 3 |
| 1 | 1 | 1 | 1 |
| 4 | 3 | 3 | 4 |
| 4 | 4 | 3 | 2 |
| 3 | 3 | 2 | 4 |
| 1 | 1 | 1 | 1 |
| 1 | 3 | 4 | 1 |
| 5 | 4 | 1 | 2 |
| 4 | 3 | 4 | 4 |
| 1 | 4 | 4 | 3 |
| 4 | 4 | 4 | 2 |
| 1 | 2 | 3 | 2 |
| 2 | 2 | 1 | 2 |
| 2 | 2 | 2 | 1 |
| 4 | 4 | 4 | 1 |
| 5 | 2 | 4 | 4 |
| 3 | 5 | 5 | 1 |

|   |   |   |   |
|---|---|---|---|
| 4 | 1 | 4 | 2 |
| 1 | 1 | 1 | 1 |
| 5 | 3 | 3 | 4 |
| 4 | 2 | 2 | 2 |
| 4 | 1 | 1 | 5 |
| 1 | 2 | 2 | 2 |
| 4 | 1 | 2 | 4 |
| 5 | 4 | 4 | 3 |
| 5 | 3 | 4 | 3 |
| 3 | 3 | 3 | 3 |
| 2 | 3 | 4 | 4 |
| 3 | 4 | 4 | 3 |
| 3 | 3 | 3 | 5 |
| 3 | 4 | 4 | 2 |
| 5 | 4 | 3 | 3 |
| 2 | 2 | 2 | 1 |
| 3 | 2 | 2 | 3 |
| 5 | 3 | 3 | 1 |
| 4 | 4 | 3 | 3 |
| 4 | 3 | 5 | 4 |
| 5 | 3 | 3 | 2 |
| 3 | 4 | 4 | 2 |
| 5 | 3 | 1 | 4 |
| 5 | 4 | 1 | 1 |
| 4 | 2 | 3 | 5 |
| 5 | 3 | 5 | 5 |
| 4 | 4 | 3 | 3 |
| 2 | 4 | 4 | 3 |
| 3 | 3 | 3 | 3 |
| 3 | 4 | 3 | 3 |
| 5 | 4 | 4 | 3 |
| 1 | 2 | 1 | 4 |
| 5 | 2 | 1 | 3 |
| 4 | 4 | 3 | 3 |
| 3 | 3 | 2 | 3 |
| 4 | 4 | 2 | 4 |
| 5 | 2 | 2 | 5 |
| 5 | 2 | 2 | 5 |
| 4 | 2 | 3 | 3 |
| 4 | 4 | 3 | 2 |
| 5 | 4 | 3 | 4 |
| 5 | 4 | 3 | 3 |
| 4 | 3 | 2 | 5 |
| 3 | 2 | 3 | 4 |
| 4 | 3 | 3 | 3 |
| 1 | 1 | 1 | 1 |
| 4 | 4 | 4 | 4 |
| 2 | 4 | 3 | 5 |

|    |    |    |    |
|----|----|----|----|
| 4  | 5  | 5  | 4  |
| 3  | 2  | 1  | 5  |
| 5  | 1  | 2  | 3  |
| 4  | 4  | 4  | 4  |
| 4  | 5  | 4  | 1  |
| 4  | 4  | 4  | 3  |
| 5  | 4  | 1  | 4  |
| 3  | 4  | 5  | 3  |
| 5  | 4  | 3  | 3  |
| 3  | 4  | 3  | 4  |
| 5  | 4  | 5  | 4  |
| 3  | 3  | 3  | 3  |
| 11 | 15 | 29 | 23 |
| 21 | 44 | 44 | 38 |
| 47 | 59 | 60 | 75 |
| 79 | 66 | 51 | 49 |
| 45 | 19 | 19 | 18 |





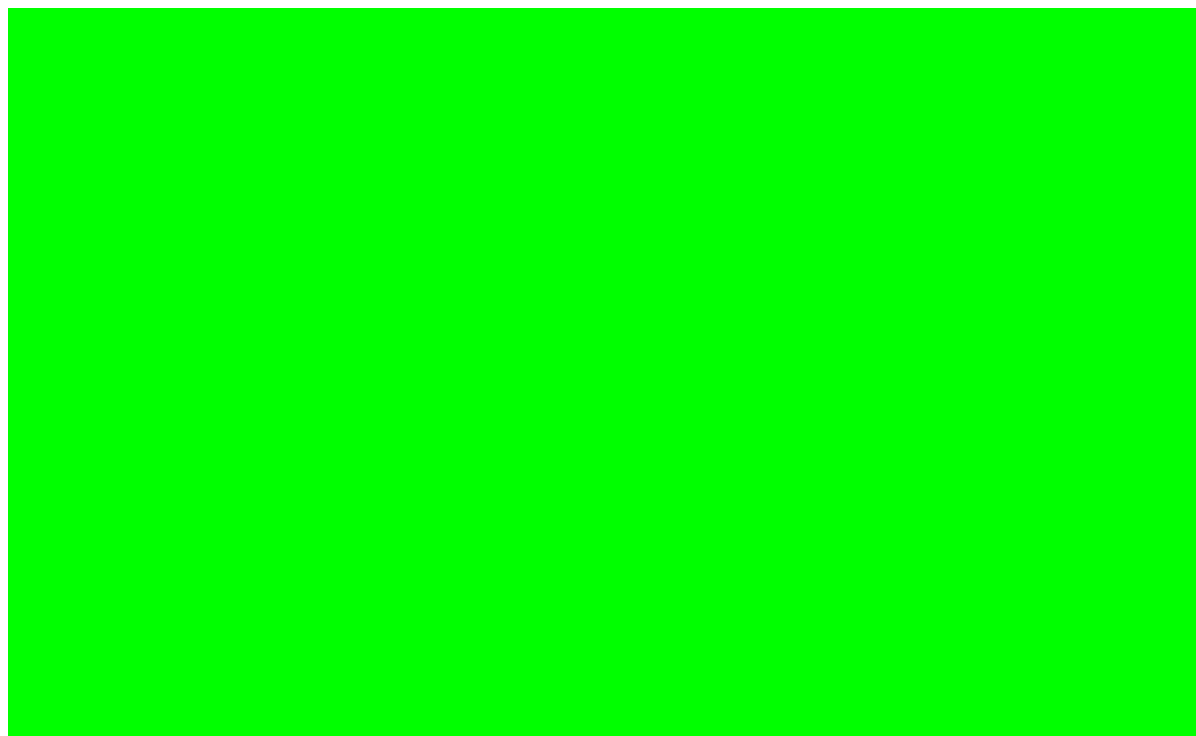

|                          |                      |                      |
|--------------------------|----------------------|----------------------|
| Other, please specify    | Who would be the mos | Who would be the mos |
|                          | 3                    | 5                    |
| Different socioeconomic  | 3                    | 5                    |
|                          | 3                    | 3                    |
| People in Israel are wor | 2                    | 1                    |
|                          | 2                    | 5                    |
|                          | 1                    | 1                    |
|                          | 1                    | 3                    |
|                          | 1                    | 4                    |
|                          | 4                    | 4                    |
|                          | 1                    | 3                    |
|                          | 1                    | 3                    |
|                          | 5                    | 5                    |
|                          | 5                    | 5                    |
|                          | 4                    | 5                    |
|                          | 5                    | 5                    |
|                          | 4                    | 4                    |
|                          | 1                    | 4                    |
|                          | 4                    | 5                    |
|                          | 4                    | 5                    |
|                          | 2                    | 3                    |
|                          | 5                    | 5                    |
|                          | 4                    | 5                    |
|                          | 3                    | 5                    |
|                          | 3                    | 4                    |
|                          | 5                    | 5                    |
|                          | 3                    | 3                    |
|                          | 4                    | 4                    |
|                          | 4                    | 4                    |
| Presentado como catás    | 5                    | 5                    |
|                          | 2                    | 4                    |
|                          | 4                    | 5                    |
|                          | 5                    | 5                    |
|                          | 3                    | 2                    |
|                          | 3                    | 5                    |
|                          | 5                    | 5                    |
|                          | 3                    | 5                    |
|                          | 1                    | 3                    |
|                          | 2                    | 4                    |
|                          | 2                    | 4                    |
|                          | 3                    | 3                    |
|                          | 3                    | 5                    |
|                          | 5                    | 5                    |
|                          | 4                    | 4                    |
|                          | 2                    | 4                    |
|                          | 1                    | 3                    |
| Create more interest ur  | 4                    | 5                    |
|                          | 1                    | 5                    |

|                            |   |   |
|----------------------------|---|---|
|                            | 3 | 4 |
|                            | 5 | 5 |
|                            | 4 | 4 |
|                            | 3 | 3 |
|                            | 4 | 4 |
|                            | 2 | 4 |
|                            | 4 | 5 |
|                            | 4 | 4 |
|                            | 4 | 4 |
|                            | 5 | 5 |
|                            | 4 | 5 |
|                            | 4 | 5 |
|                            | 4 | 5 |
|                            | 5 | 5 |
|                            | 2 | 5 |
|                            | 5 | 5 |
| News presenters are of     | 5 | 5 |
|                            | 4 | 5 |
|                            | 4 | 4 |
| The people im my cont      | 4 | 5 |
|                            | 3 | 4 |
|                            | 5 | 5 |
|                            | 5 | 5 |
|                            | 3 | 4 |
|                            | 5 | 5 |
|                            | 5 | 5 |
|                            | 4 | 4 |
| People (the audience) c    | 4 | 4 |
| Deficiency in politician's | 5 | 5 |
| Deficiency in politician's | 5 | 5 |
|                            | 2 | 4 |
|                            | 4 | 4 |
|                            | 4 | 4 |
|                            | 4 | 5 |
| Knowledge and availab      | 4 | 5 |
|                            | 3 | 3 |
|                            | 3 | 5 |
|                            | 3 | 5 |
| Climate change inheren     | 3 | 4 |
|                            | 4 | 5 |
|                            | 1 | 4 |
|                            | 4 | 4 |
| In Colombia, environme     | 5 | 5 |
|                            | 3 | 5 |
| most people don't talk a   | 4 | 5 |
|                            | 2 | 4 |
|                            | 4 | 5 |
| My answers are reflecti    | 4 | 5 |

|                            |   |   |
|----------------------------|---|---|
|                            | 3 | 3 |
|                            | 3 | 4 |
|                            | 4 | 5 |
|                            | 1 | 4 |
|                            | 4 | 4 |
|                            | 4 | 4 |
|                            | 2 | 4 |
|                            | 3 | 4 |
|                            | 5 | 5 |
|                            | 3 | 4 |
| It is hard,to keep Climate | 4 | 5 |
|                            | 5 | 4 |
|                            | 2 | 4 |
| Political interest         | 4 | 4 |
|                            | 4 | 4 |
|                            | 4 | 5 |
|                            | 5 | 5 |
|                            | 4 | 5 |
|                            | 1 | 5 |
|                            | 5 | 4 |
|                            | 4 | 5 |
|                            | 3 | 5 |
|                            | 1 | 5 |
|                            | 3 | 4 |
|                            | 3 | 5 |
| Climate change turned      | 5 | 5 |
|                            | 4 | 5 |
|                            | 3 | 5 |
|                            | 2 | 4 |
|                            | 4 | 5 |
|                            | 5 | 5 |
|                            | 5 | 5 |
|                            | 5 | 5 |
|                            | 5 | 5 |
|                            | 3 | 5 |
|                            | 4 | 5 |
|                            | 2 | 4 |
|                            | 5 | 5 |
|                            | 2 | 5 |
|                            | 5 | 4 |
|                            | 1 | 5 |
|                            | 5 | 5 |
| Showing solutions are i    | 2 | 4 |
|                            | 3 | 4 |
|                            | 4 | 5 |
|                            | 1 | 4 |
|                            | 5 | 5 |
|                            | 3 | 5 |

|                             |   |   |
|-----------------------------|---|---|
|                             | 3 | 4 |
|                             | 4 | 5 |
|                             | 2 | 4 |
|                             | 4 | 5 |
|                             | 3 | 5 |
|                             | 2 | 4 |
|                             | 1 | 2 |
|                             | 5 | 5 |
|                             | 5 | 5 |
|                             | 5 | 5 |
|                             | 4 | 4 |
|                             | 3 | 3 |
|                             | 4 | 5 |
|                             | 5 | 5 |
|                             | 3 | 4 |
|                             | 4 | 5 |
|                             | 4 | 5 |
| psychology and behavior     | 5 | 5 |
|                             | 4 | 5 |
| Hay que dar respuestas      | 5 | 5 |
|                             | 3 | 5 |
|                             | 3 | 3 |
| n/a                         | 5 | 5 |
|                             | 4 | 5 |
|                             | 5 | 5 |
|                             | 4 | 5 |
|                             | 3 | 5 |
|                             | 4 | 5 |
|                             | 4 | 4 |
|                             | 5 | 5 |
|                             | 3 | 3 |
|                             | 5 | 5 |
| Few minutes or seconds      | 4 | 5 |
|                             | 4 | 5 |
|                             | 3 | 3 |
|                             | 5 | 5 |
| Our will to talk scientific | 5 | 4 |
| Our will to talk scientific | 5 | 4 |
|                             | 2 | 4 |
|                             | 5 | 5 |
|                             | 5 | 5 |
|                             | 4 | 5 |
|                             | 2 | 4 |
| Media cannot all be lumped  | 3 | 4 |
|                             | 5 | 5 |
|                             | 4 | 4 |
|                             | 4 | 4 |
|                             | 1 | 5 |

No

|    |     |
|----|-----|
| 5  | 5   |
| 3  | 4   |
| 5  | 5   |
| 5  | 5   |
| 4  | 5   |
| 4  | 4   |
| 4  | 5   |
| 5  | 5   |
| 4  | 5   |
| 4  | 5   |
| 5  | 5   |
| 5  | 5   |
| 17 | 2   |
| 21 | 2   |
| 42 | 16  |
| 67 | 64  |
| 56 | 119 |

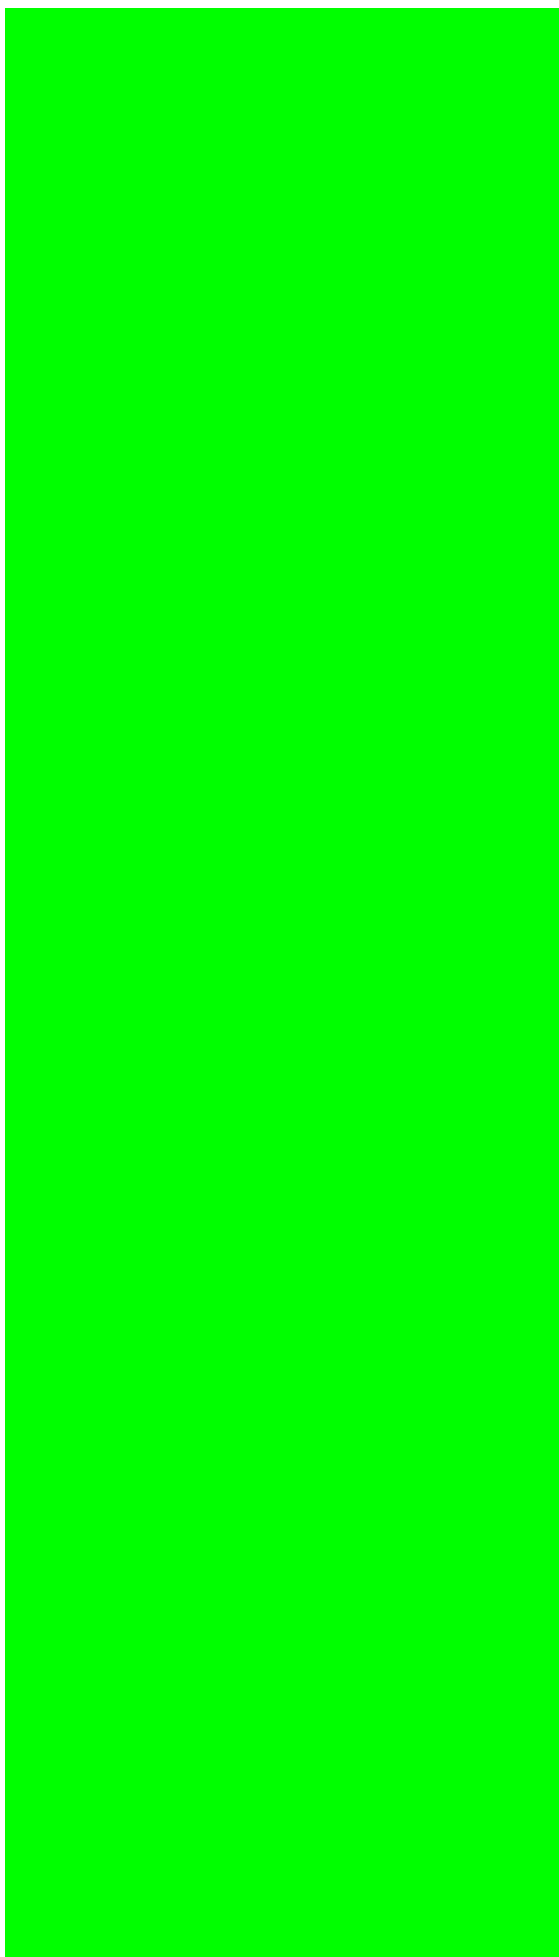

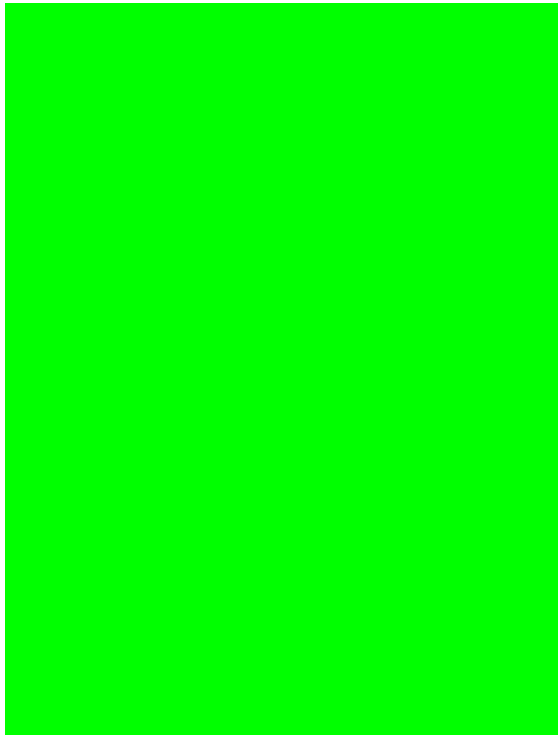



| Who would be the most appropriate communication partner for the person with the most appropriate communication partner? | Who would be the most appropriate communication partner for the person with the most appropriate communication partner? |
|-------------------------------------------------------------------------------------------------------------------------|-------------------------------------------------------------------------------------------------------------------------|
| 1                                                                                                                       | 4                                                                                                                       |
| 5                                                                                                                       | 3                                                                                                                       |
| 3                                                                                                                       | 3                                                                                                                       |
| 4                                                                                                                       | 1                                                                                                                       |
| 2                                                                                                                       | 4                                                                                                                       |
| 2                                                                                                                       | 1                                                                                                                       |
| 4                                                                                                                       | 4                                                                                                                       |
| 2                                                                                                                       | 4                                                                                                                       |
| 3                                                                                                                       | 3                                                                                                                       |
| 1                                                                                                                       | 3                                                                                                                       |
| 1                                                                                                                       | 2                                                                                                                       |
| 3                                                                                                                       | 5                                                                                                                       |
| 2                                                                                                                       | 5                                                                                                                       |
| 5                                                                                                                       | 5                                                                                                                       |
| 1                                                                                                                       | 1                                                                                                                       |
| 1                                                                                                                       | 3                                                                                                                       |
| 1                                                                                                                       | 4                                                                                                                       |
| 1                                                                                                                       | 5                                                                                                                       |
| 1                                                                                                                       | 5                                                                                                                       |
| 3                                                                                                                       | 5                                                                                                                       |
| 5                                                                                                                       | 5                                                                                                                       |
| 3                                                                                                                       | 5                                                                                                                       |
| 1                                                                                                                       | 3                                                                                                                       |
| 2                                                                                                                       | 4                                                                                                                       |
| 5                                                                                                                       | 5                                                                                                                       |
| 1                                                                                                                       | 5                                                                                                                       |
| 2                                                                                                                       | 4                                                                                                                       |
| 4                                                                                                                       | 4                                                                                                                       |
| 1                                                                                                                       | 5                                                                                                                       |
| 1                                                                                                                       | 5                                                                                                                       |
| 2                                                                                                                       | 5                                                                                                                       |
| 5                                                                                                                       | 5                                                                                                                       |
| 2                                                                                                                       | 4                                                                                                                       |
| 3                                                                                                                       | 5                                                                                                                       |
| 3                                                                                                                       | 4                                                                                                                       |
| 1                                                                                                                       | 4                                                                                                                       |
| 1                                                                                                                       | 1                                                                                                                       |
| 1                                                                                                                       | 3                                                                                                                       |
| 3                                                                                                                       | 4                                                                                                                       |
| 3                                                                                                                       | 4                                                                                                                       |
| 2                                                                                                                       | 3                                                                                                                       |
| 4                                                                                                                       | 5                                                                                                                       |
| 4                                                                                                                       | 5                                                                                                                       |
| 2                                                                                                                       | 3                                                                                                                       |
| 1                                                                                                                       | 1                                                                                                                       |
| 4                                                                                                                       | 4                                                                                                                       |
| 1                                                                                                                       | 5                                                                                                                       |

|  |   |   |
|--|---|---|
|  | 4 | 4 |
|  | 5 | 5 |
|  | 4 | 4 |
|  | 3 | 3 |
|  | 1 | 3 |
|  | 2 | 5 |
|  | 4 | 5 |
|  | 4 | 4 |
|  | 3 | 3 |
|  | 1 | 3 |
|  | 4 | 5 |
|  | 4 | 5 |
|  | 4 | 4 |
|  | 4 | 5 |
|  | 4 | 4 |
|  | 4 | 5 |
|  | 3 | 2 |
|  | 2 | 5 |
|  | 1 | 3 |
|  | 4 | 5 |
|  | 3 | 4 |
|  | 5 | 5 |
|  | 5 | 5 |
|  | 3 | 5 |
|  | 5 | 5 |
|  | 5 | 5 |
|  | 1 | 4 |
|  | 1 | 4 |
|  | 3 | 5 |
|  | 3 | 5 |
|  | 4 | 4 |
|  | 4 | 4 |
|  | 4 | 4 |
|  | 4 | 4 |
|  | 5 | 5 |
|  | 4 | 5 |
|  | 3 | 1 |
|  | 1 | 3 |
|  | 2 | 4 |
|  | 3 | 4 |
|  | 2 | 5 |
|  | 2 | 5 |
|  | 4 | 5 |
|  | 4 | 5 |
|  | 4 | 4 |
|  | 4 | 4 |
|  | 1 | 4 |
|  | 4 | 3 |
|  | 3 | 4 |

|  |   |   |
|--|---|---|
|  | 3 | 3 |
|  | 3 | 5 |
|  | 4 | 5 |
|  | 4 | 3 |
|  | 4 | 4 |
|  | 4 | 2 |
|  | 2 | 4 |
|  | 3 | 4 |
|  | 5 | 5 |
|  | 4 | 4 |
|  | 4 | 4 |
|  | 4 | 5 |
|  | 2 | 3 |
|  | 4 | 4 |
|  | 4 | 4 |
|  | 3 | 5 |
|  | 5 | 5 |
|  | 1 | 5 |
|  | 3 | 5 |
|  | 4 | 5 |
|  | 3 | 4 |
|  | 5 | 5 |
|  | 3 | 5 |
|  | 4 | 4 |
|  | 3 | 5 |
|  | 5 | 5 |
|  | 3 | 5 |
|  | 1 | 5 |
|  | 3 | 4 |
|  | 1 | 4 |
|  | 5 | 5 |
|  | 5 | 5 |
|  | 1 | 4 |
|  | 5 | 5 |
|  | 3 | 4 |
|  | 3 | 4 |
|  | 3 | 3 |
|  | 1 | 5 |
|  | 3 | 5 |
|  | 4 | 4 |
|  | 1 | 5 |
|  | 2 | 5 |
|  | 3 | 5 |
|  | 3 | 4 |
|  | 2 | 4 |
|  | 3 | 5 |
|  | 3 | 5 |
|  | 3 | 5 |

|  |   |   |
|--|---|---|
|  | 4 | 4 |
|  | 4 | 5 |
|  | 1 | 5 |
|  | 3 | 5 |
|  | 1 | 5 |
|  | 4 | 4 |
|  | 2 | 5 |
|  | 2 | 5 |
|  | 3 | 5 |
|  | 3 | 5 |
|  | 2 | 4 |
|  | 1 | 4 |
|  | 4 | 5 |
|  | 5 | 5 |
|  | 1 | 4 |
|  | 2 | 3 |
|  | 2 | 4 |
|  | 5 | 5 |
|  | 4 | 5 |
|  | 3 | 5 |
|  | 4 | 4 |
|  | 3 | 4 |
|  | 5 | 5 |
|  | 4 | 5 |
|  | 5 | 5 |
|  | 3 | 5 |
|  | 3 | 5 |
|  | 3 | 5 |
|  | 3 | 5 |
|  | 5 | 5 |
|  | 3 | 5 |
|  | 5 | 5 |
|  | 1 | 4 |
|  | 4 | 4 |
|  | 3 | 4 |
|  | 4 | 5 |
|  | 3 | 4 |
|  | 3 | 4 |
|  | 1 | 4 |
|  | 1 | 5 |
|  | 2 | 4 |
|  | 4 | 4 |
|  | 2 | 4 |
|  | 5 | 4 |
|  | 5 | 5 |
|  | 2 | 5 |
|  | 4 | 5 |
|  | 3 | 4 |

|    |     |
|----|-----|
| 5  | 5   |
| 3  | 5   |
| 5  | 4   |
| 5  | 5   |
| 4  | 4   |
| 4  | 4   |
| 4  | 4   |
| 1  | 1   |
| 3  | 5   |
| 3  | 3   |
| 5  | 5   |
| 3  | 5   |
| 38 | 7   |
| 27 | 3   |
| 56 | 22  |
| 52 | 71  |
| 30 | 100 |

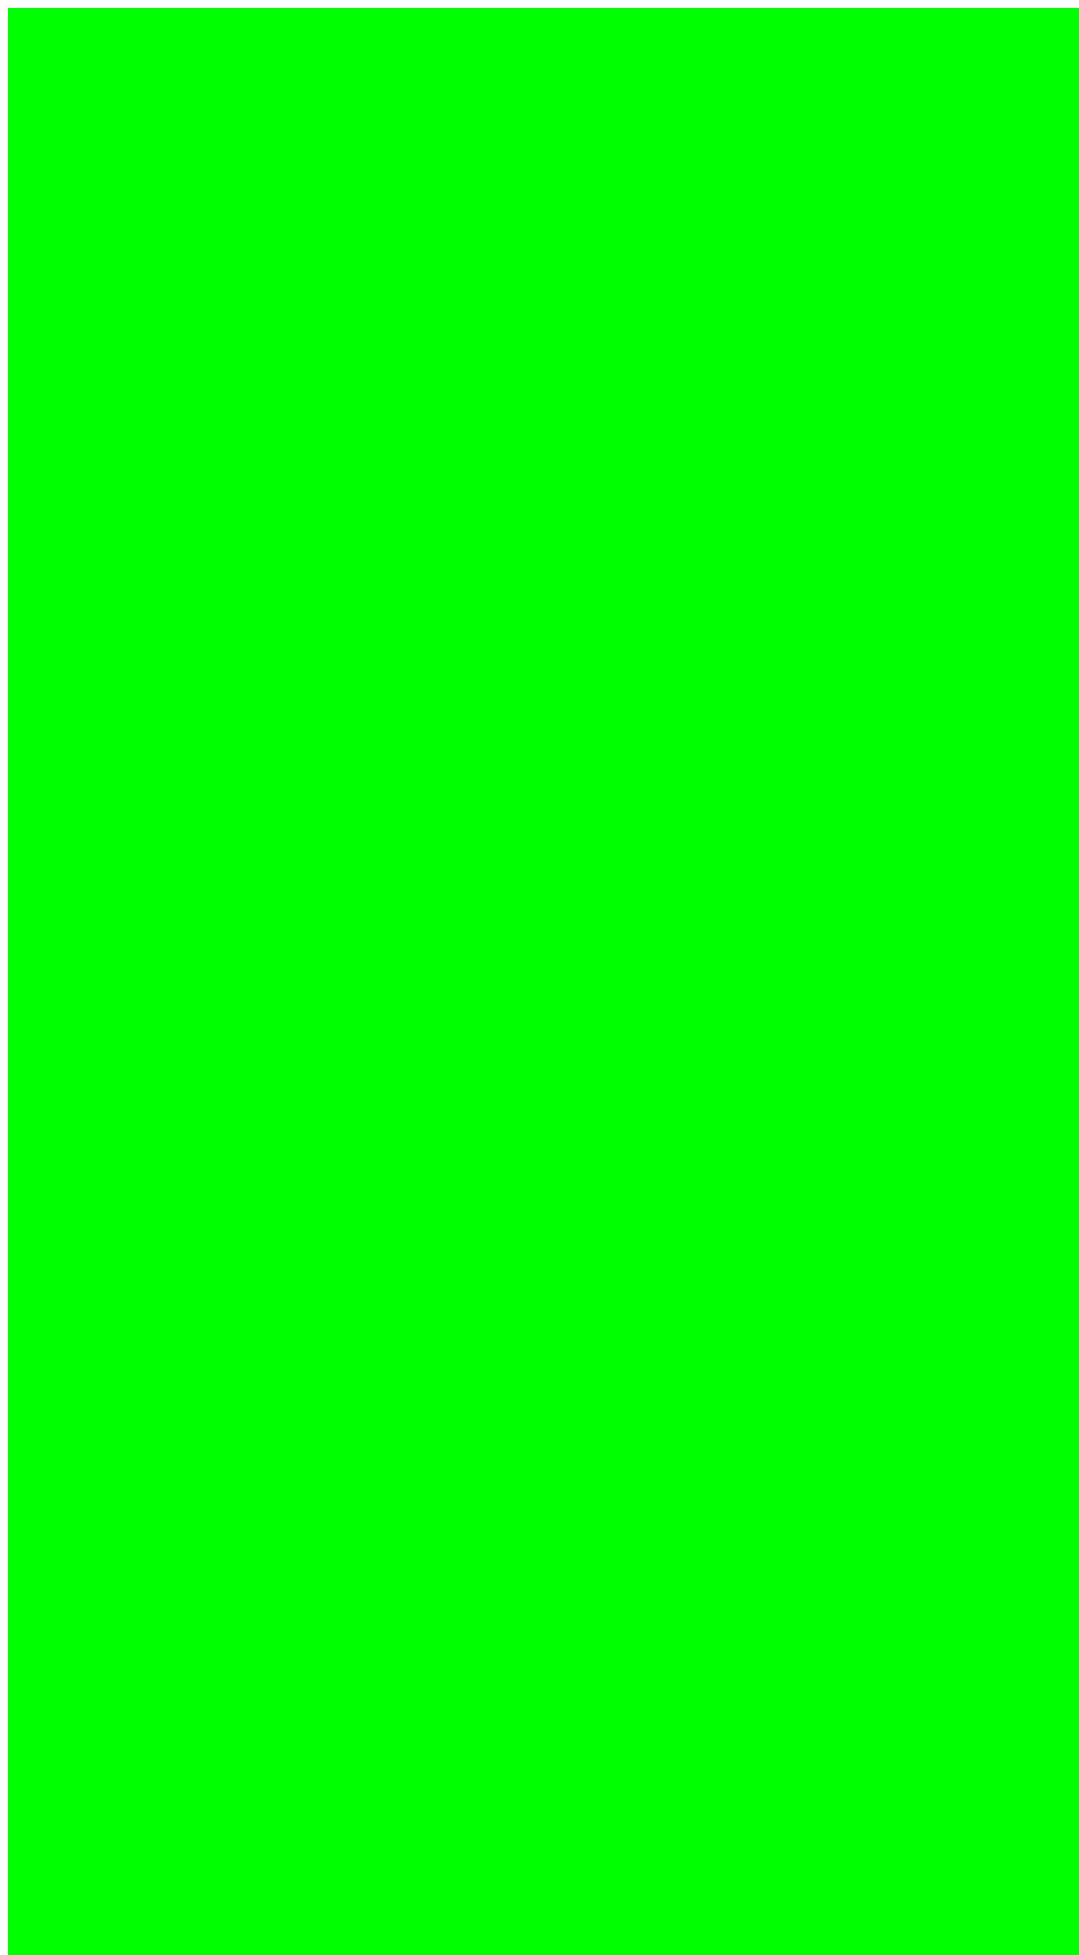

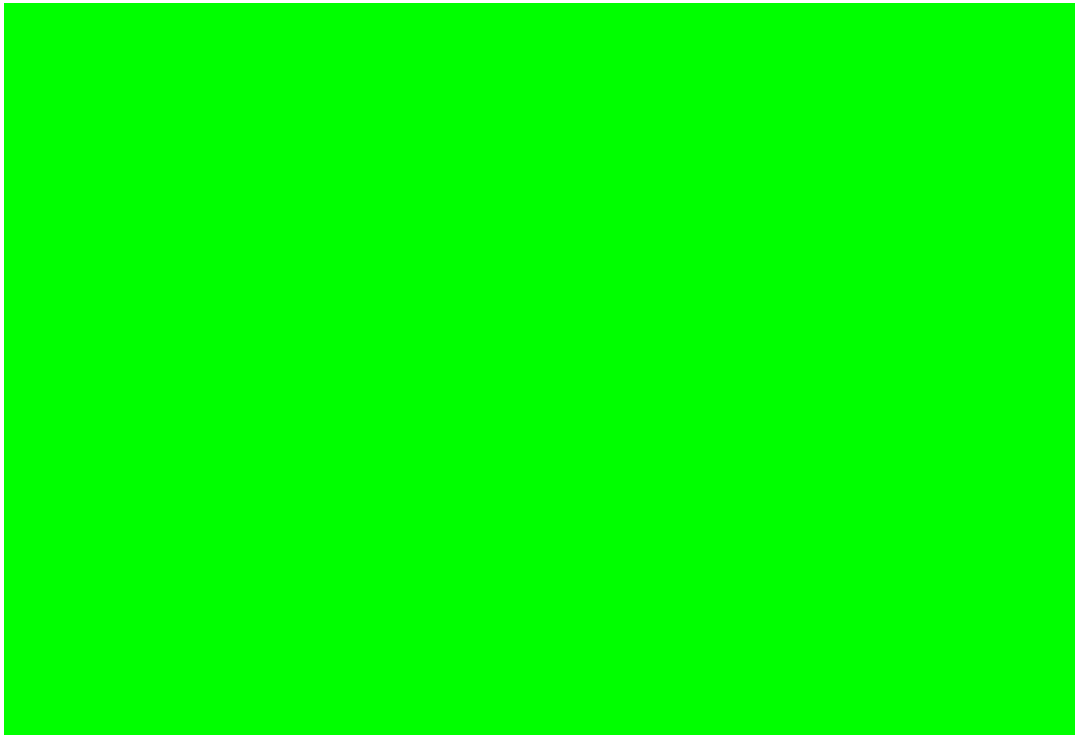

| Who would be the most approp | Who would be the mos | Who would be the mos |
|------------------------------|----------------------|----------------------|
| 2                            | 5                    | 2                    |
| 4                            | 4                    | 3                    |
| 5                            | 5                    | 3                    |
| 1                            | 1                    | 3                    |
| 5                            | 4                    | 3                    |
| 1                            | 2                    | 2                    |
| 4                            | 1                    | 3                    |
| 4                            | 5                    | 4                    |
| 2                            | 4                    | 4                    |
| 3                            | 3                    | 2                    |
| 1                            | 3                    | 1                    |
| 5                            | 5                    | 5                    |
| 4                            | 2                    | 3                    |
| 5                            | 5                    | 5                    |
| 1                            | 5                    | 1                    |
| 4                            | 4                    | 4                    |
| 5                            | 4                    | 3                    |
| 5                            | 5                    | 2                    |
| 5                            | 5                    | 2                    |
| 5                            | 5                    | 5                    |
| 5                            | 5                    | 5                    |
| 4                            | 5                    | 3                    |
| 5                            | 5                    | 5                    |
| 5                            | 4                    | 5                    |
| 5                            | 5                    | 5                    |
| 5                            | 5                    | 5                    |
| 3                            | 5                    | 3                    |
| 4                            | 4                    | 4                    |
| 5                            | 5                    | 1                    |
| 5                            | 2                    | 3                    |
| 5                            | 5                    | 5                    |
| 5                            | 5                    | 5                    |
| 4                            | 4                    | 3                    |
| 3                            | 5                    | 3                    |
| 5                            | 5                    | 4                    |
| 4                            | 5                    | 4                    |
| 2                            | 3                    | 1                    |
| 4                            | 4                    | 5                    |
| 4                            | 2                    | 3                    |
| 4                            | 3                    | 3                    |
| 4                            | 4                    | 3                    |
| 5                            | 5                    | 5                    |
| 5                            | 5                    | 4                    |
| 3                            | 5                    | 2                    |
| 3                            | 3                    | 1                    |
| 4                            | 5                    | 4                    |
| 5                            | 5                    | 5                    |



|   |   |   |
|---|---|---|
| 5 | 5 | 5 |
| 5 | 5 | 5 |
| 4 | 4 | 5 |
| 3 | 4 | 3 |
| 4 | 4 | 3 |
| 5 | 5 | 5 |
| 5 | 5 | 5 |
| 4 | 5 | 4 |
| 2 | 4 | 2 |
| 4 | 4 | 4 |
| 5 | 5 | 5 |
| 5 | 5 | 5 |
| 4 | 5 | 3 |
| 5 | 4 | 3 |
| 5 | 5 | 4 |
| 4 | 4 | 3 |
| 2 | 5 | 3 |
| 5 | 5 | 4 |
| 4 | 4 | 4 |
| 5 | 5 | 4 |
| 4 | 5 | 4 |
| 5 | 5 | 5 |
| 5 | 5 | 5 |
| 5 | 5 | 3 |
| 5 | 5 | 4 |
| 5 | 5 | 5 |
| 4 | 4 | 4 |
| 4 | 5 | 4 |
| 5 | 5 | 5 |
| 5 | 5 | 5 |
| 3 | 5 | 2 |
| 4 | 4 | 3 |
| 4 | 4 | 4 |
| 5 | 5 | 5 |
| 4 | 4 | 4 |
| 3 | 5 | 4 |
| 3 | 4 | 3 |
| 5 | 4 | 3 |
| 4 | 4 | 4 |
| 5 | 5 | 5 |
| 5 | 5 | 4 |
| 5 | 5 | 3 |
| 2 | 4 | 5 |
| 4 | 3 | 4 |
| 5 | 5 | 4 |
| 4 | 5 | 3 |
| 3 | 5 | 4 |
| 4 | 5 | 3 |

|  |   |   |   |
|--|---|---|---|
|  | 3 | 4 | 2 |
|  | 5 | 5 | 4 |
|  | 5 | 5 | 5 |
|  | 5 | 5 | 4 |
|  | 4 | 4 | 4 |
|  | 4 | 4 | 4 |
|  | 5 | 4 | 4 |
|  | 4 | 4 | 4 |
|  | 5 | 5 | 5 |
|  | 5 | 3 | 5 |
|  | 5 | 5 | 4 |
|  | 5 | 5 | 5 |
|  | 4 | 4 | 2 |
|  | 4 | 4 | 4 |
|  | 3 | 4 | 3 |
|  | 5 | 5 | 4 |
|  | 5 | 5 | 4 |
|  | 5 | 5 | 5 |
|  | 5 | 5 | 3 |
|  | 3 | 4 | 2 |
|  | 4 | 5 | 4 |
|  | 5 | 5 | 5 |
|  | 5 | 5 | 5 |
|  | 4 | 4 | 3 |
|  | 4 | 5 | 5 |
|  | 5 | 5 | 5 |
|  | 5 | 5 | 3 |
|  | 5 | 5 | 3 |
|  | 5 | 4 | 3 |
|  | 2 | 4 | 2 |
|  | 5 | 5 | 5 |
|  | 3 | 4 | 5 |
|  | 4 | 5 | 4 |
|  | 5 | 5 | 5 |
|  | 4 | 5 | 4 |
|  | 3 | 5 | 4 |
|  | 4 | 5 | 1 |
|  | 5 | 5 | 5 |
|  | 4 | 5 | 3 |
|  | 4 | 5 | 2 |
|  | 5 | 5 | 2 |
|  | 5 | 5 | 5 |
|  | 5 | 5 | 4 |
|  | 3 | 4 | 3 |
|  | 4 | 4 | 4 |
|  | 4 | 5 | 5 |
|  | 5 | 3 | 5 |
|  | 3 | 5 | 5 |

|   |   |   |
|---|---|---|
| 5 | 5 | 4 |
| 5 | 5 | 5 |
| 3 | 5 | 2 |
| 5 | 5 | 5 |
| 5 | 5 | 3 |
| 4 | 4 | 3 |
| 3 | 2 | 2 |
| 2 | 5 | 5 |
| 5 | 5 | 4 |
| 5 | 5 | 5 |
| 4 | 5 | 4 |
| 4 | 5 | 3 |
| 5 | 5 | 5 |
| 3 | 5 | 5 |
| 5 | 5 | 3 |
| 4 | 4 | 4 |
| 4 | 5 | 4 |
| 5 | 5 | 5 |
| 5 | 5 | 5 |
| 5 | 5 | 4 |
| 5 | 5 | 4 |
| 4 | 5 | 3 |
| 5 | 5 | 5 |
| 5 | 5 | 3 |
| 5 | 5 | 5 |
| 5 | 5 | 5 |
| 5 | 5 | 3 |
| 5 | 5 | 4 |
| 5 | 5 | 4 |
| 5 | 5 | 5 |
| 5 | 5 | 5 |
| 5 | 5 | 5 |
| 4 | 5 | 4 |
| 4 | 5 | 4 |
| 4 | 4 | 4 |
| 5 | 5 | 4 |
| 3 | 5 | 4 |
| 3 | 5 | 4 |
| 4 | 5 | 4 |
| 5 | 5 | 1 |
| 3 | 5 | 3 |
| 3 | 5 | 5 |
| 4 | 4 | 4 |
| 3 | 5 | 4 |
| 5 | 5 | 5 |
| 5 | 5 | 5 |
| 5 | 5 | 5 |
| 4 | 5 | 3 |

|     |     |    |
|-----|-----|----|
| 5   | 5   | 5  |
| 5   | 5   | 4  |
| 5   | 5   | 4  |
| 5   | 5   | 5  |
| 5   | 5   | 4  |
| 4   | 5   | 5  |
| 4   | 5   | 5  |
| 2   | 5   | 1  |
| 5   | 5   | 3  |
| 5   | 4   | 4  |
| 4   | 5   | 4  |
| 5   | 4   | 5  |
| 4   | 2   | 8  |
| 9   | 5   | 16 |
| 25  | 8   | 46 |
| 61  | 47  | 65 |
| 104 | 141 | 68 |

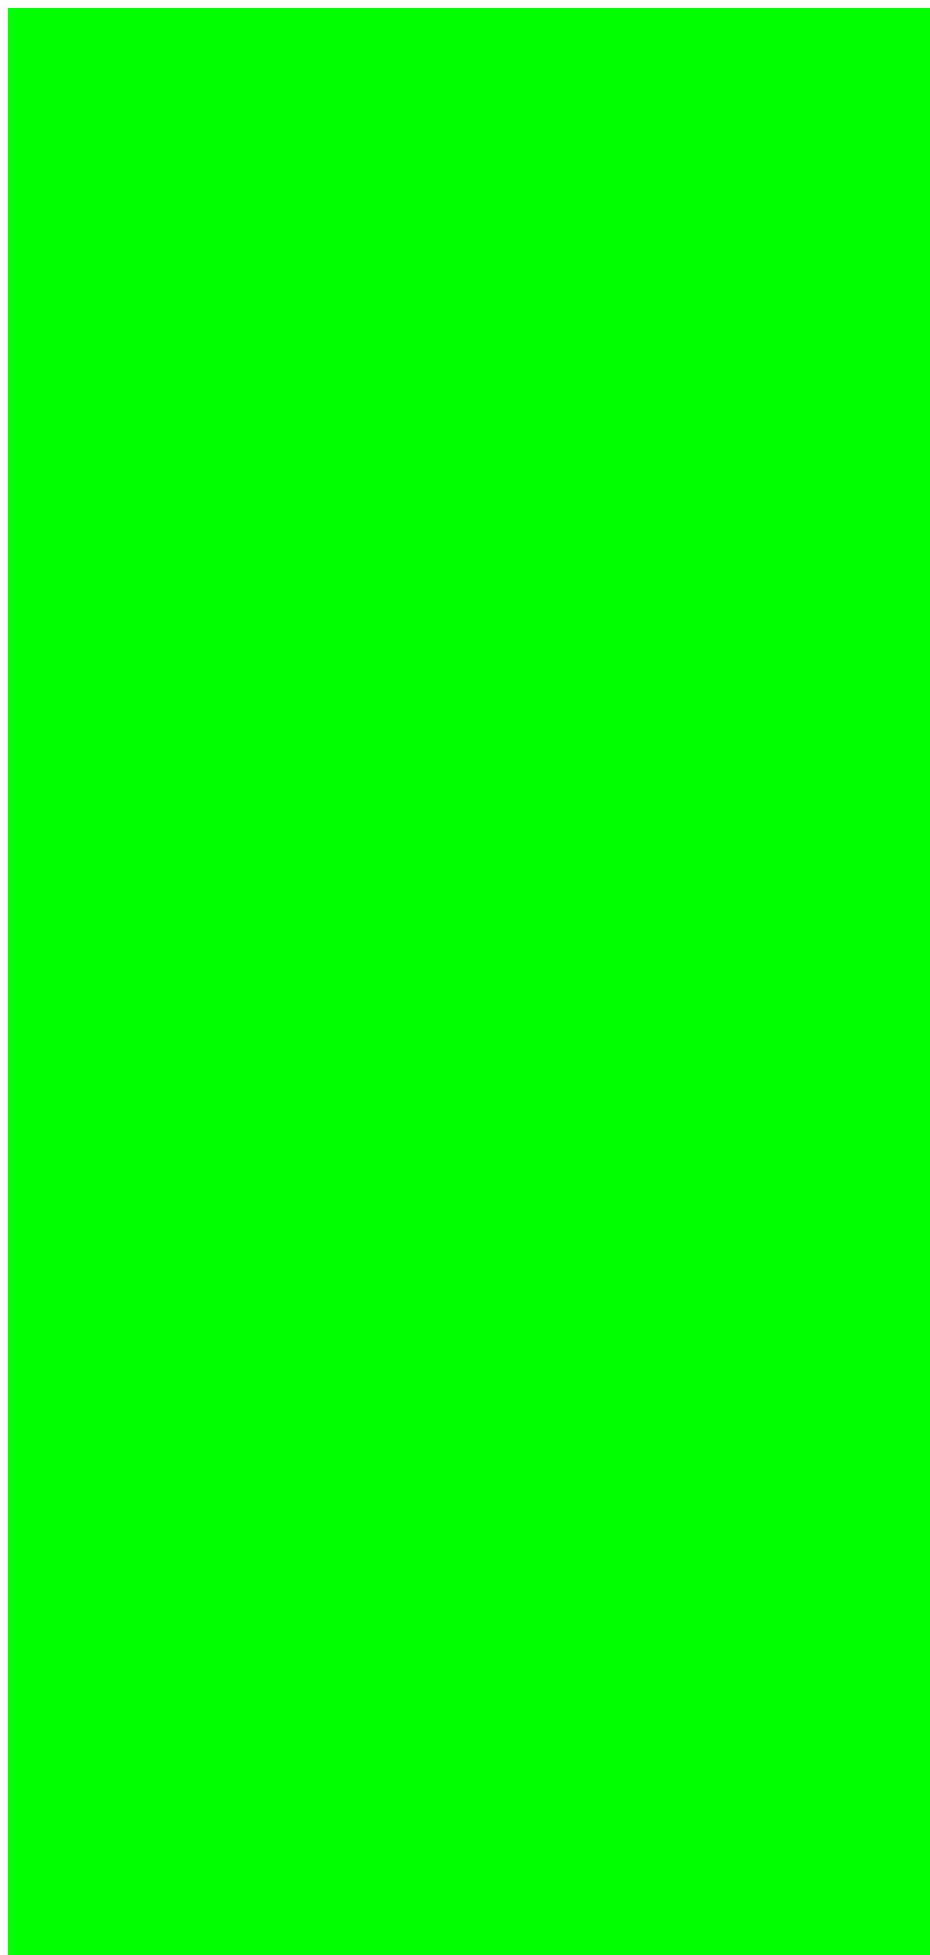

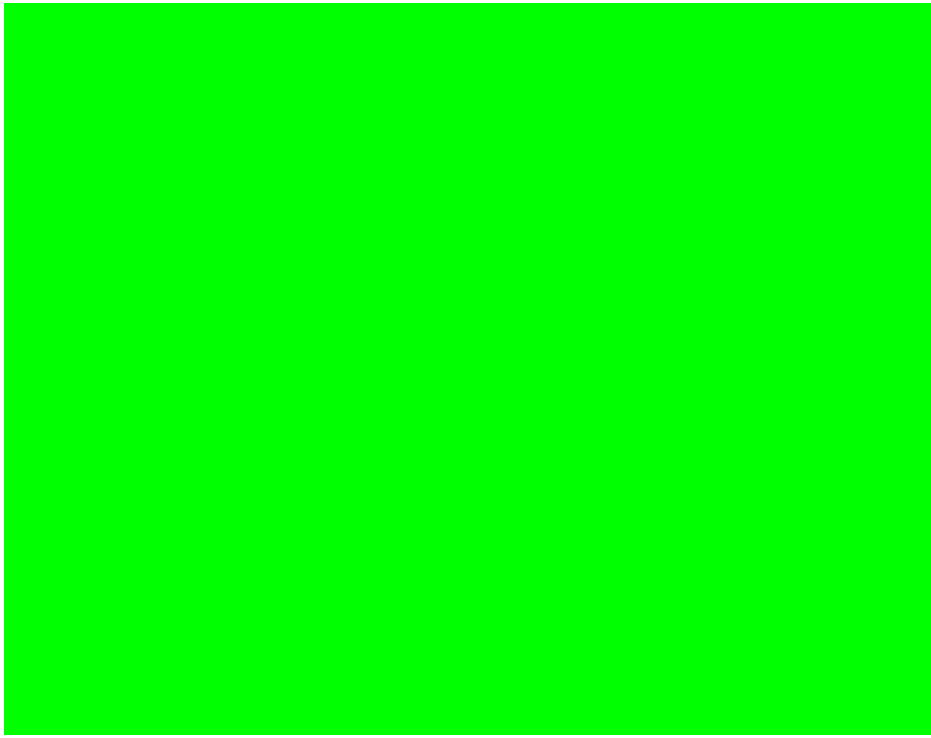

| Who would be the most appropriate person to be the president of the United States? | Who would be the most appropriate person to be the president of the United States? | Who would be the most appropriate person to be the president of the United States? | Who would be the most appropriate person to be the president of the United States? |
|------------------------------------------------------------------------------------|------------------------------------------------------------------------------------|------------------------------------------------------------------------------------|------------------------------------------------------------------------------------|
| 5                                                                                  | 1                                                                                  | 5                                                                                  | 2                                                                                  |
| 2                                                                                  | 2                                                                                  | 5                                                                                  | 2                                                                                  |
| 4                                                                                  | 2                                                                                  | 4                                                                                  | 1                                                                                  |
| 1                                                                                  | 5                                                                                  | 1                                                                                  | 1                                                                                  |
| 5                                                                                  | 1                                                                                  | 4                                                                                  | 3                                                                                  |
| 4                                                                                  | 5                                                                                  | 1                                                                                  | 2                                                                                  |
| 4                                                                                  | 2                                                                                  | 5                                                                                  | 4                                                                                  |
| 5                                                                                  | 1                                                                                  | 4                                                                                  | 3                                                                                  |
| 3                                                                                  | 1                                                                                  | 4                                                                                  | 2                                                                                  |
| 3                                                                                  | 3                                                                                  | 3                                                                                  | 2                                                                                  |
| 4                                                                                  | 1                                                                                  | 3                                                                                  | 1                                                                                  |
| 5                                                                                  | 1                                                                                  | 5                                                                                  | 5                                                                                  |
| 4                                                                                  | 1                                                                                  | 5                                                                                  | 5                                                                                  |
| 5                                                                                  | 1                                                                                  | 5                                                                                  | 5                                                                                  |
| 3                                                                                  | 1                                                                                  | 5                                                                                  | 1                                                                                  |
| 2                                                                                  | 1                                                                                  | 4                                                                                  | 1                                                                                  |
| 2                                                                                  | 1                                                                                  | 5                                                                                  | 4                                                                                  |
| 3                                                                                  | 1                                                                                  | 3                                                                                  | 1                                                                                  |
| 3                                                                                  | 1                                                                                  | 3                                                                                  | 1                                                                                  |
| 5                                                                                  | 1                                                                                  | 5                                                                                  | 5                                                                                  |
| 5                                                                                  | 1                                                                                  | 5                                                                                  | 5                                                                                  |
| 4                                                                                  | 1                                                                                  | 5                                                                                  | 2                                                                                  |
| 3                                                                                  | 1                                                                                  | 5                                                                                  | 3                                                                                  |
| 3                                                                                  | 1                                                                                  | 5                                                                                  | 3                                                                                  |
| 5                                                                                  | 1                                                                                  | 5                                                                                  | 5                                                                                  |
| 5                                                                                  | 1                                                                                  | 5                                                                                  | 5                                                                                  |
| 4                                                                                  | 2                                                                                  | 4                                                                                  | 2                                                                                  |
| 4                                                                                  | 1                                                                                  | 5                                                                                  | 2                                                                                  |
| 5                                                                                  | 1                                                                                  | 5                                                                                  | 5                                                                                  |
| 3                                                                                  | 1                                                                                  | 4                                                                                  | 3                                                                                  |
| 5                                                                                  | 1                                                                                  | 5                                                                                  | 4                                                                                  |
| 5                                                                                  | 1                                                                                  | 5                                                                                  | 5                                                                                  |
| 4                                                                                  | 1                                                                                  | 5                                                                                  | 5                                                                                  |
| 4                                                                                  | 1                                                                                  | 5                                                                                  | 3                                                                                  |
| 4                                                                                  | 4                                                                                  | 5                                                                                  | 3                                                                                  |
| 4                                                                                  | 1                                                                                  | 5                                                                                  | 3                                                                                  |
| 3                                                                                  | 1                                                                                  | 1                                                                                  | 1                                                                                  |
| 3                                                                                  | 1                                                                                  | 4                                                                                  | 3                                                                                  |
| 4                                                                                  | 1                                                                                  | 4                                                                                  | 4                                                                                  |
| 3                                                                                  | 2                                                                                  | 3                                                                                  | 4                                                                                  |
| 4                                                                                  | 1                                                                                  | 4                                                                                  | 2                                                                                  |
| 5                                                                                  | 1                                                                                  | 3                                                                                  | 5                                                                                  |
| 4                                                                                  | 1                                                                                  | 5                                                                                  | 4                                                                                  |
| 4                                                                                  | 1                                                                                  | 5                                                                                  | 2                                                                                  |
| 1                                                                                  | 1                                                                                  | 3                                                                                  | 1                                                                                  |
| 3                                                                                  | 1                                                                                  | 3                                                                                  | 4                                                                                  |
| 5                                                                                  | 1                                                                                  | 5                                                                                  | 3                                                                                  |

|   |   |   |   |
|---|---|---|---|
| 5 | 4 | 4 | 5 |
| 3 | 1 | 5 | 4 |
| 4 | 3 | 4 | 3 |
| 4 | 1 | 5 | 1 |
| 3 | 1 | 5 | 4 |
| 4 | 1 | 5 | 5 |
| 5 | 1 | 4 | 2 |
| 3 | 2 | 4 | 4 |
| 3 | 1 | 3 | 1 |
| 3 | 1 | 5 | 1 |
| 3 | 3 | 4 | 4 |
| 3 | 3 | 4 | 4 |
| 2 | 1 | 3 | 3 |
| 4 | 1 | 3 | 5 |
| 5 | 3 | 5 | 5 |
| 4 | 3 | 5 | 3 |
| 3 | 1 | 5 | 1 |
| 5 | 1 | 5 | 4 |
| 3 | 1 | 4 | 4 |
| 5 | 1 | 5 | 5 |
| 4 | 1 | 5 | 3 |
| 5 | 1 | 5 | 5 |
| 5 | 1 | 5 | 5 |
| 3 | 1 | 5 | 2 |
| 5 | 1 | 4 | 4 |
| 5 | 2 | 5 | 3 |
| 4 | 1 | 4 | 4 |
| 3 | 1 | 4 | 4 |
| 5 | 1 | 5 | 5 |
| 5 | 1 | 5 | 5 |
| 1 | 1 | 3 | 1 |
| 3 | 1 | 3 | 3 |
| 4 | 1 | 4 | 3 |
| 5 | 1 | 5 | 1 |
| 4 | 1 | 5 | 4 |
| 3 | 1 | 4 | 1 |
| 2 | 1 | 4 | 2 |
| 4 | 1 | 4 | 4 |
| 3 | 1 | 5 | 4 |
| 5 | 1 | 5 | 1 |
| 5 | 1 | 5 | 1 |
| 2 | 2 | 4 | 3 |
| 5 | 1 | 4 | 2 |
| 3 | 1 | 3 | 3 |
| 4 | 1 | 4 | 4 |
| 4 | 1 | 4 | 2 |
| 3 | 1 | 4 | 3 |
| 4 | 1 | 4 | 4 |



|   |   |   |   |
|---|---|---|---|
| 4 | 1 | 3 | 3 |
| 4 | 1 | 5 | 4 |
| 5 | 1 | 5 | 5 |
| 4 | 1 | 4 | 3 |
| 4 | 1 | 5 | 5 |
| 2 | 1 | 4 | 2 |
| 4 | 1 | 5 | 2 |
| 4 | 1 | 4 | 4 |
| 5 | 3 | 5 | 5 |
| 5 | 1 | 5 | 5 |
| 3 | 1 | 4 | 3 |
| 5 | 1 | 5 | 5 |
| 2 | 1 | 5 | 3 |
| 4 | 4 | 4 | 4 |
| 4 | 2 | 4 | 3 |
| 4 | 1 | 5 | 5 |
| 4 | 1 | 5 | 5 |
| 4 | 1 | 5 | 4 |
| 4 | 1 | 5 | 5 |
| 5 | 1 | 3 | 1 |
| 4 | 1 | 4 | 4 |
| 5 | 1 | 3 | 2 |
| 5 | 1 | 5 | 5 |
| 4 | 1 | 4 | 4 |
| 5 | 1 | 4 | 4 |
| 5 | 2 | 5 | 5 |
| 3 | 1 | 5 | 4 |
| 3 | 3 | 5 | 5 |
| 3 | 1 | 3 | 2 |
| 3 | 1 | 4 | 2 |
| 5 | 1 | 5 | 5 |
| 3 | 1 | 4 | 4 |
| 4 | 1 | 5 | 5 |
| 5 | 1 | 4 | 5 |
| 4 | 1 | 5 | 3 |
| 4 | 1 | 4 | 3 |
| 4 | 1 | 5 | 1 |
| 5 | 1 | 5 | 5 |
| 5 | 3 | 2 | 2 |
| 3 | 1 | 2 | 1 |
| 4 | 1 | 5 | 1 |
| 4 | 1 | 5 | 5 |
| 3 | 1 | 4 | 2 |
| 3 | 1 | 3 | 3 |
| 4 | 1 | 4 | 4 |
| 5 | 1 | 5 | 1 |
| 5 | 1 | 5 | 5 |
| 3 | 1 | 5 | 3 |

|   |   |   |   |
|---|---|---|---|
| 4 | 1 | 4 | 4 |
| 5 | 1 | 5 | 1 |
| 2 | 1 | 3 | 1 |
| 5 | 1 | 5 | 5 |
| 5 | 1 | 5 | 5 |
| 3 | 1 | 4 | 2 |
| 1 | 1 | 5 | 1 |
| 5 | 2 | 5 | 2 |
| 3 | 1 | 5 | 4 |
| 5 | 1 | 5 | 5 |
| 4 | 1 | 5 | 4 |
| 4 | 1 | 4 | 2 |
| 5 | 4 | 5 | 4 |
| 5 | 1 | 5 | 3 |
| 3 | 1 | 5 | 3 |
| 4 | 1 | 5 | 4 |
| 4 | 1 | 5 | 3 |
| 5 | 1 | 4 | 3 |
| 5 | 1 | 4 | 5 |
| 4 | 1 | 4 | 5 |
| 4 | 1 | 5 | 4 |
| 4 | 1 | 5 | 3 |
| 5 | 1 | 4 | 4 |
| 4 | 1 | 5 | 5 |
| 5 | 1 | 5 | 5 |
| 5 | 1 | 4 | 4 |
| 3 | 3 | 5 | 5 |
| 3 | 1 | 4 | 4 |
| 5 | 1 | 4 | 4 |
| 5 | 1 | 5 | 5 |
| 5 | 1 | 5 | 5 |
| 5 | 1 | 3 | 5 |
| 3 | 1 | 5 | 3 |
| 4 | 1 | 4 | 3 |
| 4 | 1 | 5 | 5 |
| 4 | 1 | 5 | 4 |
| 4 | 2 | 3 | 4 |
| 4 | 2 | 3 | 4 |
| 4 | 1 | 5 | 2 |
| 4 | 1 | 5 | 4 |
| 4 | 3 | 3 | 1 |
| 4 | 1 | 4 | 3 |
| 4 | 3 | 5 | 4 |
| 3 | 2 | 5 | 2 |
| 5 | 5 | 5 | 5 |
| 4 | 1 | 5 | 5 |
| 5 | 1 | 5 | 5 |
| 4 | 5 | 4 | 2 |

|    |     |     |    |
|----|-----|-----|----|
| 5  | 1   | 5   | 5  |
| 4  | 1   | 5   | 5  |
| 4  | 1   | 5   | 5  |
| 5  | 2   | 5   | 5  |
| 3  | 1   | 5   | 4  |
| 4  | 1   | 5   | 5  |
| 5  | 1   | 5   | 4  |
| 3  | 1   | 5   | 1  |
| 4  | 1   | 5   | 3  |
| 4  | 1   | 5   | 4  |
| 4  | 1   | 5   | 5  |
| 5  | 1   | 5   | 5  |
|    |     |     |    |
| 4  | 168 | 3   | 28 |
| 9  | 15  | 2   | 28 |
| 47 | 12  | 24  | 38 |
| 77 | 4   | 58  | 50 |
| 66 | 4   | 116 | 59 |

\_\_\_\_\_

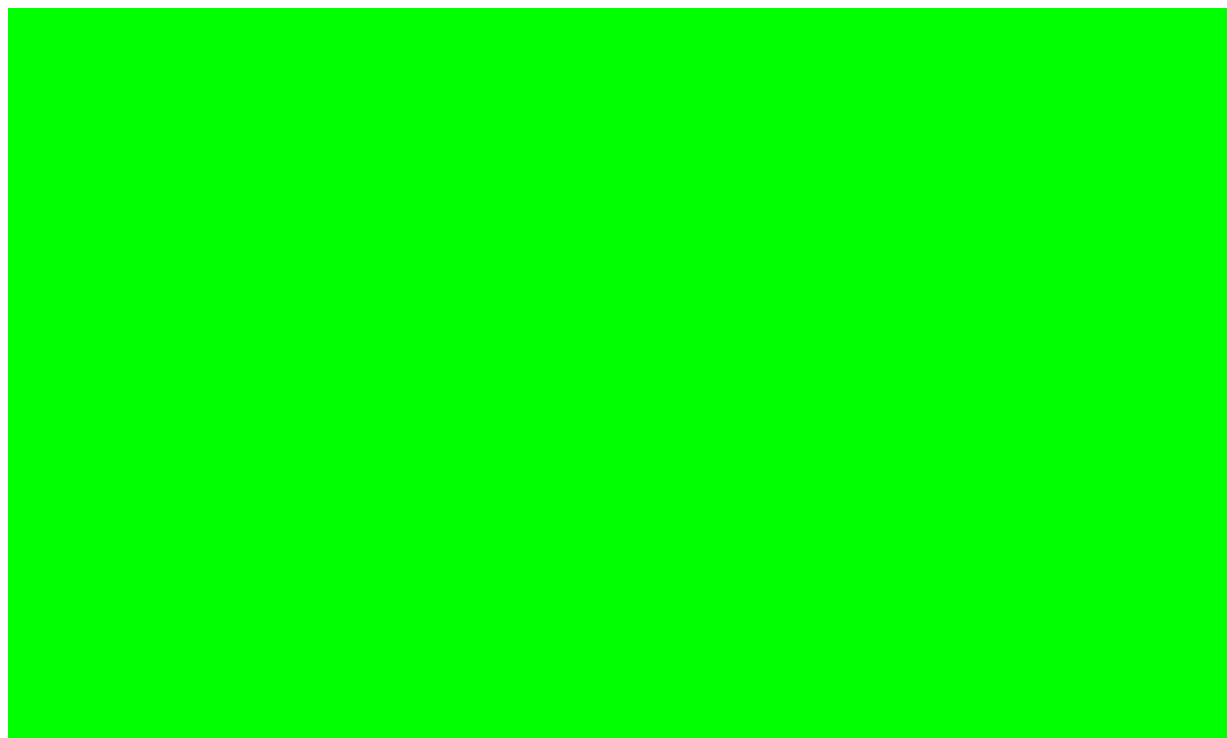

| Other, please specify  | What would be a good | What would be a good | What would be a good |
|------------------------|----------------------|----------------------|----------------------|
|                        | 3                    | 3                    | 4                    |
| Work environments, a   | 1                    | 2                    | 2                    |
|                        | 4                    | 4                    | 4                    |
|                        | 3                    | 1                    | 2                    |
|                        | 3                    | 4                    | 3                    |
|                        | 3                    | 3                    | 3                    |
|                        | 5                    | 2                    | 4                    |
|                        | 4                    | 4                    | 4                    |
|                        | 2                    | 1                    | 5                    |
|                        | 2                    | 2                    | 3                    |
|                        | 2                    | 3                    | 2                    |
|                        | 5                    | 5                    | 5                    |
|                        | 4                    | 4                    | 4                    |
|                        | 4                    | 4                    | 5                    |
|                        | 5                    | 5                    | 5                    |
|                        | 3                    | 4                    | 4                    |
|                        | 3                    | 4                    | 4                    |
|                        | 5                    | 5                    | 5                    |
|                        | 5                    | 5                    | 5                    |
|                        | 5                    | 5                    | 5                    |
|                        | 1                    | 1                    | 5                    |
|                        | 3                    | 4                    | 4                    |
|                        | 3                    | 3                    | 5                    |
|                        | 2                    | 5                    | 4                    |
|                        | 5                    | 5                    | 5                    |
|                        | 3                    | 3                    | 5                    |
|                        | 4                    | 4                    | 5                    |
|                        | 3                    | 3                    | 5                    |
|                        | 5                    | 5                    | 3                    |
|                        | 3                    | 2                    | 5                    |
|                        | 2                    | 5                    | 2                    |
|                        | 3                    | 3                    | 5                    |
|                        | 4                    | 4                    | 4                    |
|                        | 3                    | 3                    | 4                    |
|                        | 4                    | 4                    | 5                    |
|                        | 4                    | 4                    | 4                    |
|                        | 2                    | 2                    | 2                    |
| Education from a young | 4                    | 5                    | 5                    |
|                        | 2                    | 2                    | 2                    |
|                        | 4                    | 4                    | 4                    |
|                        | 2                    | 3                    | 3                    |
|                        | 3                    | 5                    | 5                    |
|                        | 4                    | 3                    | 5                    |
|                        | 4                    | 2                    | 4                    |
|                        | 1                    | 1                    | 5                    |
|                        | 3                    | 2                    | 2                    |
|                        | 4                    | 4                    | 4                    |

|                           |   |   |   |
|---------------------------|---|---|---|
|                           | 3 | 3 | 3 |
|                           | 3 | 4 | 4 |
|                           | 3 | 3 | 4 |
|                           | 4 | 4 | 4 |
|                           | 4 | 4 | 5 |
|                           | 2 | 5 | 1 |
|                           | 3 | 3 | 4 |
|                           | 4 | 4 | 4 |
|                           | 2 | 2 | 4 |
|                           | 2 | 2 | 5 |
|                           | 5 | 5 | 5 |
|                           | 5 | 5 | 5 |
|                           | 4 | 2 | 5 |
|                           | 5 | 5 | 5 |
|                           | 2 | 2 | 4 |
|                           | 3 | 4 | 4 |
|                           | 1 | 2 | 4 |
|                           | 5 | 5 | 5 |
|                           | 4 | 2 | 4 |
| In space whom have m      | 2 | 2 | 3 |
|                           | 4 | 4 | 2 |
|                           | 5 | 5 | 5 |
|                           | 2 | 4 | 5 |
|                           | 4 | 3 | 4 |
|                           | 2 | 2 | 2 |
|                           | 4 | 4 | 4 |
|                           | 3 | 3 | 3 |
|                           | 3 | 3 | 3 |
| Companies!!!!             | 3 | 3 | 3 |
| Companies!!!!             | 3 | 3 | 3 |
|                           | 4 | 4 | 4 |
|                           | 3 | 4 | 1 |
|                           | 4 | 4 | 4 |
|                           | 5 | 5 | 5 |
|                           | 5 | 5 | 5 |
|                           | 1 | 1 | 2 |
|                           | 2 | 3 | 5 |
|                           | 4 | 4 | 4 |
|                           | 2 | 2 | 2 |
|                           | 5 | 5 | 5 |
|                           | 4 | 4 | 4 |
|                           | 3 | 3 | 4 |
| recognized athletes, en   | 5 | 5 | 4 |
|                           | 3 | 3 | 3 |
|                           | 3 | 3 | 4 |
|                           | 2 | 4 | 4 |
|                           | 2 | 2 | 4 |
| retirees who are still kn | 4 | 2 | 4 |

Climatologist

Celebreties & stars

|  |   |   |   |
|--|---|---|---|
|  | 2 | 1 | 4 |
|  | 4 | 5 | 3 |
|  | 2 | 2 | 5 |
|  | 4 | 5 | 5 |
|  | 3 | 2 | 4 |
|  | 4 | 3 | 4 |
|  | 4 | 4 | 4 |
|  | 3 | 4 | 4 |
|  | 4 | 4 | 5 |
|  | 4 | 3 | 4 |
|  | 1 | 1 | 4 |
|  | 5 | 5 | 5 |
|  | 4 | 4 | 4 |
|  | 4 | 4 | 4 |
|  | 4 | 4 | 5 |
|  | 5 | 4 | 5 |
|  | 5 | 5 | 5 |
|  | 3 | 2 | 2 |
|  | 2 | 2 | 3 |
|  | 5 | 5 | 5 |
|  | 4 | 3 | 4 |
|  | 5 | 5 | 5 |
|  | 5 | 5 | 5 |
|  | 4 | 1 | 1 |
|  | 5 | 5 | 5 |
|  | 4 | 4 | 4 |
|  | 1 | 1 | 1 |
|  | 5 | 4 | 5 |
|  | 4 | 4 | 1 |
|  | 2 | 2 | 4 |
|  | 1 | 1 | 5 |
|  | 1 | 1 | 5 |
|  | 4 | 1 | 4 |
|  | 5 | 5 | 5 |
|  | 2 | 2 | 4 |
|  | 2 | 3 | 4 |
|  | 1 | 4 | 4 |
|  | 5 | 5 | 5 |
|  | 4 | 3 | 5 |
|  | 2 | 2 | 4 |
|  | 1 | 1 | 1 |
|  | 4 | 5 | 5 |
|  | 2 | 2 | 5 |
|  | 4 | 4 | 4 |
|  | 3 | 1 | 4 |
|  | 3 | 3 | 3 |
|  | 5 | 5 | 5 |
|  | 3 | 2 | 4 |



|                          |   |   |   |
|--------------------------|---|---|---|
|                          | 4 | 4 | 5 |
|                          | 5 | 5 | 5 |
|                          | 2 | 4 | 5 |
|                          | 5 | 5 | 5 |
|                          | 5 | 5 | 5 |
|                          | 3 | 2 | 4 |
|                          | 1 | 1 | 4 |
|                          | 2 | 4 | 4 |
|                          | 5 | 5 | 5 |
|                          | 5 | 4 | 5 |
|                          | 2 | 2 | 2 |
|                          | 4 | 5 | 4 |
|                          | 3 | 3 | 5 |
|                          | 4 | 2 | 5 |
|                          | 5 | 5 | 5 |
|                          | 1 | 1 | 5 |
|                          | 1 | 1 | 3 |
|                          | 3 | 3 | 4 |
|                          | 4 | 4 | 4 |
| Es un tema transversal   | 5 | 5 | 5 |
|                          | 5 | 5 | 5 |
|                          | 4 | 2 | 4 |
| n/a                      | 3 | 3 | 4 |
|                          | 3 | 3 | 5 |
|                          | 5 | 4 | 5 |
|                          | 5 | 5 | 5 |
|                          | 4 | 4 | 5 |
|                          | 4 | 2 | 4 |
|                          | 3 | 4 | 4 |
|                          | 4 | 4 | 5 |
|                          | 4 | 4 | 4 |
|                          | 5 | 5 | 4 |
|                          | 5 | 5 | 5 |
|                          | 4 | 4 | 4 |
|                          | 3 | 3 | 3 |
|                          | 1 | 1 | 3 |
| Doctors. They talk about | 4 | 4 | 5 |
| Doctors. They talk about | 4 | 4 | 5 |
|                          | 1 | 1 | 2 |
|                          | 4 | 4 | 5 |
|                          | 3 | 4 | 4 |
|                          | 4 | 3 | 5 |
|                          | 4 | 4 | 4 |
| When politicians spread  | 2 | 2 | 3 |
|                          | 5 | 5 | 5 |
|                          | 5 | 5 | 5 |
|                          | 5 | 5 | 5 |
|                          | 5 | 5 | 5 |

|                           |    |    |    |
|---------------------------|----|----|----|
|                           | 5  | 5  | 5  |
|                           | 3  | 2  | 4  |
|                           | 5  | 5  | 5  |
| The increase in hurricane | 5  | 4  | 5  |
|                           | 4  | 3  | 4  |
|                           | 4  | 3  | 3  |
|                           | 5  | 5  | 5  |
|                           | 5  | 5  | 5  |
| campañas con famosos      | 4  | 3  | 5  |
|                           | 3  | 1  | 4  |
|                           | 5  | 5  | 4  |
|                           | 5  | 5  | 5  |
|                           | 16 | 20 | 6  |
|                           | 31 | 35 | 14 |
|                           | 44 | 37 | 20 |
|                           | 61 | 57 | 76 |
|                           | 51 | 54 | 87 |

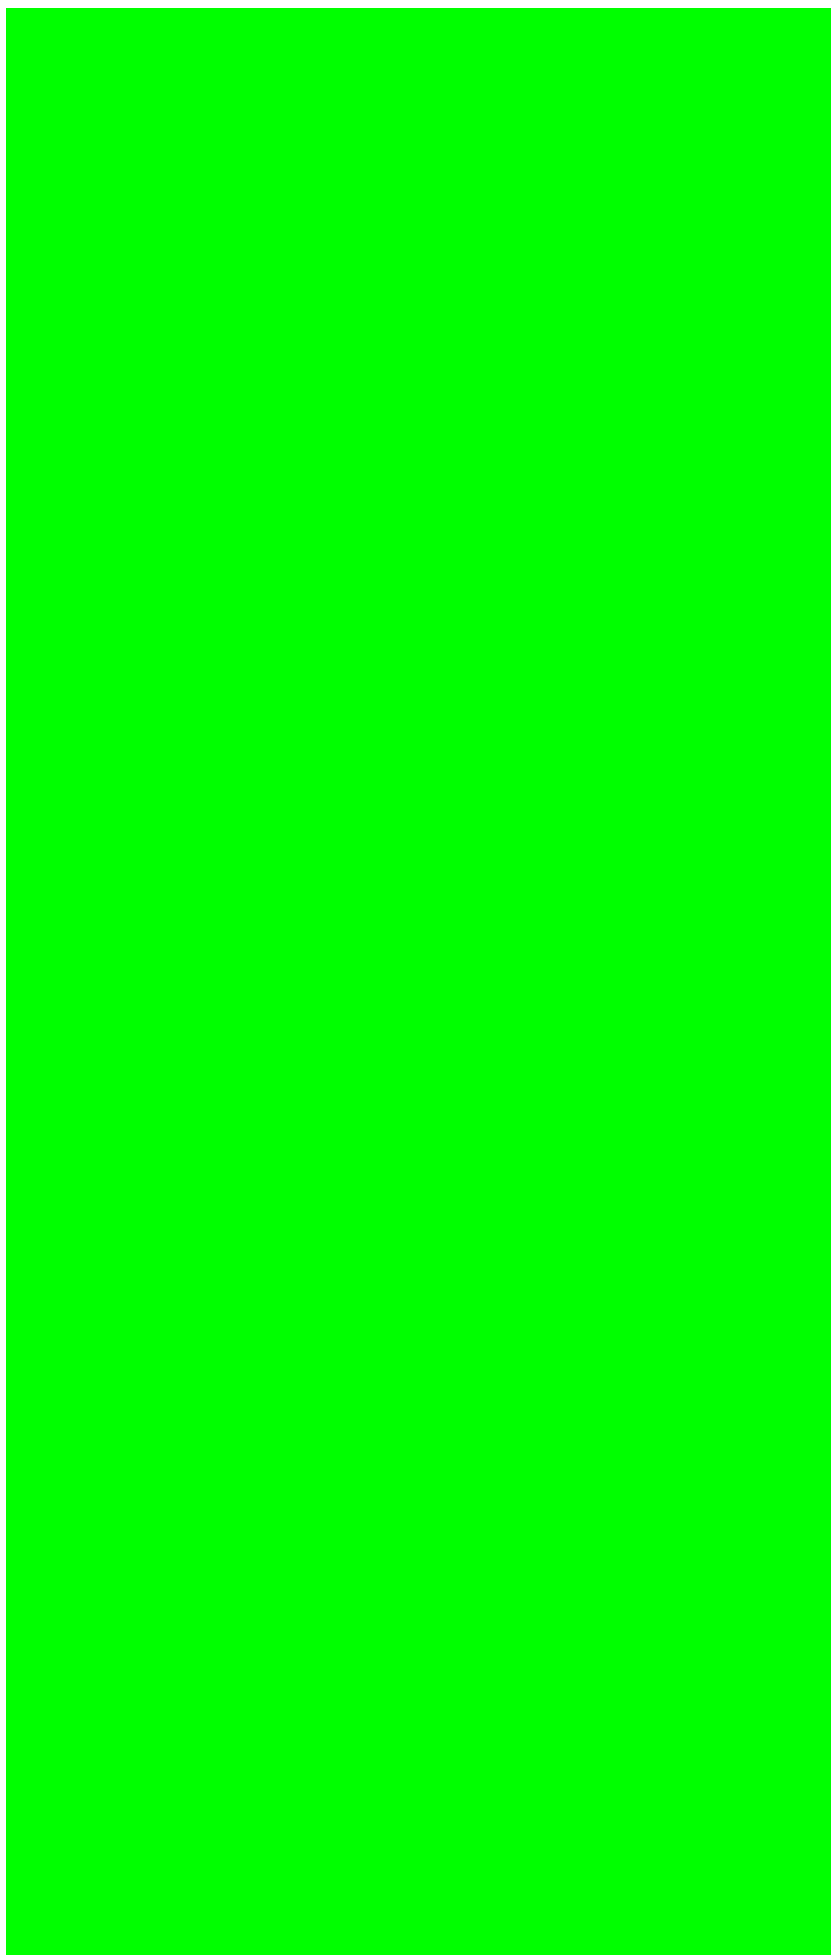

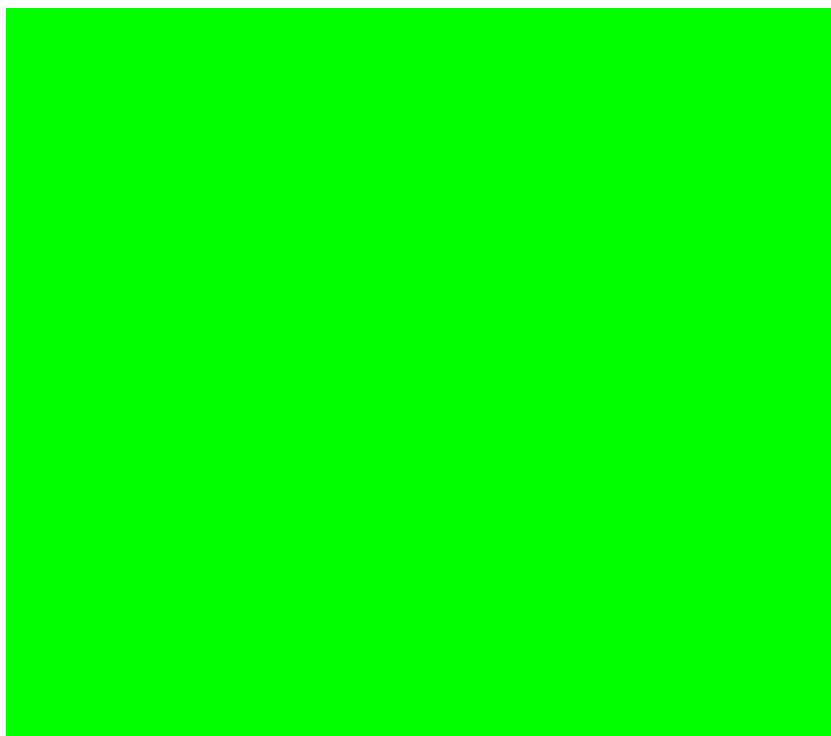

| What would be a good |
|----------------------|----------------------|----------------------|----------------------|
| 5                    | 5                    | 5                    | 4                    |
| 4                    | 5                    | 5                    | 1                    |
| 4                    | 5                    | 3                    | 5                    |
| 1                    | 1                    | 1                    | 2                    |
| 4                    | 4                    | 4                    | 2                    |
| 4                    | 5                    | 4                    | 2                    |
| 4                    | 5                    | 4                    | 1                    |
| 3                    | 3                    | 2                    | 2                    |
| 4                    | 5                    | 4                    | 3                    |
| 3                    | 3                    | 3                    | 3                    |
| 4                    | 4                    | 3                    | 4                    |
| 5                    | 5                    | 5                    | 3                    |
| 4                    | 4                    | 3                    | 2                    |
| 4                    | 4                    | 5                    | 5                    |
| 2                    | 4                    | 4                    | 2                    |
| 4                    | 4                    | 4                    | 2                    |
| 5                    | 5                    | 5                    | 2                    |
| 5                    | 5                    | 5                    | 5                    |
| 5                    | 5                    | 5                    | 5                    |
| 5                    | 5                    | 5                    | 3                    |
| 5                    | 5                    | 5                    | 1                    |
| 5                    | 5                    | 4                    | 4                    |
| 5                    | 3                    | 3                    | 3                    |
| 5                    | 5                    | 3                    | 3                    |
| 5                    | 5                    | 5                    | 2                    |
| 5                    | 5                    | 5                    | 3                    |
| 5                    | 4                    | 4                    | 4                    |
| 5                    | 4                    | 4                    | 3                    |
| 5                    | 5                    | 3                    | 3                    |
| 5                    | 5                    | 4                    | 3                    |
| 5                    | 5                    | 5                    | 2                    |
| 5                    | 5                    | 4                    | 4                    |
| 4                    | 5                    | 3                    | 5                    |
| 5                    | 5                    | 1                    | 4                    |
| 5                    | 5                    | 4                    | 4                    |
| 5                    | 5                    | 5                    | 3                    |
| 1                    | 1                    | 1                    | 2                    |
| 5                    | 4                    | 4                    | 1                    |
| 4                    | 4                    | 4                    | 3                    |
| 4                    | 4                    | 4                    | 5                    |
| 5                    | 5                    | 3                    | 4                    |
| 4                    | 5                    | 5                    | 4                    |
| 5                    | 5                    | 5                    | 4                    |
| 5                    | 5                    | 5                    | 2                    |
| 5                    | 5                    | 3                    | 1                    |
| 5                    | 3                    | 4                    | 3                    |
| 4                    | 4                    | 4                    | 3                    |

|   |   |   |   |
|---|---|---|---|
| 5 | 5 | 5 | 5 |
| 2 | 3 | 3 | 4 |
| 4 | 4 | 4 | 3 |
| 4 | 4 | 4 | 3 |
| 5 | 5 | 5 | 4 |
| 5 | 5 | 4 | 4 |
| 4 | 5 | 3 | 4 |
| 4 | 4 | 4 | 4 |
| 4 | 4 | 4 | 3 |
| 4 | 4 | 5 | 3 |
| 5 | 5 | 4 | 5 |
| 5 | 5 | 4 | 5 |
| 5 | 5 | 3 | 3 |
| 5 | 5 | 5 | 5 |
| 4 | 4 | 4 | 2 |
| 5 | 4 | 3 | 4 |
| 5 | 5 | 3 | 1 |
| 5 | 5 | 4 | 4 |
| 5 | 5 | 5 | 3 |
| 4 | 5 | 4 | 4 |
| 2 | 4 | 5 | 4 |
| 5 | 5 | 5 | 5 |
| 4 | 5 | 3 | 4 |
| 5 | 5 | 5 | 3 |
| 5 | 5 | 4 | 4 |
| 4 | 4 | 4 | 2 |
| 3 | 4 | 3 | 3 |
| 5 | 4 | 5 | 4 |
| 5 | 5 | 5 | 5 |
| 5 | 5 | 5 | 5 |
| 3 | 4 | 5 | 2 |
| 3 | 4 | 4 | 3 |
| 5 | 5 | 4 | 4 |
| 5 | 5 | 5 | 3 |
| 5 | 5 | 5 | 3 |
| 5 | 4 | 2 | 1 |
| 5 | 5 | 4 | 2 |
| 5 | 5 | 5 | 2 |
| 4 | 4 | 3 | 2 |
| 5 | 4 | 4 | 4 |
| 5 | 5 | 4 | 2 |
| 5 | 5 | 3 | 2 |
| 4 | 4 | 4 | 5 |
| 5 | 5 | 5 | 4 |
| 4 | 5 | 3 | 3 |
| 5 | 3 | 5 | 4 |
| 5 | 5 | 4 | 2 |
| 5 | 5 | 4 | 3 |

|   |   |   |   |
|---|---|---|---|
| 4 | 5 | 2 | 5 |
| 4 | 5 | 5 | 4 |
| 5 | 5 | 5 | 4 |
| 4 | 4 | 5 | 3 |
| 5 | 5 | 4 | 4 |
| 3 | 4 | 4 | 4 |
| 4 | 4 | 4 | 3 |
| 4 | 4 | 4 | 4 |
| 5 | 5 | 5 | 4 |
| 5 | 5 | 3 | 2 |
| 5 | 5 | 5 | 1 |
| 5 | 5 | 5 | 3 |
| 4 | 4 | 4 | 4 |
| 4 | 4 | 4 | 4 |
| 4 | 4 | 4 | 4 |
| 5 | 3 | 4 | 3 |
| 5 | 5 | 5 | 3 |
| 5 | 5 | 5 | 3 |
| 4 | 5 | 3 | 3 |
| 5 | 5 | 5 | 5 |
| 4 | 5 | 2 | 4 |
| 5 | 5 | 5 | 4 |
| 5 | 5 | 5 | 5 |
| 4 | 4 | 1 | 4 |
| 5 | 5 | 3 | 3 |
| 4 | 4 | 4 | 4 |
| 5 | 5 | 1 | 5 |
| 4 | 5 | 5 | 4 |
| 5 | 5 | 4 | 2 |
| 4 | 3 | 3 | 4 |
| 5 | 5 | 4 | 3 |
| 5 | 5 | 4 | 1 |
| 4 | 4 | 4 | 1 |
| 5 | 5 | 5 | 4 |
| 5 | 4 | 4 | 3 |
| 4 | 5 | 5 | 2 |
| 5 | 5 | 2 | 1 |
| 5 | 5 | 5 | 3 |
| 5 | 2 | 3 | 2 |
| 5 | 5 | 4 | 1 |
| 5 | 5 | 2 | 1 |
| 3 | 5 | 5 | 3 |
| 5 | 5 | 3 | 2 |
| 4 | 4 | 4 | 4 |
| 4 | 4 | 1 | 2 |
| 5 | 5 | 5 | 3 |
| 5 | 5 | 4 | 3 |
| 5 | 5 | 4 | 1 |

|   |   |   |   |
|---|---|---|---|
| 5 | 5 | 5 | 4 |
| 5 | 5 | 5 | 2 |
| 1 | 4 | 4 | 2 |
| 5 | 5 | 5 | 5 |
| 5 | 5 | 5 | 5 |
| 5 | 5 | 4 | 3 |
| 4 | 5 | 1 | 3 |
| 4 | 4 | 4 | 1 |
| 5 | 5 | 4 | 5 |
| 5 | 5 | 4 | 1 |
| 4 | 4 | 3 | 3 |
| 5 | 4 | 4 | 3 |
| 5 | 5 | 3 | 4 |
| 5 | 5 | 4 | 4 |
| 5 | 5 | 5 | 3 |
| 5 | 5 | 4 | 3 |
| 5 | 5 | 3 | 1 |
| 4 | 4 | 4 | 2 |
| 5 | 5 | 5 | 5 |
| 4 | 4 | 5 | 3 |
| 5 | 5 | 5 | 4 |
| 5 | 5 | 5 | 3 |
| 5 | 5 | 1 | 3 |
| 5 | 5 | 5 | 3 |
| 5 | 5 | 5 | 5 |
| 5 | 5 | 5 | 3 |
| 5 | 5 | 5 | 2 |
| 5 | 5 | 4 | 4 |
| 4 | 4 | 4 | 4 |
| 5 | 5 | 4 | 4 |
| 4 | 4 | 4 | 4 |
| 5 | 5 | 5 | 4 |
| 5 | 5 | 5 | 5 |
| 4 | 4 | 4 | 4 |
| 5 | 5 | 4 | 4 |
| 5 | 5 | 5 | 3 |
| 5 | 5 | 5 | 4 |
| 5 | 5 | 5 | 4 |
| 5 | 5 | 3 | 2 |
| 5 | 4 | 5 | 3 |
| 3 | 4 | 4 | 4 |
| 5 | 4 | 3 | 4 |
| 4 | 5 | 5 | 4 |
| 5 | 5 | 5 | 3 |
| 5 | 5 | 5 | 5 |
| 5 | 5 | 5 | 5 |
| 5 | 5 | 5 | 5 |
| 5 | 5 | 5 | 5 |



|     |     |    |    |
|-----|-----|----|----|
| 5   | 3   | 3  | 5  |
| 5   | 5   | 4  | 3  |
| 5   | 5   | 5  | 3  |
| 5   | 5   | 5  | 5  |
| 5   | 5   | 4  | 2  |
| 2   | 5   | 1  | 1  |
| 5   | 5   | 3  | 3  |
| 5   | 5   | 5  | 3  |
| 4   | 3   | 5  | 3  |
| 4   | 5   | 5  | 3  |
| 5   | 5   | 4  | 5  |
| 5   | 5   | 5  | 5  |
| 3   | 2   | 9  | 18 |
| 4   | 1   | 6  | 33 |
| 8   | 10  | 33 | 61 |
| 57  | 54  | 74 | 59 |
| 131 | 136 | 81 | 32 |





| What would be a good indicator of climate change? | What would be a good indicator of climate change? | Other, please specify    | What would be the most important indicator of climate change? |
|---------------------------------------------------|---------------------------------------------------|--------------------------|---------------------------------------------------------------|
| 4                                                 | 1                                                 |                          | 5                                                             |
| 2                                                 | 1                                                 | Extended growing seasons | 4                                                             |
| 3                                                 | 5                                                 |                          | 1                                                             |
| 1                                                 | 5                                                 |                          | 1                                                             |
| 4                                                 | 1                                                 |                          | 2                                                             |
| 2                                                 | 1                                                 |                          | 3                                                             |
| 4                                                 | 1                                                 |                          | 4                                                             |
| 3                                                 | 1                                                 |                          | 4                                                             |
| 3                                                 | 1                                                 |                          | 2                                                             |
| 3                                                 | 1                                                 |                          | 1                                                             |
| 3                                                 | 1                                                 |                          | 1                                                             |
| 5                                                 | 1                                                 |                          | 5                                                             |
| 4                                                 | 1                                                 |                          | 4                                                             |
| 4                                                 | 1                                                 |                          | 4                                                             |
| 5                                                 | 1                                                 |                          | 5                                                             |
| 4                                                 | 1                                                 |                          | 5                                                             |
| 5                                                 | 1                                                 |                          | 4                                                             |
| 5                                                 | 2                                                 |                          | 5                                                             |
| 5                                                 | 2                                                 |                          | 5                                                             |
| 5                                                 | 1                                                 |                          | 3                                                             |
| 5                                                 | 1                                                 |                          | 1                                                             |
| 5                                                 | 1                                                 |                          | 5                                                             |
| 3                                                 | 1                                                 |                          | 5                                                             |
| 5                                                 | 1                                                 |                          | 4                                                             |
| 5                                                 | 1                                                 |                          | 5                                                             |
| 3                                                 | 1                                                 |                          | 5                                                             |
| 3                                                 | 1                                                 |                          | 4                                                             |
| 3                                                 | 1                                                 |                          | 3                                                             |
| 5                                                 | 1                                                 |                          | 1                                                             |
| 2                                                 | 1                                                 |                          | 5                                                             |
| 5                                                 | 1                                                 |                          | 5                                                             |
| 3                                                 | 1                                                 |                          | 5                                                             |
| 4                                                 | 1                                                 |                          | 4                                                             |
| 5                                                 | 1                                                 |                          | 4                                                             |
| 4                                                 | 1                                                 |                          | 5                                                             |
| 4                                                 | 1                                                 |                          | 4                                                             |
| 1                                                 | 2                                                 |                          | 1                                                             |
| 4                                                 | 1                                                 |                          | 2                                                             |
| 3                                                 | 1                                                 |                          | 3                                                             |
| 4                                                 | 2                                                 |                          | 4                                                             |
| 4                                                 | 1                                                 |                          | 5                                                             |
| 5                                                 | 5                                                 |                          | 5                                                             |
| 4                                                 | 1                                                 |                          | 5                                                             |
| 3                                                 | 1                                                 |                          | 4                                                             |
| 5                                                 | 1                                                 |                          | 5                                                             |
| 4                                                 | 1                                                 |                          | 4                                                             |
| 4                                                 | 1                                                 |                          | 3                                                             |

|   |                            |   |
|---|----------------------------|---|
| 4 | 1                          | 3 |
| 5 | 1                          | 3 |
| 3 | 3                          | 4 |
| 4 | 1                          | 4 |
| 5 | 1                          | 5 |
| 5 | 1                          | 5 |
| 5 | 1                          | 4 |
| 4 | 1                          | 2 |
| 2 | 1                          | 4 |
| 2 | 1                          | 5 |
| 5 | 4                          | 4 |
| 5 | 4                          | 4 |
| 3 | 1                          | 3 |
| 5 | 1                          | 5 |
| 5 | 1                          | 4 |
| 5 | 5                          | 4 |
| 2 | 1                          | 5 |
| 3 | 1                          | 3 |
| 3 | 1                          | 2 |
| 1 | 1 Increase in average of   | 5 |
| 4 | 1                          | 3 |
| 5 | 1                          | 5 |
| 3 | 1                          | 4 |
| 3 | 1                          | 4 |
| 2 | 1                          | 4 |
| 3 | 1                          | 4 |
| 4 | 1                          | 4 |
| 4 | 1                          | 2 |
| 3 | 2 Disaster                 | 5 |
| 3 | 2 Disaster                 | 5 |
| 3 | 1                          | 4 |
| 4 | 1                          | 3 |
| 4 | 1                          | 4 |
| 5 | 1                          | 5 |
| 5 | 1 Increase in extreme pre  | 5 |
| 1 | 1                          | 1 |
| 2 | 1                          | 4 |
| 5 | 1                          | 4 |
| 3 | 1 Note the ones I agreed   | 2 |
| 5 | 1                          | 4 |
| 3 | 1                          | 5 |
| 5 | 1                          | 5 |
| 5 | 1 relationship between th  | 4 |
| 4 | 1                          | 4 |
| 3 | 2                          | 4 |
| 4 | 1                          | 3 |
| 2 | 1                          | 4 |
| 3 | 1 "Pollution" does not nec | 3 |

|   |   |
|---|---|
| 3 | 1 |
| 5 | 1 |
| 4 | 1 |
| 5 | 1 |
| 2 | 1 |
| 3 | 1 |
| 3 | 1 |
| 4 | 1 |
| 4 | 1 |
| 2 | 1 |
| 2 | 1 |
| 5 | 1 |
| 4 | 1 |
| 4 | 2 |
| 4 | 1 |
| 3 | 1 |
| 5 | 1 |
| 2 | 1 |
| 4 | 2 |
| 5 | 1 |
| 3 | 1 |
| 5 | 1 |
| 5 | 1 |
| 3 | 1 |
| 5 | 1 |
| 4 | 2 |
| 5 | 1 |
| 4 | 1 |
| 3 | 1 |
| 3 | 1 |
| 1 | 1 |
| 5 | 1 |
| 1 | 1 |
| 5 | 1 |
| 2 | 1 |
| 4 | 1 |
| 1 | 1 |
| 5 | 1 |
| 4 | 1 |
| 4 | 1 |
| 3 | 1 |
| 5 | 1 |
| 3 | 1 |
| 4 | 1 |
| 1 | 1 |
| 3 | 1 |
| 5 | 1 |
| 4 | 1 |

|   |
|---|
| 5 |
| 4 |
| 2 |
| 4 |
| 5 |
| 3 |
| 4 |
| 4 |
| 4 |
| 4 |
| 5 |
| 5 |
| 4 |
| 5 |
| 4 |
| 3 |
| 5 |
| 4 |
| 5 |
| 4 |
| 1 |
| 4 |
| 3 |
| 4 |
| 4 |
| 3 |
| 5 |
| 5 |
| 5 |
| 5 |
| 5 |
| 2 |
| 2 |
| 5 |
| 5 |
| 5 |
| 3 |
| 4 |
| 5 |
| 2 |
| 3 |
| 5 |
| 4 |
| 5 |
| 5 |

|  |   |   |                           |   |
|--|---|---|---------------------------|---|
|  | 4 | 1 |                           | 3 |
|  | 5 | 1 |                           | 5 |
|  | 4 | 1 |                           | 4 |
|  | 5 | 1 |                           | 5 |
|  | 5 | 1 |                           | 5 |
|  | 2 | 1 |                           | 5 |
|  | 4 | 1 |                           | 1 |
|  | 4 | 1 |                           | 4 |
|  | 5 | 1 | more frequent extreme     | 5 |
|  | 4 | 1 |                           | 5 |
|  | 2 | 1 |                           | 3 |
|  | 5 | 1 |                           | 2 |
|  | 3 | 3 |                           | 5 |
|  | 5 | 1 |                           | 5 |
|  | 5 | 1 |                           | 3 |
|  | 3 | 1 |                           | 5 |
|  | 1 | 1 |                           | 5 |
|  | 4 | 1 | health, food supply, sec  | 4 |
|  | 4 | 1 |                           | 4 |
|  | 4 | 1 | Salud                     | 5 |
|  | 5 | 1 |                           | 5 |
|  | 2 | 1 |                           | 5 |
|  | 3 | 1 | n/a                       | 5 |
|  | 3 | 1 |                           | 5 |
|  | 4 | 1 |                           | 5 |
|  | 5 | 1 |                           | 4 |
|  | 4 | 1 |                           | 5 |
|  | 4 | 1 |                           | 5 |
|  | 4 | 1 |                           | 4 |
|  | 4 | 1 |                           | 5 |
|  | 4 | 1 |                           | 5 |
|  | 5 | 1 |                           | 5 |
|  | 5 | 1 |                           | 4 |
|  | 4 | 1 |                           | 4 |
|  | 3 | 1 |                           | 3 |
|  | 5 | 1 |                           | 5 |
|  | 3 | 1 | Health, viruses, dieing t | 5 |
|  | 3 | 1 | Health, viruses, dieing t | 5 |
|  | 2 | 1 |                           | 5 |
|  | 5 | 1 |                           | 5 |
|  | 4 | 1 |                           | 4 |
|  | 5 | 1 | Severe weather pattern    | 4 |
|  | 4 | 1 |                           | 5 |
|  | 5 | 1 |                           | 4 |
|  | 5 | 5 |                           | 4 |
|  | 5 | 1 |                           | 5 |
|  | 5 | 5 |                           | 5 |
|  | 5 | 1 |                           | 5 |





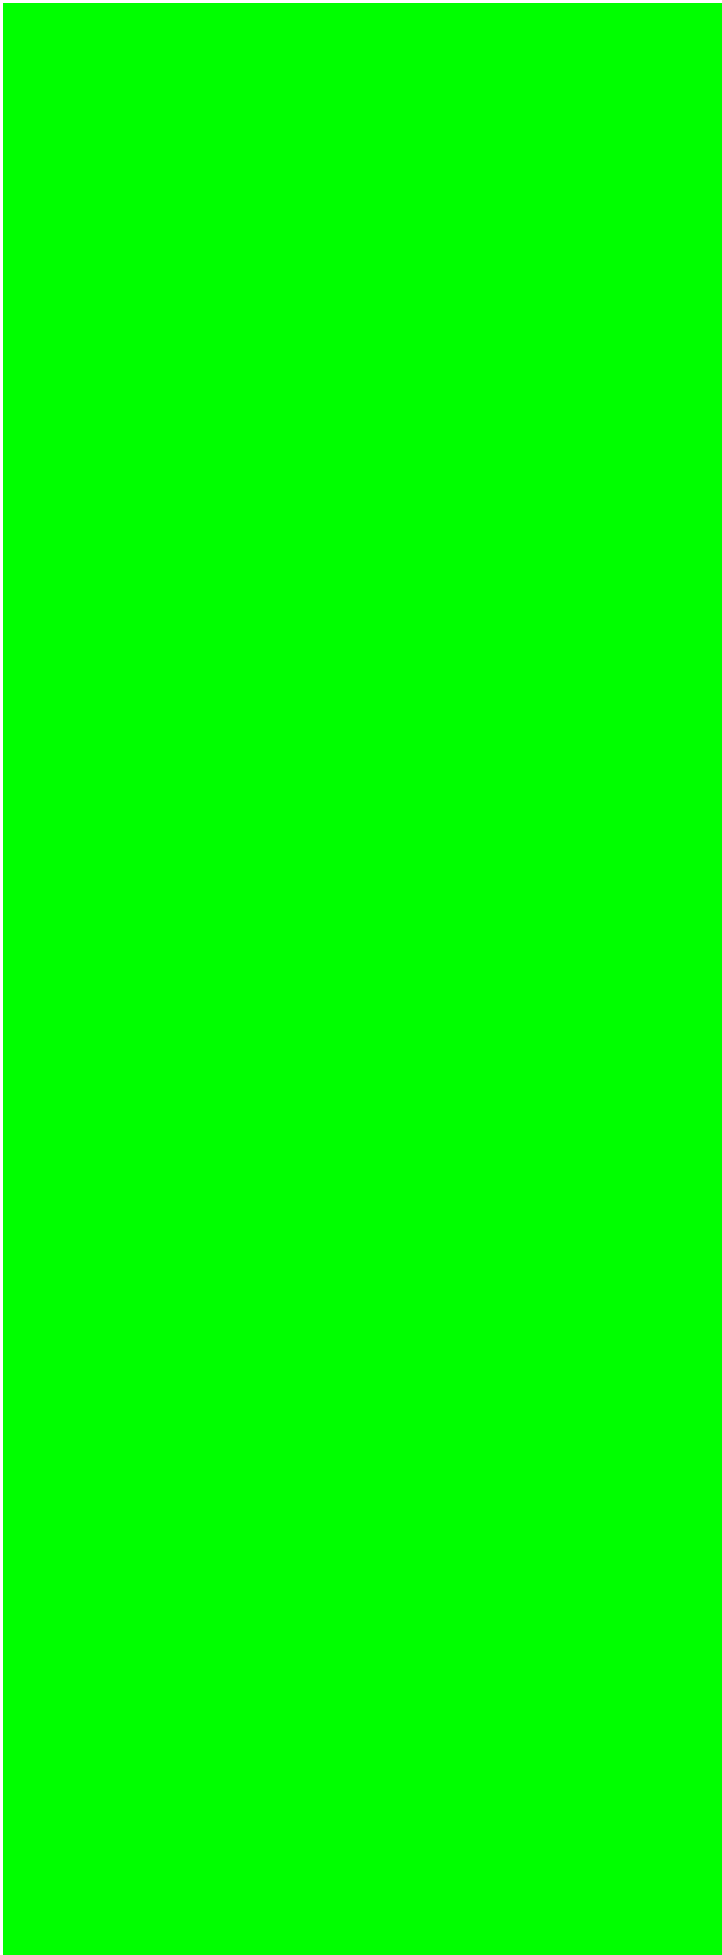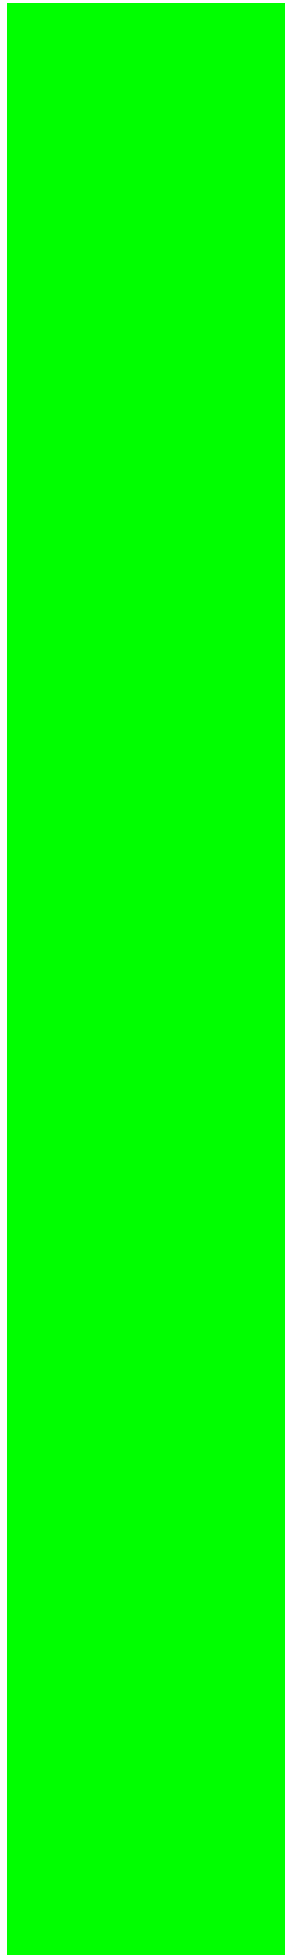

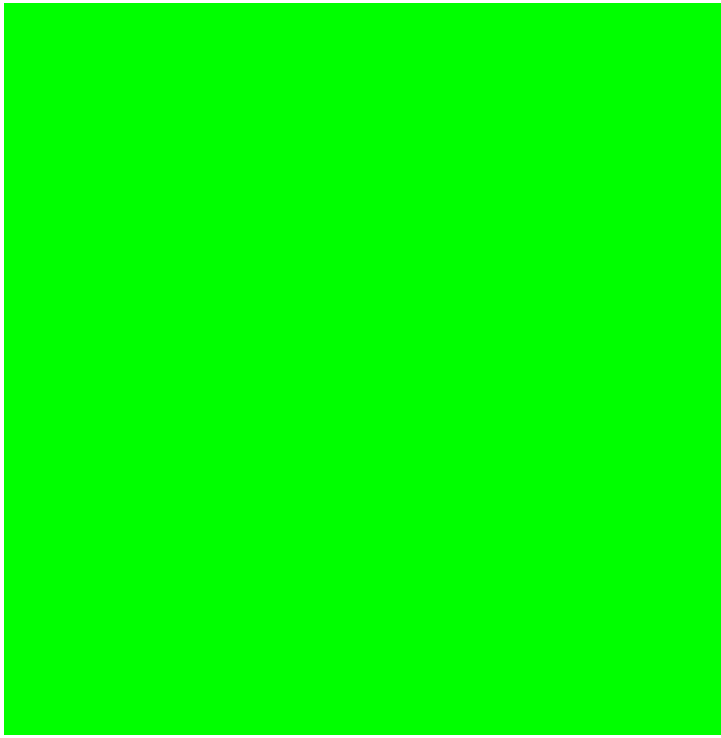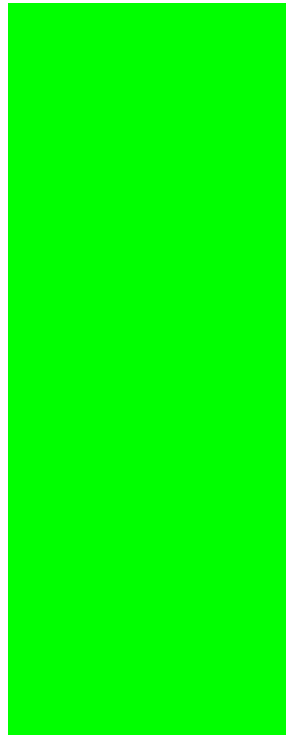

|                                         |                                         |                                         |                                         |
|-----------------------------------------|-----------------------------------------|-----------------------------------------|-----------------------------------------|
| What would be the most likely response? |
| 4                                       | 2                                       | 2                                       | 5                                       |
| 2                                       | 1                                       | 1                                       | 3                                       |
| 1                                       | 1                                       | 3                                       | 3                                       |
| 2                                       | 2                                       | 5                                       | 4                                       |
| 2                                       | 3                                       | 4                                       | 4                                       |
| 4                                       | 3                                       | 3                                       | 5                                       |
| 4                                       | 1                                       | 2                                       | 5                                       |
| 3                                       | 1                                       | 4                                       | 3                                       |
| 3                                       | 2                                       | 2                                       | 4                                       |
| 1                                       | 1                                       | 3                                       | 3                                       |
| 2                                       | 2                                       | 2                                       | 2                                       |
| 5                                       | 5                                       | 5                                       | 5                                       |
| 4                                       | 4                                       | 4                                       | 4                                       |
| 5                                       | 3                                       | 1                                       | 5                                       |
| 4                                       | 1                                       | 5                                       | 5                                       |
| 5                                       | 4                                       | 1                                       | 4                                       |
| 4                                       | 2                                       | 4                                       | 5                                       |
| 4                                       | 1                                       | 5                                       | 5                                       |
| 4                                       | 1                                       | 5                                       | 5                                       |
| 3                                       | 2                                       | 2                                       | 5                                       |
| 1                                       | 1                                       | 5                                       | 5                                       |
| 4                                       | 3                                       | 2                                       | 4                                       |
| 5                                       | 5                                       | 5                                       | 5                                       |
| 5                                       | 3                                       | 1                                       | 4                                       |
| 5                                       | 5                                       | 5                                       | 5                                       |
| 5                                       | 5                                       | 5                                       | 5                                       |
| 3                                       | 2                                       | 2                                       | 4                                       |
| 5                                       | 3                                       | 2                                       | 4                                       |
| 1                                       | 1                                       | 5                                       | 5                                       |
| 5                                       | 3                                       | 4                                       | 5                                       |
| 4                                       | 3                                       | 4                                       | 4                                       |
| 5                                       | 5                                       | 5                                       | 5                                       |
| 4                                       | 4                                       | 3                                       | 3                                       |
| 4                                       | 3                                       | 3                                       | 4                                       |
| 5                                       | 5                                       | 5                                       | 5                                       |
| 4                                       | 2                                       | 3                                       | 4                                       |
| 2                                       | 2                                       | 1                                       | 1                                       |
| 4                                       | 1                                       | 4                                       | 5                                       |
| 2                                       | 2                                       | 4                                       | 4                                       |
| 4                                       | 3                                       | 3                                       | 4                                       |
| 3                                       | 2                                       | 3                                       | 4                                       |
| 5                                       | 5                                       | 1                                       | 3                                       |
| 5                                       | 4                                       | 4                                       | 5                                       |
| 2                                       | 1                                       | 4                                       | 5                                       |
| 4                                       | 1                                       | 4                                       | 5                                       |
| 4                                       | 2                                       | 3                                       | 4                                       |
| 4                                       | 3                                       | 4                                       | 4                                       |

|   |   |   |   |
|---|---|---|---|
| 3 | 3 | 2 | 3 |
| 5 | 2 | 2 | 4 |
| 4 | 4 | 4 | 4 |
| 4 | 3 | 4 | 4 |
| 4 | 3 | 2 | 4 |
| 5 | 5 | 5 | 5 |
| 5 | 4 | 2 | 5 |
| 4 | 2 | 2 | 4 |
| 4 | 3 | 3 | 3 |
| 2 | 2 | 5 | 5 |
| 4 | 3 | 3 | 4 |
| 4 | 3 | 3 | 4 |
| 4 | 2 | 2 | 4 |
| 5 | 5 | 5 | 5 |
| 5 | 3 | 5 | 5 |
| 4 | 4 | 3 | 3 |
| 5 | 2 | 2 | 5 |
| 5 | 2 | 1 | 5 |
| 4 | 1 | 2 | 5 |
| 4 | 4 | 4 | 5 |
| 4 | 3 | 3 | 5 |
| 4 | 2 | 5 | 5 |
| 2 | 2 | 4 | 2 |
| 3 | 3 | 3 | 4 |
| 4 | 2 | 4 | 5 |
| 4 | 4 | 3 | 3 |
| 4 | 2 | 4 | 4 |
| 5 | 4 | 2 | 3 |
| 5 | 5 | 4 | 4 |
| 5 | 5 | 4 | 4 |
| 1 | 1 | 4 | 4 |
| 3 | 4 | 4 | 4 |
| 4 | 3 | 4 | 4 |
| 5 | 3 | 1 | 5 |
| 3 | 2 | 2 | 4 |
| 3 | 2 | 3 | 3 |
| 3 | 2 | 4 | 5 |
| 4 | 2 | 3 | 4 |
| 2 | 2 | 2 | 4 |
| 4 | 2 | 4 | 5 |
| 4 | 4 | 2 | 4 |
| 4 | 4 | 3 | 3 |
| 4 | 4 | 4 | 5 |
| 3 | 2 | 5 | 5 |
| 4 | 3 | 3 | 4 |
| 4 | 2 | 3 | 4 |
| 4 | 3 | 5 | 5 |
| 4 | 1 | 1 | 4 |

|   |   |   |   |
|---|---|---|---|
| 5 | 3 | 5 | 5 |
| 5 | 2 | 1 | 4 |
| 2 | 2 | 5 | 5 |
| 4 | 3 | 1 | 2 |
| 5 | 3 | 2 | 5 |
| 4 | 2 | 2 | 3 |
| 3 | 3 | 2 | 4 |
| 3 | 3 | 3 | 4 |
| 4 | 2 | 2 | 5 |
| 3 | 3 | 3 | 5 |
| 4 | 2 | 2 | 4 |
| 5 | 3 | 2 | 4 |
| 4 | 2 | 4 | 4 |
| 5 | 5 | 4 | 2 |
| 4 | 3 | 2 | 5 |
| 5 | 1 | 3 | 5 |
| 5 | 4 | 5 | 5 |
| 5 | 4 | 2 | 4 |
| 5 | 4 | 5 | 5 |
| 4 | 3 | 5 | 5 |
| 4 | 3 | 5 | 5 |
| 5 | 2 | 2 | 4 |
| 5 | 2 | 4 | 5 |
| 4 | 1 | 1 | 3 |
| 3 | 3 | 3 | 4 |
| 3 | 2 | 2 | 4 |
| 5 | 3 | 5 | 5 |
| 3 | 3 | 1 | 4 |
| 3 | 4 | 1 | 4 |
| 5 | 4 | 4 | 4 |
| 4 | 4 | 3 | 5 |
| 5 | 1 | 5 | 5 |
| 5 | 1 | 4 | 1 |
| 4 | 2 | 2 | 4 |
| 3 | 2 | 3 | 5 |
| 4 | 2 | 4 | 4 |
| 5 | 2 | 2 | 5 |
| 5 | 2 | 5 | 1 |
| 3 | 2 | 3 | 4 |
| 5 | 2 | 2 | 5 |
| 5 | 2 | 3 | 4 |
| 5 | 3 | 5 | 5 |
| 4 | 3 | 1 | 4 |
| 3 | 2 | 2 | 4 |
| 4 | 2 | 5 | 4 |
| 3 | 2 | 3 | 4 |
| 5 | 3 | 3 | 5 |
| 5 | 3 | 3 | 5 |

|   |   |   |   |
|---|---|---|---|
| 3 | 3 | 3 | 5 |
| 5 | 5 | 5 | 5 |
| 4 | 3 | 5 | 5 |
| 5 | 5 | 2 | 5 |
| 5 | 5 | 4 | 5 |
| 5 | 4 | 4 | 5 |
| 1 | 1 | 1 | 4 |
| 4 | 1 | 5 | 5 |
| 5 | 4 | 5 | 4 |
| 5 | 3 | 1 | 5 |
| 2 | 1 | 4 | 4 |
| 5 | 1 | 1 | 4 |
| 5 | 5 | 5 | 5 |
| 5 | 4 | 5 | 5 |
| 4 | 2 | 2 | 3 |
| 5 | 5 | 3 | 5 |
| 3 | 1 | 2 | 4 |
| 2 | 1 | 3 | 5 |
| 5 | 4 | 3 | 4 |
| 3 | 2 | 2 | 5 |
| 5 | 4 | 3 | 4 |
| 3 | 2 | 2 | 5 |
| 5 | 5 | 3 | 5 |
| 5 | 3 | 3 | 3 |
| 5 | 3 | 2 | 5 |
| 5 | 2 | 4 | 5 |
| 5 | 3 | 3 | 3 |
| 4 | 2 | 1 | 5 |
| 5 | 4 | 4 | 5 |
| 4 | 3 | 2 | 4 |
| 5 | 5 | 4 | 4 |
| 4 | 4 | 1 | 4 |
| 5 | 2 | 1 | 5 |
| 5 | 4 | 4 | 5 |
| 3 | 3 | 4 | 5 |
| 5 | 3 | 5 | 5 |
| 4 | 1 | 1 | 4 |
| 4 | 1 | 1 | 4 |
| 4 | 4 | 2 | 4 |
| 5 | 1 | 1 | 5 |
| 4 | 5 | 3 | 4 |
| 4 | 4 | 5 | 5 |
| 4 | 3 | 2 | 4 |
| 5 | 3 | 5 | 5 |
| 5 | 4 | 5 | 5 |
| 5 | 5 | 1 | 5 |
| 5 | 5 | 5 | 5 |
| 5 | 5 | 3 | 5 |

|    |    |    |     |
|----|----|----|-----|
| 5  | 5  | 5  | 5   |
| 5  | 4  | 2  | 5   |
| 5  | 3  | 1  | 4   |
| 3  | 2  | 2  | 3   |
| 4  | 1  | 2  | 4   |
| 5  | 4  | 3  | 5   |
| 4  | 4  | 4  | 5   |
| 4  | 3  | 3  | 5   |
| 4  | 5  | 3  | 5   |
| 4  | 2  | 1  | 5   |
| 3  | 1  | 4  | 5   |
| 5  | 4  | 5  | 5   |
| 6  | 31 | 27 | 3   |
| 13 | 58 | 46 | 4   |
| 30 | 54 | 45 | 19  |
| 75 | 35 | 42 | 77  |
| 79 | 25 | 43 | 100 |







What would be the most likely outcome if the government were to increase the tax on cigarettes?

5  
4  
4  
4  
4  
3  
4  
1  
4  
3  
3  
4  
4  
5  
4  
3  
5  
3  
3  
4  
5  
3  
3  
4  
5  
3  
5  
5  
4  
2  
5  
4  
1  
4  
2  
4  
4  
5  
4  
1  
3  
4  
2

1  
1  
2  
2  
1  
4  
1  
2  
1  
4  
3  
1  
3  
2  
2  
3  
1  
4  
5  
3  
4  
2  
2  
1  
2  
2  
4  
1  
2  
2  
2  
2  
2

5  
5  
2  
1  
4  
4  
5  
4  
3  
4  
5  
4  
5  
5  
4  
5  
4  
5  
4  
3  
5  
5  
5  
4  
3  
5  
4  
1  
4  
4  
3  
5  
5  
4  
3  
5

5  
3  
3  
2  
4  
5  
4  
5  
5  
3  
1  
4  
5  
4  
3  
4  
5  
4  
3  
5  
4  
3  
5  
4  
5  
4  
3  
4  
5  
4  
3  
4  
5

|   |   |   |   |
|---|---|---|---|
| 3 | 2 | 3 | 3 |
| 3 | 4 | 4 | 5 |
| 4 | 3 | 4 | 4 |
| 3 | 3 | 4 | 4 |
| 5 | 1 | 5 | 5 |
| 5 | 2 | 5 | 5 |
| 5 | 1 | 5 | 5 |
| 4 | 2 | 4 | 4 |
| 3 | 1 | 3 | 3 |
| 4 | 3 | 4 | 5 |
| 5 | 3 | 4 | 3 |
| 5 | 3 | 4 | 3 |
| 3 | 1 | 5 | 5 |
| 5 | 5 | 5 | 5 |
| 2 | 4 | 5 | 5 |
| 3 | 3 | 4 | 5 |
| 4 | 2 | 5 | 2 |
| 4 | 1 | 4 | 5 |
| 5 | 1 | 5 | 4 |
| 1 | 3 | 2 | 3 |
| 3 | 2 | 5 | 2 |
| 5 | 2 | 5 | 5 |
| 4 | 2 | 5 | 5 |
| 3 | 2 | 5 | 4 |
| 5 | 2 | 4 | 4 |
| 3 | 2 | 3 | 3 |
| 4 | 2 | 4 | 4 |
| 3 | 2 | 5 | 3 |
| 5 | 5 | 5 | 5 |
| 5 | 5 | 5 | 5 |
| 4 | 1 | 4 | 4 |
| 4 | 1 | 3 | 4 |
| 5 | 1 | 5 | 4 |
| 5 | 1 | 5 | 5 |
| 5 | 3 | 5 | 5 |
| 3 | 1 | 4 | 3 |
| 5 | 1 | 5 | 5 |
| 4 | 1 | 4 | 5 |
| 5 | 2 | 5 | 4 |
| 5 | 1 | 5 | 4 |
| 2 | 2 | 5 | 3 |
| 4 | 2 | 4 | 4 |
| 5 | 2 | 5 | 5 |
| 3 | 3 | 4 | 4 |
| 4 | 3 | 3 | 4 |
| 5 | 2 | 5 | 4 |
| 5 | 2 | 4 | 4 |
| 4 | 1 | 5 | 4 |

|   |   |   |   |
|---|---|---|---|
| 5 | 1 | 4 | 4 |
| 5 | 2 | 5 | 5 |
| 5 | 2 | 5 | 5 |
| 3 | 4 | 5 | 5 |
| 2 | 3 | 5 | 4 |
| 4 | 2 | 4 | 5 |
| 4 | 2 | 4 | 4 |
| 4 | 2 | 4 | 4 |
| 4 | 2 | 5 | 5 |
| 4 | 1 | 5 | 5 |
| 4 | 3 | 5 | 5 |
| 2 | 2 | 5 | 3 |
| 4 | 2 | 3 | 4 |
| 4 | 2 | 4 | 4 |
| 3 | 3 | 4 | 4 |
| 5 | 1 | 5 | 4 |
| 5 | 4 | 5 | 5 |
| 4 | 3 | 5 | 5 |
| 5 | 4 | 5 | 4 |
| 5 | 3 | 4 | 5 |
| 4 | 4 | 4 | 4 |
| 4 | 2 | 5 | 5 |
| 4 | 3 | 5 | 5 |
| 2 | 1 | 4 | 2 |
| 5 | 2 | 5 | 4 |
| 4 | 2 | 4 | 4 |
| 5 | 1 | 5 | 5 |
| 4 | 1 | 4 | 4 |
| 2 | 2 | 4 | 4 |
| 4 | 4 | 4 | 4 |
| 5 | 2 | 5 | 5 |
| 5 | 1 | 3 | 5 |
| 1 | 1 | 5 | 3 |
| 4 | 2 | 4 | 4 |
| 4 | 2 | 4 | 4 |
| 5 | 2 | 5 | 5 |
| 5 | 1 | 5 | 2 |
| 5 | 1 | 5 | 5 |
| 2 | 2 | 3 | 2 |
| 4 | 2 | 5 | 4 |
| 2 | 1 | 5 | 5 |
| 5 | 1 | 5 | 5 |
| 4 | 2 | 5 | 4 |
| 3 | 1 | 4 | 4 |
| 5 | 1 | 5 | 4 |
| 5 | 1 | 4 | 4 |
| 4 | 3 | 5 | 5 |
| 3 | 3 | 5 | 5 |

|   |   |   |   |
|---|---|---|---|
| 5 | 1 | 5 | 4 |
| 5 | 2 | 5 | 5 |
| 5 | 1 | 2 | 5 |
| 4 | 2 | 4 | 5 |
| 2 | 4 | 5 | 5 |
| 4 | 2 | 5 | 5 |
| 4 | 1 | 4 | 4 |
| 5 | 1 | 4 | 5 |
| 5 | 2 | 5 | 5 |
| 3 | 3 | 5 | 5 |
| 5 | 1 | 4 | 4 |
| 5 | 1 | 3 | 5 |
| 5 | 4 | 5 | 5 |
| 5 | 5 | 5 | 4 |
| 5 | 1 | 5 | 4 |
| 4 | 4 | 4 | 5 |
| 1 | 1 | 5 | 5 |
| 5 | 2 | 4 | 5 |
| 4 | 4 | 5 | 5 |
| 5 | 2 | 5 | 5 |
| 5 | 4 | 4 | 4 |
| 4 | 3 | 5 | 3 |
| 5 | 3 | 5 | 5 |
| 1 | 1 | 5 | 4 |
| 5 | 3 | 5 | 5 |
| 5 | 1 | 4 | 4 |
| 2 | 2 | 2 | 3 |
| 5 | 1 | 5 | 5 |
| 5 | 4 | 4 | 4 |
| 4 | 1 | 4 | 4 |
| 5 | 1 | 4 | 5 |
| 4 | 1 | 5 | 5 |
| 5 | 1 | 5 | 5 |
| 4 | 4 | 5 | 4 |
| 5 | 1 | 5 | 5 |
| 5 | 4 | 4 | 5 |
| 4 | 1 | 4 | 5 |
| 4 | 1 | 4 | 5 |
| 5 | 1 | 5 | 4 |
| 5 | 3 | 5 | 5 |
| 4 | 4 | 4 | 4 |
| 5 | 2 | 5 | 5 |
| 4 | 2 | 4 | 4 |
| 5 | 3 | 5 | 4 |
| 4 | 4 | 4 | 4 |
| 1 | 5 | 5 | 5 |
| 5 | 1 | 5 | 5 |
| 4 | 4 | 5 | 4 |

|    |    |     |    |
|----|----|-----|----|
| 4  | 4  | 3   | 4  |
| 4  | 3  | 5   | 5  |
| 5  | 1  | 5   | 5  |
| 2  | 2  | 2   | 3  |
| 5  | 1  | 4   | 4  |
| 5  | 2  | 5   | 4  |
| 5  | 2  | 3   | 4  |
| 4  | 1  | 5   | 5  |
| 2  | 5  | 5   | 5  |
| 4  | 2  | 5   | 5  |
| 5  | 1  | 3   | 4  |
| 5  | 1  | 5   | 5  |
| 8  | 69 | 2   | 2  |
| 15 | 67 | 5   | 6  |
| 29 | 33 | 17  | 22 |
| 70 | 26 | 66  | 81 |
| 81 | 8  | 113 | 92 |







What would be the most appropriate message? Other, please specify

|   |   |
|---|---|
| 5 | 1 |
| 5 | 1 |
| 1 | 5 |
| 2 | 5 |
| 3 | 1 |
| 5 | 1 |
| 5 | 1 |
| 2 | 1 |
| 5 | 1 |
| 3 | 1 |
| 3 | 1 |
| 4 | 1 |
| 5 | 1 |
| 5 | 1 |
| 5 | 1 |
| 5 | 1 |
| 4 | 1 |
| 5 | 1 |
| 5 | 1 |
| 4 | 1 |
| 1 | 1 |
| 4 | 1 |
| 5 | 1 |
| 5 | 1 |
| 5 | 5 |
| 5 | 1 |
| 3 | 1 |
| 2 | 1 |
| 5 | 2 |
| 4 | 1 |
| 4 | 1 |
| 5 | 1 |
| 2 | 1 |
| 4 | 1 |
| 5 | 1 |
| 4 | 1 |
| 1 | 3 |
| 5 | 1 |
| 3 | 1 |
| 4 | 3 |
| 4 | 1 |
| 5 | 1 |
| 5 | 1 |
| 3 | 1 |
| 5 | 1 |
| 4 | 1 |
| 3 | 1 |

|   |                              |
|---|------------------------------|
| 4 | 1                            |
| 5 | 1                            |
| 4 | 3                            |
| 4 | 1                            |
| 5 | 1                            |
| 4 | 1                            |
| 5 | 1                            |
| 4 | 1                            |
| 4 | 1                            |
| 5 | 1 Reduce world popuplat      |
| 3 | 3                            |
| 3 | 3                            |
| 5 | 1                            |
| 5 | 1                            |
| 4 | 1                            |
| 5 | 3                            |
| 2 | 1                            |
| 5 | 1                            |
| 4 | 1                            |
| 1 | 1 The industrialization kili |
| 5 | 1                            |
| 5 | 1                            |
| 4 | 1                            |
| 4 | 1                            |
| 4 | 1                            |
| 3 | 1                            |
| 3 | 1                            |
| 4 | 1                            |
| 5 | 1                            |
| 5 | 1                            |
| 4 | 1                            |
| 3 | 1                            |
| 3 | 1                            |
| 5 | 1                            |
| 5 | 1                            |
| 4 | 1                            |
| 4 | 1                            |
| 5 | 1                            |
| 4 | 1                            |
| 5 | 1                            |
| 5 | 1                            |
| 4 | 1                            |
| 5 | 1                            |
| 5 | 1                            |
| 4 | 1                            |
| 3 | 1                            |
| 4 | 1                            |
| 5 | 1 The changes will effect    |

|   |   |
|---|---|
| 4 | 1 |
| 5 | 1 |
| 2 | 1 |
| 5 | 1 |
| 4 | 1 |
| 4 | 1 |
| 4 | 1 |
| 4 | 1 |
| 5 | 1 |
| 5 | 1 |
| 5 | 1 |
| 3 | 1 |
| 4 | 1 |
| 4 | 1 |
| 4 | 1 |
| 4 | 1 |
| 5 | 1 |
| 5 | 1 |
| 3 | 1 |
| 5 | 1 |
| 4 | 1 |
| 5 | 1 |
| 5 | 1 |
| 3 | 1 |
| 5 | 1 |
| 3 | 2 |
| 5 | 1 |
| 2 | 1 |
| 4 | 1 |
| 3 | 1 |
| 5 | 1 |
| 5 | 1 |
| 3 | 1 |
| 4 | 1 |
| 4 | 1 |
| 5 | 1 |
| 4 | 1 |
| 1 | 1 |
| 4 | 1 |
| 5 | 1 |
| 5 | 1 |
| 5 | 1 |
| 3 | 1 |
| 2 | 1 |
| 4 | 1 |
| 5 | 1 |
| 5 | 1 |
| 5 | 1 |

|  |   |                             |
|--|---|-----------------------------|
|  | 4 | 1                           |
|  | 4 | 1                           |
|  | 3 | 1                           |
|  | 5 | 1                           |
|  | 5 | 1                           |
|  | 5 | 1                           |
|  | 4 | 1                           |
|  | 5 | 1                           |
|  | 3 | 1                           |
|  | 5 | 1                           |
|  | 3 | 1                           |
|  | 5 | 1                           |
|  | 5 | 4                           |
|  | 5 | 1                           |
|  | 4 | 1                           |
|  | 5 | 1                           |
|  | 5 | 1                           |
|  | 5 | 1                           |
|  | 4 | 1                           |
|  | 4 | 1                           |
|  | 3 | 1                           |
|  | 5 | 1                           |
|  | 5 | 1 n/a                       |
|  | 4 | 1                           |
|  | 5 | 1                           |
|  | 4 | 1                           |
|  | 5 | 1                           |
|  | 5 | 1                           |
|  | 3 | 1                           |
|  | 5 | 1                           |
|  | 5 | 1                           |
|  | 5 | 1                           |
|  | 2 | 1 Culture of nature         |
|  | 4 | 1                           |
|  | 3 | 1                           |
|  | 5 | 1                           |
|  | 5 | 1 Don't talk about about    |
|  | 5 | 1 Don't talk about about    |
|  | 5 | 1                           |
|  | 5 | 1                           |
|  | 4 | 1                           |
|  | 5 | 1 Bringing culturally relev |
|  | 4 | 1                           |
|  | 4 | 1 More ways to fix it. So r |
|  | 4 | 2                           |
|  | 5 | 2                           |
|  | 3 | 1                           |
|  | 4 | 1                           |

|    |       |
|----|-------|
| 5  | 1     |
| 5  | 1     |
| 3  | 1     |
| 3  | 1 Neg |
| 4  | 1     |
| 5  | 1     |
| 2  | 1     |
| 3  | 1     |
| 5  | 1     |
| 5  | 1     |
| 4  | 1     |
| 4  | 1     |
| 5  | 189   |
| 10 | 4     |
| 31 | 6     |
| 63 | 1     |
| 94 | 3     |

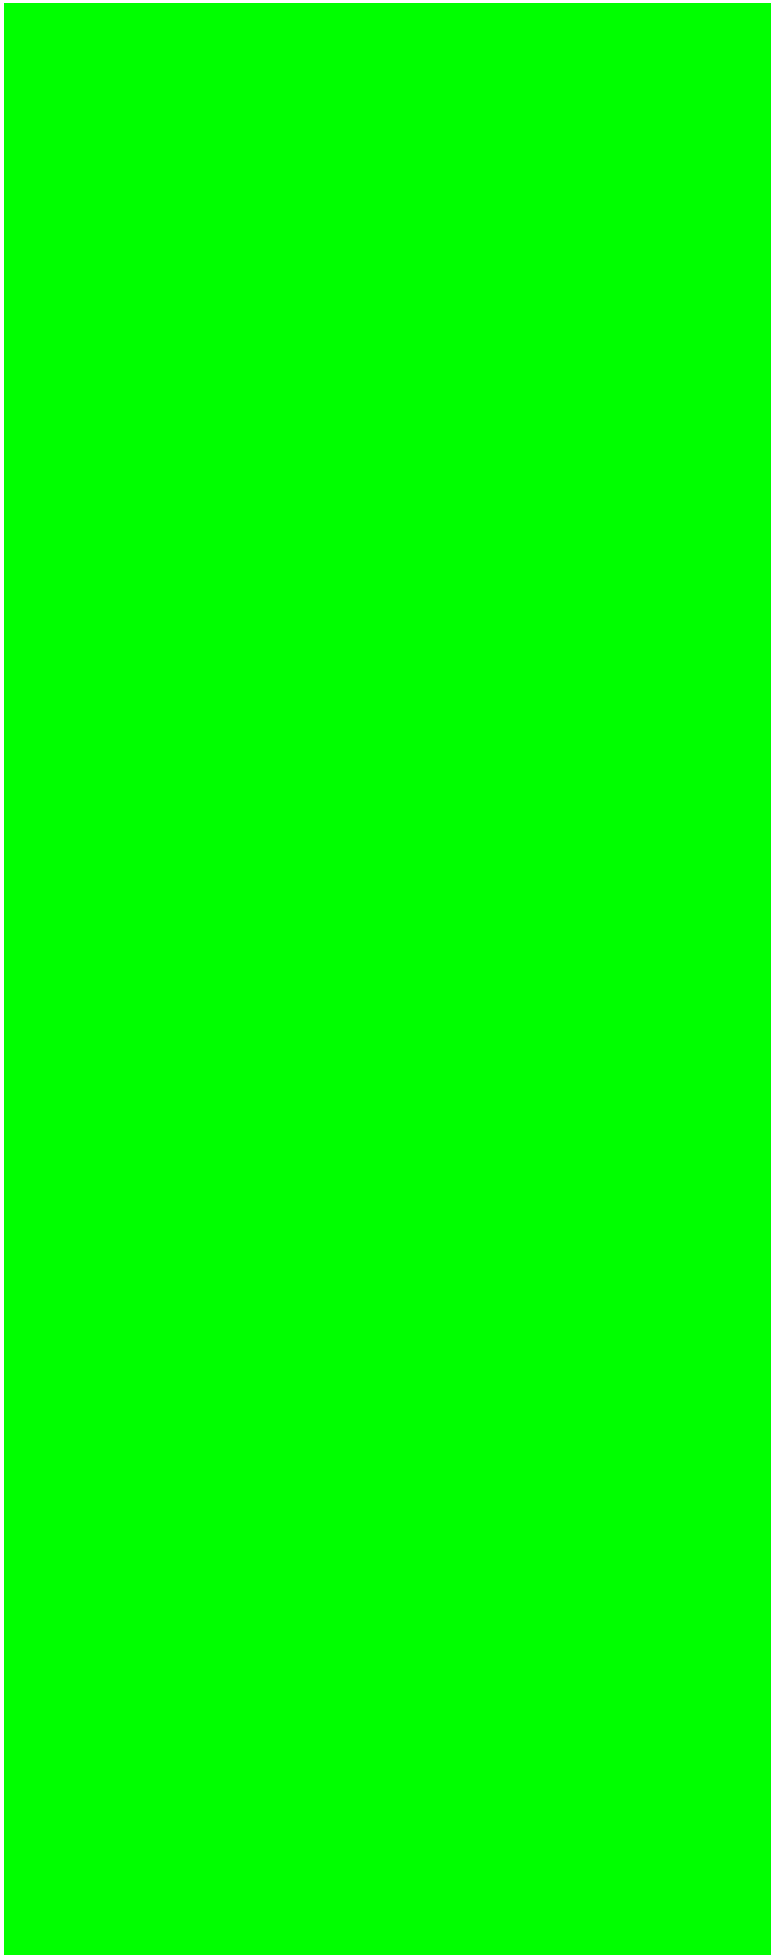

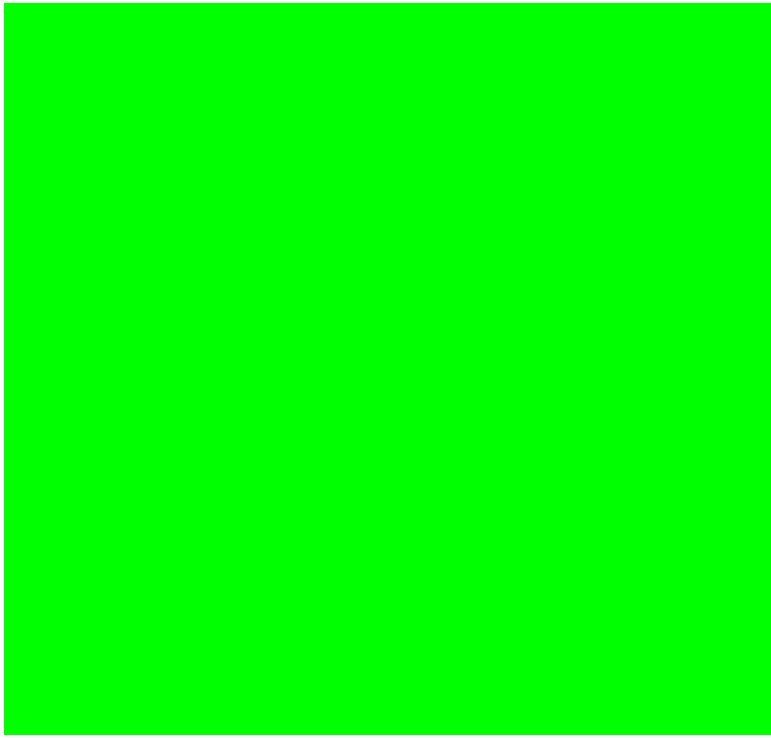

| What do you think climate change is? | What do you think climate change is? | Please, specify if you have heard of climate change | In your opinion, who is responsible for climate change? |
|--------------------------------------|--------------------------------------|-----------------------------------------------------|---------------------------------------------------------|
| 5                                    | 2                                    |                                                     | 5                                                       |
| 3                                    | 5                                    |                                                     | 5                                                       |
| 1                                    | 1                                    |                                                     | 4                                                       |
| 1                                    | 3                                    |                                                     | 1                                                       |
| 4                                    | 5                                    |                                                     | 5                                                       |
| 5                                    | 3                                    |                                                     | 5                                                       |
| 4                                    | 4                                    |                                                     | 4                                                       |
| 5                                    | 2                                    |                                                     | 4                                                       |
| 3                                    | 5                                    |                                                     | 5                                                       |
| 3                                    | 3                                    |                                                     | 3                                                       |
| 2                                    | 4                                    |                                                     | 1                                                       |
| 5                                    | 2                                    |                                                     | 5                                                       |
| 5                                    | 3                                    |                                                     | 5                                                       |
| 5                                    | 2                                    |                                                     | 3                                                       |
| 5                                    | 1                                    |                                                     | 5                                                       |
| 5                                    | 2                                    |                                                     | 4                                                       |
| 3                                    | 3                                    |                                                     | 5                                                       |
| 5                                    | 5                                    |                                                     | 4                                                       |
| 5                                    | 5                                    |                                                     | 4                                                       |
| 5                                    | 5                                    |                                                     | 5                                                       |
| 5                                    | 5                                    |                                                     | 3                                                       |
| 4                                    | 3                                    |                                                     | 4                                                       |
| 5                                    | 5                                    |                                                     | 5                                                       |
| 5                                    | 3                                    |                                                     | 5                                                       |
| 2                                    | 5                                    |                                                     | 5                                                       |
| 4                                    | 1                                    |                                                     | 5                                                       |
| 3                                    | 5                                    |                                                     | 5                                                       |
| 4                                    | 4                                    |                                                     | 4                                                       |
| 5                                    | 1                                    | No se debe asustar, se debe actuar                  | 5                                                       |
| 5                                    | 4                                    |                                                     | 5                                                       |
| 3                                    | 5                                    | Greenhouse effect                                   | 5                                                       |
| 5                                    | 5                                    |                                                     | 5                                                       |
| 5                                    | 5                                    |                                                     | 5                                                       |
| 4                                    | 5                                    |                                                     | 5                                                       |
| 5                                    | 5                                    |                                                     | 5                                                       |
| 2                                    | 5                                    | Climate crisis                                      | 4                                                       |
| 1                                    | 2                                    |                                                     | 3                                                       |
| 5                                    | 4                                    | 413 / 5000 Resultados                               | 5                                                       |
| 4                                    | 1                                    |                                                     | 4                                                       |
| 4                                    | 3                                    |                                                     | 4                                                       |
| 5                                    | 3                                    |                                                     | 3                                                       |
| 5                                    | 5                                    |                                                     | 5                                                       |
| 4                                    | 3                                    |                                                     | 4                                                       |
| 2                                    | 4                                    |                                                     | 4                                                       |
| 5                                    | 1                                    |                                                     | 5                                                       |
| 3                                    | 4                                    |                                                     | 4                                                       |
| 5                                    | 3                                    |                                                     | 5                                                       |



|  |   |   |                          |   |
|--|---|---|--------------------------|---|
|  | 4 | 4 |                          | 5 |
|  | 5 | 4 |                          | 5 |
|  | 2 | 4 |                          | 4 |
|  | 5 | 5 |                          | 4 |
|  | 5 | 3 |                          | 5 |
|  | 5 | 4 |                          | 5 |
|  | 5 | 3 |                          | 5 |
|  | 4 | 3 |                          | 4 |
|  | 5 | 1 |                          | 3 |
|  | 5 | 1 |                          | 5 |
|  | 4 | 4 |                          | 5 |
|  | 4 | 4 |                          | 5 |
|  | 5 | 2 |                          | 5 |
|  | 4 | 5 |                          | 5 |
|  | 5 | 3 |                          | 5 |
|  | 4 | 5 |                          | 5 |
|  | 5 | 2 |                          | 4 |
|  | 4 | 5 |                          | 5 |
|  | 5 | 2 | Global climate change    | 4 |
|  | 5 | 4 | The climate change be    | 5 |
|  | 5 | 2 |                          | 4 |
|  | 5 | 3 |                          | 5 |
|  | 5 | 3 |                          | 4 |
|  | 5 | 3 |                          | 3 |
|  | 4 | 2 |                          | 5 |
|  | 5 | 2 |                          | 5 |
|  | 4 | 3 |                          | 4 |
|  | 5 | 2 |                          | 5 |
|  | 5 | 5 | I also want to know it!P | 4 |
|  | 5 | 5 | I also want to know it!P | 4 |
|  | 4 | 1 |                          | 4 |
|  | 5 | 5 |                          | 4 |
|  | 5 | 1 |                          | 3 |
|  | 5 | 1 |                          | 5 |
|  | 5 | 3 |                          | 5 |
|  | 5 | 1 |                          | 3 |
|  | 5 | 3 |                          | 4 |
|  | 5 | 4 |                          | 5 |
|  | 4 | 4 |                          | 5 |
|  | 5 | 4 |                          | 4 |
|  | 5 | 4 |                          | 4 |
|  | 5 | 3 |                          | 4 |
|  | 5 | 1 |                          | 1 |
|  | 5 | 1 |                          | 5 |
|  | 5 | 3 |                          | 4 |
|  | 5 | 3 | Global change            | 4 |
|  | 4 | 4 |                          | 4 |
|  | 5 | 2 | Environment changes      | 2 |

|  |   |   |                         |   |
|--|---|---|-------------------------|---|
|  | 4 | 5 |                         | 5 |
|  | 5 | 4 |                         | 4 |
|  | 5 | 1 |                         | 5 |
|  | 5 | 2 | Anthropomorphic climate | 4 |
|  | 5 | 5 |                         | 5 |
|  | 4 | 3 |                         | 4 |
|  | 4 | 3 |                         | 4 |
|  | 5 | 3 |                         | 5 |
|  | 5 | 5 |                         | 5 |
|  | 4 | 5 |                         | 5 |
|  | 5 | 3 |                         | 5 |
|  | 4 | 3 |                         | 5 |
|  | 5 | 3 |                         | 4 |
|  | 4 | 4 |                         | 4 |
|  | 5 | 3 |                         | 4 |
|  | 5 | 4 |                         | 5 |
|  | 5 | 4 |                         | 3 |
|  | 5 | 2 |                         | 5 |
|  | 4 | 4 |                         | 4 |
|  | 5 | 1 |                         | 5 |
|  | 4 | 4 |                         | 5 |
|  | 5 | 2 |                         | 5 |
|  | 3 | 4 |                         | 5 |
|  | 5 | 3 |                         | 5 |
|  | 5 | 3 |                         | 4 |
|  | 4 | 2 |                         | 3 |
|  | 5 | 3 |                         | 5 |
|  | 5 | 2 |                         | 5 |
|  | 4 | 4 |                         | 5 |
|  | 5 | 4 |                         | 5 |
|  | 4 | 5 |                         | 4 |
|  | 5 | 3 |                         | 5 |
|  | 5 | 3 |                         | 4 |
|  | 5 | 3 |                         | 5 |
|  | 5 | 3 |                         | 4 |
|  | 5 | 4 |                         | 4 |
|  | 2 | 5 |                         | 5 |
|  | 3 | 5 |                         | 5 |
|  | 4 | 5 |                         | 5 |
|  | 5 | 4 |                         | 4 |
|  | 5 | 1 | climate crisis          | 5 |
|  | 5 | 2 |                         | 5 |
|  | 5 | 3 |                         | 5 |
|  | 4 | 5 |                         | 5 |
|  | 4 | 4 |                         | 5 |
|  | 5 | 3 | Climate Evolution       | 5 |
|  | 5 | 1 |                         | 5 |
|  | 1 | 5 |                         | 5 |

|  |   |   |                          |   |
|--|---|---|--------------------------|---|
|  | 4 | 4 |                          | 5 |
|  | 5 | 3 |                          | 5 |
|  | 5 | 1 |                          | 5 |
|  | 5 | 2 |                          | 5 |
|  | 5 | 1 |                          | 5 |
|  | 2 | 4 |                          | 5 |
|  | 5 | 1 |                          | 3 |
|  | 5 | 1 |                          | 5 |
|  | 5 | 3 |                          | 4 |
|  | 5 | 5 |                          | 4 |
|  | 4 | 2 |                          | 4 |
|  | 5 | 4 |                          | 4 |
|  | 1 | 5 |                          | 5 |
|  | 4 | 3 | Climate disruption       | 5 |
|  | 5 | 1 |                          | 5 |
|  | 5 | 3 |                          | 5 |
|  | 5 | 1 |                          | 3 |
|  | 5 | 2 | climate disruption       | 5 |
|  | 5 | 4 |                          | 5 |
|  | 3 | 3 |                          | 5 |
|  | 5 | 5 |                          | 5 |
|  | 4 | 4 |                          | 4 |
|  | 5 | 5 | n/a                      | 5 |
|  | 5 | 5 |                          | 5 |
|  | 5 | 5 |                          | 5 |
|  | 4 | 5 |                          | 5 |
|  | 5 | 2 |                          | 3 |
|  | 4 | 5 |                          | 4 |
|  | 3 | 4 |                          | 4 |
|  | 5 | 5 | Earth emergency          | 2 |
|  | 5 | 1 |                          | 5 |
|  | 4 | 1 |                          | 5 |
|  | 5 | 4 |                          | 4 |
|  | 5 | 4 |                          | 5 |
|  | 4 | 4 | at the same level deper  | 4 |
|  | 2 | 5 | Climate Change has no    | 5 |
|  | 2 | 1 | Climate disruption. (Cfr | 5 |
|  | 2 | 1 | Climate disruption. (Cfr | 5 |
|  | 5 | 4 |                          | 5 |
|  | 4 | 5 |                          | 5 |
|  | 4 | 2 | Climate catastrophe      | 2 |
|  | 5 | 1 |                          | 2 |
|  | 5 | 4 |                          | 4 |
|  | 5 | 4 |                          | 5 |
|  | 5 | 5 |                          | 5 |
|  | 5 | 5 |                          | 5 |
|  | 5 | 1 |                          | 5 |
|  | 5 | 1 |                          | 4 |

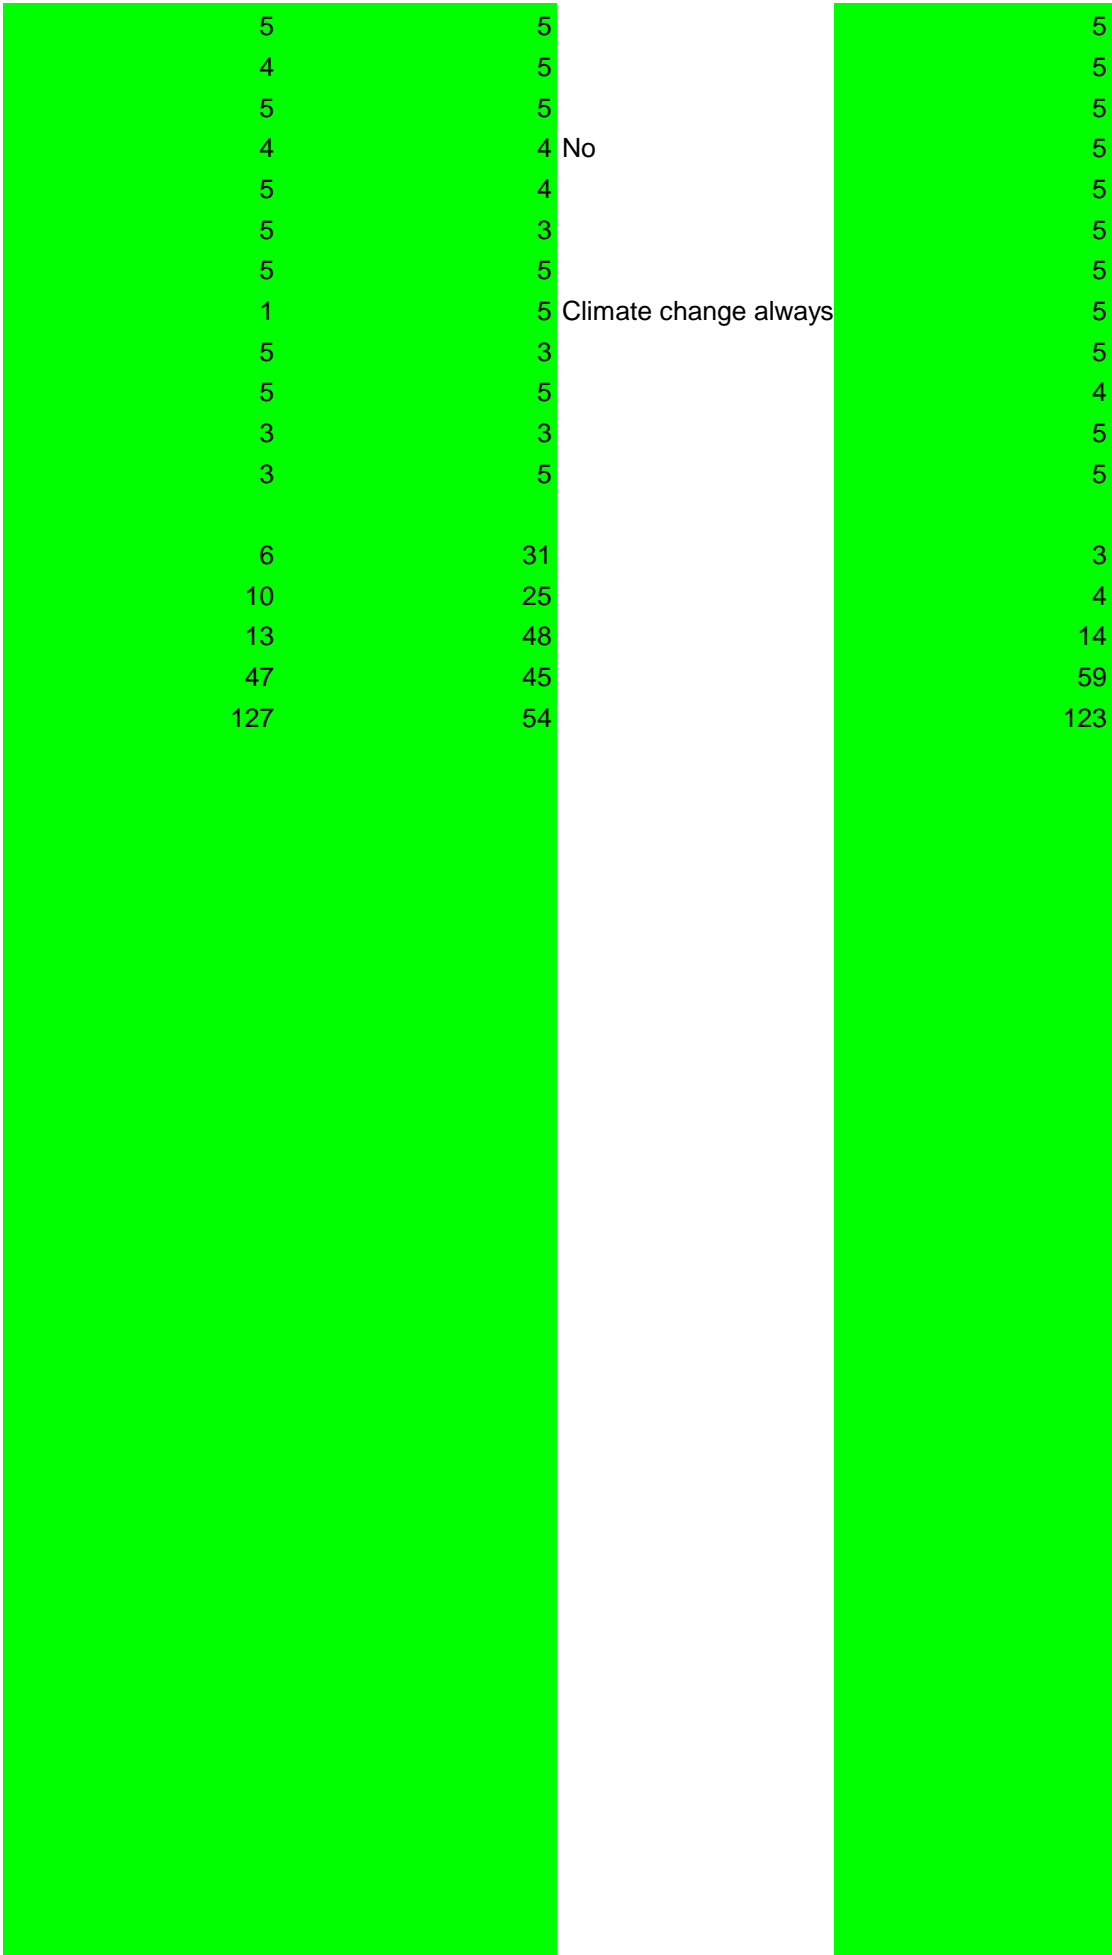

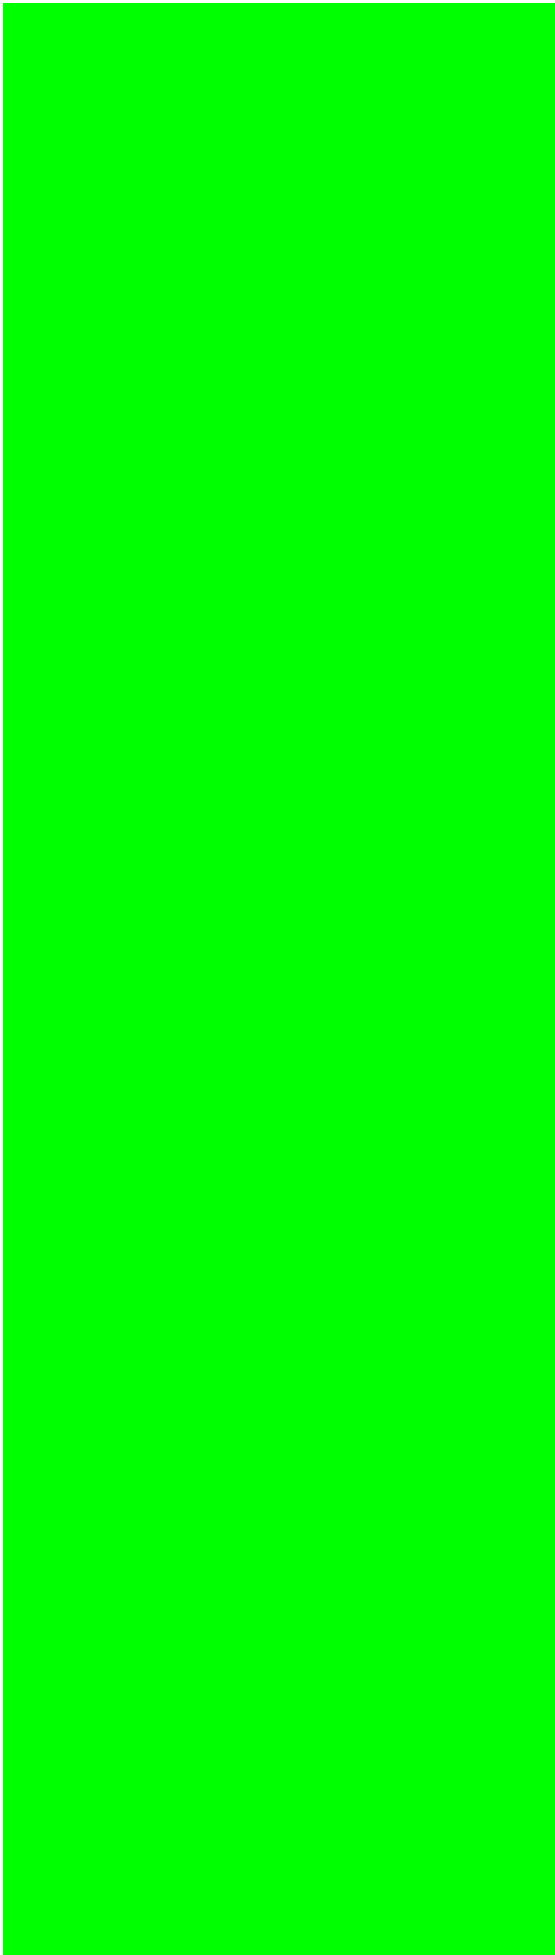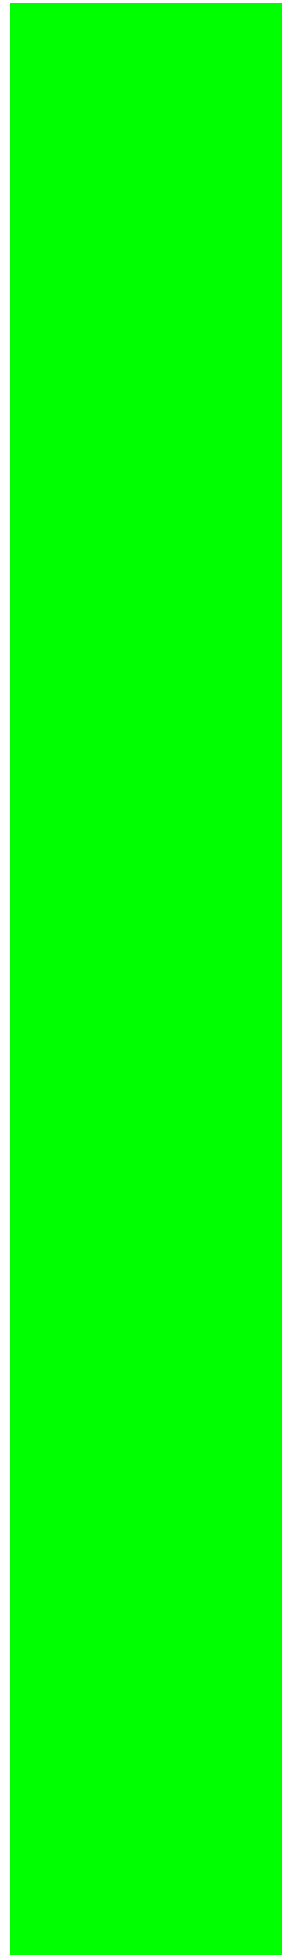

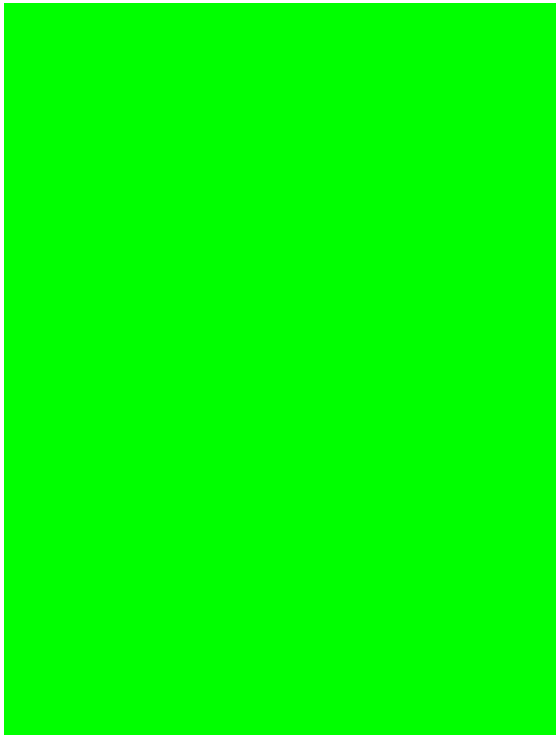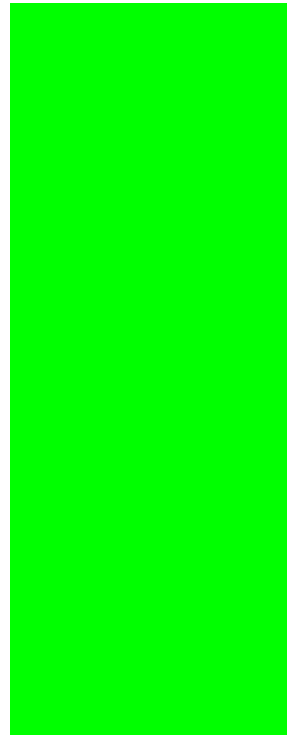

| In your opinion, who is |
|-------------------------|-------------------------|-------------------------|-------------------------|
| 5                       | 5                       | 5                       | 5                       |
| 4                       | 3                       | 4                       | 4                       |
| 2                       | 1                       | 5                       | 4                       |
| 2                       | 4                       | 4                       | 1                       |
| 5                       | 3                       | 4                       | 4                       |
| 5                       | 5                       | 5                       | 5                       |
| 4                       | 4                       | 5                       | 4                       |
| 5                       | 2                       | 5                       | 3                       |
| 4                       | 4                       | 5                       | 4                       |
| 3                       | 3                       | 3                       | 3                       |
| 2                       | 1                       | 4                       | 1                       |
| 5                       | 4                       | 5                       | 5                       |
| 5                       | 5                       | 5                       | 5                       |
| 5                       | 5                       | 4                       | 3                       |
| 5                       | 5                       | 5                       | 5                       |
| 4                       | 4                       | 4                       | 4                       |
| 5                       | 5                       | 5                       | 5                       |
| 4                       | 3                       | 5                       | 2                       |
| 4                       | 3                       | 5                       | 2                       |
| 5                       | 5                       | 5                       | 5                       |
| 4                       | 5                       | 5                       | 4                       |
| 5                       | 4                       | 5                       | 3                       |
| 5                       | 5                       | 5                       | 5                       |
| 5                       | 4                       | 4                       | 4                       |
| 5                       | 5                       | 5                       | 5                       |
| 5                       | 5                       | 5                       | 5                       |
| 4                       | 2                       | 3                       | 2                       |
| 4                       | 4                       | 4                       | 4                       |
| 4                       | 4                       | 3                       | 4                       |
| 5                       | 5                       | 5                       | 5                       |
| 5                       | 5                       | 5                       | 5                       |
| 5                       | 5                       | 5                       | 5                       |
| 4                       | 5                       | 5                       | 4                       |
| 5                       | 5                       | 4                       | 4                       |
| 3                       | 3                       | 1                       | 1                       |
| 5                       | 4                       | 5                       | 5                       |
| 4                       | 4                       | 4                       | 4                       |
| 4                       | 4                       | 4                       | 4                       |
| 5                       | 4                       | 5                       | 3                       |
| 5                       | 5                       | 5                       | 5                       |
| 5                       | 5                       | 5                       | 4                       |
| 5                       | 5                       | 3                       | 3                       |
| 5                       | 3                       | 1                       | 4                       |
| 5                       | 4                       | 4                       | 4                       |
| 5                       | 5                       | 5                       | 5                       |

|   |   |   |   |
|---|---|---|---|
| 5 | 5 | 5 | 5 |
| 5 | 5 | 5 | 4 |
| 4 | 4 | 3 | 3 |
| 4 | 4 | 4 | 4 |
| 5 | 2 | 5 | 5 |
| 5 | 5 | 5 | 5 |
| 5 | 5 | 5 | 5 |
| 4 | 4 | 4 | 4 |
| 4 | 4 | 4 | 2 |
| 5 | 5 | 5 | 5 |
| 5 | 3 | 5 | 5 |
| 5 | 3 | 5 | 5 |
| 5 | 4 | 5 | 4 |
| 5 | 5 | 5 | 5 |
| 5 | 5 | 4 | 4 |
| 5 | 5 | 5 | 5 |
| 4 | 4 | 4 | 4 |
| 4 | 3 | 5 | 3 |
| 4 | 3 | 5 | 3 |
| 4 | 5 | 5 | 5 |
| 3 | 1 | 3 | 4 |
| 5 | 3 | 5 | 5 |
| 4 | 4 | 4 | 4 |
| 4 | 3 | 3 | 2 |
| 5 | 4 | 5 | 5 |
| 5 | 5 | 5 | 5 |
| 4 | 4 | 3 | 4 |
| 5 | 5 | 4 | 4 |
| 5 | 5 | 4 | 5 |
| 5 | 5 | 4 | 5 |
| 5 | 3 | 5 | 2 |
| 4 | 4 | 4 | 3 |
| 4 | 4 | 5 | 4 |
| 3 | 1 | 5 | 5 |
| 4 | 4 | 5 | 3 |
| 5 | 1 | 2 | 2 |
| 5 | 4 | 3 | 4 |
| 5 | 4 | 5 | 4 |
| 5 | 4 | 5 | 5 |
| 4 | 5 | 5 | 5 |
| 4 | 5 | 5 | 1 |
| 4 | 3 | 5 | 4 |
| 2 | 2 | 1 | 1 |
| 5 | 5 | 5 | 5 |
| 4 | 3 | 3 | 4 |
| 4 | 5 | 5 | 4 |
| 5 | 3 | 4 | 4 |
| 3 | 1 | 4 | 4 |



|   |   |   |   |
|---|---|---|---|
| 3 | 5 | 4 | 4 |
| 4 | 4 | 5 | 5 |
| 5 | 5 | 5 | 5 |
| 5 | 4 | 4 | 4 |
| 5 | 5 | 4 | 5 |
| 4 | 4 | 4 | 4 |
| 3 | 3 | 4 | 3 |
| 5 | 5 | 5 | 5 |
| 5 | 5 | 5 | 4 |
| 5 | 3 | 4 | 5 |
| 5 | 4 | 3 | 4 |
| 4 | 5 | 4 | 4 |
| 4 | 4 | 4 | 4 |
| 4 | 4 | 5 | 4 |
| 4 | 4 | 4 | 4 |
| 5 | 5 | 5 | 4 |
| 4 | 3 | 2 | 4 |
| 5 | 4 | 5 | 5 |
| 5 | 5 | 5 | 5 |
| 5 | 5 | 5 | 3 |
| 5 | 4 | 4 | 4 |
| 4 | 4 | 5 | 5 |
| 5 | 5 | 5 | 5 |
| 5 | 5 | 4 | 4 |
| 5 | 5 | 5 | 4 |
| 3 | 2 | 3 | 2 |
| 5 | 5 | 5 | 5 |
| 5 | 5 | 5 | 5 |
| 4 | 4 | 4 | 4 |
| 5 | 5 | 5 | 5 |
| 3 | 4 | 1 | 1 |
| 5 | 4 | 4 | 3 |
| 4 | 4 | 4 | 4 |
| 4 | 5 | 5 | 5 |
| 4 | 4 | 4 | 4 |
| 4 | 4 | 5 | 3 |
| 5 | 4 | 5 | 5 |
| 5 | 5 | 5 | 5 |
| 4 | 5 | 5 | 3 |
| 5 | 3 | 5 | 2 |
| 5 | 5 | 5 | 1 |
| 5 | 5 | 5 | 1 |
| 4 | 3 | 3 | 3 |
| 5 | 5 | 5 | 5 |
| 4 | 5 | 4 | 4 |
| 4 | 4 | 5 | 5 |
| 4 | 3 | 5 | 4 |
| 4 | 4 | 5 | 5 |

|   |   |   |   |
|---|---|---|---|
| 4 | 3 | 5 | 5 |
| 5 | 5 | 5 | 3 |
| 5 | 5 | 4 | 3 |
| 5 | 2 | 5 | 5 |
| 5 | 5 | 5 | 5 |
| 5 | 4 | 5 | 4 |
| 4 | 1 | 5 | 3 |
| 5 | 5 | 5 | 5 |
| 5 | 4 | 5 | 4 |
| 4 | 4 | 4 | 4 |
| 3 | 2 | 5 | 3 |
| 5 | 5 | 4 | 4 |
| 5 | 4 | 4 | 4 |
| 5 | 4 | 5 | 5 |
| 5 | 5 | 5 | 5 |
| 5 | 5 | 5 | 5 |
| 3 | 3 | 1 | 1 |
| 5 | 4 | 5 | 5 |
| 4 | 3 | 4 | 4 |
| 5 | 5 | 5 | 5 |
| 5 | 5 | 5 | 5 |
| 4 | 4 | 5 | 3 |
| 5 | 5 | 5 | 5 |
| 5 | 5 | 5 | 5 |
| 5 | 5 | 5 | 5 |
| 5 | 5 | 5 | 4 |
| 3 | 3 | 4 | 4 |
| 5 | 4 | 4 | 3 |
| 5 | 5 | 4 | 4 |
| 4 | 5 | 5 | 5 |
| 5 | 5 | 5 | 5 |
| 5 | 5 | 5 | 5 |
| 5 | 5 | 3 | 3 |
| 4 | 4 | 5 | 5 |
| 4 | 2 | 4 | 3 |
| 5 | 5 | 5 | 5 |
| 5 | 5 | 5 | 5 |
| 5 | 5 | 5 | 5 |
| 5 | 5 | 3 | 4 |
| 5 | 5 | 5 | 4 |
| 4 | 4 | 2 | 2 |
| 4 | 4 | 1 | 1 |
| 4 | 4 | 4 | 4 |
| 5 | 4 | 5 | 3 |
| 3 | 3 | 4 | 3 |
| 5 | 5 | 5 | 5 |
| 5 | 5 | 5 | 5 |
| 4 | 4 | 4 | 4 |

|     |    |     |    |
|-----|----|-----|----|
| 5   | 5  | 5   | 5  |
| 5   | 5  | 4   | 4  |
| 5   | 1  | 4   | 5  |
| 5   | 1  | 4   | 5  |
| 5   | 5  | 5   | 3  |
| 4   | 4  | 4   | 4  |
| 4   | 5  | 5   | 4  |
| 4   | 5  | 5   | 5  |
| 5   | 5  | 4   | 3  |
| 3   | 5  | 1   | 2  |
| 5   | 5  | 5   | 5  |
| 4   | 3  | 5   | 5  |
| 0   | 9  | 7   | 10 |
| 4   | 8  | 3   | 11 |
| 14  | 29 | 15  | 29 |
| 67  | 63 | 57  | 70 |
| 118 | 94 | 121 | 83 |





| In your opinion, who is | In your opinion, who is | In your opinion, who is |
|-------------------------|-------------------------|-------------------------|
| 5                       | 5                       | 5                       |
| 4                       | 4                       | 4                       |
| 2                       | 4                       | 4                       |
| 1                       | 2                       | 2                       |
| 4                       | 4                       | 4                       |
| 5                       | 5                       | 5                       |
| 4                       | 5                       | 4                       |
| 5                       | 5                       | 5                       |
| 5                       | 4                       | 5                       |
| 3                       | 3                       | 3                       |
| 2                       | 1                       | 1                       |
| 5                       | 4                       | 5                       |
| 5                       | 5                       | 5                       |
| 5                       | 3                       | 3                       |
| 5                       | 5                       | 5                       |
| 4                       | 4                       | 4                       |
| 5                       | 5                       | 5                       |
| 4                       | 2                       | 3                       |
| 4                       | 2                       | 3                       |
| 5                       | 5                       | 5                       |
| 5                       | 5                       | 5                       |
| 5                       | 4                       | 5                       |
| 5                       | 5                       | 5                       |
| 4                       | 4                       | 5                       |
| 5                       | 5                       | 5                       |
| 5                       | 5                       | 5                       |
| 5                       | 5                       | 5                       |
| 4                       | 3                       | 5                       |
| 5                       | 5                       | 5                       |
| 5                       | 5                       | 4                       |
| 5                       | 5                       | 5                       |
| 5                       | 5                       | 5                       |
| 5                       | 5                       | 5                       |
| 5                       | 5                       | 5                       |
| 5                       | 5                       | 5                       |
| 4                       | 5                       | 4                       |
| 1                       | 1                       | 2                       |
| 5                       | 5                       | 5                       |
| 4                       | 4                       | 4                       |
| 4                       | 4                       | 4                       |
| 4                       | 4                       | 4                       |
| 5                       | 5                       | 5                       |
| 4                       | 4                       | 4                       |
| 4                       | 4                       | 4                       |
| 5                       | 4                       | 5                       |
| 4                       | 4                       | 4                       |
| 5                       | 5                       | 5                       |

|   |   |   |
|---|---|---|
| 5 | 5 | 5 |
| 5 | 5 | 5 |
| 4 | 4 | 4 |
| 4 | 4 | 4 |
| 5 | 5 | 5 |
| 5 | 5 | 5 |
| 5 | 5 | 5 |
| 4 | 4 | 4 |
| 4 | 4 | 2 |
| 5 | 5 | 5 |
| 5 | 5 | 5 |
| 5 | 5 | 5 |
| 3 | 5 | 5 |
| 5 | 5 | 4 |
| 3 | 1 | 2 |
| 5 | 3 | 4 |
| 4 | 4 | 4 |
| 3 | 4 | 2 |
| 4 | 4 | 3 |
| 5 | 3 | 5 |
| 3 | 4 | 4 |
| 3 | 5 | 2 |
| 4 | 4 | 4 |
| 4 | 4 | 4 |
| 5 | 5 | 4 |
| 5 | 5 | 5 |
| 4 | 4 | 4 |
| 5 | 4 | 5 |
| 5 | 5 | 4 |
| 5 | 5 | 4 |
| 5 | 5 | 5 |
| 4 | 4 | 4 |
| 3 | 4 | 3 |
| 3 | 5 | 3 |
| 5 | 4 | 4 |
| 3 | 3 | 3 |
| 4 | 4 | 3 |
| 4 | 5 | 5 |
| 5 | 4 | 4 |
| 5 | 5 | 5 |
| 4 | 3 | 4 |
| 4 | 5 | 4 |
| 3 | 3 | 5 |
| 4 | 4 | 4 |
| 4 | 3 | 3 |
| 5 | 5 | 5 |
| 4 | 4 | 4 |
| 4 | 4 | 1 |

|   |   |   |
|---|---|---|
| 5 | 4 | 4 |
| 4 | 4 | 4 |
| 5 | 5 | 5 |
| 3 | 4 | 4 |
| 5 | 4 | 4 |
| 4 | 4 | 4 |
| 3 | 4 | 3 |
| 5 | 5 | 5 |
| 5 | 5 | 5 |
| 5 | 5 | 5 |
| 5 | 4 | 5 |
| 5 | 4 | 5 |
| 4 | 4 | 4 |
| 4 | 4 | 4 |
| 4 | 5 | 4 |
| 4 | 4 | 4 |
| 4 | 5 | 5 |
| 4 | 3 | 5 |
| 5 | 5 | 3 |
| 4 | 3 | 2 |
| 5 | 4 | 4 |
| 4 | 4 | 4 |
| 5 | 5 | 4 |
| 5 | 5 | 5 |
| 5 | 5 | 5 |
| 5 | 5 | 5 |
| 2 | 2 | 2 |
| 5 | 5 | 5 |
| 5 | 5 | 5 |
| 5 | 3 | 4 |
| 5 | 5 | 5 |
| 3 | 1 | 5 |
| 3 | 4 | 3 |
| 4 | 4 | 4 |
| 5 | 4 | 5 |
| 4 | 4 | 4 |
| 4 | 4 | 2 |
| 5 | 5 | 4 |
| 5 | 5 | 5 |
| 5 | 5 | 5 |
| 4 | 4 | 2 |
| 2 | 3 | 5 |
| 3 | 3 | 5 |
| 4 | 4 | 3 |
| 5 | 3 | 3 |
| 4 | 3 | 2 |
| 5 | 5 | 5 |
| 4 | 5 | 3 |
| 5 | 5 | 5 |



|   |   |   |
|---|---|---|
| 4 | 4 | 3 |
| 5 | 5 | 5 |
| 5 | 5 | 3 |
| 5 | 5 | 3 |
| 5 | 5 | 5 |
| 5 | 5 | 5 |
| 5 | 5 | 5 |
| 4 | 4 | 3 |
| 4 | 4 | 4 |
| 4 | 4 | 2 |
| 4 | 5 | 4 |
| 5 | 5 | 5 |
| 5 | 5 | 5 |
| 5 | 5 | 5 |
| 3 | 3 | 5 |
| 5 | 5 | 5 |
| 5 | 5 | 4 |
| 5 | 5 | 5 |
| 5 | 5 | 5 |
| 5 | 4 | 5 |
| 5 | 5 | 5 |
| 5 | 5 | 5 |
| 5 | 5 | 5 |
| 4 | 5 | 4 |
| 4 | 4 | 3 |
| 3 | 4 | 3 |
| 4 | 4 | 4 |
| 5 | 5 | 5 |
| 5 | 5 | 5 |
| 5 | 5 | 5 |
| 4 | 4 | 5 |
| 4 | 5 | 5 |
| 4 | 3 | 2 |
| 5 | 5 | 5 |
| 5 | 5 | 5 |
| 5 | 5 | 5 |
| 5 | 4 | 5 |
| 4 | 4 | 3 |
| 4 | 2 | 4 |
| 2 | 3 | 5 |
| 4 | 5 | 4 |
| 4 | 5 | 5 |
| 5 | 3 | 5 |
| 5 | 5 | 5 |
| 5 | 5 | 5 |
| 4 | 4 | 4 |

|     |     |     |
|-----|-----|-----|
| 5   | 5   | 5   |
| 4   | 4   | 4   |
| 3   | 4   | 4   |
| 1   | 1   | 1   |
| 4   | 5   | 4   |
| 5   | 4   | 4   |
| 4   | 4   | 5   |
| 5   | 5   | 5   |
| 5   | 4   | 3   |
| 4   | 2   | 2   |
| 5   | 5   | 5   |
| 4   | 5   | 5   |
| 3   | 5   | 3   |
| 5   | 6   | 14  |
| 18  | 20  | 24  |
| 70  | 71  | 60  |
| 107 | 101 | 102 |

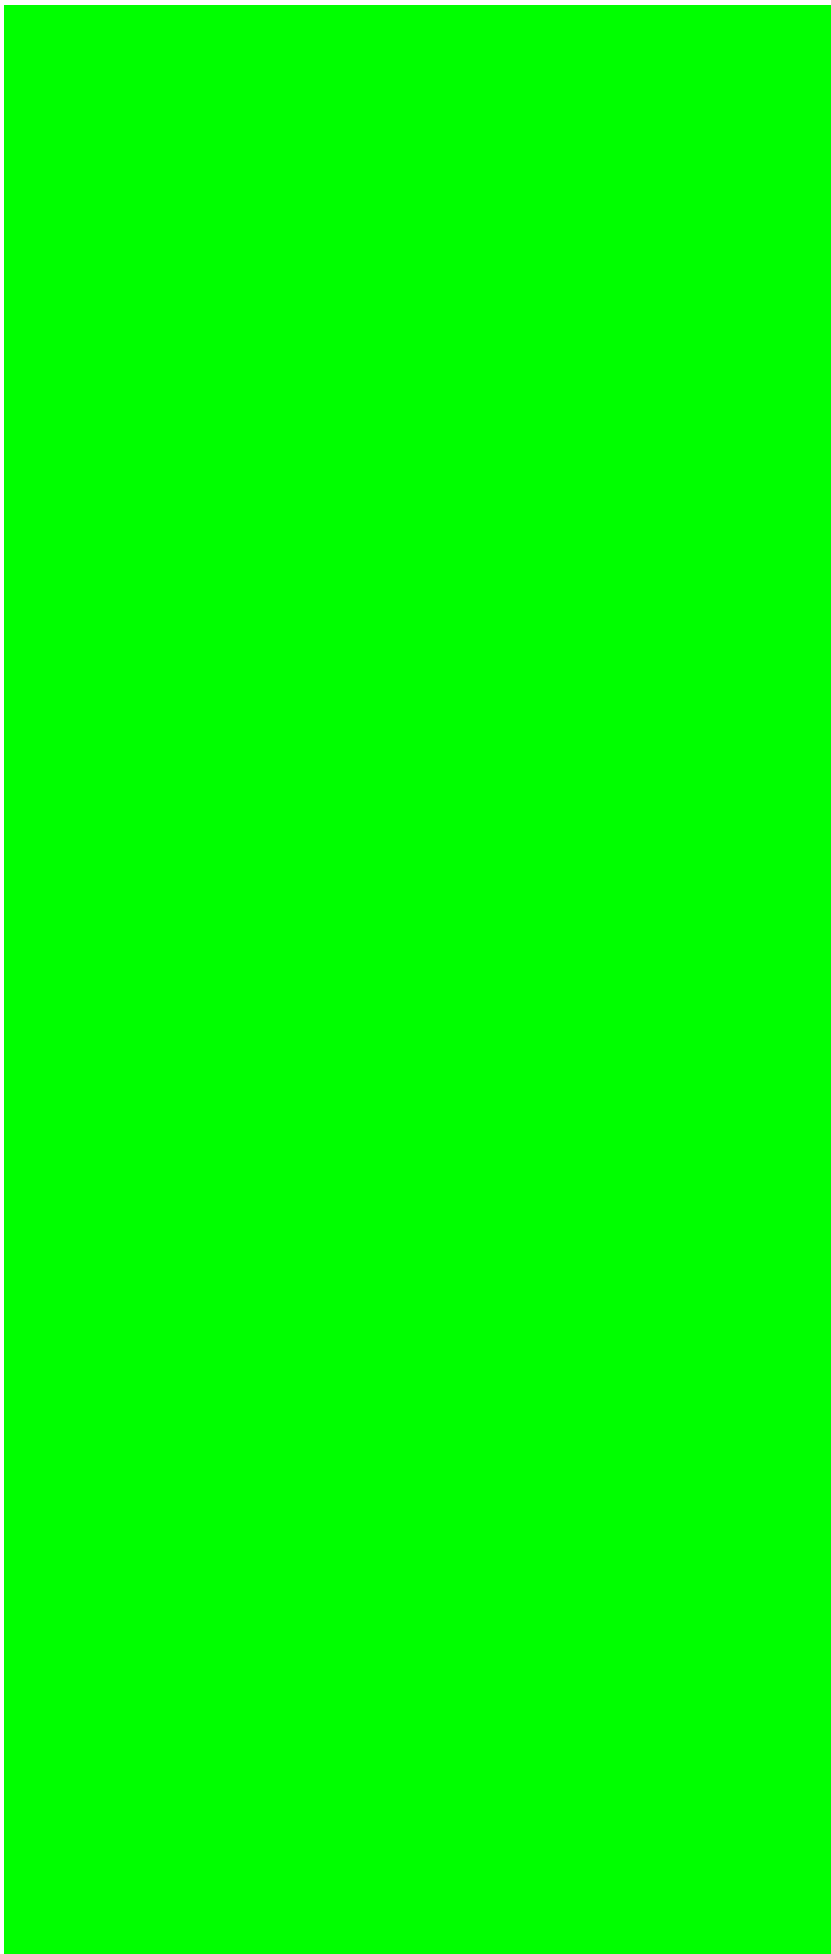

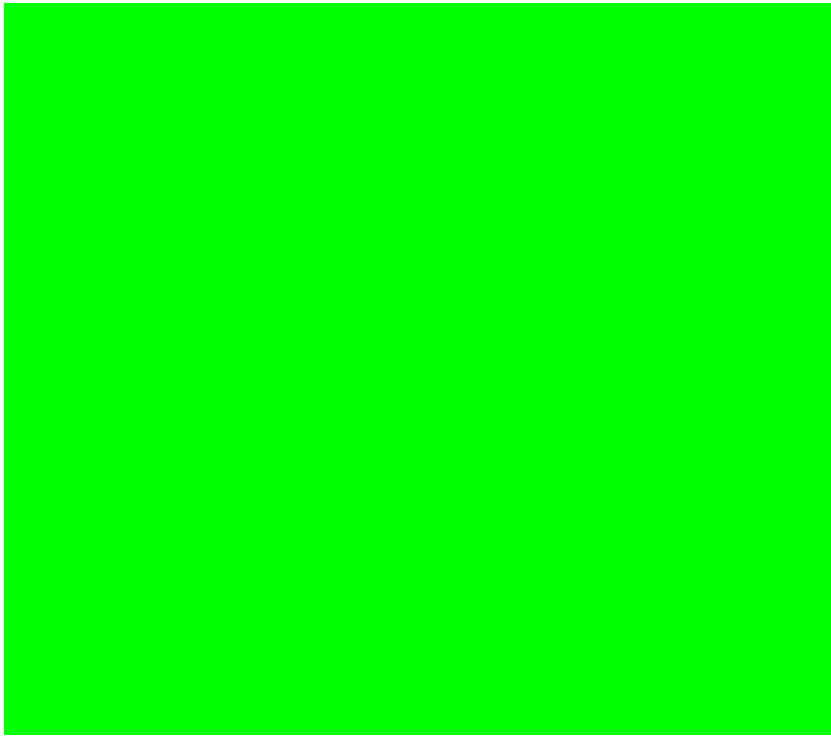

| In your opinion, who is more directly responsible for the problem? | In your opinion, who is more directly responsible for the problem? | In your opinion, who is more directly responsible for the problem? |
|--------------------------------------------------------------------|--------------------------------------------------------------------|--------------------------------------------------------------------|
| 1                                                                  | 5                                                                  | 1                                                                  |
| 1                                                                  | 3                                                                  | 4                                                                  |
| 4                                                                  | 4                                                                  | 4                                                                  |
| 5                                                                  | 1                                                                  | 5                                                                  |
| 3                                                                  | 3                                                                  | 2                                                                  |
| 3                                                                  | 5                                                                  | 5                                                                  |
| 1                                                                  | 1                                                                  | 2                                                                  |
| 2                                                                  | 3                                                                  | 2                                                                  |
| 2                                                                  | 2                                                                  | 4                                                                  |
| 2                                                                  | 3                                                                  | 2                                                                  |
| 1                                                                  | 3                                                                  | 1                                                                  |
| 1                                                                  | 3                                                                  | 5                                                                  |
| 2                                                                  | 5                                                                  | 2                                                                  |
| 4                                                                  | 4                                                                  | 5                                                                  |
| 5                                                                  | 5                                                                  | 5                                                                  |
| 3                                                                  | 4                                                                  | 4                                                                  |
| 1                                                                  | 4                                                                  | 1                                                                  |
| 1                                                                  | 1                                                                  | 3                                                                  |
| 1                                                                  | 1                                                                  | 3                                                                  |
| 4                                                                  | 5                                                                  | 4                                                                  |
| 1                                                                  | 1                                                                  | 3                                                                  |
| 3                                                                  | 5                                                                  | 3                                                                  |
| 5                                                                  | 5                                                                  | 5                                                                  |
| 3                                                                  | 4                                                                  | 4                                                                  |
| 5                                                                  | 5                                                                  | 5                                                                  |
| 1                                                                  | 3                                                                  | 1                                                                  |
| 3                                                                  | 4                                                                  | 5                                                                  |
| 2                                                                  | 2                                                                  | 2                                                                  |
| 1                                                                  | 1                                                                  | 1                                                                  |
| 3                                                                  | 4                                                                  | 4                                                                  |
| 1                                                                  | 5                                                                  | 5                                                                  |
| 5                                                                  | 5                                                                  | 5                                                                  |
| 5                                                                  | 5                                                                  | 4                                                                  |
| 4                                                                  | 5                                                                  | 5                                                                  |
| 3                                                                  | 4                                                                  | 4                                                                  |
| 1                                                                  | 4                                                                  | 4                                                                  |
| 2                                                                  | 2                                                                  | 1                                                                  |
| 3                                                                  | 4                                                                  | 3                                                                  |
| 4                                                                  | 4                                                                  | 4                                                                  |
| 4                                                                  | 4                                                                  | 4                                                                  |
| 2                                                                  | 3                                                                  | 3                                                                  |
| 5                                                                  | 5                                                                  | 5                                                                  |
| 3                                                                  | 5                                                                  | 4                                                                  |
| 1                                                                  | 2                                                                  | 2                                                                  |
| 3                                                                  | 3                                                                  | 4                                                                  |
| 3                                                                  | 4                                                                  | 3                                                                  |
| 1                                                                  | 3                                                                  | 5                                                                  |

|  |   |   |   |
|--|---|---|---|
|  | 5 | 5 | 5 |
|  | 2 | 3 | 5 |
|  | 3 | 3 | 3 |
|  | 3 | 3 | 4 |
|  | 1 | 1 | 1 |
|  | 5 | 5 | 5 |
|  | 4 | 5 | 5 |
|  | 4 | 4 | 4 |
|  | 3 | 3 | 3 |
|  | 5 | 5 | 5 |
|  | 3 | 5 | 4 |
|  | 3 | 5 | 4 |
|  | 3 | 4 | 3 |
|  | 5 | 5 | 5 |
|  | 1 | 2 | 4 |
|  | 5 | 5 | 5 |
|  | 4 | 4 | 4 |
|  | 1 | 2 | 2 |
|  | 1 | 1 | 3 |
|  | 2 | 2 | 2 |
|  | 2 | 2 | 3 |
|  | 2 | 3 | 3 |
|  | 4 | 4 | 4 |
|  | 3 | 3 | 4 |
|  | 4 | 4 | 4 |
|  | 2 | 2 | 4 |
|  | 1 | 3 | 1 |
|  | 1 | 4 | 3 |
|  | 1 | 5 | 2 |
|  | 1 | 5 | 2 |
|  | 4 | 4 | 3 |
|  | 4 | 4 | 2 |
|  | 3 | 3 | 3 |
|  | 3 | 3 | 3 |
|  | 3 | 3 | 3 |
|  | 3 | 2 | 2 |
|  | 2 | 4 | 2 |
|  | 2 | 4 | 5 |
|  | 4 | 4 | 4 |
|  | 2 | 4 | 4 |
|  | 1 | 5 | 4 |
|  | 1 | 3 | 4 |
|  | 4 | 4 | 4 |
|  | 4 | 4 | 3 |
|  | 2 | 2 | 3 |
|  | 2 | 4 | 4 |
|  | 4 | 4 | 4 |
|  | 2 | 2 | 2 |

|  |   |   |   |
|--|---|---|---|
|  | 4 | 4 | 4 |
|  | 3 | 5 | 4 |
|  | 5 | 5 | 5 |
|  | 2 | 4 | 3 |
|  | 3 | 4 | 4 |
|  | 4 | 3 | 4 |
|  | 3 | 3 | 3 |
|  | 3 | 5 | 5 |
|  | 4 | 5 | 4 |
|  | 3 | 3 | 3 |
|  | 4 | 4 | 3 |
|  | 4 | 4 | 4 |
|  | 2 | 3 | 4 |
|  | 4 | 4 | 4 |
|  | 2 | 3 | 4 |
|  | 4 | 4 | 4 |
|  | 2 | 4 | 2 |
|  | 1 | 4 | 3 |
|  | 2 | 3 | 4 |
|  | 4 | 3 | 4 |
|  | 3 | 4 | 4 |
|  | 4 | 5 | 5 |
|  | 4 | 5 | 4 |
|  | 5 | 5 | 5 |
|  | 4 | 5 | 5 |
|  | 2 | 2 | 2 |
|  | 5 | 5 | 5 |
|  | 4 | 4 | 5 |
|  | 3 | 3 | 3 |
|  | 1 | 4 | 3 |
|  | 3 | 4 | 1 |
|  | 3 | 3 | 4 |
|  | 4 | 4 | 4 |
|  | 4 | 5 | 4 |
|  | 3 | 4 | 4 |
|  | 1 | 3 | 4 |
|  | 2 | 2 | 2 |
|  | 1 | 1 | 1 |
|  | 2 | 5 | 1 |
|  | 2 | 3 | 4 |
|  | 1 | 5 | 1 |
|  | 1 | 3 | 3 |
|  | 3 | 3 | 4 |
|  | 3 | 3 | 2 |
|  | 2 | 4 | 3 |
|  | 5 | 5 | 3 |
|  | 3 | 3 | 4 |
|  | 3 | 4 | 3 |

|  |   |   |   |
|--|---|---|---|
|  | 3 | 3 | 4 |
|  | 1 | 4 | 3 |
|  | 3 | 3 | 3 |
|  | 3 | 1 | 1 |
|  | 1 | 5 | 1 |
|  | 4 | 5 | 4 |
|  | 1 | 1 | 1 |
|  | 1 | 5 | 4 |
|  | 2 | 1 | 1 |
|  | 4 | 4 | 4 |
|  | 1 | 3 | 2 |
|  | 1 | 2 | 3 |
|  | 4 | 4 | 4 |
|  | 5 | 5 | 3 |
|  | 1 | 1 | 3 |
|  | 5 | 5 | 5 |
|  | 1 | 3 | 1 |
|  | 5 | 5 | 4 |
|  | 3 | 4 | 4 |
|  | 5 | 5 | 5 |
|  | 3 | 4 | 3 |
|  | 3 | 5 | 3 |
|  | 3 | 5 | 3 |
|  | 1 | 3 | 3 |
|  | 5 | 5 | 5 |
|  | 3 | 3 | 4 |
|  | 3 | 5 | 3 |
|  | 2 | 2 | 1 |
|  | 4 | 5 | 5 |
|  | 3 | 4 | 4 |
|  | 3 | 4 | 3 |
|  | 5 | 5 | 5 |
|  | 1 | 3 | 4 |
|  | 4 | 4 | 4 |
|  | 2 | 1 | 1 |
|  | 5 | 5 | 5 |
|  | 5 | 4 | 5 |
|  | 5 | 4 | 5 |
|  | 4 | 5 | 4 |
|  | 1 | 3 | 3 |
|  | 3 | 4 | 4 |
|  | 1 | 2 | 2 |
|  | 3 | 4 | 4 |
|  | 4 | 3 | 4 |
|  | 2 | 2 | 2 |
|  | 1 | 1 | 5 |
|  | 5 | 5 | 5 |
|  | 4 | 4 | 4 |



|    |    |    |
|----|----|----|
| 3  | 5  | 4  |
| 3  | 5  | 2  |
| 4  | 5  | 4  |
| 1  | 1  | 1  |
| 4  | 4  | 4  |
| 3  | 4  | 4  |
| 5  | 5  | 3  |
| 3  | 5  | 5  |
| 3  | 5  | 3  |
| 2  | 1  | 1  |
| 5  | 5  | 5  |
| 3  | 2  | 3  |
| 45 | 17 | 21 |
| 33 | 19 | 23 |
| 56 | 45 | 46 |
| 41 | 61 | 73 |
| 28 | 61 | 40 |



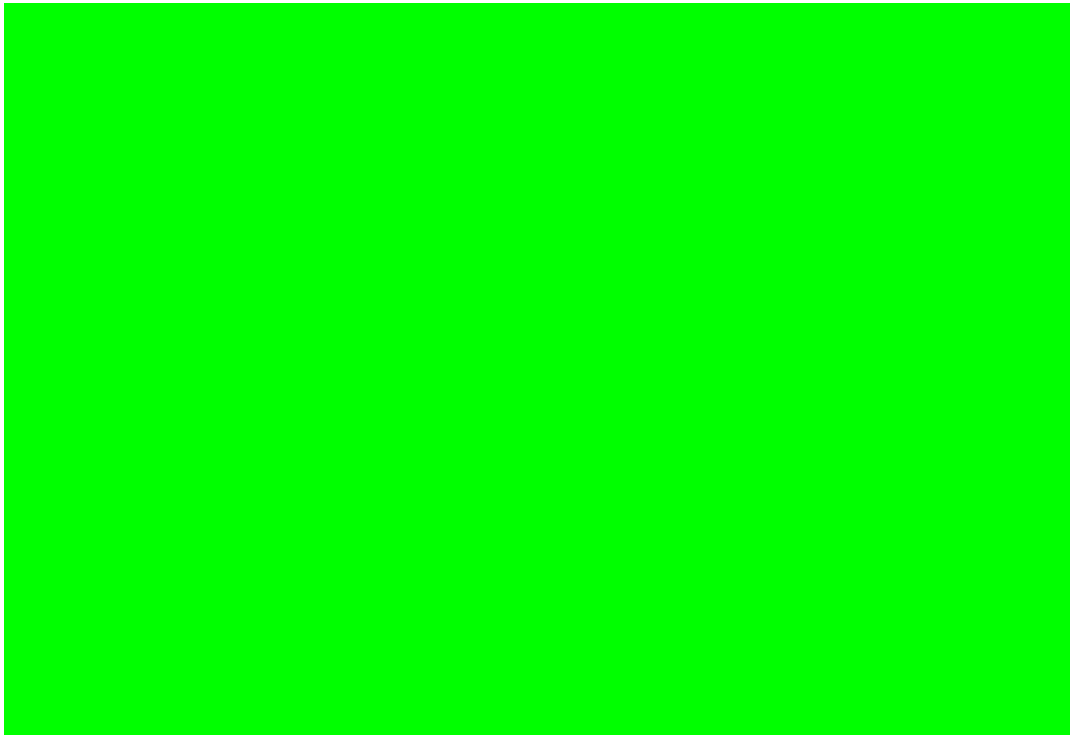

| Other, please specify | In your opinion, which channel would be the n | In your opinion, which c |
|-----------------------|-----------------------------------------------|--------------------------|
|                       | 5                                             | 5                        |
|                       | 3                                             | 4                        |
|                       | 5                                             | 5                        |
|                       | 2                                             | 1                        |
|                       | 3                                             | 4                        |
|                       | 5                                             | 5                        |
|                       | 4                                             | 4                        |
|                       | 4                                             | 2                        |
|                       | 5                                             | 4                        |
|                       | 3                                             | 3                        |
|                       | 3                                             | 3                        |
|                       | 5                                             | 5                        |
|                       | 5                                             | 5                        |
|                       | 5                                             | 5                        |
|                       | 5                                             | 5                        |
|                       | 4                                             | 4                        |
|                       | 4                                             | 4                        |
|                       | 5                                             | 3                        |
|                       | 5                                             | 3                        |
|                       | 5                                             | 5                        |
|                       | 5                                             | 5                        |
|                       | 5                                             | 4                        |
|                       | 5                                             | 5                        |
|                       | 4                                             | 4                        |
|                       | 5                                             | 5                        |
|                       | 5                                             | 5                        |
|                       | 5                                             | 4                        |
|                       | 5                                             | 3                        |
|                       | 5                                             | 5                        |
|                       | 5                                             | 5                        |
|                       | 5                                             | 5                        |
|                       | 5                                             | 5                        |
|                       | 5                                             | 5                        |
|                       | 4                                             | 4                        |
|                       | 5                                             | 5                        |
|                       | 5                                             | 5                        |
|                       | 4                                             | 4                        |
|                       | 1                                             | 3                        |
|                       | 5                                             | 5                        |
|                       | 4                                             | 4                        |
|                       | 4                                             | 4                        |
|                       | 3                                             | 3                        |
|                       | 5                                             | 5                        |
|                       | 5                                             | 5                        |
|                       | 4                                             | 3                        |
|                       | 5                                             | 4                        |
|                       | 5                                             | 3                        |
|                       | 5                                             | 5                        |

|                          |   |   |
|--------------------------|---|---|
| Everyone on earth        | 5 | 5 |
|                          | 4 | 4 |
|                          | 4 | 4 |
|                          | 4 | 4 |
|                          | 5 | 5 |
|                          | 5 | 5 |
|                          | 5 | 4 |
|                          | 4 | 4 |
| just everybody           | 5 | 3 |
|                          | 4 | 3 |
|                          | 5 | 5 |
|                          | 5 | 5 |
|                          | 3 | 3 |
|                          | 5 | 5 |
|                          | 5 | 5 |
|                          | 5 | 3 |
| We are all responsible   | 5 | 5 |
|                          | 5 | 4 |
|                          | 4 | 3 |
| The industries, increase | 5 | 3 |
|                          | 5 | 5 |
|                          | 5 | 5 |
|                          | 5 | 5 |
|                          | 4 | 5 |
|                          | 5 | 5 |
|                          | 5 | 5 |
|                          | 4 | 4 |
|                          | 5 | 4 |
|                          | 5 | 5 |
|                          | 4 | 4 |
|                          | 5 | 5 |
|                          | 5 | 5 |
|                          | 4 | 4 |
|                          | 4 | 4 |
|                          | 4 | 4 |
|                          | 5 | 5 |
|                          | 5 | 5 |
|                          | 3 | 4 |
|                          | 5 | 4 |
| "Extremists"             | 4 | 4 |
|                          | 4 | 4 |
|                          | 5 | 5 |
|                          | 4 | 4 |
|                          | 5 | 4 |
|                          | 5 | 5 |
|                          | 4 | 4 |
|                          | 3 | 3 |
|                          | 3 | 2 |
|                          | 3 | 4 |
|                          | 4 | 4 |

Society as a collective c

|  |   |   |
|--|---|---|
|  | 5 | 2 |
|  | 5 | 5 |
|  | 5 | 5 |
|  | 3 | 3 |
|  | 4 | 4 |
|  | 4 | 4 |
|  | 5 | 4 |
|  | 4 | 4 |
|  | 5 | 5 |
|  | 4 | 4 |
|  | 5 | 5 |
|  | 4 | 4 |
|  | 5 | 5 |
|  | 5 | 5 |
|  | 4 | 4 |
|  | 4 | 4 |
|  | 4 | 4 |
|  | 4 | 4 |
|  | 5 | 5 |
|  | 4 | 3 |
|  | 5 | 4 |
|  | 5 | 5 |
|  | 4 | 4 |
|  | 5 | 5 |
|  | 4 | 4 |
|  | 5 | 5 |
|  | 5 | 5 |
|  | 4 | 4 |
|  | 5 | 4 |
|  | 5 | 5 |
|  | 4 | 4 |
|  | 4 | 4 |
|  | 5 | 4 |
|  | 3 | 4 |
|  | 5 | 4 |
|  | 5 | 5 |
|  | 4 | 4 |
|  | 5 | 4 |
|  | 5 | 4 |
|  | 5 | 5 |
|  | 4 | 4 |
|  | 4 | 4 |
|  | 4 | 4 |
|  | 5 | 5 |
|  | 5 | 5 |
|  | 4 | 4 |
|  | 4 | 4 |
|  | 3 | 3 |
|  | 5 | 5 |
|  | 5 | 5 |
|  | 5 | 4 |

|                        |  |   |   |
|------------------------|--|---|---|
|                        |  | 4 | 4 |
|                        |  | 5 | 5 |
|                        |  | 5 | 5 |
|                        |  | 4 | 4 |
|                        |  | 5 | 5 |
|                        |  | 5 | 5 |
|                        |  | 5 | 5 |
|                        |  | 5 | 5 |
|                        |  | 5 | 5 |
|                        |  | 5 | 5 |
|                        |  | 4 | 4 |
|                        |  | 4 | 4 |
|                        |  | 1 | 5 |
|                        |  | 5 | 4 |
|                        |  | 4 | 3 |
|                        |  | 5 | 5 |
|                        |  | 5 | 4 |
|                        |  | 5 | 5 |
|                        |  | 5 | 5 |
| Todo el mundo. Es un p |  | 4 | 4 |
|                        |  | 5 | 4 |
|                        |  | 4 | 4 |
| n/a                    |  | 5 | 5 |
|                        |  | 5 | 5 |
|                        |  | 5 | 5 |
|                        |  | 5 | 5 |
|                        |  | 5 | 5 |
|                        |  | 4 | 4 |
|                        |  | 4 | 4 |
|                        |  | 5 | 5 |
|                        |  | 3 | 4 |
|                        |  | 5 | 5 |
|                        |  | 5 | 5 |
|                        |  | 5 | 5 |
|                        |  | 4 | 4 |
| We ALL are responsibl  |  | 5 | 4 |
|                        |  | 5 | 5 |
|                        |  | 5 | 5 |
|                        |  | 5 | 5 |
|                        |  | 5 | 5 |
|                        |  | 5 | 5 |
|                        |  | 4 | 4 |
|                        |  | 4 | 4 |
|                        |  | 5 | 5 |
|                        |  | 5 | 5 |
|                        |  | 5 | 5 |
|                        |  | 5 | 5 |
|                        |  | 5 | 4 |





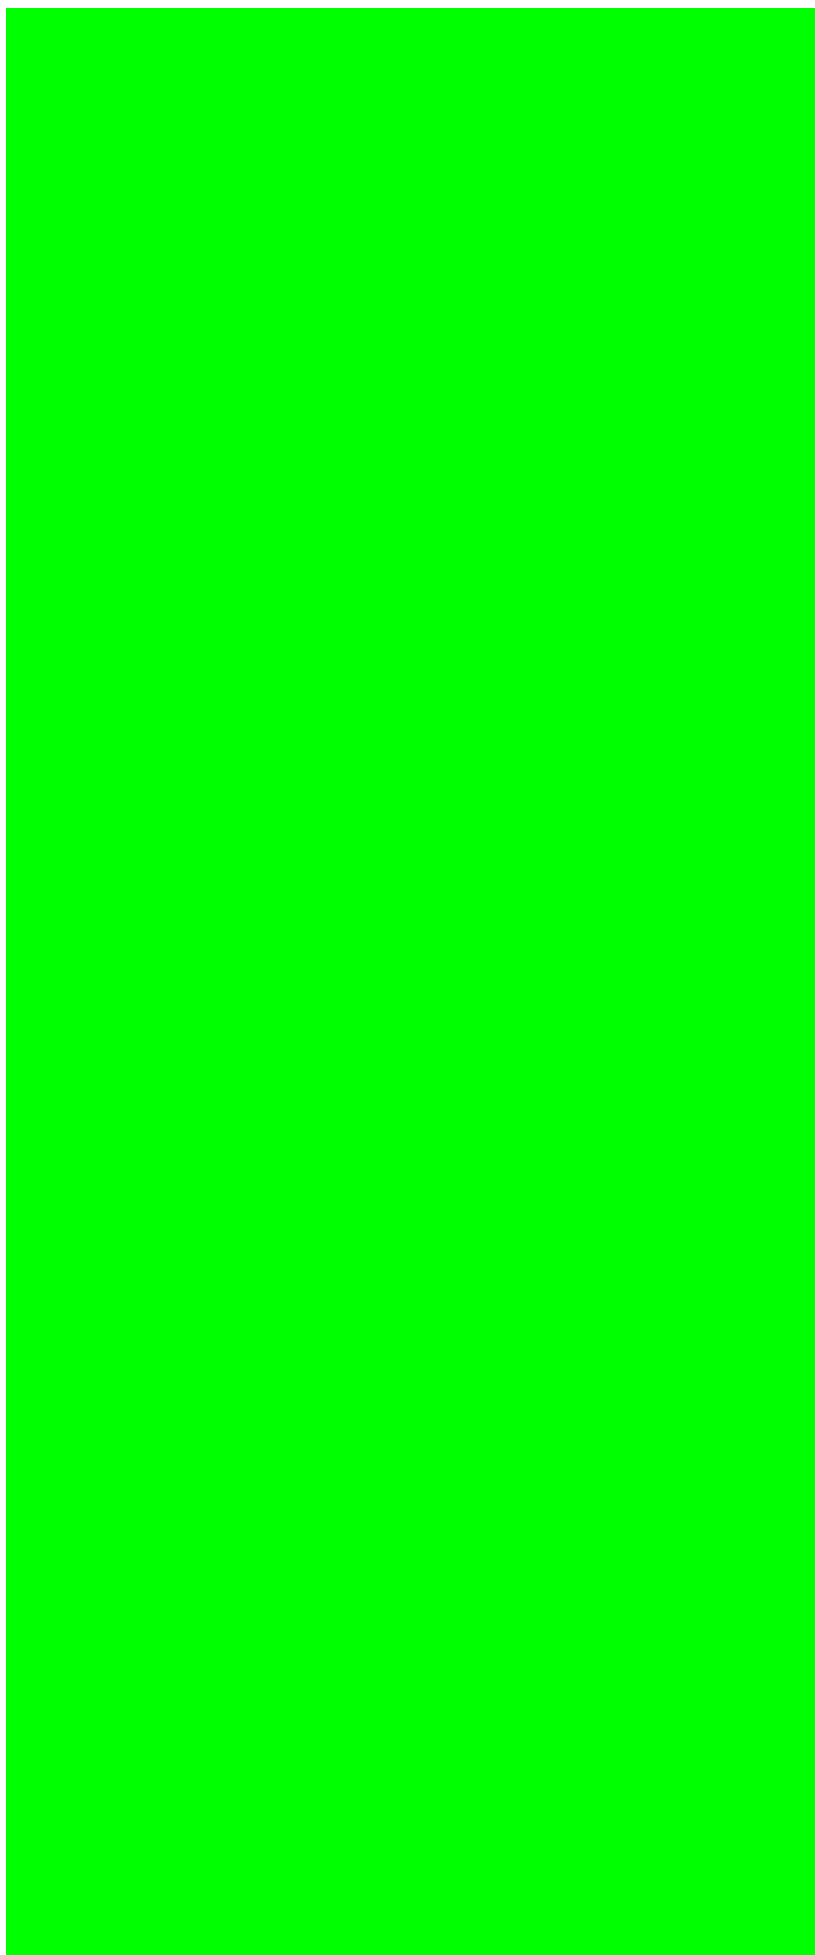

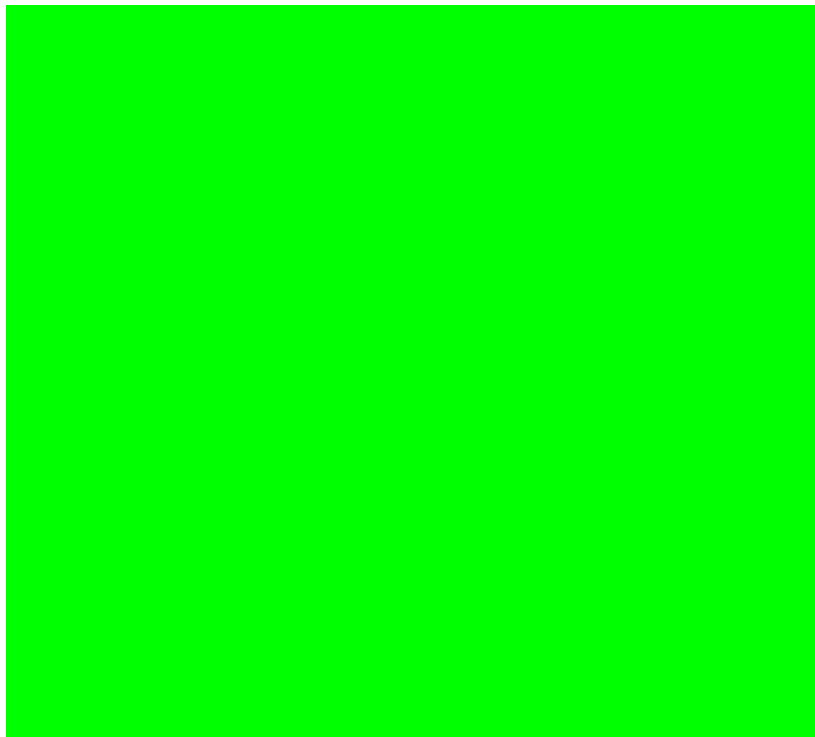

| In your opinion, which c | In your opinion, which channel would be | In your opinion, which c | In your opinion, which c |
|--------------------------|-----------------------------------------|--------------------------|--------------------------|
| 5                        | 3                                       | 5                        | 4                        |
| 4                        | 1                                       | 1                        | 2                        |
| 5                        | 5                                       | 5                        | 5                        |
| 2                        | 3                                       | 1                        | 4                        |
| 4                        | 2                                       | 3                        | 4                        |
| 5                        | 4                                       | 5                        | 5                        |
| 5                        | 5                                       | 5                        | 5                        |
| 5                        | 2                                       | 5                        | 3                        |
| 4                        | 3                                       | 4                        | 3                        |
| 3                        | 2                                       | 3                        | 2                        |
| 3                        | 2                                       | 4                        | 2                        |
| 5                        | 1                                       | 5                        | 2                        |
| 5                        | 3                                       | 5                        | 3                        |
| 4                        | 5                                       | 5                        | 5                        |
| 5                        | 1                                       | 5                        | 3                        |
| 4                        | 2                                       | 4                        | 4                        |
| 4                        | 1                                       | 4                        | 3                        |
| 5                        | 1                                       | 4                        | 2                        |
| 5                        | 1                                       | 4                        | 2                        |
| 5                        | 5                                       | 5                        | 5                        |
| 5                        | 5                                       | 5                        | 5                        |
| 5                        | 3                                       | 4                        | 3                        |
| 5                        | 5                                       | 5                        | 5                        |
| 4                        | 3                                       | 4                        | 4                        |
| 5                        | 5                                       | 5                        | 5                        |
| 5                        | 1                                       | 5                        | 5                        |
| 4                        | 3                                       | 4                        | 3                        |
| 3                        | 2                                       | 2                        | 3                        |
| 5                        | 2                                       | 5                        | 2                        |
| 5                        | 1                                       | 4                        | 4                        |
| 5                        | 1                                       | 5                        | 4                        |
| 5                        | 5                                       | 5                        | 5                        |
| 5                        | 4                                       | 4                        | 4                        |
| 5                        | 3                                       | 5                        | 3                        |
| 5                        | 2                                       | 4                        | 4                        |
| 4                        | 1                                       | 5                        | 4                        |
| 1                        | 1                                       | 1                        | 1                        |
| 4                        | 2                                       | 4                        | 4                        |
| 4                        | 3                                       | 4                        | 4                        |
| 4                        | 4                                       | 5                        | 4                        |
| 3                        | 1                                       | 4                        | 4                        |
| 5                        | 1                                       | 5                        | 2                        |
| 5                        | 4                                       | 4                        | 4                        |
| 3                        | 1                                       | 4                        | 3                        |
| 3                        | 1                                       | 4                        | 3                        |
| 4                        | 3                                       | 3                        | 5                        |
| 5                        | 1                                       | 5                        | 5                        |

|   |   |   |   |
|---|---|---|---|
| 5 | 5 | 5 | 5 |
| 4 | 2 | 3 | 2 |
| 4 | 4 | 3 | 4 |
| 4 | 3 | 4 | 3 |
| 4 | 1 | 4 | 3 |
| 5 | 5 | 5 | 5 |
| 5 | 3 | 5 | 4 |
| 4 | 4 | 4 | 4 |
| 3 | 4 | 4 | 2 |
| 3 | 3 | 5 | 3 |
| 5 | 3 | 5 | 4 |
| 5 | 3 | 5 | 4 |
| 4 | 4 | 3 | 4 |
| 5 | 5 | 5 | 5 |
| 5 | 1 | 3 | 3 |
| 4 | 5 | 4 | 5 |
| 5 | 1 | 4 | 1 |
| 5 | 3 | 5 | 3 |
| 4 | 1 | 1 | 4 |
| 5 | 4 | 5 | 3 |
| 4 | 3 | 4 | 4 |
| 5 | 2 | 5 | 4 |
| 5 | 4 | 5 | 5 |
| 4 | 4 | 3 | 4 |
| 5 | 5 | 5 | 5 |
| 5 | 5 | 5 | 5 |
| 3 | 1 | 3 | 3 |
| 4 | 1 | 4 | 4 |
| 5 | 3 | 5 | 3 |
| 5 | 3 | 5 | 3 |
| 2 | 2 | 1 | 2 |
| 3 | 4 | 4 | 4 |
| 4 | 3 | 4 | 3 |
| 5 | 4 | 4 | 5 |
| 3 | 4 | 5 | 4 |
| 3 | 2 | 3 | 3 |
| 4 | 3 | 3 | 3 |
| 4 | 2 | 4 | 3 |
| 4 | 3 | 4 | 4 |
| 5 | 2 | 5 | 5 |
| 5 | 1 | 4 | 3 |
| 4 | 4 | 2 | 4 |
| 5 | 5 | 5 | 5 |
| 3 | 5 | 4 | 5 |
| 4 | 3 | 4 | 3 |
| 3 | 1 | 4 | 4 |
| 3 | 3 | 3 | 3 |
| 2 | 4 | 4 | 5 |

|   |   |   |   |
|---|---|---|---|
| 3 | 5 | 4 | 3 |
| 5 | 4 | 5 | 3 |
| 5 | 3 | 4 | 4 |
| 4 | 4 | 5 | 5 |
| 4 | 4 | 4 | 4 |
| 4 | 4 | 4 | 4 |
| 4 | 4 | 5 | 4 |
| 4 | 2 | 4 | 2 |
| 5 | 3 | 4 | 4 |
| 4 | 3 | 3 | 4 |
| 4 | 4 | 2 | 4 |
| 5 | 5 | 5 | 5 |
| 4 | 2 | 3 | 3 |
| 4 | 4 | 4 | 4 |
| 4 | 4 | 4 | 4 |
| 4 | 3 | 3 | 4 |
| 5 | 5 | 5 | 5 |
| 4 | 1 | 4 | 5 |
| 3 | 2 | 4 | 3 |
| 5 | 4 | 5 | 3 |
| 4 | 3 | 5 | 4 |
| 5 | 5 | 5 | 4 |
| 4 | 3 | 4 | 4 |
| 5 | 5 | 5 | 4 |
| 4 | 4 | 5 | 5 |
| 4 | 4 | 4 | 4 |
| 5 | 5 | 3 | 5 |
| 4 | 3 | 3 | 3 |
| 4 | 3 | 4 | 3 |
| 3 | 1 | 3 | 4 |
| 3 | 1 | 5 | 5 |
| 5 | 4 | 5 | 5 |
| 5 | 1 | 3 | 5 |
| 5 | 5 | 5 | 5 |
| 4 | 3 | 4 | 3 |
| 4 | 2 | 4 | 4 |
| 4 | 3 | 3 | 3 |
| 3 | 1 | 5 | 5 |
| 5 | 2 | 5 | 3 |
| 4 | 4 | 3 | 5 |
| 5 | 1 | 4 | 1 |
| 5 | 1 | 5 | 5 |
| 3 | 4 | 3 | 4 |
| 4 | 2 | 3 | 2 |
| 3 | 2 | 4 | 3 |
| 5 | 4 | 4 | 4 |
| 5 | 5 | 5 | 5 |
| 5 | 2 | 5 | 3 |

|   |   |   |   |
|---|---|---|---|
| 4 | 5 | 4 | 4 |
| 5 | 4 | 5 | 5 |
| 4 | 3 | 4 | 2 |
| 4 | 2 | 5 | 5 |
| 5 | 5 | 5 | 5 |
| 4 | 3 | 4 | 3 |
| 1 | 1 | 1 | 4 |
| 5 | 1 | 3 | 4 |
| 4 | 2 | 2 | 1 |
| 5 | 5 | 5 | 5 |
| 5 | 2 | 5 | 3 |
| 5 | 1 | 4 | 2 |
| 5 | 4 | 5 | 4 |
| 5 | 4 | 5 | 5 |
| 3 | 2 | 2 | 3 |
| 5 | 5 | 5 | 5 |
| 4 | 1 | 4 | 3 |
| 5 | 3 | 5 | 3 |
| 5 | 4 | 5 | 4 |
| 4 | 4 | 4 | 5 |
| 4 | 3 | 4 | 3 |
| 3 | 1 | 3 | 2 |
| 5 | 5 | 5 | 5 |
| 3 | 4 | 4 | 4 |
| 5 | 5 | 5 | 5 |
| 4 | 3 | 5 | 5 |
| 3 | 3 | 5 | 3 |
| 3 | 3 | 4 | 5 |
| 4 | 5 | 5 | 5 |
| 5 | 4 | 5 | 4 |
| 5 | 2 | 5 | 5 |
| 5 | 5 | 5 | 5 |
| 5 | 1 | 5 | 5 |
| 5 | 4 | 4 | 4 |
| 4 | 3 | 3 | 4 |
| 4 | 4 | 4 | 4 |
| 5 | 3 | 4 | 4 |
| 5 | 3 | 4 | 4 |
| 5 | 3 | 5 | 5 |
| 5 | 1 | 5 | 1 |
| 5 | 5 | 5 | 3 |
| 3 | 4 | 4 | 5 |
| 4 | 2 | 4 | 3 |
| 5 | 5 | 3 | 3 |
| 5 | 3 | 3 | 3 |
| 5 | 1 | 5 | 2 |
| 5 | 5 | 5 | 5 |
| 4 | 3 | 4 | 4 |

|     |    |    |    |
|-----|----|----|----|
| 5   | 4  | 5  | 5  |
| 4   | 3  | 4  | 3  |
| 5   | 5  | 5  | 5  |
| 5   | 3  | 5  | 4  |
| 4   | 4  | 3  | 4  |
| 4   | 4  | 5  | 3  |
| 5   | 4  | 4  | 4  |
| 5   | 2  | 5  | 5  |
| 5   | 3  | 5  | 5  |
| 5   | 1  | 5  | 4  |
| 5   | 1  | 5  | 4  |
| 5   | 3  | 5  | 4  |
| 2   | 41 | 6  | 5  |
| 3   | 30 | 5  | 17 |
| 28  | 51 | 29 | 52 |
| 70  | 45 | 72 | 69 |
| 100 | 36 | 91 | 60 |





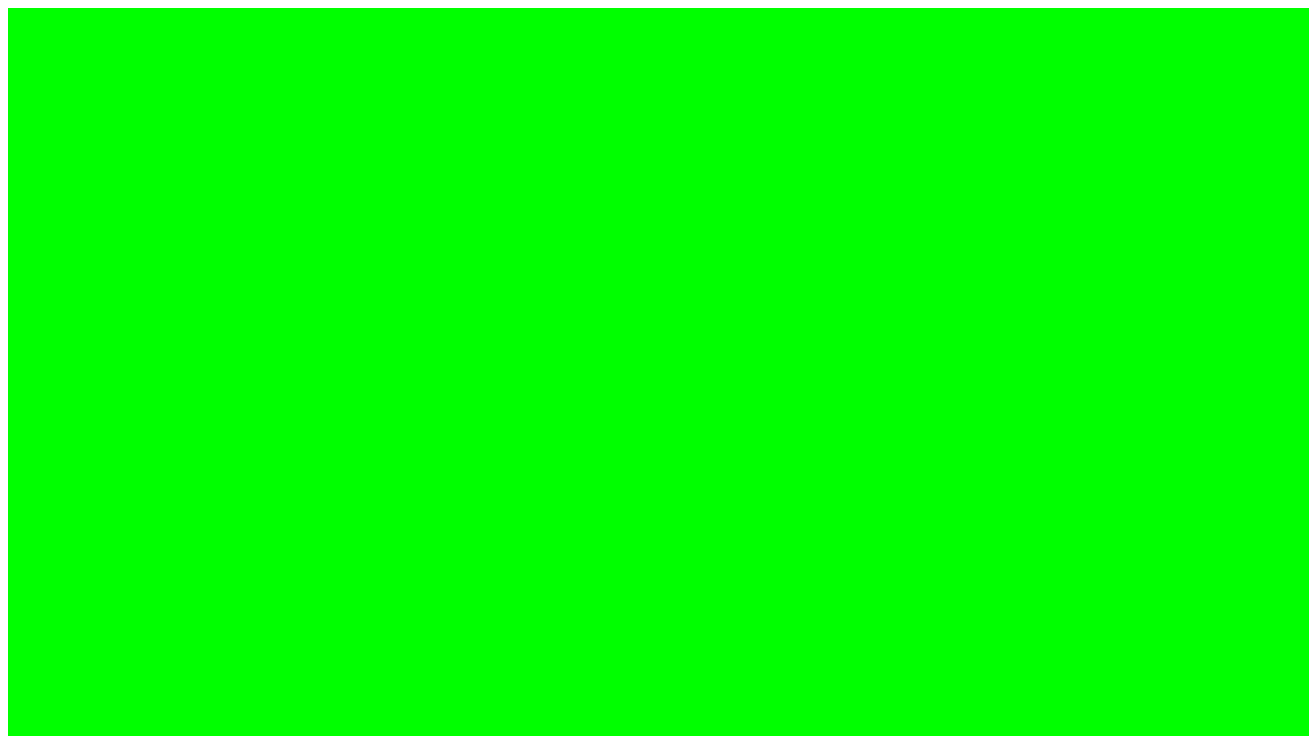

In your opinion, which c In your opinion, which c In your opinion, which c Other, please specify

|   |   |   |
|---|---|---|
| 5 | 5 | 5 |
| 2 | 2 | 1 |
| 5 | 5 | 5 |
| 3 | 3 | 2 |
| 4 | 4 | 4 |
| 5 | 5 | 5 |
| 4 | 4 | 5 |
| 4 | 3 | 5 |
| 4 | 4 | 4 |
| 2 | 2 | 3 |
| 1 | 1 | 1 |
| 4 | 3 | 5 |
| 3 | 3 | 5 |
| 5 | 4 | 4 |
| 3 | 3 | 3 |
| 4 | 4 | 4 |
| 3 | 4 | 4 |
| 4 | 1 | 5 |
| 4 | 1 | 5 |
| 5 | 5 | 5 |
| 5 | 5 | 5 |
| 3 | 3 | 4 |
| 5 | 5 | 5 |
| 4 | 4 | 4 |
| 5 | 5 | 5 |
| 5 | 5 | 5 |
| 5 | 4 | 4 |
| 3 | 4 | 5 |
| 2 | 2 | 4 |
| 3 | 2 | 3 |
| 3 | 3 | 5 |
| 5 | 5 | 5 |
| 3 | 4 | 4 |
| 5 | 3 | 3 |
| 4 | 4 | 5 |
| 4 | 4 | 4 |
| 1 | 1 | 1 |
| 3 | 2 | 4 |
| 4 | 3 | 4 |
| 4 | 4 | 4 |
| 3 | 2 | 4 |
| 2 | 5 | 3 |
| 4 | 4 | 5 |
| 3 | 3 | 4 |
| 5 | 3 | 4 |
| 4 | 3 | 4 |
| 5 | 5 | 5 |

|   |   |                           |
|---|---|---------------------------|
| 5 | 5 | 5                         |
| 2 | 4 | 4                         |
| 4 | 4 | 4                         |
| 4 | 4 | 4                         |
| 4 | 4 | 4                         |
| 5 | 5 | 5                         |
| 5 | 5 | 5                         |
| 4 | 4 | 4                         |
| 3 | 1 | 2                         |
| 5 | 5 | 4                         |
| 4 | 4 | 3                         |
| 4 | 4 | 3                         |
| 3 | 3 | 3                         |
| 5 | 4 | 5                         |
| 4 | 1 | 2                         |
| 4 | 3 | 4                         |
| 3 | 3 | 3                         |
| 4 | 2 | 5                         |
| 2 | 4 | 4 School curriculum       |
| 3 | 4 | 3 For me, the best chane  |
| 4 | 4 | 5                         |
| 3 | 3 | 5                         |
| 5 | 5 | 5                         |
| 3 | 4 | 4                         |
| 5 | 4 | 5                         |
| 5 | 5 | 5                         |
| 2 | 2 | 4                         |
| 3 | 4 | 3                         |
| 4 | 4 | 4                         |
| 4 | 4 | 4                         |
| 2 | 5 | 3                         |
| 4 | 4 | 3                         |
| 3 | 3 | 4                         |
| 4 | 4 | 4                         |
| 4 | 5 | 5 Schooling/educational g |
| 3 | 2 | 3                         |
| 5 | 3 | 4                         |
| 3 | 3 | 4                         |
| 3 | 3 | 4                         |
| 5 | 5 | 5                         |
| 5 | 5 | 4                         |
| 4 | 4 | 2                         |
| 5 | 5 | 5                         |
| 4 | 4 | 4                         |
| 3 | 4 | 4                         |
| 3 | 3 | 4                         |
| 3 | 3 | 3                         |
| 2 | 1 | 4 blogs by trusted public |

|   |   |   |
|---|---|---|
| 4 | 3 | 5 |
| 3 | 3 | 4 |
| 4 | 4 | 4 |
| 3 | 5 | 5 |
| 4 | 4 | 4 |
| 4 | 4 | 4 |
| 3 | 3 | 4 |
| 3 | 3 | 4 |
| 5 | 5 | 5 |
| 3 | 3 | 3 |
| 4 | 4 | 4 |
| 5 | 5 | 5 |
| 3 | 3 | 3 |
| 4 | 4 | 4 |
| 4 | 4 | 4 |
| 4 | 4 | 4 |
| 5 | 5 | 5 |
| 5 | 5 | 5 |
| 3 | 3 | 4 |
| 4 | 5 | 5 |
| 4 | 4 | 5 |
| 5 | 5 | 5 |
| 4 | 4 | 4 |
| 4 | 4 | 5 |
| 5 | 4 | 5 |
| 4 | 4 | 4 |
| 4 | 4 | 5 |
| 4 | 4 | 5 |
| 3 | 3 | 4 |
| 3 | 2 | 3 |
| 5 | 5 | 5 |
| 4 | 4 | 4 |
| 5 | 3 | 5 |
| 5 | 5 | 5 |
| 3 | 3 | 4 |
| 4 | 4 | 4 |
| 1 | 1 | 2 |
| 5 | 5 | 3 |
| 3 | 2 | 3 |
| 4 | 4 | 4 |
| 2 | 2 | 4 |
| 5 | 5 | 5 |
| 4 | 2 | 2 |
| 2 | 2 | 4 |
| 3 | 2 | 4 |
| 4 | 4 | 4 |
| 5 | 5 | 5 |
| 2 | 2 | 5 |

|   |   |                             |
|---|---|-----------------------------|
| 3 | 2 | 4                           |
| 5 | 5 | 5                           |
| 2 | 2 | 2                           |
| 2 | 2 | 4                           |
| 4 | 4 | 5                           |
| 3 | 4 | 4                           |
| 1 | 1 | 1                           |
| 4 | 4 | 5                           |
| 1 | 1 | 1                           |
| 5 | 5 | 5                           |
| 4 | 3 | 5                           |
| 3 | 4 | 4                           |
| 4 | 5 | 4                           |
| 5 | 5 | 5                           |
| 1 | 1 | 3                           |
| 5 | 5 | 5                           |
| 3 | 3 | 3                           |
| 3 | 3 | 5                           |
| 5 | 5 | 5                           |
| 4 | 4 | 4                           |
| 4 | 3 | 4                           |
| 2 | 3 | 4                           |
| 5 | 5 | 5 n/a                       |
| 3 | 3 | 4                           |
| 5 | 5 | 5                           |
| 5 | 5 | 5                           |
| 3 | 4 | 4                           |
| 4 | 4 | 4                           |
| 5 | 5 | 5                           |
| 5 | 5 | 5                           |
| 4 | 4 | 5                           |
| 5 | 5 | 1                           |
| 5 | 5 | 5                           |
| 5 | 5 | 5                           |
| 3 | 3 | 3                           |
| 4 | 4 | 5                           |
| 4 | 5 | 4 SchoolBooks               |
| 4 | 5 | 4 SchoolBooks               |
| 2 | 4 | 5                           |
| 1 | 1 | 5                           |
| 5 | 5 | 5                           |
| 4 | 4 | 4                           |
| 3 | 3 | 4                           |
| 3 | 3 | 3 information built into ed |
| 3 | 3 | 2                           |
| 2 | 2 | 2                           |
| 5 | 5 | 5                           |
| 4 | 4 | 4                           |

|    |    |      |
|----|----|------|
| 5  | 5  | 5    |
| 2  | 4  | 5    |
| 5  | 5  | 5    |
| 4  | 5  | 5 No |
| 3  | 3  | 4    |
| 4  | 4  | 4    |
| 5  | 4  | 5    |
| 5  | 5  | 5    |
| 5  | 3  | 5    |
| 5  | 5  | 5    |
| 5  | 5  | 5    |
| 3  | 3  | 5    |
| 7  | 12 | 6    |
| 18 | 20 | 9    |
| 51 | 45 | 24   |
| 67 | 68 | 80   |
| 60 | 58 | 84   |

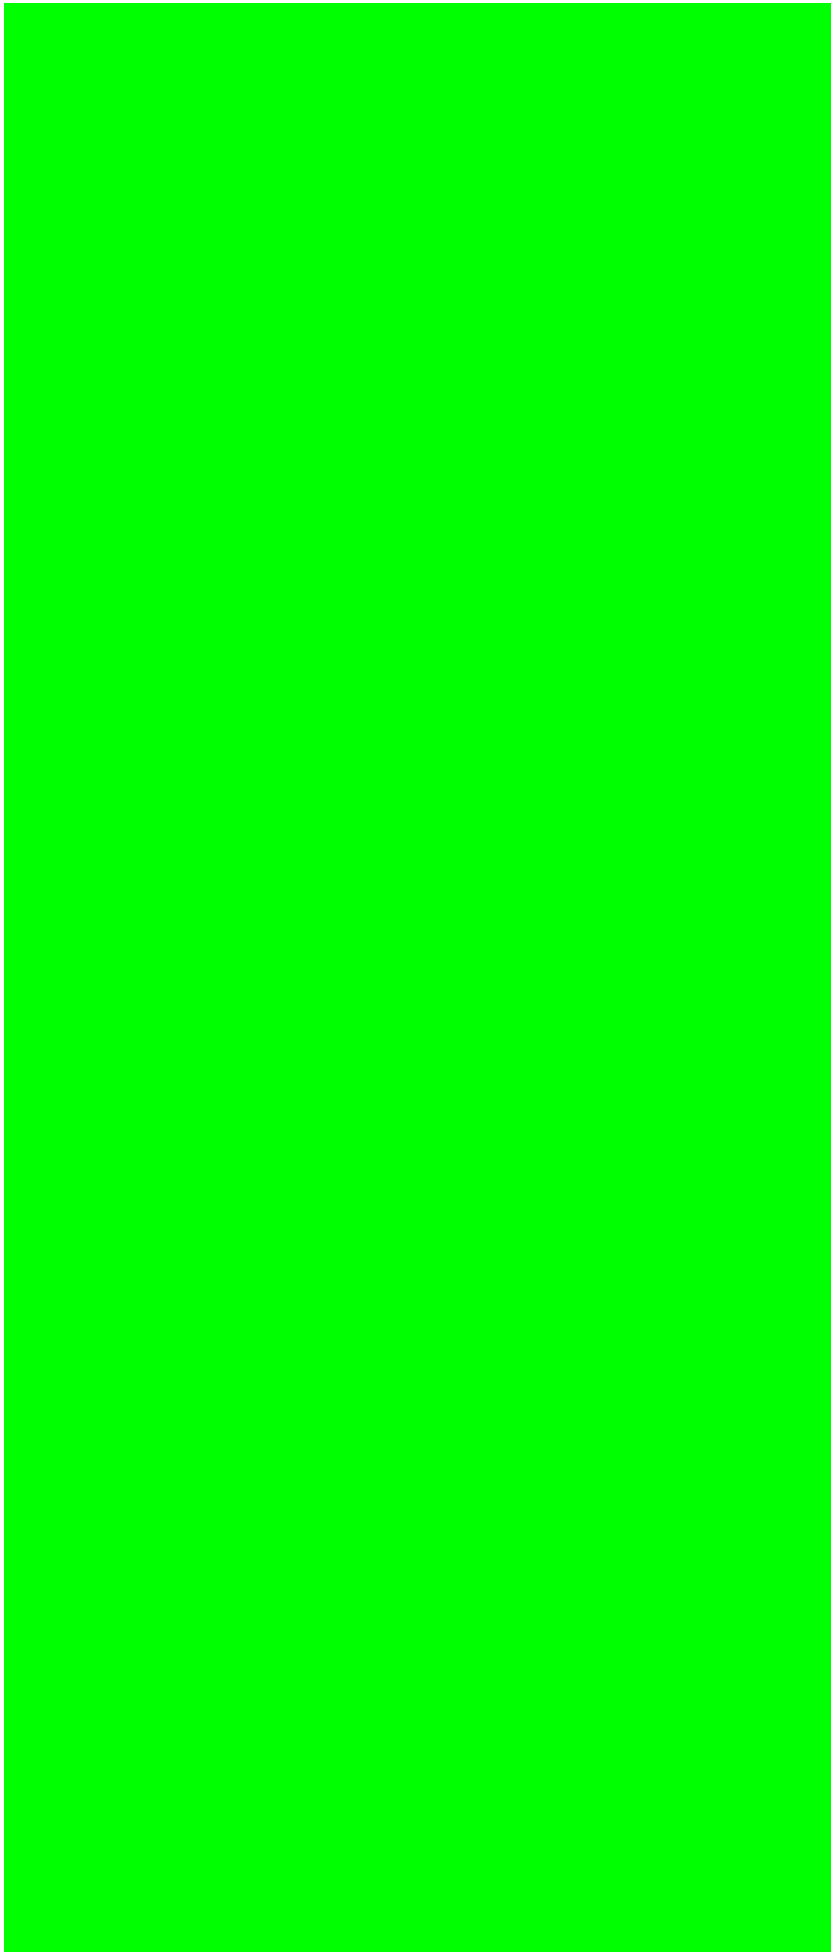





| What instrument (or res |
|-------------------------|-------------------------|-------------------------|-------------------------|
| 4                       | 5                       | 5                       | 5                       |
| 5                       | 4                       | 4                       | 5                       |
| 4                       | 5                       | 5                       | 5                       |
| 1                       | 2                       | 1                       | 1                       |
| 5                       | 4                       | 4                       | 4                       |
| 5                       | 5                       | 5                       | 5                       |
| 5                       | 5                       | 5                       | 5                       |
| 5                       | 4                       | 4                       | 3                       |
| 4                       | 3                       | 4                       | 4                       |
| 3                       | 3                       | 3                       | 3                       |
| 4                       | 3                       | 3                       | 4                       |
| 4                       | 5                       | 5                       | 5                       |
| 5                       | 5                       | 5                       | 5                       |
| 5                       | 4                       | 4                       | 5                       |
| 5                       | 5                       | 5                       | 5                       |
| 4                       | 4                       | 4                       | 4                       |
| 5                       | 5                       | 5                       | 5                       |
| 5                       | 2                       | 5                       | 5                       |
| 5                       | 2                       | 5                       | 5                       |
| 5                       | 5                       | 5                       | 5                       |
| 5                       | 3                       | 5                       | 5                       |
| 5                       | 4                       | 4                       | 5                       |
| 5                       | 5                       | 5                       | 5                       |
| 4                       | 4                       | 4                       | 4                       |
| 5                       | 5                       | 5                       | 5                       |
| 5                       | 5                       | 5                       | 5                       |
| 5                       | 4                       | 4                       | 4                       |
| 4                       | 2                       | 4                       | 5                       |
| 5                       | 1                       | 5                       | 5                       |
| 4                       | 5                       | 4                       | 5                       |
| 4                       | 3                       | 5                       | 5                       |
| 5                       | 3                       | 4                       | 5                       |
| 4                       | 4                       | 4                       | 4                       |
| 5                       | 3                       | 5                       | 4                       |
| 5                       | 4                       | 5                       | 5                       |
| 5                       | 3                       | 4                       | 4                       |
| 1                       | 1                       | 1                       | 1                       |
| 5                       | 4                       | 5                       | 5                       |
| 5                       | 4                       | 4                       | 4                       |
| 4                       | 4                       | 4                       | 4                       |
| 5                       | 3                       | 4                       | 4                       |
| 5                       | 5                       | 5                       | 5                       |
| 5                       | 4                       | 4                       | 4                       |
| 4                       | 2                       | 4                       | 4                       |
| 5                       | 3                       | 5                       | 4                       |
| 5                       | 4                       | 4                       | 3                       |
| 5                       | 5                       | 5                       | 5                       |

|   |   |   |   |
|---|---|---|---|
| 3 | 2 | 2 | 3 |
| 4 | 3 | 5 | 5 |
| 4 | 3 | 4 | 3 |
| 4 | 4 | 4 | 4 |
| 5 | 4 | 5 | 5 |
| 5 | 5 | 5 | 5 |
| 5 | 4 | 5 | 5 |
| 4 | 2 | 3 | 4 |
| 4 | 3 | 4 | 4 |
| 5 | 4 | 5 | 4 |
| 5 | 3 | 4 | 5 |
| 5 | 3 | 4 | 5 |
| 5 | 2 | 4 | 5 |
| 5 | 4 | 5 | 5 |
| 5 | 1 | 2 | 5 |
| 5 | 4 | 3 | 4 |
| 5 | 5 | 5 | 4 |
| 5 | 5 | 4 | 5 |
| 4 | 4 | 5 | 4 |
| 4 | 3 | 5 | 5 |
| 5 | 4 | 5 | 5 |
| 5 | 5 | 5 | 5 |
| 4 | 5 | 5 | 5 |
| 4 | 3 | 4 | 4 |
| 5 | 4 | 5 | 5 |
| 5 | 5 | 5 | 5 |
| 4 | 3 | 3 | 4 |
| 5 | 5 | 5 | 5 |
| 5 | 5 | 5 | 5 |
| 5 | 3 | 5 | 5 |
| 4 | 3 | 4 | 4 |
| 4 | 3 | 4 | 4 |
| 5 | 3 | 3 | 4 |
| 5 | 4 | 5 | 5 |
| 4 | 3 | 4 | 3 |
| 5 | 3 | 3 | 4 |
| 5 | 3 | 4 | 4 |
| 4 | 4 | 5 | 5 |
| 5 | 3 | 5 | 4 |
| 4 | 4 | 4 | 5 |
| 5 | 4 | 4 | 4 |
| 5 | 5 | 5 | 5 |
| 5 | 4 | 4 | 4 |
| 5 | 3 | 4 | 3 |
| 4 | 4 | 4 | 4 |
| 4 | 4 | 4 | 5 |
| 5 | 2 | 4 | 4 |

|   |   |   |   |
|---|---|---|---|
| 5 | 2 | 5 | 4 |
| 5 | 3 | 4 | 5 |
| 5 | 4 | 5 | 5 |
| 5 | 5 | 5 | 5 |
| 4 | 5 | 5 | 4 |
| 5 | 4 | 5 | 5 |
| 4 | 4 | 4 | 4 |
| 5 | 5 | 5 | 5 |
| 5 | 5 | 5 | 5 |
| 5 | 3 | 4 | 4 |
| 5 | 2 | 5 | 5 |
| 5 | 4 | 4 | 3 |
| 4 | 4 | 4 | 4 |
| 4 | 4 | 4 | 4 |
| 4 | 3 | 3 | 4 |
| 5 | 4 | 4 | 5 |
| 5 | 5 | 5 | 5 |
| 4 | 4 | 5 | 5 |
| 5 | 4 | 5 | 5 |
| 5 | 4 | 4 | 5 |
| 5 | 4 | 5 | 5 |
| 5 | 4 | 4 | 4 |
| 5 | 4 | 5 | 5 |
| 5 | 3 | 4 | 5 |
| 4 | 3 | 4 | 4 |
| 3 | 4 | 4 | 4 |
| 5 | 3 | 5 | 5 |
| 5 | 4 | 5 | 5 |
| 3 | 2 | 4 | 5 |
| 4 | 2 | 4 | 4 |
| 5 | 3 | 4 | 5 |
| 4 | 4 | 5 | 5 |
| 5 | 5 | 5 | 5 |
| 5 | 4 | 4 | 5 |
| 5 | 4 | 4 | 5 |
| 4 | 1 | 4 | 5 |
| 5 | 3 | 4 | 5 |
| 5 | 5 | 5 | 5 |
| 5 | 4 | 5 | 5 |
| 5 | 5 | 5 | 5 |
| 5 | 5 | 5 | 3 |
| 5 | 3 | 5 | 5 |
| 5 | 3 | 3 | 3 |
| 4 | 4 | 4 | 4 |
| 5 | 3 | 4 | 5 |
| 5 | 5 | 5 | 5 |
| 5 | 4 | 5 | 4 |
| 5 | 5 | 5 | 5 |

|   |   |   |   |
|---|---|---|---|
| 5 | 4 | 4 | 4 |
| 5 | 4 | 5 | 5 |
| 5 | 4 | 2 | 2 |
| 5 | 4 | 5 | 4 |
| 5 | 3 | 5 | 5 |
| 5 | 4 | 5 | 5 |
| 5 | 1 | 1 | 3 |
| 5 | 4 | 4 | 4 |
| 5 | 5 | 5 | 4 |
| 5 | 5 | 5 | 5 |
| 5 | 4 | 4 | 4 |
| 5 | 4 | 4 | 5 |
| 5 | 5 | 5 | 5 |
| 4 | 3 | 5 | 4 |
| 4 | 3 | 5 | 5 |
| 5 | 4 | 4 | 4 |
| 5 | 3 | 4 | 5 |
| 4 | 4 | 5 | 5 |
| 5 | 4 | 5 | 5 |
| 4 | 4 | 5 | 4 |
| 5 | 5 | 5 | 5 |
| 4 | 3 | 4 | 4 |
| 5 | 3 | 5 | 5 |
| 5 | 3 | 4 | 3 |
| 5 | 4 | 5 | 5 |
| 5 | 4 | 5 | 4 |
| 5 | 5 | 3 | 3 |
| 4 | 4 | 5 | 5 |
| 5 | 5 | 5 | 5 |
| 5 | 5 | 5 | 5 |
| 5 | 2 | 5 | 5 |
| 5 | 5 | 5 | 5 |
| 5 | 5 | 5 | 5 |
| 5 | 5 | 5 | 5 |
| 4 | 3 | 4 | 5 |
| 5 | 4 | 5 | 5 |
| 4 | 3 | 4 | 5 |
| 4 | 3 | 4 | 5 |
| 5 | 2 | 5 | 5 |
| 5 | 5 | 5 | 5 |
| 5 | 5 | 5 | 5 |
| 5 | 4 | 4 | 5 |
| 5 | 4 | 5 | 5 |
| 5 | 5 | 5 | 5 |
| 5 | 5 | 5 | 4 |
| 5 | 5 | 5 | 5 |
| 5 | 1 | 5 | 5 |
| 5 | 4 | 5 | 5 |

|     |    |     |     |
|-----|----|-----|-----|
| 4   | 5  | 5   | 4   |
| 5   | 4  | 5   | 5   |
| 5   | 3  | 5   | 5   |
| 4   | 4  | 4   | 4   |
| 5   | 4  | 4   | 5   |
| 5   | 4  | 4   | 5   |
| 4   | 3  | 5   | 5   |
| 5   | 5  | 5   | 3   |
| 5   | 3  | 5   | 3   |
| 5   | 5  | 5   | 4   |
| 5   | 1  | 5   | 5   |
| 5   | 4  | 5   | 5   |
| 2   | 7  | 3   | 2   |
| 0   | 15 | 3   | 1   |
| 4   | 51 | 10  | 15  |
| 53  | 76 | 75  | 61  |
| 144 | 54 | 112 | 124 |





| What instrument (or res | What instrument (or res | What instrument (or res | Other, please specify |
|-------------------------|-------------------------|-------------------------|-----------------------|
| 4                       | 5                       | 3                       |                       |
| 5                       | 3                       | 3                       |                       |
| 5                       | 5                       | 5                       |                       |
| 1                       | 1                       | 3                       |                       |
| 5                       | 5                       | 3                       |                       |
| 5                       | 5                       | 2                       |                       |
| 5                       | 5                       | 3                       |                       |
| 4                       | 5                       | 1                       |                       |
| 3                       | 5                       | 1                       |                       |
| 3                       | 3                       | 3                       |                       |
| 1                       | 1                       | 1                       |                       |
| 3                       | 4                       | 2                       |                       |
| 5                       | 5                       | 1                       |                       |
| 3                       | 4                       | 4                       |                       |
| 5                       | 5                       | 3                       |                       |
| 4                       | 4                       | 1                       |                       |
| 5                       | 5                       | 3                       |                       |
| 5                       | 3                       | 2                       |                       |
| 5                       | 3                       | 2                       |                       |
| 5                       | 4                       | 3                       |                       |
| 5                       | 5                       | 3                       |                       |
| 4                       | 5                       | 3                       |                       |
| 5                       | 5                       | 3                       |                       |
| 5                       | 5                       | 2                       |                       |
| 5                       | 5                       | 4                       |                       |
| 5                       | 5                       | 1                       |                       |
| 5                       | 5                       | 2                       |                       |
| 5                       | 3                       | 4                       |                       |
| 5                       | 3                       | 3                       |                       |
| 4                       | 5                       | 3                       |                       |
| 5                       | 5                       | 2                       |                       |
| 5                       | 5                       | 1                       |                       |
| 4                       | 4                       | 3                       |                       |
| 5                       | 5                       | 3                       |                       |
| 5                       | 5                       | 5                       |                       |
| 4                       | 4                       | 2                       |                       |
| 1                       | 1                       | 1                       |                       |
| 4                       | 3                       | 1                       |                       |
| 4                       | 5                       | 2                       |                       |
| 4                       | 4                       | 2                       |                       |
| 4                       | 4                       | 3                       |                       |
| 5                       | 5                       | 3                       |                       |
| 4                       | 5                       | 2                       |                       |
| 4                       | 2                       | 3                       |                       |
| 5                       | 5                       | 2                       |                       |
| 4                       | 4                       | 2                       |                       |
| 5                       | 5                       | 1                       |                       |



|   |   |   |                         |
|---|---|---|-------------------------|
| 3 | 2 | 1 |                         |
| 5 | 5 | 2 |                         |
| 4 | 4 | 4 |                         |
| 4 | 4 | 3 |                         |
| 5 | 5 | 1 |                         |
| 2 | 5 | 2 |                         |
| 4 | 4 | 4 |                         |
| 4 | 4 | 4 |                         |
| 4 | 3 | 2 |                         |
| 2 | 5 | 1 | The economic system i   |
| 5 | 4 | 4 |                         |
| 5 | 4 | 4 |                         |
| 4 | 5 | 3 |                         |
| 5 | 5 | 1 |                         |
| 5 | 5 | 1 |                         |
| 5 | 5 | 4 |                         |
| 4 | 4 | 1 | The current progress is |
| 5 | 5 | 2 |                         |
| 4 | 4 | 3 |                         |
| 2 | 3 | 3 | We have to use renova   |
| 5 | 4 | 2 |                         |
| 5 | 5 | 1 |                         |
| 5 | 5 | 2 |                         |
| 4 | 5 | 4 |                         |
| 5 | 5 | 2 |                         |
| 5 | 5 | 3 |                         |
| 3 | 4 | 4 |                         |
| 5 | 5 | 2 |                         |
| 5 | 5 | 3 |                         |
| 5 | 5 | 3 |                         |
| 5 | 5 | 2 |                         |
| 2 | 3 | 3 |                         |
| 4 | 4 | 4 |                         |
| 4 | 3 | 1 |                         |
| 5 | 4 | 2 | Solutions in everyday p |
| 5 | 5 | 2 |                         |
| 4 | 5 | 1 |                         |
| 3 | 5 | 1 |                         |
| 5 | 5 | 4 |                         |
| 4 | 4 | 2 |                         |
| 4 | 5 | 4 |                         |
| 4 | 4 | 2 |                         |
| 5 | 5 | 1 |                         |
| 3 | 4 | 5 |                         |
| 3 | 4 | 2 |                         |
| 4 | 4 | 4 |                         |
| 5 | 5 | 2 |                         |
| 3 | 4 | 3 | changes in energy sour  |

|   |   |   |
|---|---|---|
| 4 | 3 | 1 |
| 5 | 5 | 3 |
| 4 | 4 | 1 |
| 3 | 5 | 1 |
| 4 | 4 | 2 |
| 5 | 5 | 4 |
| 4 | 4 | 3 |
| 5 | 5 | 3 |
| 5 | 5 | 5 |
| 4 | 5 | 3 |
| 4 | 5 | 1 |
| 4 | 4 | 2 |
| 4 | 4 | 2 |
| 4 | 4 | 4 |
| 4 | 4 | 3 |
| 5 | 4 | 3 |
| 5 | 5 | 4 |
| 5 | 5 | 3 |
| 4 | 4 | 3 |
| 5 | 5 | 3 |
| 4 | 4 | 3 |
| 4 | 5 | 2 |
| 5 | 5 | 3 |
| 4 | 3 | 3 |
| 5 | 4 | 4 |
| 4 | 4 | 3 |
| 5 | 5 | 3 |
| 5 | 5 | 1 |
| 3 | 3 | 2 |
| 4 | 4 | 3 |
| 5 | 5 | 4 |
| 3 | 5 | 2 |
| 5 | 5 | 5 |
| 5 | 5 | 4 |
| 4 | 4 | 2 |
| 4 | 4 | 1 |
| 5 | 2 | 3 |
| 5 | 5 | 1 |
| 5 | 5 | 3 |
| 5 | 5 | 1 |
| 3 | 5 | 2 |
| 4 | 5 | 2 |
| 4 | 5 | 3 |
| 4 | 4 | 2 |
| 2 | 4 | 3 |
| 5 | 5 | 3 |
| 4 | 5 | 1 |
| 4 | 5 | 1 |

|   |   |   |
|---|---|---|
| 5 | 4 | 1 |
| 5 | 5 | 2 |
| 4 | 4 | 2 |
| 5 | 4 | 1 |
| 5 | 5 | 2 |
| 5 | 5 | 1 |
| 5 | 2 | 2 |
| 4 | 4 | 1 |
| 5 | 5 | 3 |
| 3 | 4 | 3 |
| 5 | 4 | 2 |
| 4 | 5 | 4 |
| 5 | 5 | 4 |
| 4 | 5 | 3 |
| 5 | 5 | 1 |
| 5 | 5 | 2 |
| 4 | 4 | 3 |
| 4 | 5 | 2 |
| 5 | 5 | 3 |
| 3 | 5 | 1 |
| 5 | 5 | 5 |
| 4 | 3 | 4 |
| 3 | 3 | 1 |
| 5 | 3 | 3 |
| 5 | 5 | 3 |
| 5 | 5 | 2 |
| 5 | 5 | 3 |
| 5 | 5 | 2 |
| 5 | 5 | 4 |
| 5 | 3 | 4 |
| 5 | 5 | 3 |
| 5 | 5 | 1 |
| 5 | 5 | 1 |
| 5 | 5 | 1 |
| 4 | 5 | 4 |
| 4 | 5 | 2 |
| 4 | 5 | 1 |
| 4 | 5 | 1 |
| 4 | 4 | 1 |
| 5 | 5 | 1 |
| 5 | 5 | 3 |
| 4 | 4 | 1 |
| 5 | 5 | 3 |
| 4 | 4 | 3 |
| 3 | 3 | 2 |
| 5 | 5 | 1 |
| 5 | 5 | 5 |
| 4 | 4 | 4 |

n/a

Reconnection is needed

Reconnection is needed

|     |     |      |
|-----|-----|------|
| 4   | 5   | 5    |
| 4   | 5   | 2    |
| 4   | 4   | 1    |
| 4   | 4   | 4 No |
| 5   | 5   | 4    |
| 4   | 4   | 3    |
| 5   | 5   | 2    |
| 5   | 5   | 3    |
| 4   | 5   | 1    |
| 5   | 5   | 1    |
| 5   | 5   | 1    |
| 5   | 5   | 5    |
| 3   | 3   | 51   |
| 5   | 4   | 51   |
| 18  | 19  | 62   |
| 74  | 58  | 30   |
| 103 | 119 | 9    |





| Rate your level of agree |
|--------------------------|--------------------------|--------------------------|--------------------------|
| 4                        | 5                        | 5                        | 3                        |
| 4                        | 3                        | 4                        | 5                        |
| 2                        | 3                        | 3                        | 5                        |
| 2                        | 2                        | 3                        | 3                        |
| 4                        | 4                        | 4                        | 3                        |
| 5                        | 5                        | 5                        | 4                        |
| 4                        | 4                        | 4                        | 3                        |
| 5                        | 5                        | 5                        | 1                        |
| 5                        | 5                        | 5                        | 1                        |
| 3                        | 3                        | 3                        | 2                        |
| 3                        | 2                        | 3                        | 1                        |
| 5                        | 5                        | 5                        | 1                        |
| 5                        | 5                        | 5                        | 3                        |
| 5                        | 4                        | 5                        | 1                        |
| 5                        | 5                        | 5                        | 3                        |
| 4                        | 5                        | 5                        | 3                        |
| 5                        | 5                        | 5                        | 1                        |
| 5                        | 5                        | 5                        | 2                        |
| 5                        | 5                        | 5                        | 2                        |
| 5                        | 5                        | 5                        | 2                        |
| 5                        | 4                        | 5                        | 1                        |
| 5                        | 4                        | 5                        | 2                        |
| 5                        | 5                        | 5                        | 3                        |
| 5                        | 3                        | 3                        | 2                        |
| 5                        | 5                        | 5                        | 1                        |
| 5                        | 4                        | 5                        | 2                        |
| 4                        | 4                        | 4                        | 3                        |
| 5                        | 4                        | 3                        | 3                        |
| 4                        | 3                        | 3                        | 4                        |
| 5                        | 5                        | 5                        | 3                        |
| 5                        | 5                        | 5                        | 2                        |
| 5                        | 5                        | 5                        | 1                        |
| 4                        | 4                        | 4                        | 4                        |
| 5                        | 5                        | 5                        | 1                        |
| 5                        | 5                        | 4                        | 2                        |
| 4                        | 3                        | 5                        | 3                        |
| 1                        | 1                        | 1                        | 1                        |
| 5                        | 5                        | 5                        | 2                        |
| 4                        | 2                        | 4                        | 4                        |
| 3                        | 4                        | 5                        | 3                        |
| 5                        | 4                        | 4                        | 1                        |
| 5                        | 5                        | 5                        | 2                        |
| 5                        | 5                        | 5                        | 2                        |
| 4                        | 4                        | 4                        | 3                        |
| 4                        | 5                        | 5                        | 3                        |
| 4                        | 3                        | 3                        | 2                        |
| 5                        | 5                        | 3                        | 2                        |

|   |   |   |   |
|---|---|---|---|
| 5 | 5 | 3 | 3 |
| 2 | 3 | 5 | 3 |
| 4 | 4 | 4 | 4 |
| 4 | 3 | 4 | 3 |
| 5 | 5 | 5 | 3 |
| 5 | 5 | 5 | 1 |
| 4 | 5 | 5 | 3 |
| 4 | 4 | 4 | 1 |
| 4 | 4 | 4 | 3 |
| 5 | 5 | 5 | 1 |
| 4 | 4 | 4 | 3 |
| 4 | 4 | 4 | 3 |
| 5 | 5 | 5 | 1 |
| 5 | 4 | 5 | 1 |
| 5 | 5 | 5 | 2 |
| 4 | 4 | 3 | 3 |
| 5 | 5 | 5 | 1 |
| 4 | 5 | 5 | 2 |
| 5 | 4 | 5 | 3 |
| 3 | 4 | 3 | 1 |
| 4 | 5 | 5 | 4 |
| 5 | 5 | 5 | 1 |
| 2 | 5 | 5 | 2 |
| 4 | 4 | 4 | 2 |
| 5 | 4 | 4 | 1 |
| 4 | 4 | 4 | 2 |
| 3 | 2 | 2 | 3 |
| 5 | 5 | 5 | 1 |
| 5 | 5 | 4 | 3 |
| 5 | 5 | 4 | 3 |
| 5 | 5 | 4 | 1 |
| 4 | 4 | 4 | 2 |
| 4 | 2 | 2 | 1 |
| 5 | 5 | 5 | 1 |
| 4 | 3 | 4 | 3 |
| 4 | 4 | 4 | 3 |
| 5 | 3 | 4 | 3 |
| 5 | 4 | 5 | 2 |
| 4 | 4 | 4 | 3 |
| 5 | 4 | 5 | 2 |
| 4 | 4 | 2 | 2 |
| 4 | 5 | 5 | 1 |
| 5 | 4 | 4 | 2 |
| 5 | 5 | 5 | 3 |
| 4 | 4 | 3 | 3 |
| 4 | 3 | 3 | 2 |
| 4 | 4 | 4 | 2 |
| 5 | 5 | 4 | 2 |



|   |   |   |   |
|---|---|---|---|
| 2 | 5 | 5 | 1 |
| 5 | 4 | 4 | 1 |
| 4 | 5 | 5 | 1 |
| 5 | 5 | 5 | 2 |
| 4 | 4 | 5 | 3 |
| 4 | 4 | 4 | 2 |
| 5 | 4 | 4 | 2 |
| 5 | 5 | 5 | 4 |
| 5 | 3 | 4 | 2 |
| 5 | 4 | 4 | 3 |
| 5 | 5 | 5 | 2 |
| 5 | 5 | 5 | 5 |
| 4 | 4 | 4 | 2 |
| 3 | 3 | 3 | 3 |
| 4 | 5 | 5 | 3 |
| 5 | 5 | 5 | 2 |
| 5 | 5 | 1 | 1 |
| 4 | 5 | 5 | 1 |
| 4 | 5 | 5 | 5 |
| 4 | 4 | 5 | 3 |
| 4 | 4 | 4 | 4 |
| 5 | 4 | 5 | 1 |
| 5 | 5 | 5 | 2 |
| 5 | 4 | 3 | 1 |
| 5 | 5 | 5 | 5 |
| 4 | 4 | 4 | 3 |
| 5 | 5 | 4 | 1 |
| 5 | 5 | 5 | 2 |
| 3 | 3 | 3 | 2 |
| 5 | 3 | 4 | 2 |
| 5 | 5 | 5 | 4 |
| 5 | 4 | 5 | 2 |
| 5 | 3 | 3 | 1 |
| 4 | 5 | 5 | 3 |
| 4 | 5 | 5 | 3 |
| 5 | 5 | 5 | 1 |
| 5 | 5 | 5 | 2 |
| 5 | 2 | 5 | 1 |
| 5 | 4 | 2 | 3 |
| 5 | 5 | 5 | 3 |
| 3 | 2 | 4 | 1 |
| 5 | 1 | 4 | 1 |
| 5 | 4 | 4 | 2 |
| 4 | 3 | 3 | 2 |
| 4 | 5 | 5 | 1 |
| 5 | 4 | 5 | 2 |
| 5 | 3 | 4 | 2 |
| 5 | 5 | 4 | 1 |

|   |   |   |   |
|---|---|---|---|
| 5 | 5 | 5 | 1 |
| 5 | 5 | 5 | 1 |
| 5 | 5 | 5 | 1 |
| 5 | 5 | 5 | 1 |
| 5 | 5 | 5 | 1 |
| 5 | 5 | 5 | 3 |
| 5 | 1 | 1 | 4 |
| 5 | 3 | 4 | 2 |
| 5 | 5 | 5 | 1 |
| 5 | 5 | 5 | 1 |
| 4 | 5 | 5 | 4 |
| 5 | 4 | 5 | 1 |
| 5 | 5 | 3 | 3 |
| 5 | 5 | 5 | 2 |
| 5 | 4 | 5 | 1 |
| 5 | 5 | 5 | 1 |
| 3 | 4 | 4 | 2 |
| 4 | 3 | 4 | 2 |
| 5 | 4 | 5 | 1 |
| 5 | 3 | 4 | 3 |
| 5 | 4 | 5 | 3 |
| 5 | 3 | 3 | 1 |
| 5 | 5 | 5 | 3 |
| 5 | 5 | 5 | 1 |
| 5 | 5 | 5 | 3 |
| 5 | 5 | 5 | 3 |
| 5 | 3 | 5 | 1 |
| 5 | 4 | 5 | 2 |
| 4 | 4 | 4 | 1 |
| 4 | 4 | 4 | 2 |
| 5 | 5 | 5 | 2 |
| 5 | 5 | 5 | 1 |
| 5 | 4 | 1 | 1 |
| 5 | 5 | 4 | 2 |
| 4 | 3 | 3 | 1 |
| 5 | 5 | 5 | 2 |
| 5 | 4 | 4 | 1 |
| 5 | 4 | 4 | 1 |
| 5 | 5 | 5 | 2 |
| 5 | 3 | 4 | 2 |
| 5 | 5 | 4 | 3 |
| 5 | 4 | 5 | 3 |
| 5 | 5 | 5 | 2 |
| 5 | 5 | 5 | 4 |
| 4 | 4 | 3 | 5 |
| 4 | 4 | 5 | 1 |
| 5 | 5 | 5 | 1 |
| 5 | 5 | 5 | 4 |

|     |     |     |    |
|-----|-----|-----|----|
| 5   | 5   | 5   | 5  |
| 5   | 4   | 4   | 1  |
| 5   | 5   | 5   | 1  |
| 5   | 5   | 3   | 3  |
| 5   | 4   | 5   | 4  |
| 5   | 5   | 5   | 2  |
| 3   | 5   | 5   | 2  |
| 5   | 5   | 5   | 3  |
| 5   | 5   | 5   | 5  |
| 5   | 5   | 5   | 3  |
| 5   | 5   | 5   | 1  |
| 5   | 5   | 5   | 3  |
| 1   | 3   | 4   | 66 |
| 5   | 7   | 4   | 58 |
| 10  | 26  | 24  | 57 |
| 56  | 64  | 56  | 14 |
| 131 | 103 | 115 | 8  |





| In your country, with res | In your country, the diff | In your country, the diff | In your country, the diff |
|---------------------------|---------------------------|---------------------------|---------------------------|
| same                      | 1                         | 1                         | 1                         |
| same                      | 5                         | 5                         | 5                         |
| same                      | 5                         | 4                         | 5                         |
| same                      | 3                         | 3                         | 2                         |
| same                      | 3                         | 3                         | 3                         |
| same                      | 4                         | 4                         | 4                         |
| Is higher                 | 4                         | 4                         | 4                         |
| Is higher                 | 1                         | 1                         | 2                         |
| same                      | 4                         | 3                         | 4                         |
| same                      | 3                         | 3                         | 3                         |
| same                      | 1                         | 1                         | 2                         |
| same                      | 4                         | 4                         | 4                         |
| Is lower                  | 3                         | 4                         | 4                         |
| same                      | 3                         | 2                         | 3                         |
| same                      | 3                         | 3                         | 3                         |
| Is lower                  | 3                         | 3                         | 2                         |
| Is higher                 | 4                         | 3                         | 5                         |
| same                      | 2                         | 2                         | 3                         |
| same                      | 2                         | 2                         | 3                         |
| same                      | 3                         | 3                         | 3                         |
| same                      | 4                         | 4                         | 4                         |
| Is lower                  | 2                         | 2                         | 3                         |
| Is lower                  | 1                         | 1                         | 5                         |
| same                      | 3                         | 1                         | 3                         |
| Is lower                  | 3                         | 2                         | 3                         |
| Is lower                  | 1                         | 2                         | 2                         |
| Is higher                 | 3                         | 2                         | 3                         |
| Is higher                 | 2                         | 2                         | 4                         |
| Is lower                  | 1                         | 1                         | 1                         |
| same                      | 3                         | 3                         | 3                         |
| Is higher                 | 3                         | 2                         | 3                         |
| Is lower                  | 5                         | 5                         | 5                         |
| Is higher                 | 4                         | 4                         | 4                         |
| Is lower                  | 1                         | 1                         | 4                         |
| same                      | 3                         | 3                         | 3                         |
| Is higher                 | 3                         | 3                         | 4                         |
| Is higher                 | 1                         | 1                         | 1                         |
| same                      | 3                         | 3                         | 3                         |
| Is lower                  | 4                         | 4                         | 5                         |
| Is lower                  | 3                         | 3                         | 3                         |
| Is lower                  | 3                         | 2                         | 2                         |
| Is higher                 | 2                         | 2                         | 3                         |
| Is higher                 | 4                         | 3                         | 3                         |
| same                      | 2                         | 2                         | 3                         |
| Is higher                 | 2                         | 2                         | 3                         |
| Is lower                  | 3                         | 2                         | 4                         |
| Is higher                 | 3                         | 3                         | 3                         |

|                          |   |   |   |
|--------------------------|---|---|---|
| same                     | 3 | 3 | 4 |
| Is higher                | 4 | 4 | 3 |
| Is lower                 | 3 | 3 | 3 |
| same                     | 3 | 3 | 3 |
| same                     | 2 | 2 | 2 |
| Is lower                 | 1 | 1 | 3 |
| Is higher                | 4 | 3 | 4 |
| same                     | 2 | 2 | 3 |
| same                     | 3 | 3 | 3 |
| Is lower                 | 1 | 3 | 2 |
| Is higher                | 3 | 3 | 4 |
| Is higher                | 3 | 3 | 4 |
| same                     | 2 | 2 | 3 |
| Is lower                 | 2 | 1 | 3 |
| Is lower                 | 2 | 2 | 3 |
| same                     | 2 | 2 | 2 |
| Is higher                | 4 | 2 | 4 |
| We don't need to fight : | 3 | 2 | 4 |
| Is higher                | 4 | 3 | 4 |
| same                     | 3 | 2 | 2 |
| Is higher                | 2 | 2 | 2 |
| same                     | 4 | 4 | 5 |
| same                     | 4 | 3 | 3 |
| Is higher                | 3 | 3 | 4 |
| same                     | 3 | 3 | 3 |
| Is higher                | 5 | 5 | 5 |
| same                     | 3 | 3 | 3 |
| same                     | 5 | 3 | 3 |
| Is higher                | 4 | 5 | 5 |
| Is higher                | 4 | 5 | 5 |
| Is higher                | 3 | 2 | 4 |
| Is higher                | 1 | 1 | 2 |
| Is higher                | 4 | 3 | 3 |
| Is higher                | 3 | 3 | 4 |
| Is lower                 | 3 | 3 | 3 |
| same                     | 3 | 3 | 4 |
| same                     | 3 | 3 | 2 |
| same                     | 3 | 2 | 2 |
| same                     | 4 | 4 | 4 |
| Is lower                 | 4 | 4 | 4 |
| Is higher                | 4 | 2 | 2 |
| Is higher                | 4 | 4 | 4 |
| Is lower                 | 1 | 1 | 1 |
| Is higher                | 3 | 3 | 2 |
| Is higher                | 2 | 2 | 4 |
| same                     | 3 | 3 | 4 |
| Is higher                | 3 | 3 | 4 |
| same                     | 3 | 2 | 2 |

|                          |   |   |   |
|--------------------------|---|---|---|
| Is higher                | 5 | 2 | 5 |
| same                     | 4 | 3 | 4 |
| same                     | 2 | 2 | 2 |
| Is lower                 | 3 | 3 | 3 |
| Is higher                | 2 | 3 | 2 |
| same                     | 2 | 2 | 2 |
| same                     | 2 | 2 | 3 |
| Is lower                 | 3 | 4 | 4 |
| Is higher                | 5 | 2 | 4 |
| Is higher                | 3 | 3 | 3 |
| Is higher                | 4 | 3 | 4 |
| same                     | 3 | 4 | 4 |
| Is higher                | 4 | 4 | 4 |
| Is higher                | 4 | 4 | 4 |
| Is lower                 | 2 | 3 | 2 |
| same                     | 4 | 4 | 4 |
| Is higher                | 2 | 2 | 2 |
| Is higher                | 4 | 4 | 5 |
| Is lower                 | 2 | 3 | 3 |
| Is lower                 | 2 | 2 | 3 |
| Is lower                 | 2 | 2 | 4 |
| same                     | 1 | 1 | 2 |
| Is higher                | 2 | 2 | 5 |
| We don't need to fight : | 3 | 4 | 4 |
| same                     | 3 | 2 | 3 |
| Is higher                | 3 | 3 | 3 |
| Is lower                 | 5 | 4 | 4 |
| same                     | 3 | 3 | 4 |
| same                     | 2 | 2 | 3 |
| Is higher                | 2 | 2 | 2 |
| Is lower                 | 3 | 3 | 2 |
| same                     | 4 | 4 | 4 |
| Is higher                | 2 | 1 | 5 |
| Is higher                | 4 | 4 | 4 |
| same                     | 3 | 2 | 3 |
| Is higher                | 4 | 3 | 4 |
| Is lower                 | 2 | 2 | 4 |
| same                     | 1 | 1 | 1 |
| Is higher                | 3 | 2 | 4 |
| Is lower                 | 2 | 2 | 1 |
| same                     | 2 | 2 | 4 |
| same                     | 3 | 4 | 5 |
| Is lower                 | 3 | 3 | 5 |
| Is higher                | 3 | 3 | 3 |
| same                     | 2 | 2 | 3 |
| Is lower                 | 4 | 4 | 3 |
| Is lower                 | 2 | 1 | 2 |
| Is higher                | 1 | 1 | 2 |



|           |   |   |   |
|-----------|---|---|---|
| Is lower  | 2 | 2 | 5 |
| Is lower  | 3 | 3 | 4 |
| Is lower  | 2 | 2 | 2 |
| Is lower  | 2 | 2 | 2 |
| Is lower  | 3 | 3 | 3 |
| same      | 3 | 3 | 3 |
| Is higher | 4 | 2 | 4 |
| Is higher | 2 | 2 | 4 |
| Is higher | 4 | 4 | 5 |
| Is higher | 3 | 3 | 4 |
| Is lower  | 2 | 2 | 1 |
| Is higher | 3 | 4 | 5 |
| Is higher | 4 | 4 | 4 |
| same      | 3 | 3 | 3 |
| Is lower  | 3 | 3 | 3 |
| Is lower  | 1 | 1 | 1 |
| same      | 3 | 3 | 3 |
| same      | 4 | 4 | 3 |
| Is higher | 4 | 2 | 5 |
| same      | 1 | 1 | 2 |
| Is lower  | 3 | 3 | 1 |
| Is lower  | 2 | 2 | 2 |
| Is higher | 1 | 1 | 3 |
| Is higher | 4 | 4 | 4 |
| same      | 3 | 3 | 3 |
| Is higher | 4 | 3 | 3 |
| Is lower  | 1 | 1 | 1 |
| same      | 3 | 3 | 4 |
| Is higher | 4 | 3 | 4 |
| Is higher | 4 | 4 | 4 |
| same      | 3 | 3 | 3 |
| same      | 1 | 1 | 1 |
| Is lower  | 3 | 2 | 3 |
| Is lower  | 2 | 2 | 3 |
| same      | 3 | 3 | 3 |
| Is higher | 5 | 3 | 4 |
| Is higher | 3 | 3 | 3 |
| Is higher | 3 | 3 | 3 |
| same      | 3 | 3 | 3 |
| same      | 3 | 3 | 2 |
| Is lower  | 2 | 2 | 1 |
| Is lower  | 2 | 1 | 4 |
| Is lower  | 2 | 2 | 2 |
| Is higher | 3 | 3 | 4 |
| same      | 2 | 4 | 3 |
| Is lower  | 1 | 1 | 1 |
| Is higher | 5 | 5 | 5 |
| Is higher | 4 | 3 | 4 |

|           |    |    |    |
|-----------|----|----|----|
| Is higher | 4  | 4  | 4  |
| same      | 2  | 2  | 2  |
| Is lower  | 3  | 3  | 1  |
| same      | 3  | 3  | 3  |
| same      | 3  | 3  | 3  |
| same      | 3  | 3  | 3  |
| Is lower  | 4  | 4  | 5  |
| same      | 4  | 4  | 4  |
| Is lower  | 2  | 2  | 2  |
| Is lower  | 1  | 1  | 1  |
| Is lower  | 4  | 2  | 4  |
| Is lower  | 2  | 2  | 2  |
|           |    |    |    |
| 70        | 22 | 25 | 15 |
| 74        | 47 | 62 | 36 |
| 57        | 78 | 75 | 68 |
| 2         | 46 | 35 | 62 |
|           | 10 | 6  | 22 |





| In your country, the diff | In your country, the diff | In your country, the diff | In your opinion, if not ei |
|---------------------------|---------------------------|---------------------------|----------------------------|
| 1                         | 1                         | 3                         | 4                          |
| 5                         | 5                         | 3                         | 3                          |
| 1                         | 5                         | 1                         | 2                          |
| 2                         | 5                         | 4                         | 3                          |
| 4                         | 4                         | 5                         | 3                          |
| 4                         | 2                         | 2                         | 2                          |
| 4                         | 2                         | 2                         | 5                          |
| 5                         | 2                         | 5                         | 2                          |
| 4                         | 3                         | 2                         | 1                          |
| 3                         | 3                         | 3                         | 2                          |
| 1                         | 2                         | 1                         | 2                          |
| 2                         | 1                         | 1                         | 4                          |
| 2                         | 2                         | 2                         | 3                          |
| 4                         | 3                         | 4                         | 4                          |
| 1                         | 1                         | 1                         | 2                          |
| 4                         | 2                         | 2                         | 4                          |
| 4                         | 1                         | 1                         | 4                          |
| 3                         | 1                         | 3                         | 5                          |
| 3                         | 1                         | 3                         | 5                          |
| 3                         | 2                         | 2                         | 3                          |
| 2                         | 1                         | 1                         | 3                          |
| 3                         | 2                         | 4                         | 2                          |
| 5                         | 5                         | 5                         | 1                          |
| 2                         | 1                         | 1                         | 2                          |
| 5                         | 4                         | 2                         | 4                          |
| 2                         | 2                         | 3                         | 2                          |
| 3                         | 2                         | 2                         | 3                          |
| 4                         | 1                         | 1                         | 4                          |
| 5                         | 1                         | 1                         | 4                          |
| 3                         | 1                         | 1                         | 4                          |
| 2                         | 1                         | 4                         | 5                          |
| 5                         | 3                         | 5                         | 2                          |
| 4                         | 4                         | 4                         | 3                          |
| 2                         | 1                         | 5                         | 3                          |
| 3                         | 3                         | 3                         | 2                          |
| 4                         | 1                         | 1                         | 3                          |
| 1                         | 1                         | 1                         | 1                          |
| 4                         | 1                         | 1                         | 4                          |
| 5                         | 2                         | 4                         | 3                          |
| 4                         | 3                         | 4                         | 3                          |
| 2                         | 2                         | 3                         | 4                          |
| 5                         | 2                         | 5                         | 2                          |
| 2                         | 2                         | 4                         | 3                          |
| 4                         | 1                         | 1                         | 3                          |
| 2                         | 1                         | 1                         | 1                          |
| 3                         | 1                         | 2                         | 3                          |
| 5                         | 3                         | 5                         | 3                          |

|   |   |   |   |
|---|---|---|---|
| 3 | 4 | 4 | 3 |
| 4 | 1 | 1 | 3 |
| 3 | 3 | 3 | 4 |
| 3 | 3 | 2 | 3 |
| 4 | 2 | 4 | 2 |
| 4 | 1 | 1 | 5 |
| 4 | 3 | 2 | 4 |
| 2 | 2 | 2 | 4 |
| 4 | 4 | 4 | 1 |
| 3 | 1 | 1 | 4 |
| 3 | 3 | 3 | 4 |
| 3 | 3 | 3 | 4 |
| 2 | 2 | 4 | 3 |
| 2 | 1 | 3 | 4 |
| 4 | 1 | 1 | 5 |
| 1 | 2 | 1 | 2 |
| 1 | 1 | 1 | 1 |
| 3 | 2 | 4 | 4 |
| 4 | 1 | 1 | 3 |
| 3 | 2 | 2 | 3 |
| 4 | 2 | 4 | 5 |
| 5 | 1 | 4 | 2 |
| 3 | 2 | 2 | 2 |
| 3 | 3 | 2 | 4 |
| 4 | 2 | 2 | 4 |
| 5 | 2 | 3 | 3 |
| 3 | 2 | 1 | 3 |
| 3 | 1 | 1 | 2 |
| 4 | 4 | 3 | 5 |
| 4 | 4 | 3 | 5 |
| 2 | 2 | 1 | 3 |
| 4 | 1 | 2 | 4 |
| 3 | 3 | 4 | 4 |
| 1 | 1 | 3 | 3 |
| 3 | 3 | 3 | 4 |
| 4 | 3 | 1 | 3 |
| 3 | 1 | 2 | 3 |
| 3 | 2 | 2 | 5 |
| 4 | 3 | 2 | 4 |
| 4 | 3 | 4 | 4 |
| 1 | 1 | 4 | 4 |
| 4 | 2 | 1 | 2 |
| 4 | 4 | 4 | 4 |
| 3 | 2 | 1 | 4 |
| 3 | 3 | 4 | 4 |
| 2 | 1 | 2 | 3 |
| 3 | 3 | 1 | 4 |
| 3 | 3 | 2 | 2 |

|   |   |   |   |
|---|---|---|---|
| 5 | 3 | 2 | 3 |
| 4 | 2 | 2 | 4 |
| 2 | 2 | 2 | 4 |
| 4 | 3 | 5 | 5 |
| 5 | 1 | 4 | 2 |
| 4 | 3 | 3 | 3 |
| 2 | 1 | 2 | 3 |
| 4 | 3 | 4 | 5 |
| 5 | 3 | 3 | 5 |
| 4 | 3 | 5 | 3 |
| 2 | 1 | 1 | 1 |
| 4 | 3 | 3 | 4 |
| 4 | 2 | 3 | 2 |
| 4 | 4 | 4 | 4 |
| 2 | 2 | 3 | 4 |
| 3 | 3 | 1 | 4 |
| 3 | 2 | 2 | 2 |
| 5 | 1 | 1 | 4 |
| 3 | 3 | 3 | 4 |
| 5 | 2 | 3 | 4 |
| 2 | 2 | 2 | 5 |
| 2 | 2 | 2 | 5 |
| 5 | 3 | 5 | 5 |
| 4 | 4 | 3 | 3 |
| 3 | 3 | 3 | 4 |
| 3 | 3 | 2 | 2 |
| 4 | 3 | 5 | 1 |
| 3 | 1 | 1 | 1 |
| 2 | 3 | 1 | 3 |
| 4 | 1 | 2 | 2 |
| 3 | 1 | 1 | 3 |
| 3 | 2 | 2 | 2 |
| 5 | 1 | 1 | 1 |
| 4 | 3 | 1 | 5 |
| 4 | 2 | 3 | 3 |
| 3 | 2 | 1 | 5 |
| 5 | 2 | 3 | 4 |
| 4 | 4 | 5 | 3 |
| 4 | 2 | 3 | 2 |
| 5 | 4 | 4 | 2 |
| 3 | 1 | 1 | 4 |
| 5 | 1 | 2 | 1 |
| 5 | 2 | 3 | 2 |
| 3 | 2 | 1 | 4 |
| 2 | 1 | 1 | 2 |
| 5 | 3 | 3 | 2 |
| 5 | 1 | 3 | 4 |
| 2 | 1 | 4 | 3 |

|   |   |   |   |
|---|---|---|---|
| 5 | 3 | 4 | 2 |
| 5 | 5 | 5 | 4 |
| 4 | 1 | 1 | 1 |
| 2 | 1 | 1 | 1 |
| 3 | 3 | 3 | 1 |
| 3 | 3 | 2 | 2 |
| 3 | 3 | 1 | 2 |
| 3 | 1 | 1 | 5 |
| 5 | 2 | 3 | 5 |
| 4 | 1 | 4 | 4 |
| 2 | 1 | 3 | 2 |
| 2 | 1 | 2 | 4 |
| 4 | 4 | 4 | 5 |
| 3 | 3 | 2 | 1 |
| 3 | 1 | 1 | 2 |
| 2 | 2 | 2 | 2 |
| 1 | 1 | 1 | 3 |
| 3 | 2 | 1 | 2 |
| 4 | 2 | 1 | 2 |
| 4 | 1 | 1 | 1 |
| 4 | 2 | 4 | 5 |
| 4 | 1 | 3 | 4 |
| 3 | 1 | 4 | 5 |
| 4 | 1 | 1 | 3 |
| 3 | 3 | 3 | 2 |
| 3 | 3 | 3 | 4 |
| 1 | 3 | 3 | 3 |
| 4 | 1 | 4 | 2 |
| 4 | 4 | 4 | 4 |
| 4 | 4 | 2 | 5 |
| 3 | 3 | 3 | 3 |
| 2 | 1 | 1 | 2 |
| 3 | 1 | 3 | 5 |
| 2 | 2 | 2 | 3 |
| 3 | 3 | 1 | 2 |
| 4 | 3 | 1 | 4 |
| 3 | 3 | 3 | 2 |
| 3 | 3 | 3 | 2 |
| 3 | 3 | 1 | 2 |
| 2 | 2 | 2 | 4 |
| 1 | 1 | 2 | 4 |
| 3 | 2 | 2 | 4 |
| 2 | 2 | 2 | 2 |
| 3 | 3 | 3 | 5 |
| 4 | 2 | 4 | 5 |
| 1 | 1 | 1 | 1 |
| 5 | 5 | 1 | 5 |
| 3 | 3 | 3 | 4 |



|    |    |    |    |
|----|----|----|----|
| 3  | 3  | 3  | 5  |
| 2  | 2  | 2  | 2  |
| 5  | 4  | 3  | 1  |
| 5  | 2  | 5  | 3  |
| 2  | 2  | 1  | 4  |
| 4  | 4  | 2  | 4  |
| 5  | 4  | 3  | 4  |
| 4  | 2  | 3  | 5  |
| 4  | 1  | 4  | 2  |
| 4  | 1  | 4  | 5  |
| 1  | 1  | 1  | 5  |
| 4  | 4  | 4  | 4  |
| 14 | 66 | 59 | 18 |
| 35 | 58 | 45 | 48 |
| 60 | 54 | 49 | 45 |
| 63 | 19 | 36 | 60 |
| 31 | 6  | 14 | 32 |





| In your opinion, if not en |
|----------------------------|----------------------------|----------------------------|----------------------------|
| 5                          | 5                          | 4                          | 4                          |
| 3                          | 3                          | 3                          | 3                          |
| 3                          | 2                          | 4                          | 2                          |
| 2                          | 1                          | 1                          | 4                          |
| 3                          | 4                          | 4                          | 3                          |
| 3                          | 2                          | 3                          | 5                          |
| 5                          | 5                          | 5                          | 4                          |
| 5                          | 5                          | 3                          | 3                          |
| 4                          | 3                          | 3                          | 5                          |
| 3                          | 3                          | 3                          | 2                          |
| 2                          | 3                          | 2                          | 1                          |
| 4                          | 4                          | 3                          | 4                          |
| 4                          | 4                          | 3                          | 4                          |
| 4                          | 3                          | 2                          | 2                          |
| 5                          | 4                          | 4                          | 3                          |
| 4                          | 4                          | 4                          | 4                          |
| 4                          | 5                          | 2                          | 5                          |
| 4                          | 4                          | 3                          | 3                          |
| 4                          | 4                          | 3                          | 3                          |
| 4                          | 3                          | 3                          | 3                          |
| 3                          | 5                          | 3                          | 5                          |
| 4                          | 5                          | 4                          | 5                          |
| 5                          | 5                          | 3                          | 3                          |
| 3                          | 4                          | 4                          | 4                          |
| 3                          | 4                          | 5                          | 5                          |
| 5                          | 5                          | 4                          | 5                          |
| 4                          | 5                          | 4                          | 4                          |
| 4                          | 4                          | 2                          | 2                          |
| 4                          | 4                          | 4                          | 4                          |
| 4                          | 4                          | 4                          | 3                          |
| 4                          | 4                          | 3                          | 2                          |
| 4                          | 4                          | 3                          | 5                          |
| 3                          | 3                          | 3                          | 3                          |
| 4                          | 3                          | 3                          | 5                          |
| 5                          | 5                          | 4                          | 4                          |
| 2                          | 3                          | 3                          | 4                          |
| 1                          | 1                          | 1                          | 1                          |
| 5                          | 5                          | 5                          | 5                          |
| 4                          | 4                          | 5                          | 5                          |
| 3                          | 4                          | 4                          | 4                          |
| 5                          | 5                          | 3                          | 3                          |
| 4                          | 5                          | 4                          | 3                          |
| 4                          | 5                          | 4                          | 4                          |
| 4                          | 4                          | 2                          | 4                          |
| 3                          | 2                          | 1                          | 5                          |
| 4                          | 4                          | 5                          | 3                          |
| 4                          | 4                          | 3                          | 4                          |

|   |   |   |   |
|---|---|---|---|
| 4 | 3 | 3 | 3 |
| 5 | 5 | 4 | 5 |
| 4 | 4 | 4 | 4 |
| 3 | 4 | 3 | 3 |
| 4 | 4 | 3 | 4 |
| 5 | 5 | 5 | 5 |
| 4 | 4 | 3 | 4 |
| 4 | 4 | 4 | 3 |
| 4 | 4 | 4 | 5 |
| 4 | 2 | 4 | 2 |
| 4 | 4 | 4 | 3 |
| 4 | 4 | 4 | 3 |
| 4 | 2 | 3 | 5 |
| 5 | 5 | 3 | 1 |
| 3 | 5 | 5 | 2 |
| 5 | 5 | 4 | 1 |
| 3 | 5 | 2 | 5 |
| 4 | 5 | 4 | 4 |
| 4 | 5 | 3 | 4 |
| 4 | 4 | 2 | 4 |
| 5 | 5 | 5 | 4 |
| 4 | 4 | 4 | 4 |
| 3 | 5 | 2 | 3 |
| 5 | 4 | 4 | 4 |
| 4 | 4 | 4 | 5 |
| 4 | 4 | 4 | 4 |
| 3 | 3 | 3 | 3 |
| 2 | 5 | 3 | 4 |
| 5 | 5 | 5 | 3 |
| 5 | 5 | 5 | 3 |
| 4 | 4 | 3 | 5 |
| 3 | 2 | 2 | 4 |
| 4 | 4 | 3 | 3 |
| 5 | 5 | 5 | 5 |
| 4 | 4 | 4 | 4 |
| 3 | 2 | 3 | 3 |
| 4 | 3 | 4 | 3 |
| 4 | 4 | 3 | 2 |
| 4 | 4 | 5 | 5 |
| 4 | 4 | 5 | 3 |
| 4 | 3 | 4 | 4 |
| 4 | 2 | 2 | 4 |
| 4 | 5 | 4 | 1 |
| 4 | 4 | 4 | 4 |
| 4 | 3 | 3 | 3 |
| 3 | 4 | 4 | 4 |
| 4 | 5 | 4 | 4 |
| 4 | 4 | 3 | 4 |

|   |   |   |   |
|---|---|---|---|
| 2 | 1 | 5 | 5 |
| 4 | 5 | 4 | 3 |
| 4 | 4 | 4 | 4 |
| 5 | 5 | 5 | 5 |
| 4 | 5 | 2 | 5 |
| 4 | 4 | 4 | 5 |
| 4 | 4 | 4 | 3 |
| 5 | 5 | 5 | 5 |
| 3 | 5 | 1 | 5 |
| 3 | 3 | 3 | 3 |
| 5 | 4 | 5 | 5 |
| 4 | 4 | 4 | 4 |
| 2 | 3 | 2 | 4 |
| 3 | 3 | 4 | 2 |
| 4 | 5 | 4 | 3 |
| 4 | 3 | 4 | 2 |
| 4 | 4 | 4 | 4 |
| 4 | 5 | 5 | 3 |
| 5 | 5 | 5 | 4 |
| 5 | 4 | 4 | 5 |
| 5 | 5 | 4 | 4 |
| 5 | 5 | 5 | 2 |
| 5 | 5 | 4 | 5 |
| 4 | 1 | 1 | 3 |
| 5 | 4 | 4 | 3 |
| 2 | 4 | 2 | 3 |
| 3 | 3 | 3 | 3 |
| 4 | 5 | 2 | 5 |
| 3 | 3 | 3 | 3 |
| 4 | 5 | 3 | 3 |
| 4 | 1 | 2 | 4 |
| 5 | 5 | 4 | 4 |
| 2 | 4 | 5 | 5 |
| 4 | 4 | 2 | 4 |
| 4 | 4 | 4 | 4 |
| 4 | 4 | 5 | 4 |
| 4 | 4 | 2 | 2 |
| 5 | 5 | 3 | 5 |
| 4 | 4 | 4 | 5 |
| 5 | 5 | 5 | 5 |
| 5 | 5 | 2 | 2 |
| 5 | 5 | 4 | 4 |
| 3 | 4 | 3 | 4 |
| 2 | 4 | 2 | 3 |
| 4 | 4 | 4 | 3 |
| 4 | 5 | 5 | 5 |
| 5 | 3 | 5 | 4 |
| 4 | 5 | 3 | 5 |

|   |   |   |   |
|---|---|---|---|
| 3 | 5 | 4 | 5 |
| 5 | 5 | 3 | 4 |
| 5 | 4 | 5 | 5 |
| 5 | 5 | 4 | 2 |
| 5 | 5 | 5 | 5 |
| 4 | 4 | 3 | 5 |
| 2 | 2 | 3 | 5 |
| 4 | 5 | 3 | 5 |
| 5 | 5 | 5 | 5 |
| 4 | 4 | 3 | 3 |
| 4 | 4 | 3 | 5 |
| 5 | 4 | 5 | 4 |
| 5 | 5 | 5 | 4 |
| 4 | 5 | 4 | 5 |
| 4 | 5 | 5 | 3 |
| 5 | 3 | 5 | 5 |
| 3 | 3 | 3 | 4 |
| 3 | 3 | 3 | 5 |
| 4 | 5 | 5 | 2 |
| 4 | 5 | 2 | 4 |
| 4 | 5 | 4 | 5 |
| 4 | 5 | 4 | 4 |
| 5 | 3 | 5 | 3 |
| 4 | 3 | 5 | 3 |
| 2 | 4 | 2 | 3 |
| 5 | 5 | 4 | 4 |
| 5 | 5 | 5 | 5 |
| 5 | 5 | 2 | 5 |
| 4 | 1 | 4 | 3 |
| 5 | 3 | 4 | 4 |
| 4 | 5 | 4 | 4 |
| 5 | 5 | 5 | 5 |
| 5 | 5 | 5 | 4 |
| 5 | 5 | 3 | 5 |
| 2 | 2 | 2 | 2 |
| 5 | 5 | 5 | 4 |
| 2 | 4 | 5 | 5 |
| 2 | 4 | 5 | 5 |
| 5 | 5 | 4 | 5 |
| 4 | 4 | 3 | 3 |
| 4 | 5 | 4 | 4 |
| 4 | 2 | 4 | 2 |
| 3 | 4 | 3 | 3 |
| 3 | 3 | 3 | 5 |
| 5 | 5 | 3 | 4 |
| 5 | 5 | 5 | 5 |
| 5 | 5 | 5 | 5 |
| 2 | 4 | 2 | 3 |

|    |    |    |    |
|----|----|----|----|
| 5  | 5  | 5  | 5  |
| 4  | 4  | 5  | 3  |
| 5  | 5  | 4  | 5  |
| 4  | 5  | 5  | 4  |
| 4  | 4  | 3  | 3  |
| 4  | 4  | 3  | 2  |
| 4  | 5  | 4  | 2  |
| 4  | 2  | 3  | 3  |
| 5  | 5  | 5  | 4  |
| 5  | 4  | 3  | 3  |
| 5  | 5  | 4  | 1  |
| 5  | 5  | 5  | 5  |
| 1  | 6  | 5  | 6  |
| 15 | 12 | 24 | 19 |
| 30 | 27 | 58 | 53 |
| 97 | 74 | 68 | 63 |
| 60 | 84 | 48 | 62 |







In your opinion, if not enough has been done to combat climate change in the 30 years since tr

4  
3  
3  
1  
3  
5  
4  
5  
5  
3  
2  
4  
4  
3  
4  
4  
4  
5  
4  
4  
4  
5  
5  
5  
4  
5  
5  
5  
3  
2  
5  
5  
2  
2  
5  
3  
5  
4  
3  
1  
5  
5  
4  
4  
5  
5  
4  
4  
3  
4

|  |   |
|--|---|
|  | 3 |
|  | 5 |
|  | 4 |
|  | 3 |
|  | 4 |
|  | 5 |
|  | 4 |
|  | 3 |
|  | 4 |
|  | 5 |
|  | 3 |
|  | 3 |
|  | 5 |
|  | 5 |
|  | 5 |
|  | 1 |
|  | 5 |
|  | 5 |
|  | 4 |
|  | 4 |
|  | 5 |
|  | 4 |
|  | 5 |
|  | 4 |
|  | 5 |
|  | 4 |
|  | 3 |
|  | 4 |
|  | 3 |
|  | 3 |
|  | 5 |
|  | 3 |
|  | 3 |
|  | 3 |
|  | 4 |
|  | 4 |
|  | 2 |
|  | 2 |
|  | 5 |
|  | 4 |
|  | 5 |
|  | 4 |
|  | 1 |
|  | 3 |
|  | 3 |
|  | 5 |
|  | 5 |
|  | 5 |

|  |   |
|--|---|
|  | 5 |
|  | 5 |
|  | 1 |
|  | 5 |
|  | 5 |
|  | 5 |
|  | 2 |
|  | 5 |
|  | 5 |
|  | 3 |
|  | 5 |
|  | 4 |
|  | 4 |
|  | 2 |
|  | 4 |
|  | 2 |
|  | 4 |
|  | 4 |
|  | 5 |
|  | 5 |
|  | 4 |
|  | 3 |
|  | 5 |
|  | 5 |
|  | 4 |
|  | 4 |
|  | 3 |
|  | 5 |
|  | 1 |
|  | 4 |
|  | 5 |
|  | 4 |
|  | 5 |
|  | 5 |
|  | 4 |
|  | 4 |
|  | 2 |
|  | 5 |
|  | 5 |
|  | 5 |
|  | 2 |
|  | 4 |
|  | 4 |
|  | 3 |
|  | 4 |
|  | 5 |
|  | 5 |
|  | 4 |

|  |   |
|--|---|
|  | 4 |
|  | 4 |
|  | 5 |
|  | 4 |
|  | 5 |
|  | 5 |
|  | 5 |
|  | 5 |
|  | 5 |
|  | 3 |
|  | 5 |
|  | 5 |
|  | 4 |
|  | 5 |
|  | 3 |
|  | 5 |
|  | 4 |
|  | 4 |
|  | 4 |
|  | 5 |
|  | 2 |
|  | 5 |
|  | 4 |
|  | 5 |
|  | 3 |
|  | 4 |
|  | 5 |
|  | 4 |
|  | 3 |
|  | 4 |
|  | 5 |
|  | 5 |
|  | 4 |
|  | 5 |
|  | 2 |
|  | 5 |
|  | 5 |
|  | 5 |
|  | 5 |
|  | 5 |
|  | 4 |
|  | 5 |
|  | 4 |
|  | 5 |
|  | 3 |
|  | 5 |
|  | 5 |
|  | 4 |

5

5

5

5

3

4

2

3

5

5

1

5

7

13

33

62

88

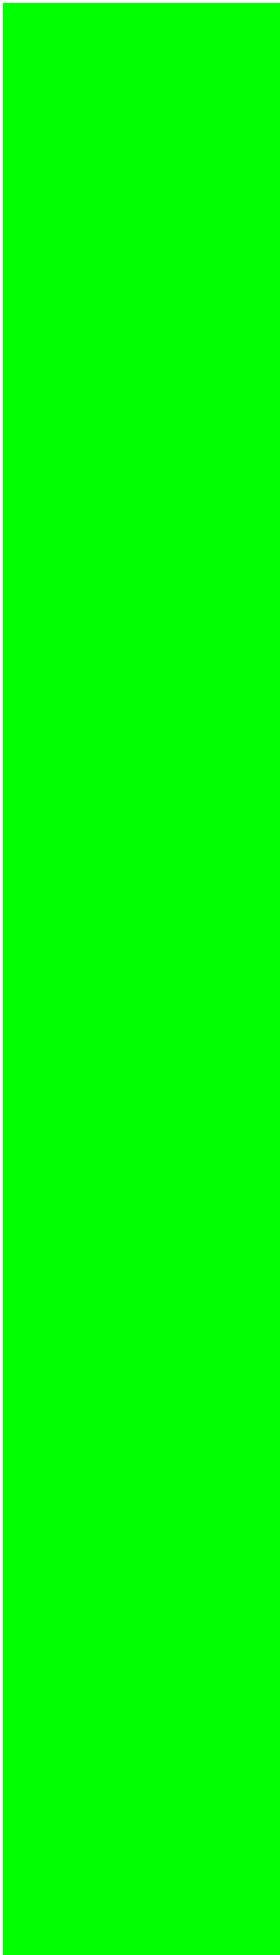



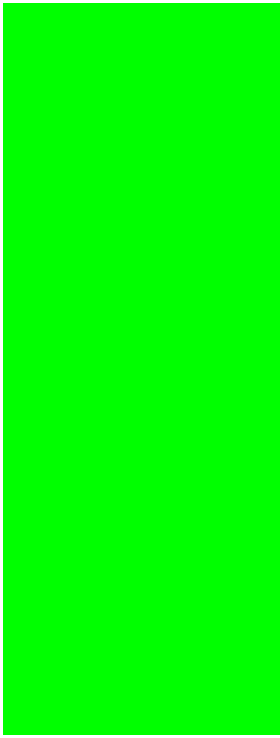

Supplement: Supplementary file 1 [file egusphere-2025-852-supplement.zip]
