# Supplementary material for: Broadcasting climate change: An international survey on weather communicators' approaches
Source: Copernicus journal article supplement (doi:10.5194/egusphere-2025-852), 2025-03-20
Supplement: Supplementary file 2 [file egusphere-2025-852-supplement.zip]

# CLIMATE CHANGE COMMUNICATION

Objective: To know the opinion of meteorology professionals from the media around the world, on aspects related to the communication of climate change to society.

This is a research that is part of my doctoral thesis

Approximate completion time: 10-15 minutes.

Thank you very much for your collaboration.

---

*\* Indica que la pregunta es obligatoria*

1. Correo \*

---

Data information

- The data collected complies with the European "General Data Protection Regulation" and will be used exclusively for research purposes.

2. You authorize your answers to be used for a scientific article \*

*Marca solo un óvalo.*

☐ Yes

☐ No

CLIMATE CHANGE COMMUNICATION

Data information

- The data collected complies with the European "General Data Protection Regulation" and will be used exclusively for research purposes.

3. You authorize your answers to be used for a scientific article \*

*Marca solo un óvalo.*

☐ Yes

☐ No

Personal information

4. You are \*

*Marca solo un óvalo.*

☐ Male

☐ Female

☐ Prefer not to say

5. Country \*

*Marca solo un óvalo.*

- ☐ Afghanistan
- ☐ Albania
- ☐ Algeria
- ☐ Andorra
- ☐ Angola
- ☐ Antigua and Barbuda
- ☐ Argentina
- ☐ Armenia
- ☐ Australia
- ☐ Austria
- ☐ Azerbaijan
- ☐ The Bahamas
- ☐ Bahrain
- ☐ Bangladesh
- ☐ Barbados
- ☐ Belarus
- ☐ Belgium
- ☐ Belize
- ☐ Benin
- ☐ Bhutan
- ☐ Bolivia
- ☐ Bosnia and Herzegovina
- ☐ Botswana
- ☐ Brazil
- ☐ Brunei
- ☐ Bulgaria
- ☐ Burkina Faso
- ☐ Burundi
- ☐ Cabo Verde
- ☐ Cambodia
- ☐ Cameroon
- ☐ Canada

- ☐ Central African Republic
- ☐ Chad
- ☐ Chile
- ☐ China
- ☐ Colombia
- ☐ Comoros
- ☐ Congo, Democratic Republic of the
- ☐ Congo, Republic of the
- ☐ Costa Rica
- ☐ Côte d'Ivoire
- ☐ Croatia
- ☐ Cuba
- ☐ Cyprus
- ☐ Czech Republic
- ☐ Denmark
- ☐ Djibouti
- ☐ Dominica
- ☐ Dominican Republic
- ☐ East Timor (Timor-Leste)
- ☐ Ecuador
- ☐ Egypt
- ☐ El Salvador
- ☐ Equatorial Guinea
- ☐ Eritrea
- ☐ Estonia
- ☐ Eswatini
- ☐ Ethiopia
- ☐ Fiji
- ☐ Finland
- ☐ France
- ☐ Gabon
- ☐ The Gambia
- ☐ Georgia
- ☐ Germany
- ☐ Ghana

- ☐ Greece
- ☐ Grenada
- ☐ Guatemala
- ☐ Guinea
- ☐ Guinea-Bissau
- ☐ Guyana
- ☐ Haiti
- ☐ Honduras
- ☐ Hungary
- ☐ Iceland
- ☐ India
- ☐ Indonesia
- ☐ Iran
- ☐ Iraq
- ☐ Ireland
- ☐ Israel
- ☐ Italy
- ☐ Jamaica
- ☐ Japan
- ☐ Jordan
- ☐ Kazakhstan
- ☐ Kenya
- ☐ Kiribati
- ☐ Korea, North
- ☐ Korea, South
- ☐ Kosovo
- ☐ Kuwait
- ☐ Kyrgyzstan
- ☐ Laos
- ☐ Latvia
- ☐ Lebanon
- ☐ Lesotho
- ☐ Liberia
- ☐ Libya
- ☐ Liechtenstein

- ☐ Lithuania
- ☐ Luxembourg
- ☐ Madagascar
- ☐ Malawi
- ☐ Malaysia
- ☐ Maldives
- ☐ Mali
- ☐ Malta
- ☐ Marshall Islands
- ☐ Mauritania
- ☐ Mauritius
- ☐ Mexico
- ☐ Micronesia, Federated States of
- ☐ Moldova
- ☐ Monaco
- ☐ Mongolia
- ☐ Montenegro
- ☐ Morocco
- ☐ Mozambique
- ☐ Myanmar (Burma)
- ☐ Namibia
- ☐ Nauru
- ☐ Nepal
- ☐ Netherlands
- ☐ New Zealand
- ☐ Nicaragua
- ☐ Niger
- ☐ Nigeria
- ☐ North Macedonia
- ☐ Norway
- ☐ Oman
- ☐ Pakistan
- ☐ Palau
- ☐ Panama
- ☐ Papua New Guinea

- ☐ Paraguay
- ☐ Peru
- ☐ Philippines
- ☐ Poland
- ☐ Portugal
- ☐ Qatar
- ☐ Romania
- ☐ Russia
- ☐ Rwanda
- ☐ Saint Kitts and Nevis
- ☐ Saint Lucia
- ☐ Saint Vincent and the Grenadines
- ☐ Samoa
- ☐ San Marino
- ☐ Sao Tome and Principe
- ☐ Saudi Arabia
- ☐ Senegal
- ☐ Serbia
- ☐ Seychelles
- ☐ Sierra Leone
- ☐ Singapore
- ☐ Slovakia
- ☐ Slovenia
- ☐ Solomon Islands
- ☐ Somalia
- ☐ South Africa
- ☐ Spain
- ☐ Sri Lanka
- ☐ Sudan
- ☐ Sudan, South
- ☐ Suriname
- ☐ Sweden
- ☐ Switzerland
- ☐ Syria
- ☐ Taiwan

- ☐ Tajikistan
- ☐ Tanzania
- ☐ Thailand
- ☐ Togo
- ☐ Tonga
- ☐ Trinidad and Tobago
- ☐ Tunisia
- ☐ Turkey
- ☐ Turkmenistan
- ☐ Tuvalu
- ☐ Uganda
- ☐ Ukraine
- ☐ United Arab Emirates
- ☐ United Kingdom
- ☐ United States
- ☐ Uruguay
- ☐ Uzbekistan
- ☐ Vanuatu
- ☐ Vatican City
- ☐ Venezuela
- ☐ Vietnam
- ☐ Yemen
- ☐ Zambia
- ☐ Zimbabwe



6. Your age \*

*Marca solo un óvalo.*

- ☐ 15 to 25 years
- ☐ 26 to 35 years
- ☐ 36 to 45 years
- ☐ 46 to 55 years
- ☐ 56 to 65 years
- ☐ 66 to 75 years
- ☐ 76 to 85 years
- ☐ More than 86 years

7. Which option better define for main occupation? \*

Please choose the one that better fits your principal professional career.

*Marca solo un óvalo.*

- ☐ Public TV
- ☐ Private TV
- ☐ Radio
- ☐ Printed Press
- ☐ Internet news site
- ☐ Weather Service
- ☐ Private Meteorological Company
- ☐ Youtube
- ☐ Social Networks
- ☐ Otro: \_\_\_\_\_

8. How many years have you been working in the field of weather and/or climate communication? \*

*Marca solo un óvalo.*

- ☐ 1 to 10 years  
☐ 11 to 20 years  
☐ 21 to 30 years  
☐ More than 30 years

9. Besides your principal occupation, choose other communication channels and/or social networks that you are actually using. \*

*Selecciona todos los que correspondan.*

- ☐ Public TV  
☐ Private TV  
☐ Radio  
☐ Printed press  
☐ Internet news site  
☐ Weather Service  
☐ Private Meteorological Company  
☐ Youtube  
☐ Personal Blog  
☐ Twitter  
☐ Facebook  
☐ Instagram  
☐ Linkedin  
☐ Qzone  
☐ Baidu Tieba  
☐ Sina Weibo  
☐ Tik Tok  
☐ Telegram  
☐ Whatsapp  
☐ Twitch  
☐ Discord  
☐ Slack  
☐ Otro: \_\_\_\_\_

10. Which is your principal background? \*

*Selecciona todos los que correspondan.*

- ☐ Meteorology/Atmospheric Science
- ☐ Physics/Maths
- ☐ Engineering
- ☐ Geography/Climatology
- ☐ Journalism
- ☐ Arts/interpretation
- ☐ Social Sciences
- ☐ Human Sciences
- ☐ Other university degrees
- ☐ No university degree

Level of knowledge about Climate Change

Please assess the following issues to the best of your knowledge.

(1 Very low - 5 Very good)

11. What degree of knowledge do you have about the scientific aspects of Climate Change and its possible consequences at a general level? \*

*Marca solo un óvalo.*

1   2   3   4   5

Very ☐ ☐ ☐ ☐ ☐ Very good

12. What degree of information do you have about Climate Change and its consequences in your country / region? \*

*Marca solo un óvalo.*

1   2   3   4   5

Very ☐ ☐ ☐ ☐ ☐ Very good

13. What degree of knowledge do you have at reporting on Climate Change? \*

*Marca solo un óvalo.*

|      |                       |                       |                       |                       |                       |           |
|------|-----------------------|-----------------------|-----------------------|-----------------------|-----------------------|-----------|
|      | 1                     | 2                     | 3                     | 4                     | 5                     |           |
| Very | <input type="radio"/> | Very good |

14. How much do you agree with the phrase: Climate Change is a sham/hoax? \*

*Marca solo un óvalo.*

|      |                       |                       |                       |                       |                       |                |
|------|-----------------------|-----------------------|-----------------------|-----------------------|-----------------------|----------------|
|      | 1                     | 2                     | 3                     | 4                     | 5                     |                |
| Stro | <input type="radio"/> | Strongly agree |

Please rate your degree of agreement with the following statements.

(1: Strongly disagree; 2: Disagree; 3: Neither agree nor disagree; 4: Agree; 5: Strongly agree)

15. The climate in my area has changed in recent years \*

*Marca solo un óvalo.*

|      |                       |                       |                       |                       |                       |                |
|------|-----------------------|-----------------------|-----------------------|-----------------------|-----------------------|----------------|
|      | 1                     | 2                     | 3                     | 4                     | 5                     |                |
| Stro | <input type="radio"/> | Strongly agree |

16. The impacts of climate change in recent years in my area have been negative \*

*Marca solo un óvalo.*

|      |                       |                       |                       |                       |                       |                |
|------|-----------------------|-----------------------|-----------------------|-----------------------|-----------------------|----------------|
|      | 1                     | 2                     | 3                     | 4                     | 5                     |                |
| Stro | <input type="radio"/> | Strongly agree |

17. Some effects of Climate Change can be reversed if mitigation measures are taken on a global scale \*

*Marca solo un óvalo.*

1 2 3 4 5

Stro ☐ ☐ ☐ ☐ ☐ Strongly agree

18. When speaking about Global Warming, you feel... \*

*Marca solo un óvalo.*

- ☐ Alarmed  
☐ Concerned  
☐ Cautious  
☐ Disengaged  
☐ Doubtful  
☐ Dismissive

19. Have you ever read any of the reports produced by the Intergovernmental Panel on Climate Change (IPCC)? \*

*Marca solo un óvalo.*

- ☐ Yes  
☐ No  
☐ I don't know them

20. Which of the following IPCC reports do you recall consulting? \*

*Selecciona todos los que correspondan.*

- ☐ IPCC FAR 1990
- ☐ IPCC SAR 1995
- ☐ IPCC TAR 2001
- ☐ IPCC AR4 2007
- ☐ IPCC AR5 2014
- ☐ SPECIAL REPORT GLOBAL WARMING OF 1,5°C
- ☐ None of them

21. Regarding the process of preparation, writing and approval of the different IPCC reports, <sup>\*</sup> indicate your degree of agreement with the following statements  
(1: Strongly disagree; 2: Disagree; 3: Neither agree nor disagree; 4: Agree; 5: Strongly agree)

*Marca solo un óvalo por fila.*

|                                                                                  | 1                     | 2                     | 3                     | 4                     | 5                     |
|----------------------------------------------------------------------------------|-----------------------|-----------------------|-----------------------|-----------------------|-----------------------|
| <b>IPCC reports are affected by political interference</b>                       | <input type="radio"/> |
| <b>IPCC reports include the latest scientific findings</b>                       | <input type="radio"/> |
| <b>IPCC reports are understandable to the general public</b>                     | <input type="radio"/> |
| <b>IPCC reports actively influence politicians and decision makers</b>           | <input type="radio"/> |
| <b>IPCC reports actively influence society at large</b>                          | <input type="radio"/> |
| <b>IPCC reports meet my expectations of what I would expect from the reports</b> | <input type="radio"/> |
| <b>IPCC reports are reliable</b>                                                 | <input type="radio"/> |

22. What are your main sources of information on climate change? \*  
(1: Never; 5: Very often)

Marca solo un óvalo por fila.

|                                            | 1                     | 2                     | 3                     | 4                     | 5                     |
|--------------------------------------------|-----------------------|-----------------------|-----------------------|-----------------------|-----------------------|
| <b>IPCC assessments</b>                    | <input type="radio"/> |
| <b>Official reports (government, etc.)</b> | <input type="radio"/> |
| <b>Scientific magazines</b>                | <input type="radio"/> |
| <b>Specialized congresses</b>              | <input type="radio"/> |
| <b>Social Networks</b>                     | <input type="radio"/> |
| <b>Press</b>                               | <input type="radio"/> |
| <b>TV</b>                                  | <input type="radio"/> |
| <b>Wikipedia</b>                           | <input type="radio"/> |

23. Other, please specify

\_\_\_\_\_

24. In your opinion, what would be the best indicator that climate change is occurring in your country?

\_\_\_\_\_

\_\_\_\_\_

\_\_\_\_\_

\_\_\_\_\_

\_\_\_\_\_



25. Please rate your degree of agreement with the following statements. \*
- (1: Strongly disagree; 2: Disagree; 3: Neither agree nor disagree; 4: Agree; 5: Strongly agree)

*Marca solo un óvalo por fila.*

|                                                                                                             | 1                     | 2                     | 3                     | 4                     | 5                     |
|-------------------------------------------------------------------------------------------------------------|-----------------------|-----------------------|-----------------------|-----------------------|-----------------------|
| <b>I report on climate change in my media</b>                                                               | <input type="radio"/> |
| <b>My audience is well informed about climate change.</b>                                                   | <input type="radio"/> |
| <b>Reporting on climate change has political implications</b>                                               | <input type="radio"/> |
| <b>I include less information on climate change due to political or economic pressures</b>                  | <input type="radio"/> |
| <b>I change the orientation of the information on climate change due to political or economic pressures</b> | <input type="radio"/> |

26. How often do you report on Climate Change in ...? \*

Marca solo un óvalo por fila.

|                                                             | Never                 | Sporadically          | Monthly               | Weekly                | Every day             |
|-------------------------------------------------------------|-----------------------|-----------------------|-----------------------|-----------------------|-----------------------|
| <b>In your own weather segment/programm</b>                 | <input type="radio"/> |
| <b>in a program different from your own weather segment</b> | <input type="radio"/> |
| <b>In your Media's Social Media Networks</b>                | <input type="radio"/> |
| <b>In your own Social Networks</b>                          | <input type="radio"/> |
| <b>On visits to schools</b>                                 | <input type="radio"/> |
| <b>On organizations in your community</b>                   | <input type="radio"/> |
| <b>On visits to the elderly</b>                             | <input type="radio"/> |

27. If you do not report sufficiently on Climate Change, the reason is \*  
(1: Strongly disagree; 2: Disagree; 3: Neither agree nor disagree; 4: Agree; 5: Strongly agree)

*Marca solo un óvalo por fila.*

|                                                   | 1                     | 2                     | 3                     | 4                     | 5                     |
|---------------------------------------------------|-----------------------|-----------------------|-----------------------|-----------------------|-----------------------|
| <b>I do not have time</b>                         | <input type="radio"/> |
| <b>It does not interest my editors/directors</b>  | <input type="radio"/> |
| <b>It does not interest my audience</b>           | <input type="radio"/> |
| <b>It does not interest my sponsors</b>           | <input type="radio"/> |
| <b>It causes rejection in my sponsors</b>         | <input type="radio"/> |
| <b>It causes negative feedback in my audience</b> | <input type="radio"/> |

28. How do you think the communication of Climate Change would be more effective?

29. Under what conditions are your directors / editors most willing to report on Climate Change?

\*

Marca solo un óvalo.

- ☐ Always
- ☐ Never
- ☐ When an extreme weather event occurs
- ☐ When a study appears about it
- ☐ Only when there are international meetings like the COP in Paris
- ☐ Otro: \_\_\_\_\_

30. Where do you express your personal opinion on Climate Change? \*

Marca solo un óvalo por fila.

|                                     | 1<br>(Never)          | 2                     | 3                     | 4                     | 5<br>(Always)         |
|-------------------------------------|-----------------------|-----------------------|-----------------------|-----------------------|-----------------------|
| On air in your own weather segment  | <input type="radio"/> |
| In your personal Social Networks    | <input type="radio"/> |
| In my media company social networks | <input type="radio"/> |
| In talks or conferences             | <input type="radio"/> |
| On air in other programs not my own | <input type="radio"/> |

Rate your degree of agreement with the following statements

(1: Strongly disagree; 2: Disagree; 3: Neither agree nor disagree; 4: Agree; 5: Strongly agree)

31. The amount of information that the media has offered to society about climate change so far, corresponds to the importance of the problem \*

*Marca solo un óvalo.*

1 2 3 4 5

Stro ☐ ☐ ☐ ☐ ☐ Strongly agree

32. The information that the media has offered to society about climate change so far, is correct, balanced and accurate. \*

*Marca solo un óvalo.*

1 2 3 4 5

Stro ☐ ☐ ☐ ☐ ☐ Strongly agree

33. What is the main difficulty in communicating climate change issues? \*
- (1: Strongly disagree; 2: Disagree; 3: Neither agree nor disagree; 4: Agree; 5: Strongly agree)

Marca solo un óvalo por fila.

|                                                                               | 1                     | 2                     | 3                     | 4                     | 5                     |
|-------------------------------------------------------------------------------|-----------------------|-----------------------|-----------------------|-----------------------|-----------------------|
| <b>The cultural level of society</b>                                          | <input type="radio"/> |
| <b>The self-interested disinformation of climate change denialist lobbies</b> | <input type="radio"/> |
| <b>Political pressure and interference</b>                                    | <input type="radio"/> |
| <b>The scientific complexity of the reports</b>                               | <input type="radio"/> |
| <b>The fact of being a very repetitive information</b>                        | <input type="radio"/> |
| <b>The possibility of falling into fatalism</b>                               | <input type="radio"/> |
| <b>The person in charge of explaining it</b>                                  | <input type="radio"/> |

34. Other, please specify
- \_\_\_\_\_

35. Who would be the most appropriate communicator to spread knowledge about climate change to society? \*

(1: Strongly disagree; 2: Disagree; 3: Neither agree nor disagree; 4: Agree; 5: Strongly agree)

Marca solo un óvalo por fila.

|                       | 1                     | 2                     | 3                     | 4                     | 5                     |
|-----------------------|-----------------------|-----------------------|-----------------------|-----------------------|-----------------------|
| Family                | <input type="radio"/> |
| School                | <input type="radio"/> |
| Church                | <input type="radio"/> |
| Journalists           | <input type="radio"/> |
| Government            | <input type="radio"/> |
| Weather presenters    | <input type="radio"/> |
| The empowered society | <input type="radio"/> |
| Social Networks       | <input type="radio"/> |
| It is not necessary   | <input type="radio"/> |
| The scientists        | <input type="radio"/> |
| Politicians           | <input type="radio"/> |

36. Other, please specify

\_\_\_\_\_

37. What would be a good indicator of climate change? \*

(1: Strongly disagree; 2: Disagree; 3: Neither agree nor disagree; 4: Agree; 5: Strongly agree)

Marca solo un óvalo por fila.

|                                                     | 1                     | 2                     | 3                     | 4                     | 5                     |
|-----------------------------------------------------|-----------------------|-----------------------|-----------------------|-----------------------|-----------------------|
| The quality of water available to society           | <input type="radio"/> |
| Pollution of rivers and seas                        | <input type="radio"/> |
| The amount of water available to society            | <input type="radio"/> |
| Ambient temperature                                 | <input type="radio"/> |
| Changes in sea level                                | <input type="radio"/> |
| Invasive species                                    | <input type="radio"/> |
| The degree of social alarm Climate Change generates | <input type="radio"/> |
| The atmospheric pollution                           | <input type="radio"/> |
| There is no Climate Change                          | <input type="radio"/> |



38. Other, please specify

---

39. What would be the most appropriate message on Climate Change to spread to society? \*
- (1: Strongly disagree; 2: Disagree; 3: Neither agree nor disagree; 4: Agree; 5: Strongly agree)

*Marca solo un óvalo por fila.*

|                                                       | 1                     | 2                     | 3                     | 4                     | 5                     |
|-------------------------------------------------------|-----------------------|-----------------------|-----------------------|-----------------------|-----------------------|
| <b>We are in a Climate Emergency</b>                  | <input type="radio"/> |
| <b>We are in a Climate Crisis</b>                     | <input type="radio"/> |
| <b>We are in a Climate Catastrophe</b>                | <input type="radio"/> |
| <b>We can avoid climate change</b>                    | <input type="radio"/> |
| <b>We can reduce Climate Change</b>                   | <input type="radio"/> |
| <b>A message of hope</b>                              | <input type="radio"/> |
| <b>A message that scares people</b>                   | <input type="radio"/> |
| <b>A realistic message</b>                            | <input type="radio"/> |
| <b>A change in the economic model is necessary</b>    | <input type="radio"/> |
| <b>Technology alone will not solve Climate Change</b> | <input type="radio"/> |

Climate  
change  
does not  
exist

|                       |                       |                       |                       |                       |
|-----------------------|-----------------------|-----------------------|-----------------------|-----------------------|
| <input type="radio"/> |
|-----------------------|-----------------------|-----------------------|-----------------------|-----------------------|

40. Other, please specify

---

41. What do you think climate change should be broadly called? \*

(1: Strongly disagree; 2: Disagree; 3: Neither agree nor disagree; 4: Agree; 5: Strongly agree)

*Marca solo un óvalo por fila.*

|                           | 1                     | 2                     | 3                     | 4                     | 5                     |
|---------------------------|-----------------------|-----------------------|-----------------------|-----------------------|-----------------------|
| <b>Climate<br/>Change</b> | <input type="radio"/> |
| <b>Global<br/>Warming</b> | <input type="radio"/> |

42. Please, specify if you have other options

---

43. In your opinion, who is more directly responsible for the fight against climate change? \*  
(1: Strongly disagree; 2: Disagree; 3: Neither agree nor disagree; 4: Agree; 5: Strongly agree)

*Marca solo un óvalo por fila.*

|                                    | 1                     | 2                     | 3                     | 4                     | 5                     |
|------------------------------------|-----------------------|-----------------------|-----------------------|-----------------------|-----------------------|
| <b>The government</b>              | <input type="radio"/> |
| <b>Society</b>                     | <input type="radio"/> |
| <b>Myself</b>                      | <input type="radio"/> |
| <b>Polluting industries</b>        | <input type="radio"/> |
| <b>Political parties</b>           | <input type="radio"/> |
| <b>Countries</b>                   | <input type="radio"/> |
| <b>Companies</b>                   | <input type="radio"/> |
| <b>International Organizations</b> | <input type="radio"/> |
| <b>Church</b>                      | <input type="radio"/> |
| <b>Press</b>                       | <input type="radio"/> |
| <b>Farm people</b>                 | <input type="radio"/> |

44. Other, please specify
- \_\_\_\_\_

45. In your opinion, which channel would be the most effective to sensitize society about climate change? \*

(1: Strongly disagree; 2: Disagree; 3: Neither agree nor disagree; 4: Agree; 5: Strongly agree)

Marca solo un óvalo por fila.

|                               | 1                     | 2                     | 3                     | 4                     | 5                     |
|-------------------------------|-----------------------|-----------------------|-----------------------|-----------------------|-----------------------|
| Television                    | <input type="radio"/> |
| General press                 | <input type="radio"/> |
| Websites in internet          | <input type="radio"/> |
| The religious leader's sermon | <input type="radio"/> |
| Social Networks               | <input type="radio"/> |
| Every citizen speech          | <input type="radio"/> |
| Plays and movies              | <input type="radio"/> |
| Artistic works                | <input type="radio"/> |
| New contents in new media     | <input type="radio"/> |

46. Other, please specify

\_\_\_\_\_

47. What instrument (or resource) would allow for faster progress in the fight against climate change? \*
- (1: Strongly disagree; 2: Disagree; 3: Neither agree nor disagree; 4: Agree; 5: Strongly agree)

*Marca solo un óvalo por fila.*

|                                                 | 1                     | 2                     | 3                     | 4                     | 5                     |
|-------------------------------------------------|-----------------------|-----------------------|-----------------------|-----------------------|-----------------------|
| <b>A more informed society</b>                  | <input type="radio"/> |
| <b>Penalties and fines</b>                      | <input type="radio"/> |
| <b>National regulations</b>                     | <input type="radio"/> |
| <b>International agreements</b>                 | <input type="radio"/> |
| <b>Technology</b>                               | <input type="radio"/> |
| <b>Changes in the economy</b>                   | <input type="radio"/> |
| <b>Progress is already being made correctly</b> | <input type="radio"/> |

48. Other, please specify
- \_\_\_\_\_

49. Rate your level of agreement with the following statements about climate change. \*
- (1: Strongly disagree; 2: Disagree; 3: Neither agree nor disagree; 4: Agree; 5: Strongly agree)

*Marca solo un óvalo por fila.*

|                                                                                                      | 1                     | 2                     | 3                     | 4                     | 5                     |
|------------------------------------------------------------------------------------------------------|-----------------------|-----------------------|-----------------------|-----------------------|-----------------------|
| <b>It's a problem<br/>humanity has<br/>right now</b>                                                 | <input type="radio"/> |
| <b>I worry about<br/>how it may<br/>affect my<br/>grandchildren</b>                                  | <input type="radio"/> |
| <b>We are<br/>leaving a<br/>problem for<br/>our children</b>                                         | <input type="radio"/> |
| <b>There are<br/>other more<br/>important<br/>problems<br/>that need to<br/>be solved<br/>before</b> | <input type="radio"/> |

50. In your country, with respect to the rest of the world, how you rate the opinion on the need to fight against climate change \*

*Marca solo un óvalo.*

- ☐ Is higher
- ☐ same
- ☐ Is lower
- ☐ We don't need to fight against climate change

51. In your country, the difference in awareness of the need to fight against climate change compared to the rest of the world is due to... \*

(1: Strongly disagree; 2: Disagree; 3: Neither agree nor disagree; 4: Agree; 5: Strongly agree)

*Marca solo un óvalo por fila.*

|                                                    | 1                     | 2                     | 3                     | 4                     | 5                     |
|----------------------------------------------------|-----------------------|-----------------------|-----------------------|-----------------------|-----------------------|
| <b>The highest level of training in my country</b> | <input type="radio"/> |
| <b>The best level of employment in my country</b>  | <input type="radio"/> |
| <b>A better informed society</b>                   | <input type="radio"/> |
| <b>Political motives</b>                           | <input type="radio"/> |
| <b>Religious motives</b>                           | <input type="radio"/> |
| <b>Corruption</b>                                  | <input type="radio"/> |



52. In your opinion, if not enough has been done to combat climate change in the 30 years since the publication of the first IPCC report in 1990, it is because: \*
- (1: Strongly disagree; 2: Disagree; 3: Neither agree nor disagree; 4: Agree; 5: Strongly agree)

*Marca solo un óvalo por fila.*

|                                                        | 1                     | 2                     | 3                     | 4                     | 5                     |
|--------------------------------------------------------|-----------------------|-----------------------|-----------------------|-----------------------|-----------------------|
| <b>Not enough was known about Climate Change</b>       | <input type="radio"/> |
| <b>Society has not been involved enough</b>            | <input type="radio"/> |
| <b>Governments have not been involved enough</b>       | <input type="radio"/> |
| <b>Information to society has failed</b>               | <input type="radio"/> |
| <b>Geopolitics and globalization have prevented it</b> | <input type="radio"/> |
| <b>Economic pressures have prevented it</b>            | <input type="radio"/> |

Results of the Survey

53. Do you want to receive the results of the survey? \*

*Marca solo un óvalo.*

☐ Yes

☐ No

54. If yes, enter your name

---

55. If yes, enter your email address

---

Personal information

56. You are \*

*Marca solo un óvalo.*

☐ Male

☐ Female

☐ Prefer not to say

57. Country \*

*Marca solo un óvalo.*

- ☐ Afghanistan
- ☐ Albania
- ☐ Algeria
- ☐ Andorra
- ☐ Angola
- ☐ Antigua and Barbuda
- ☐ Argentina
- ☐ Armenia
- ☐ Australia
- ☐ Austria
- ☐ Azerbaijan
- ☐ The Bahamas
- ☐ Bahrain
- ☐ Bangladesh
- ☐ Barbados
- ☐ Belarus
- ☐ Belgium
- ☐ Belize
- ☐ Benin
- ☐ Bhutan
- ☐ Bolivia
- ☐ Bosnia and Herzegovina
- ☐ Botswana
- ☐ Brazil
- ☐ Brunei
- ☐ Bulgaria
- ☐ Burkina Faso
- ☐ Burundi
- ☐ Cabo Verde
- ☐ Cambodia
- ☐ Cameroon
- ☐ Canada

- ☐ Central African Republic
- ☐ Chad
- ☐ Chile
- ☐ China
- ☐ Colombia
- ☐ Comoros
- ☐ Congo, Democratic Republic of the
- ☐ Congo, Republic of the
- ☐ Costa Rica
- ☐ Côte d'Ivoire
- ☐ Croatia
- ☐ Cuba
- ☐ Cyprus
- ☐ Czech Republic
- ☐ Denmark
- ☐ Djibouti
- ☐ Dominica
- ☐ Dominican Republic
- ☐ East Timor (Timor-Leste)
- ☐ Ecuador
- ☐ Egypt
- ☐ El Salvador
- ☐ Equatorial Guinea
- ☐ Eritrea
- ☐ Estonia
- ☐ Eswatini
- ☐ Ethiopia
- ☐ Fiji
- ☐ Finland
- ☐ France
- ☐ Gabon
- ☐ The Gambia
- ☐ Georgia
- ☐ Germany
- ☐ Ghana

- ☐ Greece
- ☐ Grenada
- ☐ Guatemala
- ☐ Guinea
- ☐ Guinea-Bissau
- ☐ Guyana
- ☐ Haiti
- ☐ Honduras
- ☐ Hungary
- ☐ Iceland
- ☐ India
- ☐ Indonesia
- ☐ Iran
- ☐ Iraq
- ☐ Ireland
- ☐ Israel
- ☐ Italy
- ☐ Jamaica
- ☐ Japan
- ☐ Jordan
- ☐ Kazakhstan
- ☐ Kenya
- ☐ Kiribati
- ☐ Korea, North
- ☐ Korea, South
- ☐ Kosovo
- ☐ Kuwait
- ☐ Kyrgyzstan
- ☐ Laos
- ☐ Latvia
- ☐ Lebanon
- ☐ Lesotho
- ☐ Liberia
- ☐ Libya
- ☐ Liechtenstein

- ☐ Lithuania
- ☐ Luxembourg
- ☐ Madagascar
- ☐ Malawi
- ☐ Malaysia
- ☐ Maldives
- ☐ Mali
- ☐ Malta
- ☐ Marshall Islands
- ☐ Mauritania
- ☐ Mauritius
- ☐ Mexico
- ☐ Micronesia, Federated States of
- ☐ Moldova
- ☐ Monaco
- ☐ Mongolia
- ☐ Montenegro
- ☐ Morocco
- ☐ Mozambique
- ☐ Myanmar (Burma)
- ☐ Namibia
- ☐ Nauru
- ☐ Nepal
- ☐ Netherlands
- ☐ New Zealand
- ☐ Nicaragua
- ☐ Niger
- ☐ Nigeria
- ☐ North Macedonia
- ☐ Norway
- ☐ Oman
- ☐ Pakistan
- ☐ Palau
- ☐ Panama
- ☐ Papua New Guinea

- ☐ Paraguay
- ☐ Peru
- ☐ Philippines
- ☐ Poland
- ☐ Portugal
- ☐ Qatar
- ☐ Romania
- ☐ Russia
- ☐ Rwanda
- ☐ Saint Kitts and Nevis
- ☐ Saint Lucia
- ☐ Saint Vincent and the Grenadines
- ☐ Samoa
- ☐ San Marino
- ☐ Sao Tome and Principe
- ☐ Saudi Arabia
- ☐ Senegal
- ☐ Serbia
- ☐ Seychelles
- ☐ Sierra Leone
- ☐ Singapore
- ☐ Slovakia
- ☐ Slovenia
- ☐ Solomon Islands
- ☐ Somalia
- ☐ South Africa
- ☐ Spain
- ☐ Sri Lanka
- ☐ Sudan
- ☐ Sudan, South
- ☐ Suriname
- ☐ Sweden
- ☐ Switzerland
- ☐ Syria
- ☐ Taiwan

- ☐ Tajikistan
- ☐ Tanzania
- ☐ Thailand
- ☐ Togo
- ☐ Tonga
- ☐ Trinidad and Tobago
- ☐ Tunisia
- ☐ Turkey
- ☐ Turkmenistan
- ☐ Tuvalu
- ☐ Uganda
- ☐ Ukraine
- ☐ United Arab Emirates
- ☐ United Kingdom
- ☐ United States
- ☐ Uruguay
- ☐ Uzbekistan
- ☐ Vanuatu
- ☐ Vatican City
- ☐ Venezuela
- ☐ Vietnam
- ☐ Yemen
- ☐ Zambia
- ☐ Zimbabwe



58. Your age \*

*Marca solo un óvalo.*

- ☐ 15 to 25 years
- ☐ 26 to 35 years
- ☐ 36 to 45 years
- ☐ 46 to 55 years
- ☐ 56 to 65 years
- ☐ 66 to 75 years
- ☐ 76 to 85 years
- ☐ More than 86 years

59. Which option better define for main occupation? \*

Please choose the one that better fits your principal professional career.

*Marca solo un óvalo.*

- ☐ Public TV
- ☐ Private TV
- ☐ Radio
- ☐ Printed Press
- ☐ Internet news site
- ☐ Weather Service
- ☐ Private Meteorological Company
- ☐ Youtube
- ☐ Social Networks
- ☐ Otro: \_\_\_\_\_

60. How many years have you been working in the field of weather and/or climate communication? \*

*Marca solo un óvalo.*

- ☐ 1 to 10 years
- ☐ 11 to 20 years
- ☐ 21 to 30 years
- ☐ More than 30 years

61. Besides your principal occupation, choose other communication channels and/or social networks that you are actually using. \*

*Selecciona todos los que correspondan.*

- ☐ Public TV
- ☐ Private TV
- ☐ Radio
- ☐ Printed press
- ☐ Internet news site
- ☐ Weather Service
- ☐ Private Meteorological Company
- ☐ Youtube
- ☐ Personal Blog
- ☐ Twitter
- ☐ Facebook
- ☐ Instagram
- ☐ Linkedin
- ☐ Qzone
- ☐ Baidu Tieba
- ☐ Sina Weibo
- ☐ Tik Tok
- ☐ Telegram
- ☐ Whatsapp
- ☐ Twitch
- ☐ Discord
- ☐ Slack
- ☐ Otro: \_\_\_\_\_

62. Which is your principal background? \*

*Selecciona todos los que correspondan.*

- ☐ Meteorology/Atmospheric Science
- ☐ Physics/Maths
- ☐ Engineering
- ☐ Geography/Climatology
- ☐ Journalism
- ☐ Arts/interpretation
- ☐ Social Sciences
- ☐ Human Sciences
- ☐ Other university degrees
- ☐ No university degree

Level of knowledge about Climate Change

Please assess the following issues to the best of your knowledge.

(1 Very low - 5 Very good)

63. What degree of knowledge do you have about the scientific aspects of Climate Change and its possible consequences at a general level? \*

*Marca solo un óvalo.*

1   2   3   4   5

Very ☐ ☐ ☐ ☐ ☐ Very good

64. What degree of information do you have about Climate Change and its consequences in your country / region? \*

*Marca solo un óvalo.*

1   2   3   4   5

Very ☐ ☐ ☐ ☐ ☐ Very good

65. What degree of knowledge do you have at reporting on Climate Change? \*

*Marca solo un óvalo.*

1 2 3 4 5

Very ☐ ☐ ☐ ☐ ☐ Very good

66. How much do you agree with the phrase: Climate Change is a sham/hoax? \*

*Marca solo un óvalo.*

1 2 3 4 5

Stro ☐ ☐ ☐ ☐ ☐ Strongly agree

Please rate your degree of agreement with the following statements.

(1: Strongly disagree; 2: Disagree; 3: Neither agree nor disagree; 4: Agree; 5: Strongly agree)

67. The climate in my area has changed in recent years \*

*Marca solo un óvalo.*

1 2 3 4 5

Stro ☐ ☐ ☐ ☐ ☐ Strongly agree

68. The impacts of climate change in recent years in my area have been negative \*

*Marca solo un óvalo.*

1 2 3 4 5

Stro ☐ ☐ ☐ ☐ ☐ Strongly agree

69. Some effects of Climate Change can be reversed if mitigation measures are taken on a global scale \*

*Marca solo un óvalo.*

1 2 3 4 5

Stro ☐ ☐ ☐ ☐ ☐ Strongly agree

70. When speaking about Global Warming, you feel... \*

*Marca solo un óvalo.*

- ☐ Alarmed  
☐ Concerned  
☐ Cautious  
☐ Disengaged  
☐ Doubtful  
☐ Dismissive

71. Have you ever read any of the reports produced by the Intergovernmental Panel on Climate Change (IPCC)? \*

*Marca solo un óvalo.*

- ☐ Yes  
☐ No  
☐ I don't know them

72. Which of the following IPCC reports do you recall consulting? \*

*Selecciona todos los que correspondan.*

- ☐ IPCC FAR 1990
- ☐ IPCC SAR 1995
- ☐ IPCC TAR 2001
- ☐ IPCC AR4 2007
- ☐ IPCC AR5 2014
- ☐ SPECIAL REPORT GLOBAL WARMING OF 1,5°C
- ☐ None of them

73. Regarding the process of preparation, writing and approval of the different IPCC reports, <sup>\*</sup> indicate your degree of agreement with the following statements  
(1: Strongly disagree; 2: Disagree; 3: Neither agree nor disagree; 4: Agree; 5: Strongly agree)

*Marca solo un óvalo por fila.*

|                                                                                  | 1                     | 2                     | 3                     | 4                     | 5                     |
|----------------------------------------------------------------------------------|-----------------------|-----------------------|-----------------------|-----------------------|-----------------------|
| <b>IPCC reports are affected by political interference</b>                       | <input type="radio"/> |
| <b>IPCC reports include the latest scientific findings</b>                       | <input type="radio"/> |
| <b>IPCC reports are understandable to the general public</b>                     | <input type="radio"/> |
| <b>IPCC reports actively influence politicians and decision makers</b>           | <input type="radio"/> |
| <b>IPCC reports actively influence society at large</b>                          | <input type="radio"/> |
| <b>IPCC reports meet my expectations of what I would expect from the reports</b> | <input type="radio"/> |
| <b>IPCC reports are reliable</b>                                                 | <input type="radio"/> |

74. What are your main sources of information on climate change? \*  
(1: Never; 5: Very often)

Marca solo un óvalo por fila.

|                                            | 1                     | 2                     | 3                     | 4                     | 5                     |
|--------------------------------------------|-----------------------|-----------------------|-----------------------|-----------------------|-----------------------|
| <b>IPCC assessments</b>                    | <input type="radio"/> |
| <b>Official reports (government, etc.)</b> | <input type="radio"/> |
| <b>Scientific magazines</b>                | <input type="radio"/> |
| <b>Specialized congresses</b>              | <input type="radio"/> |
| <b>Social Networks</b>                     | <input type="radio"/> |
| <b>Press</b>                               | <input type="radio"/> |
| <b>TV</b>                                  | <input type="radio"/> |
| <b>Wikipedia</b>                           | <input type="radio"/> |

75. Other, please specify

\_\_\_\_\_

76. In your opinion, what would be the best indicator that climate change is occurring in your country?

\_\_\_\_\_

\_\_\_\_\_

\_\_\_\_\_

\_\_\_\_\_

\_\_\_\_\_



77. Please rate your degree of agreement with the following statements. \*

(1: Strongly disagree; 2: Disagree; 3: Neither agree nor disagree; 4: Agree; 5: Strongly agree)

Marca solo un óvalo por fila.

|                                                                                                             | 1                     | 2                     | 3                     | 4                     | 5                     |
|-------------------------------------------------------------------------------------------------------------|-----------------------|-----------------------|-----------------------|-----------------------|-----------------------|
| <b>I report on climate change in my media</b>                                                               | <input type="radio"/> |
| <b>My audience is well informed about climate change.</b>                                                   | <input type="radio"/> |
| <b>Reporting on climate change has political implications</b>                                               | <input type="radio"/> |
| <b>I include less information on climate change due to political or economic pressures</b>                  | <input type="radio"/> |
| <b>I change the orientation of the information on climate change due to political or economic pressures</b> | <input type="radio"/> |

78. How often do you report on Climate Change in ...? \*

*Marca solo un óvalo por fila.*

|                                                             | Never                 | Sporadically          | Monthly               | Weekly                | Every day             |
|-------------------------------------------------------------|-----------------------|-----------------------|-----------------------|-----------------------|-----------------------|
| <b>In your own weather segment/programm</b>                 | <input type="radio"/> |
| <b>in a program different from your own weather segment</b> | <input type="radio"/> |
| <b>In your Media's Social Media Networks</b>                | <input type="radio"/> |
| <b>In your own Social Networks</b>                          | <input type="radio"/> |
| <b>On visits to schools</b>                                 | <input type="radio"/> |
| <b>On organizations in your community</b>                   | <input type="radio"/> |
| <b>On visits to the elderly</b>                             | <input type="radio"/> |

79. If you do not report sufficiently on Climate Change, the reason is \*  
(1: Strongly disagree; 2: Disagree; 3: Neither agree nor disagree; 4: Agree; 5: Strongly agree)

*Marca solo un óvalo por fila.*

|                                                   | 1                     | 2                     | 3                     | 4                     | 5                     |
|---------------------------------------------------|-----------------------|-----------------------|-----------------------|-----------------------|-----------------------|
| <b>I do not have time</b>                         | <input type="radio"/> |
| <b>It does not interest my editors/directors</b>  | <input type="radio"/> |
| <b>It does not interest my audience</b>           | <input type="radio"/> |
| <b>It does not interest my sponsors</b>           | <input type="radio"/> |
| <b>It causes rejection in my sponsors</b>         | <input type="radio"/> |
| <b>It causes negative feedback in my audience</b> | <input type="radio"/> |

80. How do you think the communication of Climate Change would be more effective?

81. Under what conditions are your directors / editors most willing to report on Climate Change?

\*

Marca solo un óvalo.

- ☐ Always
- ☐ Never
- ☐ When an extreme weather event occurs
- ☐ When a study appears about it
- ☐ Only when there are international meetings like the COP in Paris
- ☐ Otro: \_\_\_\_\_

82. Where do you express your personal opinion on Climate Change? \*

Marca solo un óvalo por fila.

|                                     | 1<br>(Never)          | 2                     | 3                     | 4                     | 5<br>(Always)         |
|-------------------------------------|-----------------------|-----------------------|-----------------------|-----------------------|-----------------------|
| On air in your own weather segment  | <input type="radio"/> |
| In your personal Social Networks    | <input type="radio"/> |
| In my media company social networks | <input type="radio"/> |
| In talks or conferences             | <input type="radio"/> |
| On air in other programs not my own | <input type="radio"/> |

Rate your degree of agreement with the following statements

(1: Strongly disagree; 2: Disagree; 3: Neither agree nor disagree; 4: Agree; 5: Strongly agree)

83. The amount of information that the media has offered to society about climate change so far, corresponds to the importance of the problem \*

*Marca solo un óvalo.*

1   2   3   4   5

Stro ☐ ☐ ☐ ☐ ☐ Strongly agree

84. The information that the media has offered to society about climate change so far, is correct, balanced and accurate. \*

*Marca solo un óvalo.*

1   2   3   4   5

Stro ☐ ☐ ☐ ☐ ☐ Strongly agree

85. What is the main difficulty in communicating climate change issues? \*

(1: Strongly disagree; 2: Disagree; 3: Neither agree nor disagree; 4: Agree; 5: Strongly agree)

Marca solo un óvalo por fila.

|                                                                        | 1                     | 2                     | 3                     | 4                     | 5                     |
|------------------------------------------------------------------------|-----------------------|-----------------------|-----------------------|-----------------------|-----------------------|
| The cultural level of society                                          | <input type="radio"/> |
| The self-interested disinformation of climate change denialist lobbies | <input type="radio"/> |
| Political pressure and interference                                    | <input type="radio"/> |
| The scientific complexity of the reports                               | <input type="radio"/> |
| The fact of being a very repetitive information                        | <input type="radio"/> |
| The possibility of falling into fatalism                               | <input type="radio"/> |
| The person in charge of explaining it                                  | <input type="radio"/> |

86. Other, please specify

\_\_\_\_\_

87. Who would be the most appropriate communicator to spread knowledge about climate change to society? \*

(1: Strongly disagree; 2: Disagree; 3: Neither agree nor disagree; 4: Agree; 5: Strongly agree)

Marca solo un óvalo por fila.

|                       | 1                     | 2                     | 3                     | 4                     | 5                     |
|-----------------------|-----------------------|-----------------------|-----------------------|-----------------------|-----------------------|
| Family                | <input type="radio"/> |
| School                | <input type="radio"/> |
| Church                | <input type="radio"/> |
| Journalists           | <input type="radio"/> |
| Government            | <input type="radio"/> |
| Weather presenters    | <input type="radio"/> |
| The empowered society | <input type="radio"/> |
| Social Networks       | <input type="radio"/> |
| It is not necessary   | <input type="radio"/> |
| The scientists        | <input type="radio"/> |
| Politicians           | <input type="radio"/> |

88. Other, please specify

\_\_\_\_\_

89. What would be a good indicator of climate change? \*
- (1: Strongly disagree; 2: Disagree; 3: Neither agree nor disagree; 4: Agree; 5: Strongly agree)

Marca solo un óvalo por fila.

|                                                            | 1                     | 2                     | 3                     | 4                     | 5                     |
|------------------------------------------------------------|-----------------------|-----------------------|-----------------------|-----------------------|-----------------------|
| <b>The quality of water available to society</b>           | <input type="radio"/> |
| <b>Pollution of rivers and seas</b>                        | <input type="radio"/> |
| <b>The amount of water available to society</b>            | <input type="radio"/> |
| <b>Ambient temperature</b>                                 | <input type="radio"/> |
| <b>Changes in sea level</b>                                | <input type="radio"/> |
| <b>Invasive species</b>                                    | <input type="radio"/> |
| <b>The degree of social alarm Climate Change generates</b> | <input type="radio"/> |
| <b>The atmospheric pollution</b>                           | <input type="radio"/> |
| <b>There is no Climate Change</b>                          | <input type="radio"/> |



90. Other, please specify

---

91. What would be the most appropriate message on Climate Change to spread to society? \*
- (1: Strongly disagree; 2: Disagree; 3: Neither agree nor disagree; 4: Agree; 5: Strongly agree)

*Marca solo un óvalo por fila.*

|                                                       | 1                     | 2                     | 3                     | 4                     | 5                     |
|-------------------------------------------------------|-----------------------|-----------------------|-----------------------|-----------------------|-----------------------|
| <b>We are in a Climate Emergency</b>                  | <input type="radio"/> |
| <b>We are in a Climate Crisis</b>                     | <input type="radio"/> |
| <b>We are in a Climate Catastrophe</b>                | <input type="radio"/> |
| <b>We can avoid climate change</b>                    | <input type="radio"/> |
| <b>We can reduce Climate Change</b>                   | <input type="radio"/> |
| <b>A message of hope</b>                              | <input type="radio"/> |
| <b>A message that scares people</b>                   | <input type="radio"/> |
| <b>A realistic message</b>                            | <input type="radio"/> |
| <b>A change in the economic model is necessary</b>    | <input type="radio"/> |
| <b>Technology alone will not solve Climate Change</b> | <input type="radio"/> |

Climate  
change  
does not  
exist

|                       |                       |                       |                       |                       |
|-----------------------|-----------------------|-----------------------|-----------------------|-----------------------|
| <input type="radio"/> |
|-----------------------|-----------------------|-----------------------|-----------------------|-----------------------|

92. Other, please specify

---

93. What do you think climate change should be broadly called? <sup>\*</sup>  
(1: Strongly disagree; 2: Disagree; 3: Neither agree nor disagree; 4: Agree; 5: Strongly agree)

*Marca solo un óvalo por fila.*

|                       | 1                     | 2                     | 3                     | 4                     | 5                     |
|-----------------------|-----------------------|-----------------------|-----------------------|-----------------------|-----------------------|
| <b>Climate Change</b> | <input type="radio"/> |
| <b>Global Warming</b> | <input type="radio"/> |

94. Please, specify if you have other options

---

95. In your opinion, who is more directly responsible for the fight against climate change? \*  
(1: Strongly disagree; 2: Disagree; 3: Neither agree nor disagree; 4: Agree; 5: Strongly agree)

Marca solo un óvalo por fila.

|                                    | 1                     | 2                     | 3                     | 4                     | 5                     |
|------------------------------------|-----------------------|-----------------------|-----------------------|-----------------------|-----------------------|
| <b>The government</b>              | <input type="radio"/> |
| <b>Society</b>                     | <input type="radio"/> |
| <b>Myself</b>                      | <input type="radio"/> |
| <b>Polluting industries</b>        | <input type="radio"/> |
| <b>Political parties</b>           | <input type="radio"/> |
| <b>Countries</b>                   | <input type="radio"/> |
| <b>Companies</b>                   | <input type="radio"/> |
| <b>International Organizations</b> | <input type="radio"/> |
| <b>Church</b>                      | <input type="radio"/> |
| <b>Press</b>                       | <input type="radio"/> |
| <b>Farm people</b>                 | <input type="radio"/> |

96. Other, please specify

\_\_\_\_\_

97. In your opinion, which channel would be the most effective to sensitize society about climate change? \*

(1: Strongly disagree; 2: Disagree; 3: Neither agree nor disagree; 4: Agree; 5: Strongly agree)

Marca solo un óvalo por fila.

|                               | 1                     | 2                     | 3                     | 4                     | 5                     |
|-------------------------------|-----------------------|-----------------------|-----------------------|-----------------------|-----------------------|
| Television                    | <input type="radio"/> |
| General press                 | <input type="radio"/> |
| Websites in internet          | <input type="radio"/> |
| The religious leader's sermon | <input type="radio"/> |
| Social Networks               | <input type="radio"/> |
| Every citizen speech          | <input type="radio"/> |
| Plays and movies              | <input type="radio"/> |
| Artistic works                | <input type="radio"/> |
| New contents in new media     | <input type="radio"/> |

98. Other, please specify

\_\_\_\_\_

99. What instrument (or resource) would allow for faster progress in the fight against climate change? \*

(1: Strongly disagree; 2: Disagree; 3: Neither agree nor disagree; 4: Agree; 5: Strongly agree)

Marca solo un óvalo por fila.

|                                                 | 1                     | 2                     | 3                     | 4                     | 5                     |
|-------------------------------------------------|-----------------------|-----------------------|-----------------------|-----------------------|-----------------------|
| <b>A more informed society</b>                  | <input type="radio"/> |
| <b>Penalties and fines</b>                      | <input type="radio"/> |
| <b>National regulations</b>                     | <input type="radio"/> |
| <b>International agreements</b>                 | <input type="radio"/> |
| <b>Technology</b>                               | <input type="radio"/> |
| <b>Changes in the economy</b>                   | <input type="radio"/> |
| <b>Progress is already being made correctly</b> | <input type="radio"/> |

100. Other, please specify

\_\_\_\_\_

101. Rate your level of agreement with the following statements about climate change. \*
- (1: Strongly disagree; 2: Disagree; 3: Neither agree nor disagree; 4: Agree; 5: Strongly agree)

*Marca solo un óvalo por fila.*

|                                                                              | 1                     | 2                     | 3                     | 4                     | 5                     |
|------------------------------------------------------------------------------|-----------------------|-----------------------|-----------------------|-----------------------|-----------------------|
| <b>It's a problem humanity has right now</b>                                 | <input type="radio"/> |
| <b>I worry about how it may affect my grandchildren</b>                      | <input type="radio"/> |
| <b>We are leaving a problem for our children</b>                             | <input type="radio"/> |
| <b>There are other more important problems that need to be solved before</b> | <input type="radio"/> |

102. In your country, with respect to the rest of the world, how you rate the opinion on the need to fight against climate change \*

*Marca solo un óvalo.*

- ☐ Is higher
- ☐ same
- ☐ Is lower
- ☐ We don't need to fight against climate change

103. In your country, the difference in awareness of the need to fight against climate change compared to the rest of the world is due to... \*

(1: Strongly disagree; 2: Disagree; 3: Neither agree nor disagree; 4: Agree; 5: Strongly agree)

*Marca solo un óvalo por fila.*

|                                                    | 1                     | 2                     | 3                     | 4                     | 5                     |
|----------------------------------------------------|-----------------------|-----------------------|-----------------------|-----------------------|-----------------------|
| <b>The highest level of training in my country</b> | <input type="radio"/> |
| <b>The best level of employment in my country</b>  | <input type="radio"/> |
| <b>A better informed society</b>                   | <input type="radio"/> |
| <b>Political motives</b>                           | <input type="radio"/> |
| <b>Religious motives</b>                           | <input type="radio"/> |
| <b>Corruption</b>                                  | <input type="radio"/> |



104. In your opinion, if not enough has been done to combat climate change in the 30 years since the publication of the first IPCC report in 1990, it is because: \*
- (1: Strongly disagree; 2: Disagree; 3: Neither agree nor disagree; 4: Agree; 5: Strongly agree)

*Marca solo un óvalo por fila.*

|                                                        | 1                     | 2                     | 3                     | 4                     | 5                     |
|--------------------------------------------------------|-----------------------|-----------------------|-----------------------|-----------------------|-----------------------|
| <b>Not enough was known about Climate Change</b>       | <input type="radio"/> |
| <b>Society has not been involved enough</b>            | <input type="radio"/> |
| <b>Governments have not been involved enough</b>       | <input type="radio"/> |
| <b>Information to society has failed</b>               | <input type="radio"/> |
| <b>Geopolitics and globalization have prevented it</b> | <input type="radio"/> |
| <b>Economic pressures have prevented it</b>            | <input type="radio"/> |

Results of the Survey

105. Do you want to receive the results of the survey? \*

*Marca solo un óvalo.*

☐ Yes

☐ No

106. If yes, enter your name

---

107. If yes, enter your email address

---

---

Este contenido no ha sido creado ni aprobado por Google.

Google Formularios
